# Supplementary material for: Palladium-catalyzed asymmetric intermolecular Mizoroki–Heck reaction for construction of a chiral quaternary carbon center
Source: Royal Society of Chemistry journal article supplement (doi:10.1039/c5cc03601a), 2015-01-01
Supplement: c5cc03601a1.pdf [file c5cc03601a1.pdf]

*Supporting Information*

**Palladium-Catalyzed Asymmetric Intermolecular Mizoroki-Heck Reaction for  
Construction of Chiral Quaternary Carbon Center**

Qing-Song Zhang,<sup>†</sup> Shi-Li Wan,<sup>†</sup> Di Chen,<sup>†</sup> Chang-Hua Ding,<sup>\*†</sup> and Xue-Long Hou<sup>\*†,‡</sup>

<sup>†</sup>State Key Laboratory of Organometallic Chemistry, <sup>‡</sup>Shanghai–Hong Kong Joint  
Laboratory in Chemical Synthesis, Shanghai Institute of Organic Chemistry, Chinese  
Academy of Sciences, 345 Lingling Road, Shanghai 200032, China.

[dingch@sioc.ac.cn](mailto:dingch@sioc.ac.cn); [xlhou@sioc.ac.cn](mailto:xlhou@sioc.ac.cn)

**Table of Contents**

|                                                                                                                                     |            |
|-------------------------------------------------------------------------------------------------------------------------------------|------------|
| <b>1. General Methods.....</b>                                                                                                      | <b>S2</b>  |
| <b>2. Pd(OAc)<sub>2</sub>/(<i>R</i>)-BINAP-catalyzed Heck Reaction of 2,3-dihydrofuran 1a and<br/>Triflate 2d.....</b>              | <b>S2</b>  |
| <b>3. Table 1. Optimization of Reaction Condition with (<i>R</i>)-BINAP(O).....</b>                                                 | <b>S3</b>  |
| <b>4. Table 2. Optimization of Reaction Condition with (<i>R</i>)-SDP(O).....</b>                                                   | <b>S4</b>  |
| <b>5. General experimental procedure for Pd-catalyzed Heck reaction of<br/>5-substituted-2,3-dihydrofuran 1 and triflate 2.....</b> | <b>S4</b>  |
| <b>6. Transformation of products 3a and 3e.....</b>                                                                                 | <b>S14</b> |
| <b>7. Pd-catalyzed Asymmetric Heck reaction of 5-methyl-2,3-dihydrofuran (1a)<br/>and triflate 2a on 2.0 mmol scale.....</b>        | <b>S15</b> |
| <b>8. Reference.....</b>                                                                                                            | <b>S15</b> |
| <b>9. Spectra of product.....</b>                                                                                                   | <b>S16</b> |

## 1. General Methods

The reactions were carried out in flame-dried glassware under a dry argon atmosphere. All solvents were purified and dried by using standard methods prior to use. Commercially available reagents were used without further purification.  $^1\text{H}$  NMR spectra were recorded on a NMR instrument operated at 400 MHz. Chemical shifts are reported in ppm from tetramethylsilane with the solvent resonance as the internal standard ( $\text{CDCl}_3$ :  $\delta$  7.26 ppm). Data are reported as follows: chemical shift, multiplicity (s = singlet, d = doublet, t = triplet, q = quartet, br = broad, m = multiplet or unresolved), coupling constants (Hz), and integration.  $^{13}\text{C}$  NMR spectra were recorded on a NMR instrument operated at 101 MHz with complete proton decoupling. Chemical shifts are reported in ppm from tetramethylsilane with the solvent resonance as the internal standard ( $\text{CDCl}_3$ :  $\delta$  77.1 ppm). Infrared spectra were recorded from thin films of pure samples. Mass and HRMS spectra were measured in EI or ESI mode and the mass analyzer type used for the HRMS was TOF. Thin layer chromatography was performed on pre-coated glassback plates and visualized with UV light at 254 nm. Flash column chromatography was performed on silica gel. Enantiomer ratios were determined by chiral HPLC analysis in comparison with authentic racemic materials.

## 2. $\text{Pd}(\text{OAc})_2/(\text{R})\text{-BINAP}$ -catalyzed Heck Reaction of 2,3-dihydrofuran 1a and Triflate 2d

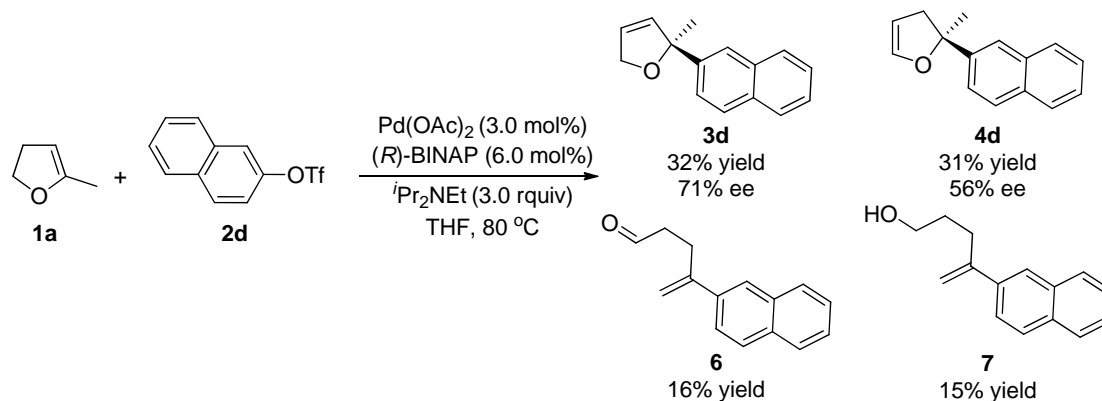

### 3. Table 1. Optimization of Reaction Condition with (*R*)-BINAP(O)<sup>a</sup>

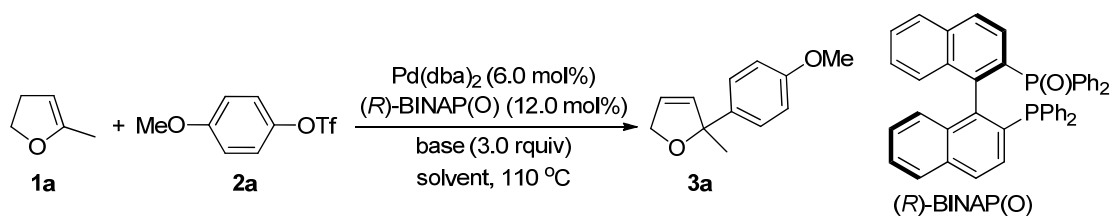

| entry          | Base                            | solvent                           | yield (%) <sup>b</sup> | ee (%) <sup>c</sup> |
|----------------|---------------------------------|-----------------------------------|------------------------|---------------------|
| 1              | <i>i</i> Pr <sub>2</sub> NEt    | toluene                           | 59                     | 87                  |
| 2              | <i>i</i> Pr <sub>2</sub> NEt    | DMF                               | 63                     | 87                  |
| 3              | <i>i</i> Pr <sub>2</sub> NEt    | DMSO                              | 4                      | 68                  |
| 4              | <i>i</i> Pr <sub>2</sub> NEt    | anisole                           | 68                     | 87                  |
| 5 <sup>d</sup> | <i>i</i> Pr <sub>2</sub> NEt    | DME                               | 75                     | 88                  |
| 6 <sup>d</sup> | <i>i</i> Pr <sub>2</sub> NEt    | MTBE                              | 75                     | 87                  |
| 7 <sup>d</sup> | <i>i</i> Pr <sub>2</sub> NEt    | 2-MeTHF                           | 74                     | 88                  |
| 8              | <i>i</i> Pr <sub>2</sub> NEt    | ( <sup>n</sup> Bu) <sub>2</sub> O | 75                     | 87                  |
| 9              | Et <sub>3</sub> N               | 1,4-dioxane                       | 58                     | 87                  |
| 10             | DABCO                           | 1,4-dioxane                       | 53                     | 12                  |
| 11             | Li <sub>2</sub> CO <sub>3</sub> | 1,4-dioxane                       | 13                     | 81                  |
| 12             | Na <sub>2</sub> CO <sub>3</sub> | 1,4-dioxane                       | 26                     | 87                  |
| 13             | NaOAc                           | 1,4-dioxane                       | 45                     | 87                  |
| 14             | KOAc                            | 1,4-dioxane                       | 48                     | 83                  |
| 15             | Cy <sub>2</sub> NMe             | 1,4-dioxane                       | 74                     | 87                  |
| 16             | PS                              | 1,4-dioxane                       | 66                     | 88                  |

<sup>a</sup>Conditions: molar ratio of **1a/2a/Pd(dba)<sub>2</sub>/L/base** = 500:100:6:12:300. <sup>b</sup>Isolated yield. <sup>c</sup>Determined by chiral HPLC. <sup>d</sup>Performed in sealed tube.

#### 4. Table 2. Optimization of Reaction Condition with (*R*)-SDP(O)<sup>a</sup>

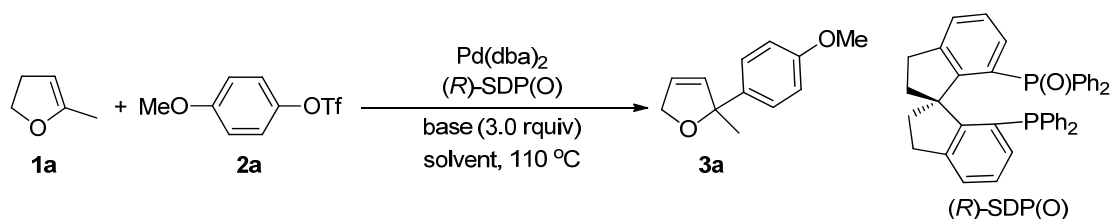

| entry          | [Pd]/[L]<br>(mol%) | base                         | Solvent                           | yield<br>(%) <sup>b</sup> | ee<br>(%) <sup>c</sup> |
|----------------|--------------------|------------------------------|-----------------------------------|---------------------------|------------------------|
| 1 <sup>d</sup> | 3/6                | <i>i</i> Pr <sub>2</sub> NEt | THF                               | 44                        | 93                     |
| 2 <sup>d</sup> | 6/6.6              | <i>i</i> Pr <sub>2</sub> NEt | THF                               | 46                        | 92                     |
| 3              | 6/6.6              | <i>i</i> Pr <sub>2</sub> NEt | ( <sup>n</sup> Bu) <sub>2</sub> O | 24                        | 95                     |
| 4 <sup>d</sup> | 6/12               | <i>i</i> Pr <sub>2</sub> NEt | THF                               | 47                        | 94                     |
| 5 <sup>d</sup> | 6/6.6              | Cy <sub>2</sub> NMe          | THF                               | 51                        | 89                     |
| 6 <sup>d</sup> | 5/10               | Cy <sub>2</sub> NMe          | THF                               | 81                        | 94                     |
| 7              | 6/12               | Cy <sub>2</sub> NMe          | toluene                           | 74                        | 90                     |
| 8              | 6/12               | Cy <sub>2</sub> NMe          | DMF                               | 39                        | 94                     |
| 9 <sup>d</sup> | 6/12               | Cy <sub>2</sub> NMe          | 2-MeTHF                           | 82                        | 95                     |
| 10             | 6/12               | Cy <sub>2</sub> NMe          | ( <sup>n</sup> Bu) <sub>2</sub> O | 83                        | 94                     |

<sup>a</sup>Conditions: molar ratio of **1a**/**2a**/base = 500/100/300. <sup>b</sup>Isolated yield. <sup>c</sup>Determined by chiral HPLC. <sup>d</sup>Performed in sealed tube.

#### 5. General experimental procedure for Pd-catalyzed Heck reaction of 5-substituted-2,3-dihydrofuran **1** and triflate **2**

To a flame dried sealed tube were added Pd(dba)<sub>2</sub> (6.9 mg, 0.012 mmol), (*R*)-SDP(O) (14.5 mg, 0.024 mmol), freshly distilled anhydrous THF (0.2 mL). The resulting mixture was allowed to stir for 30 mins. The 2,3-dihydrofuran **1** (1.0 mmol) and triflate **2** (0.2 mmol) were added subsequently, then dicyclohexylmethylamine (117.0 mg, 0.6 mmol) was added. The resulting reaction mixture was stirred at 110 °C for 24 h. After the reaction mixture was filtered through a celite, the ratio of **3** and **4** was determined by GC. After the volatile was removed in vacuo, the resulting residue was

purified by flash chromatography (FC) on silica gel with petroleum ether and ethyl acetate as eluent to give the product **3**.

(*S*)-2-(4-methoxyphenyl)-2-methyl-2,5-dihydrofuran (**3a**)<sup>1</sup>

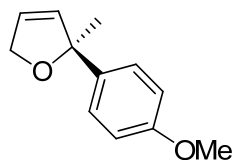

Colorless oil, 31.9 mg, yield: 84%, ee: 95%,  $[\alpha]_D^{25} = -122.4$  (*c* 1.0, CHCl<sub>3</sub>); HPLC (Chiralpak OD-H, 4.6×250 mm, Hexane/*i*-Propanol = 99.5/0.5, 1.0 mL/min, 214 nm),  $t_R = 10.27$  min (major), 15.05 min (minor); <sup>1</sup>H NMR (400 MHz, CDCl<sub>3</sub>)  $\delta$  7.33 (d, *J* = 8.4 Hz, 2H), 6.87 (d, *J* = 8.4 Hz, 2H), 5.98-5.97 (m, 1H), 5.86 (d, *J* = 6 Hz, 1H), 4.78 (dd, *J* = 13.2, 24.8 Hz, 2H), 3.80 (s, 3H), 1.64 (s, 3H); <sup>13</sup>C NMR (101 MHz, CDCl<sub>3</sub>)  $\delta$  158.4, 138.5, 134.4, 125.9, 124.8, 113.6, 90.3, 74.6, 55.2, 27.9; IR (film) 2837, 1610, 1509, 1240, 1076, 1016, 829, 704 cm<sup>-1</sup>; MS (EI) *m/z*: 77 (17), 91 (33), 115 (26), 132 (12), 147 (44), 160 (40), 175 (100), 190 (M<sup>+</sup>, 9); HRMS (EI) Calcd for C<sub>12</sub>H<sub>14</sub>O<sub>2</sub>: 190.0994, found: 190.0991.

(*S*)-2-(3,4-dimethoxyphenyl)-2-methyl-2,5-dihydrofuran (**3b**)

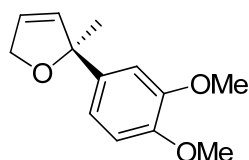

Colorless oil, 42.2 mg, yield: 96%, ee: 94%,  $[\alpha]_D^{25} = -100.9$  (*c* 1.0, CHCl<sub>3</sub>); HPLC (Chiralpak OD-H, 4.6×250 mm, Hexane/*i*-Propanol = 95/5, 1.0 mL/min, 214 nm),  $t_R = 10.37$  min (minor), 11.09 min (major); <sup>1</sup>H NMR (400 MHz, CDCl<sub>3</sub>)  $\delta$  6.97 (d, *J* = 2.0 Hz, 1H), 6.91-6.81 (m, 2H), 6.00-5.97 (m, 1H), 5.88-5.85 (m, 1H), 4.81-4.71 (m, 2H), 3.88 (s, 3H), 3.85 (s, 3H), 1.63 (s, 3H); <sup>13</sup>C NMR (101 MHz, CDCl<sub>3</sub>)  $\delta$  148.7, 147.8, 139.1, 134.3, 124.9, 116.8, 110.8, 108.4, 90.4, 74.6, 55.9, 55.8, 28.1; IR (film) 2836, 1512, 1259, 1018, 752, 712 cm<sup>-1</sup>; MS (EI) *m/z*: 77 (11), 91 (12), 115 (11), 143 (1), 174 (11), 205 (100), 220 (M<sup>+</sup>, 14); HRMS (EI) Calcd for C<sub>13</sub>H<sub>16</sub>O<sub>3</sub>: 220.1099, found: 220.1096.

(*S*)-*tert*-butyl 5-(2-methyl-2,5-dihydrofuran-2-yl)-1*H*-indole-1-carboxylate (**3c**)

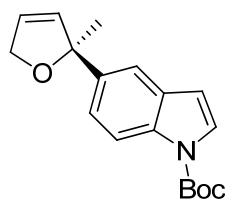

Colorless oil, 44.3 mg, yield: 74%, ee: 92%,  $[\alpha]_D^{25} = -106.4$  ( $c$  1.0,  $\text{CHCl}_3$ ); HPLC (Chiralpak OD-H, 4.6×250 mm, Hexane/*i*-Propanol = 99.5/0.5, 1.0 mL/min, 214 nm),  $t_R = 7.66$  min (major), 9.26 min (minor);  $^1\text{H NMR}$  (400 MHz,  $\text{CDCl}_3$ )  $\delta$  8.25 (s, 1H), 7.59 (s, 1H), 7.52 (d,  $J = 8.0$  Hz, 1H), 7.32 (d,  $J = 8.0$  Hz, 1H), 6.54 (d,  $J = 2.8$  Hz, 1H), 6.09-6.08 (m, 1H), 5.89 (d,  $J = 6.0$  Hz, 1H), 4.81 (dd,  $J = 12.4, 20.4$  Hz, 2H), 1.74 (s, 3H), 1.69 (s, 9H);  $^{13}\text{C NMR}$  (101 MHz,  $\text{CDCl}_3$ )  $\delta$  149.8, 142.8, 135.2, 134.8, 129.4, 126.1, 124.8, 120.7, 119.9, 111.6, 107.0, 91.0, 83.5, 74.7, 28.3, 28.2; IR (film) 2975, 1728, 1334, 1152, 1080, 1018, 713  $\text{cm}^{-1}$ ; MS (EI)  $m/z$ : 57 (100), 115 (8), 129 (26), 156 (38), 183 (9), 228 (74), 284 (22), 299 ( $\text{M}^+$ , 8); HRMS (EI) Calcd for  $\text{C}_{18}\text{H}_{21}\text{NO}_3$ : 299.1521, found: 299.1524.

(*S*)-2-methyl-2-(naphthalen-2-yl)-2,5-dihydrofuran (**3d**)

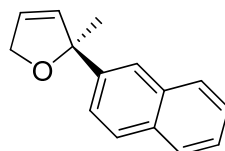

Colorless oil, 23.9 mg, yield: 57%, ee: 84%,  $[\alpha]_D^{25} = -144.1$  ( $c$  1.0,  $\text{CHCl}_3$ ); HPLC (Chiralpak OD-H, 4.6×250 mm, Hexane/*i*-Propanol = 99.5/0.5, 1.0 mL/min, 214 nm),  $t_R = 8.52$  min (major), 14.28 min (minor);  $^1\text{H NMR}$  (400 MHz,  $\text{CDCl}_3$ )  $\delta$  7.89-7.82 (m, 4H), 7.54-7.43 (m, 3H), 6.13-6.10 (m, 1H), 5.93-5.91 (m, 1H), 4.91-4.81 (m, 2H), 1.76 (s, 3H);  $^{13}\text{C NMR}$  (101 MHz,  $\text{CDCl}_3$ )  $\delta$  143.8, 134.2, 133.3, 132.4, 128.1, 127.9, 127.5, 126.0, 125.7, 125.2, 123.7, 122.8, 90.8, 74.8, 28.1; IR (film) 2843, 1080, 1017, 816, 745, 710  $\text{cm}^{-1}$ ; MS (EI)  $m/z$ : 83 (24), 115 (8), 127 (16), 152 (27), 167 (61), 177 (23), 195 (100), 210 ( $\text{M}^+$ , 23); HRMS (EI) Calcd for  $\text{C}_{15}\text{H}_{14}\text{O}$ : 210.1045, found: 210.1046.

(*S*)-2-methyl-2-phenyl-2,5-dihydrofuran (**3e**)<sup>2</sup>

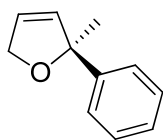

Colorless oil, 20.2 mg, yield: 63%, ee: 94%,  $[\alpha]_D^{25} = -165.2$  ( $c$  1.0,  $\text{CHCl}_3$ ); Agilent 1260 SSC (Chiralpak IC, 4.6×250 mm,  $\text{CO}_2/i$ -Propanol = 95/5, 1.3 mL/min, 214 nm),  $t_R = 4.80$  min (minor), 6.15 min (major);  $^1\text{H}$  NMR (400 MHz,  $\text{CDCl}_3$ )  $\delta$  7.41 (d,  $J = 4$  Hz, 2H), 7.36-7.32 (m, 2H), 7.24-7.21 (m, 1H), 6.03-6.00 (m, 1H), 5.88-5.86 (m, 1H), 4.84-4.73 (m, 2H), 1.65 (s, 3H);  $^{13}\text{C}$  NMR (101 MHz,  $\text{CDCl}_3$ )  $\delta$  146.4, 134.2, 128.2, 126.8, 124.9, 124.7, 90.6, 74.7, 28.1; MS (EI)  $m/z$ : 75 (8), 77 (11), 89 (6), 109 (29), 119 (10), 140 (8), 159 (100), 160 ( $\text{M}^+$ , 10).

(*S*)-2-methyl-2-(*m*-tolyl)-2,5-dihydrofuran (**3f**)

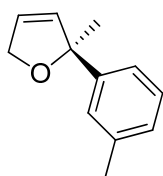

Colorless oil, 27.3 mg, yield: 78%, ee: 90%,  $[\alpha]_D^{25} = -290.1$  ( $c$  1.0,  $\text{CHCl}_3$ ); Agilent 1260 SSC (Chiralpak OJ-H, 4.6×250 mm,  $\text{CO}_2/i$ -Propanol = 95/5, 1.0 mL/min, 214 nm),  $t_R = 6.16$  min (major), 6.97 min (minor);  $^1\text{H}$  NMR (400 MHz,  $\text{CHCl}_3$ )  $\delta$  7.26-7.20 (m, 3H), 7.07 (d,  $J = 7.2$  Hz, 1H), 6.03-6.01 (m, 1H), 5.87 (d,  $J = 6.4$  Hz, 1H), 4.84-4.74 (m, 2H), 2.37 (s, 3H), 1.65 (s, 3H);  $^{13}\text{C}$  NMR (101 MHz,  $\text{CHCl}_3$ )  $\delta$  146.3, 137.9, 134.3, 128.2, 127.6, 125.4, 124.9, 121.7, 90.6, 74.7, 28.2, 21.6; IR (film) 2844, 1073, 1018, 784, 715, 697  $\text{cm}^{-1}$ ; MS (EI)  $m/z$ : 77 (8), 83 (20), 91 (38), 115 (25), 131 (61), 144 (12), 159 (100), 174 ( $\text{M}^+$ , 0.4); HRMS (EI) Calcd for  $\text{C}_{12}\text{H}_{14}\text{O}$ : 174.1045, found: 174.1050.

(*R*)-2-methyl-2-(*o*-tolyl)-2,5-dihydrofuran (**3g**)

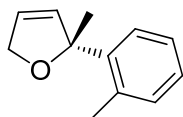

Colorless oil, 15.7 mg, yield: 45%, ee: 96% [(*R*)-BINAP(O) used as the ligand],

$[\alpha]_D^{25} = 65.9$  ( $c$  1.0,  $\text{CHCl}_3$ ); Agilent 1260 SSC(Chiralpak OJ-H,  $4.6 \times 250$  mm,  $\text{CO}_2/i$ -Propanol = 95/5, 1.3 mL/min, 214 nm),  $t_R = 6.33$  min (major), 7.53 min (minor);  $^1\text{H}$  NMR (400 MHz,  $\text{CHCl}_3$ )  $\delta$  7.52-7.50 (m, 1H), 7.19-7.15 (m, 3H), 6.27-6.24 (m, 1H), 5.92 (d,  $J = 6.0$  Hz, 1H), 4.79-4.63 (m, 2H), 2.51 (s, 3H), 1.68 (s, 3H);  $^{13}\text{C}$  NMR (101 MHz,  $\text{CHCl}_3$ )  $\delta$  143.8, 134.6, 133.0, 132.1, 127.0, 125.9, 125.7, 125.4, 91.2, 73.6, 28.0, 21.5; IR (film) 2841, 1079, 1018, 757, 727, 702  $\text{cm}^{-1}$ ; MS (EI)  $m/z$ : 77 (10), 83 (30), 91 (41), 115 (29), 131 (63), 144 (14), 159 (100), 174 ( $\text{M}^+$ , 0.3); HRMS (EI) Calcd for  $\text{C}_{12}\text{H}_{14}\text{O}$ : 174.1045, found: 174.1047.

(*S*)-2-(4-fluorophenyl)-2-methyl-2,5-dihydrofuran (**3h**)

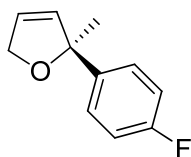

Colorless oil, 22.8 mg, yield: 64%, ee: 95%,  $[\alpha]_D^{25} = -140.8$  ( $c$  1.0,  $\text{CHCl}_3$ ); Agilent 1260 SSC(Chiralpak OJ-H,  $4.6 \times 250$  mm,  $\text{CO}_2/i$ -Propanol = 95/5, 1.3 mL/min, 214 nm),  $t_R = 5.94$  min (minor), 6.28 min (major);  $^1\text{H}$  NMR (400 MHz,  $\text{CDCl}_3$ )  $\delta$  7.38-7.35 (m, 2H), 7.04-6.98 (m, 2H), 5.98-5.96 (m, 1H), 5.88 (d,  $J = 6.0$  Hz, 1H), 4.82-4.71 (m, 2H), 1.63 (s, 3H);  $^{13}\text{C}$  NMR (101 MHz,  $\text{CDCl}_3$ )  $\delta$  161.7 (d,  $J_{\text{C-F}} = 246.1$  Hz), 142.2, 134.1, 126.4 (d,  $J_{\text{C-F}} = 7.7$  Hz), 125.1, 115.0 (d,  $J_{\text{C-F}} = 21.5$  Hz), 90.2, 74.7, 28.1;  $^{19}\text{F}$  NMR (376 MHz,  $\text{CDCl}_3$ )  $\delta$  -116.39 (m); IR (film) 2847, 1228, 1077, 1015, 796, 701  $\text{cm}^{-1}$ ; MS (EI)  $m/z$ : 77 (4), 85 (72), 109 (30), 115 (27), 135 (51), 145 (25), 163 (100), 168 (3), 178 ( $\text{M}^+$ , 0.2); HRMS (EI) Calcd for  $\text{C}_{11}\text{H}_{11}\text{OF}$ : 178.0794, found: 178.0792.

(*S*)-2-(3-fluorophenyl)-2-methyl-2,5-dihydrofuran (**3i**)

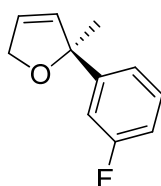

Colorless oil, 11.0 mg, yield: 31%, ee: 90%,  $[\alpha]_D^{25} = -111.3$  ( $c$  1.0,  $\text{CHCl}_3$ ); Agilent 1260 SSC(Chiralpak OJ-H,  $4.6 \times 250$  mm,  $\text{CO}_2/i$ -Propanol = 9/1, 1.3 mL/min, 214 nm),



$t_R = 4.21$  min (major),  $4.55$  min (minor);  $^1\text{H}$  NMR (400 MHz,  $\text{CDCl}_3$ )  $\delta$  7.31-7.27 (m, 1H), 7.16-7.11 (m, 2H), 6.94-6.89 (m, 1H), 5.98-5.95 (m, 1H), 5.88 (d,  $J = 6.0$  Hz, 1H), 4.83-4.72 (m, 2H), 1.63 (s, 3H);  $^{13}\text{C}$  NMR (101 MHz,  $\text{CDCl}_3$ )  $\delta$  162.9 (d,  $J_{\text{C-F}} = 246.3$  Hz), 149.2 (d,  $J_{\text{C-F}} = 5.9$  Hz), 133.7, 129.7 (d,  $J_{\text{C-F}} = 8.2$  Hz), 125.4, 120.2 (d,  $J_{\text{C-F}} = 2.2$  Hz), 113.5 (d,  $J_{\text{C-F}} = 21.7$  Hz), 111.9 (d,  $J_{\text{C-F}} = 22.5$  Hz), 90.3, 74.8, 28.0;  $^{19}\text{F}$  NMR (376 MHz,  $\text{CDCl}_3$ )  $\delta$  -113.07 (m); IR (film) 2850, 1588, 1261, 1080, 1018, 753, 691  $\text{cm}^{-1}$ ; MS (EI)  $m/z$ : 77 (4), 85 (100), 109 (20), 115 (18), 135 (37), 145 (12), 163 (65), 177 (0.2); HRMS (EI) Calcd for  $\text{C}_{11}\text{H}_{11}\text{OF}$ : 178.0794, found: 178.0798.

(*S*)-2-(2-fluorophenyl)-2-methyl-2,5-dihydrofuran (**3j**)

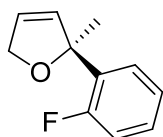

Colorless oil, 7.3 mg, yield: 21%, ee: 90%,  $[\alpha]_D^{25} = -160.4$  ( $c$  1.0,  $\text{CHCl}_3$ ); Agilent 1260 SSC (Chiralpak IC,  $4.6 \times 250$  mm,  $\text{CO}_2/i$ -Propanol = 95/5, 1.3 mL/min, 214 nm),  $t_R = 3.53$  min (minor), 3.71 min (major);  $^1\text{H}$  NMR (400 MHz,  $\text{CDCl}_3$ )  $\delta$  7.63-7.58 (m, 1H), 7.24-7.18 (m, 1H), 7.13-7.09 (m, 1H), 7.03-6.98 (m, 1H), 6.27-6.24 (m, 1H), 5.83 (d,  $J = 6.0$  Hz, 1H), 4.82-4.66 (m, 2H), 1.66 (s, 3H);  $^{13}\text{C}$  NMR (101 MHz,  $\text{CDCl}_3$ )  $\delta$  158.6 (d,  $J_{\text{C-F}} = 245.3$  Hz), 132.8 (d,  $J_{\text{C-F}} = 4.6$  Hz), 128.5 (d,  $J_{\text{C-F}} = 7.6$  Hz), 126.3 (d,  $J_{\text{C-F}} = 5.4$  Hz), 125.2, 124.1 (2C), 115.7 (d,  $J_{\text{C-F}} = 2.3$  Hz), 88.9 (d,  $J_{\text{C-F}} = 3.0$  Hz), 74.2, 27.8 (d,  $J_{\text{C-F}} = 3.0$  Hz);  $^{19}\text{F}$  NMR (376 MHz,  $\text{CDCl}_3$ )  $\delta$  -114.80 (m); IR (film) 2850, 1480, 1141, 1019, 756, 705  $\text{cm}^{-1}$ ; MS (EI)  $m/z$ : 77 (3), 83 (17), 109 (28), 115 (28), 135 (47), 145 (25), 163 (100), 177 (0.2); HRMS (EI) Calcd for  $\text{C}_{11}\text{H}_{11}\text{OF}$ : 178.0794, found: 178.0791.

(*S*)-2-(4-methoxyphenyl)-2-propyl-2,5-dihydrofuran (**3k**)

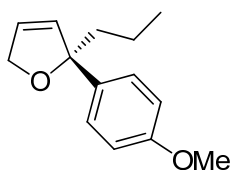

Colorless oil, 24.8 mg, yield: 57%, ee: 95%,  $[\alpha]_D^{25} = -107.5$  ( $c$  1.0,  $\text{CHCl}_3$ ); HPLC

(Chiralpak OD-H, 4.6×250 mm, Hexane/*i*-Propanol = 99/1, 1.0 mL/min, 214 nm),  $t_R$  = 8.05 min (major), 10.94 min (minor);  $^1\text{H}$  NMR (400 MHz,  $\text{CDCl}_3$ )  $\delta$  7.30 (d,  $J$  = 8.8 Hz, 2H), 6.87 (d,  $J$  = 8.4 Hz, 2H), 5.98-5.95 (m, 1H), 5.87 (d,  $J$  = 6.0 Hz, 1H), 4.78-4.68 (m, 2H), 3.80 (s, 3H), 1.91-1.83 (m, 2H), 1.37-1.27 (m, 2H), 0.94 (t,  $J$  = 7.2 Hz, 3H);  $^{13}\text{C}$  NMR (101 MHz,  $\text{CDCl}_3$ )  $\delta$  158.2, 138.4, 132.8, 125.9, 125.4, 113.5, 93.3, 75.0, 55.2, 43.8, 17.5, 14.4; IR (film) 2849, 1730, 1336, 1248, 1042, 732  $\text{cm}^{-1}$ ; MS (EI)  $m/z$ : 77 (9), 115 (15), 132 (7), 147 (24), 160 (24), 175 (100), 218 ( $\text{M}^+$ , 0.2); HRMS (EI) Calcd for  $\text{C}_{14}\text{H}_{18}\text{O}_2$ : 218.1307, found: 218.1308.

(*S*)-*tert*-butyl 5-(2-propyl-2,5-dihydrofuran-2-yl)-1*H*-indole-1-carboxylate (**3l**)

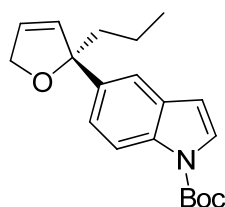

Colorless oil, 51.0 mg, yield: 78%, ee: 94%,  $[\alpha]_D^{25}$  = -83.3 ( $c$  1.0,  $\text{CHCl}_3$ ); Agilent 1260 SSC(Chiralpak OD-H, 4.6×250 mm,  $\text{CO}_2$ /*i*-Propanol = 95/5, 1.3 mL/min, 214 nm),  $t_R$  = 10.21 min (minor), 11.19 min (major);  $^1\text{H}$  NMR (400 MHz,  $\text{CDCl}_3$ )  $\delta$  8.21 (s, 1H), 7.58 (d,  $J$  = 3.2 Hz, 1H), 7.52 (d,  $J$  = 8.0 Hz, 1H), 7.29 (d,  $J$  = 4.4 Hz, 1H), 6.53 (d,  $J$  = 1.8 Hz, 1H), 6.08-6.06 (m, 1H), 5.89 (d,  $J$  = 6 Hz, 1H), 4.83-4.74 (m, 2H), 2.0-1.93 (m, 2H), 1.69 (s, 9H), 1.42-1.27 (m, 2H), 0.92 (t,  $J$  = 7.2 Hz 3H);  $^{13}\text{C}$  NMR (101 MHz,  $\text{CDCl}_3$ )  $\delta$  149.8, 142.6, 135.2, 133.1, 129.2, 125.9, 125.4, 120.6, 119.9, 111.6, 107.0, 94.0, 83.4, 75.1, 44.1, 28.2, 17.5, 14.4; IR (film) 2958, 1730, 1335, 1249, 1151, 713  $\text{cm}^{-1}$ ; MS (EI)  $m/z$ : 77 (12), 116 (9), 129 (36), 156 (44), 184 (100), 227 (4), 327 ( $\text{M}^+$ , 0.2); HRMS (EI) Calcd for  $\text{C}_{15}\text{H}_{17}\text{NO}$  ( $\text{M} - \text{C}_5\text{H}_8\text{O}_2$ ) $^+$ : 227.1310, found: 227.1311.

(*S*)-2-(3-(benzyloxy)propyl)-2-(4-methoxyphenyl)-2,5-dihydrofuran (**3m**)

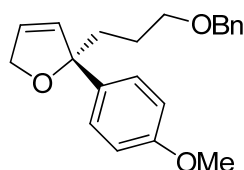

Colorless oil, 53.8 mg, yield: 83%, ee: 97%,  $[\alpha]_D^{25} = -62.4$  ( $c$  1.0,  $\text{CHCl}_3$ ); HPLC (Chiralpak OD-H, 4.6×250 mm, Hexane/*i*-Propanol = 98/2, 1.0 mL/min, 214 nm),  $t_R = 13.69$  min (major), 16.17 min (minor);  $^1\text{H}$  NMR (400 MHz,  $\text{CDCl}_3$ )  $\delta$  7.37-7.30 (m, 7H), 6.87 (d,  $J = 8.8$  Hz, 2H), 5.97-5.95 (m, 1H), 5.88 (d,  $J = 6.0$  Hz, 1H), 4.78-4.70 (m, 2H), 4.49 (s, 2H), 3.80 (s, 3H), 3.51-3.44 (m, 2H), 2.00-1.96 (m, 2H), 1.70-1.63 (m, 2H);  $^{13}\text{C}$  NMR (101 MHz,  $\text{CDCl}_3$ )  $\delta$  158.3, 138.6, 138.2, 132.6, 128.3, 127.6, 127.5, 125.9, 125.6, 113.6, 93.0, 75.2, 72.8, 70.6, 55.2, 37.9, 24.6; IR (film) 2842, 1609, 1509, 1245, 1078, 1032, 829, 735, 697  $\text{cm}^{-1}$ ; MS (EI)  $m/z$ : 77 (9), 115 (10), 144 (4), 147 (17), 160 (14), 175 (100), 233 (3), 324 ( $\text{M}^+$ , 2); HRMS (EI) Calcd for  $\text{C}_{21}\text{H}_{24}\text{O}_3$ : 324.1725, found: 324.1721.

(*S*)-*tert*-butyl5-(2-(3-(benzyloxy)propyl)-2,5-dihydrofuran-2-yl)-1*H*-indole-1-carboxylate (**3n**)

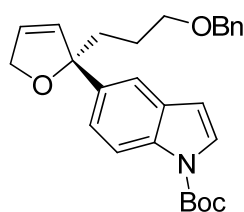

Colorless oil, 73.6 mg, yield: 85%, ee: 96%,  $[\alpha]_D^{25} = -62.8$  ( $c$  1.0,  $\text{CHCl}_3$ ); Agilent 1260 SSC (Chiralpak AD-H, 4.6×250 mm,  $\text{CO}_2$ /*i*-Propanol = 9/1, 1.3 mL/min, 214 nm),  $t_R = 14.54$  min (minor), 15.37 min (major);  $^1\text{H}$  NMR (400 MHz,  $\text{CDCl}_3$ )  $\delta$  8.24 (s, 1H), 7.59 (d,  $J = 2.4$  Hz 1H), 7.52 (d,  $J = 8$  Hz, 1H), 7.37-7.29 (m, 6H), 6.55 (d,  $J = 3.6$  Hz, 1H), 6.09-6.07 (m, 1H), 5.91 (d,  $J = 6.0$  Hz, 1H), 4.83-4.76 (m, 2H), 4.49 (s, 2H), 3.53-3.46 (m, 2H), 2.10-2.07 (m, 2H), 1.77-1.66 (m, 2H), 1.70 (s, 9H);  $^{13}\text{C}$  NMR (101 MHz,  $\text{CDCl}_3$ )  $\delta$  149.8, 142.4, 138.6, 135.2, 132.9, 129.3, 128.3, 127.6, 127.4, 125.9, 125.7, 120.6, 119.9, 111.7, 107.0, 93.8, 83.5, 75.2, 72.8, 70.6, 38.3, 28.2, 24.7; IR (film) 2950, 1730, 1336, 1248, 1042, 732  $\text{cm}^{-1}$ ; MS (EI)  $m/z$ : 57 (13), 91 (20), 154 (15), 156 (12), 184 (28), 228 (100), 229 (15), 284 (48), 433 ( $\text{M}^+$ , 0.4); HRMS (EI) Calcd for  $\text{C}_{27}\text{H}_{31}\text{NO}_4$ : 433.2253, found: 433.2249.

(*S*)-2-(3-(benzyloxy)propyl)-2-phenyl-2,5-dihydrofuran (**3o**)

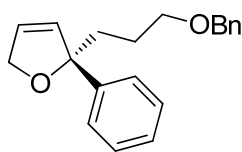

Colorless oil, 32.4 mg, yield: 55%, ee: 93%,  $[\alpha]_D^{25} = -61.4$  (*c* 1.0, CHCl<sub>3</sub>); HPLC (Chiralpak OD-H, 4.6×250 mm, Hexane/*i*-Propanol = 99/1, 1.0 mL/min, 214 nm),  $t_R = 10.52$  min (minor), 14.09 min (major); <sup>1</sup>H NMR (400 MHz, CDCl<sub>3</sub>)  $\delta$  7.39-7.36 (m, 2H), 7.34-7.31 (m, 6H), 7.29-7.20 (m, 2H), 5.99-5.96 (m, 1H), 5.88 (d, *J* = 6.0 Hz, 1H), 4.79-4.70 (m, 2H), 4.47 (s, 2H), 3.50-3.41 (m, 2H), 2.01-1.96 (m, 2H), 1.70-1.60 (m, 2H); <sup>13</sup>C NMR (101 MHz, CDCl<sub>3</sub>)  $\delta$  145.9, 138.6, 132.4, 128.3, 128.2, 127.6, 127.5, 126.6, 125.8, 124.7, 93.4, 75.2, 72.8, 70.5, 38.0, 24.5; IR (film) 2849, 1449, 1086, 1028, 696 cm<sup>-1</sup>; MS (EI) *m/z*: 65 (7), 77 (7), 91 (35), 117 (24), 145 (100), 203 (1), 294 (M<sup>+</sup>, 0.1); HRMS (EI) Calcd for C<sub>20</sub>H<sub>22</sub>O<sub>2</sub>: 294.1620, found: 294.1626.

(*S*)-2-(3-(benzyloxy)propyl)-2-(*m*-tolyl)-2,5-dihydrofuran (**3p**)

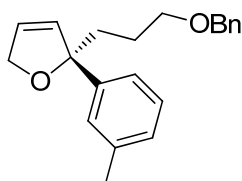

Colorless oil, 39.0 mg, yield: 63%, ee: 95%,  $[\alpha]_D^{25} = -59.7$  (*c* 1.0, CHCl<sub>3</sub>); Agilent 1260 SSC (Chiralpak AD-H, 4.6×250 mm, CO<sub>2</sub>/*i*-Propanol = 99/1, 1.3 mL/min, 214 nm),  $t_R = 8.65$  min (major), 9.24 min (minor); <sup>1</sup>H NMR (400 MHz, CDCl<sub>3</sub>)  $\delta$  7.36-7.27 (m, 5H), 7.24-7.16 (m, 3H), 7.04 (d, *J* = 7.2 Hz, 1H), 5.99-5.97 (m, 1H), 5.88 (d, *J* = 6.4 Hz, 1H), 4.79-4.70 (m, 2H), 4.48 (s, 2H), 3.52-3.42 (m, 2H), 2.35 (s, 3H), 2.0-1.95 (m, 2H), 1.70-1.61 (m, 2H); <sup>13</sup>C NMR (101 MHz, CDCl<sub>3</sub>)  $\delta$  145.9, 138.6, 137.8, 132.5, 128.3, 128.2, 127.6, 127.4, 127.4, 125.7, 125.4, 121.8, 93.4, 75.2, 72.8, 70.6, 38.1, 24.5, 21.6; IR (film) 2949, 1079, 1031, 734, 717, 696 cm<sup>-1</sup>; MS (EI) *m/z*: 65 (8), 91 (42), 115 (9), 144 (6), 159 (100), 160 (12), 217 (1), 308 (M<sup>+</sup>, 0.1); HRMS (EI) Calcd for C<sub>21</sub>H<sub>24</sub>O<sub>2</sub>: 308.1776, found: 308.1775.

(*S*)-ethyl 4-(2-(3-(benzyloxy)propyl)-2,5-dihydrofuran-2-yl)benzoate (**3q**)

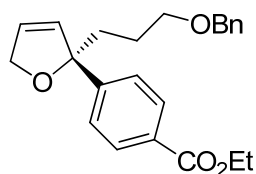

Colorless oil, 22.1 mg, yield: 30%, ee: 70%,  $[\alpha]_D^{25} = -35.5$  ( $c$  1.0,  $\text{CHCl}_3$ ); Agilent 1260 SSC (Chiralpak AD-H, 4.6×250 mm,  $\text{CO}_2/i$ -Propanol = 9/1, 1.3 mL/min, 214 nm),  $t_R = 23.32$  min (minor), 25.56 min (major);  $^1\text{H}$  NMR (400 MHz,  $\text{CDCl}_3$ )  $\delta$  8.01-7.98 (m, 2H), 7.48-7.42 (m, 2H), 7.35-7.28 (m, 5H), 5.97-5.94 (m, 1H), 5.90 (d,  $J = 6.0$  Hz, 1H), 4.80-4.70 (m, 2H), 4.46 (s, 2H), 4.39-4.34 (m, 2H), 3.50-3.40 (m, 2H), 2.00-1.95 (m, 2H), 1.71-1.57 (m, 2H), 1.38 (t,  $J = 7.2$  Hz, 3H);  $^{13}\text{C}$  NMR (101 MHz,  $\text{CDCl}_3$ )  $\delta$  166.5, 150.9, 138.5, 131.9, 129.6, 128.8, 128.3, 127.6, 127.5, 126.3, 124.8, 93.3, 75.3, 72.8, 70.3, 60.8, 37.9, 24.4, 14.3; IR (film) 2851, 1712, 1271, 1100, 1081, 697  $\text{cm}^{-1}$ ; MS (EI)  $m/z$ : 65 (10), 91 (56), 115 (21), 145 (8), 191 (4), 207 (38), 217 (100), 366 ( $\text{M}^+$ , 0.5); HRMS (EI) Calcd for  $\text{C}_{23}\text{H}_{26}\text{O}_4$ : 366.1831, found: 366.1825.

(*R*)-trimethyl(2-phenyl-2,5-dihydrofuran-2-yl)silane (**3r**)

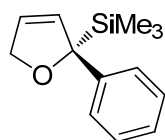

Colorless oil, 20.0 mg, yield: 46%, ee: 93%,  $[\alpha]_D^{25} = -27.9$  ( $c$  1.0,  $\text{CHCl}_3$ ); Agilent 1260 SSC(Chiralpak OJ-H, 4.6×250 mm,  $\text{CO}_2/i$ -Propanol = 95/5, 1.3 mL/min, 214 nm),  $t_R = 6.69$  min (major), 8.43 min (minor);  $^1\text{H}$  NMR (400 MHz,  $\text{CDCl}_3$ )  $\delta$  7.33-7.29 (m, 2H), 7.26-7.24 (m, 2H), 7.16 (t,  $J = 7.2$  Hz 1H), 6.23-6.20 (m, 1H), 5.82-5.80 (m, 1H), 4.85-4.71 (m, 2H), 0.01 (s, 9H);  $^{13}\text{C}$  NMR (101 MHz,  $\text{CDCl}_3$ )  $\delta$  144.9, 130.6, 128.0, 125.3, 124.1, 123.6, 90.6, 75.7, -4.1; IR (film) 2840, 1246, 1107, 832, 741, 696  $\text{cm}^{-1}$ ; MS (EI)  $m/z$ : 56 (11), 73 (100), 115 (34), 127 (21), 145 (38), 159 (2), 217 (39), 218.0 ( $\text{M}^+$ , 18); HRMS (EI) Calcd for  $\text{C}_{13}\text{H}_{17}\text{OSi}$  ( $\text{M} - \text{H}$ ) $^+$ : 217.1049, found: 217.1044.

## 6. Transformation of products **3a** and **3e**

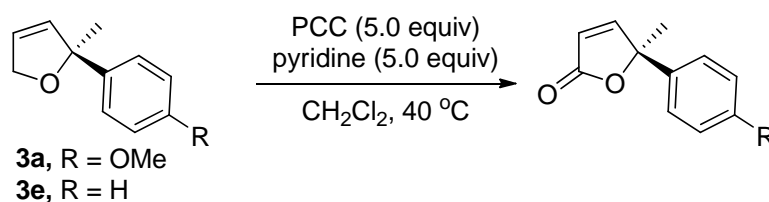

General experimental procedure for **3a** and **3e**: To a flame dried sealed tube were added **3a** (or **3e**) (0.2 mmol), pyridine (5.0 equiv), PCC (5.0 equiv), dichloromethane (1.0 mL). The resulting mixture was heated at 40 °C for 24 h. The reaction mixture was filtered through celite/silica gel = 1/1. After the volatile was removed in vacuo, the residue was purified by column chromatography with petroleum ether and ethyl acetate as eluent to furnish the products.

### (*S*)-5-(4-methoxyphenyl)-5-methylfuran-2(*5H*)-one (**5a**)

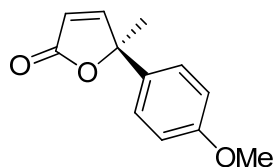

White solid, 33.8 mg, yield: 83%, ee: 94%, mp: 43-44 °C,  $[\alpha]_D^{25} = -255.5$  (*c* 1.0, CHCl<sub>3</sub>); Agilent 1260 SSC (Chiralpak AD-H, 4.6×250 mm, CO<sub>2</sub>/*i*-Propanol = 9/1, 1.3 mL/min, 214 nm), *t<sub>R</sub>* = 7.69 min (minor), 8.34 min (major); <sup>1</sup>H NMR (400 MHz, CDCl<sub>3</sub>) δ 7.60 (d, *J* = 5.6 Hz, 1H), 7.28 (d, *J* = 8.8 Hz, 2H), 6.88 (d, *J* = 8.8 Hz, 2H), 6.04 (d, *J* = 5.2 Hz, 2H), 3.79 (s, 3H), 1.80 (s, 3H); <sup>13</sup>C NMR (101M, CDCl<sub>3</sub>) δ 172.5, 160.6, 159.5, 131.0, 126.2, 119.1, 114.1, 88.8, 55.3, 26.1; IR (film) 3099, 1745, 1509, 1250, 829 cm<sup>-1</sup>; MS (EI) *m/z*: 63 (25), 77 (42), 92 (25), 115 (23), 133 (51), 161 (100), 189 (83), 204 (M<sup>+</sup>, 29); HRMS (EI) Calcd for C<sub>12</sub>H<sub>12</sub>O<sub>3</sub>: 204.0786, found: 204.0784.

### (*S*)-5-methyl-5-phenylfuran-2(*5H*)-one (**5b**)<sup>3</sup>

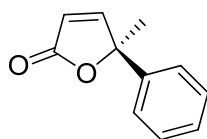

Colorless oil, 28.3 mg, yield: 87%, ee: 94%,  $[\alpha]_D^{25} = -245.4$  (*c* 1.0, CHCl<sub>3</sub>); Agilent

1260 SSC (Chiralpak OD-H, 4.6×250 mm, CO<sub>2</sub>/*i*-Propanol = 99/1, 1.3 mL/min, 214 nm),  $t_R$  = 6.30 min (major), 7.18 min (minor); <sup>1</sup>H NMR (400 MHz, CDCl<sub>3</sub>) δ 7.64 (d, *J* = 6.0 Hz, 1H), 7.38-7.30 (m, 4H), 6.04 (d, *J* = 5.6 Hz, 1H), 1.82 (s, 3H); <sup>13</sup>C NMR (101 MHz, CDCl<sub>3</sub>) δ 172.4, 160.5, 139.2, 128.8, 128.4, 124.8, 119.3, 88.9, 26.3; MS (EI) *m/z*: 77 (41), 103 (39), 115 (10), 131 (100), 145 (1), 159 (54), 174 (M<sup>+</sup>, 20).

## 7. Pd-catalyzed Asymmetric Heck reaction of 5-methyl-2,3-dihydrofuran (**1a**) and triflate **2a** on 2.0 mmol scale

To a flame dried sealed tube were added Pd(dba)<sub>2</sub> (69.0 mg, 0.12 mmol), (*R*)-SDP(O) (145.1 mg, 0.24 mmol), freshly distilled anhydrous THF (2.0 mL). The resulting mixture was allowed to stir for 30 mins. The 5-methyl-2,3-dihydrofuran (**1a**) (672 mg, 8.0 mmol) and triflate **2a** (512 mg, 2.0 mmol) were added subsequently, then dicyclohexylmethylamine (1.17 g, 6.0 mmol) was added. The resulting reaction mixture was stirred at 110 °C for 24 h. The reaction mixture was filtered through a celite, the ratio of **3a** and **4a** was determined to be >99/1 by GC. After the volatile was removed in vacuo, the resulting residue was purified by flash chromatography (FC) on silica gel with petroleum ether and ethyl acetate as eluent to give the product **3a** in 88% yield (334.3 mg) with 95% ee.

## 8. Reference

- [1] T. D. Lee and G. D. Daves, *J. Org. Chem.*, 1983, **48**, 399.
- [2] Y. Wang, K. Zheng and R. Hong, *J. Am. Chem. Soc.*, 2012, **134**, 4096.
- [3] (a) K. Suzuki and K. Inomata, *Tetrahedron Letters*, 2003, **44**, 745; (b) C. Gaul, K. Schäfer and D. Seebach, *J. Org. Chem.*, 2001, **66**, 3059.

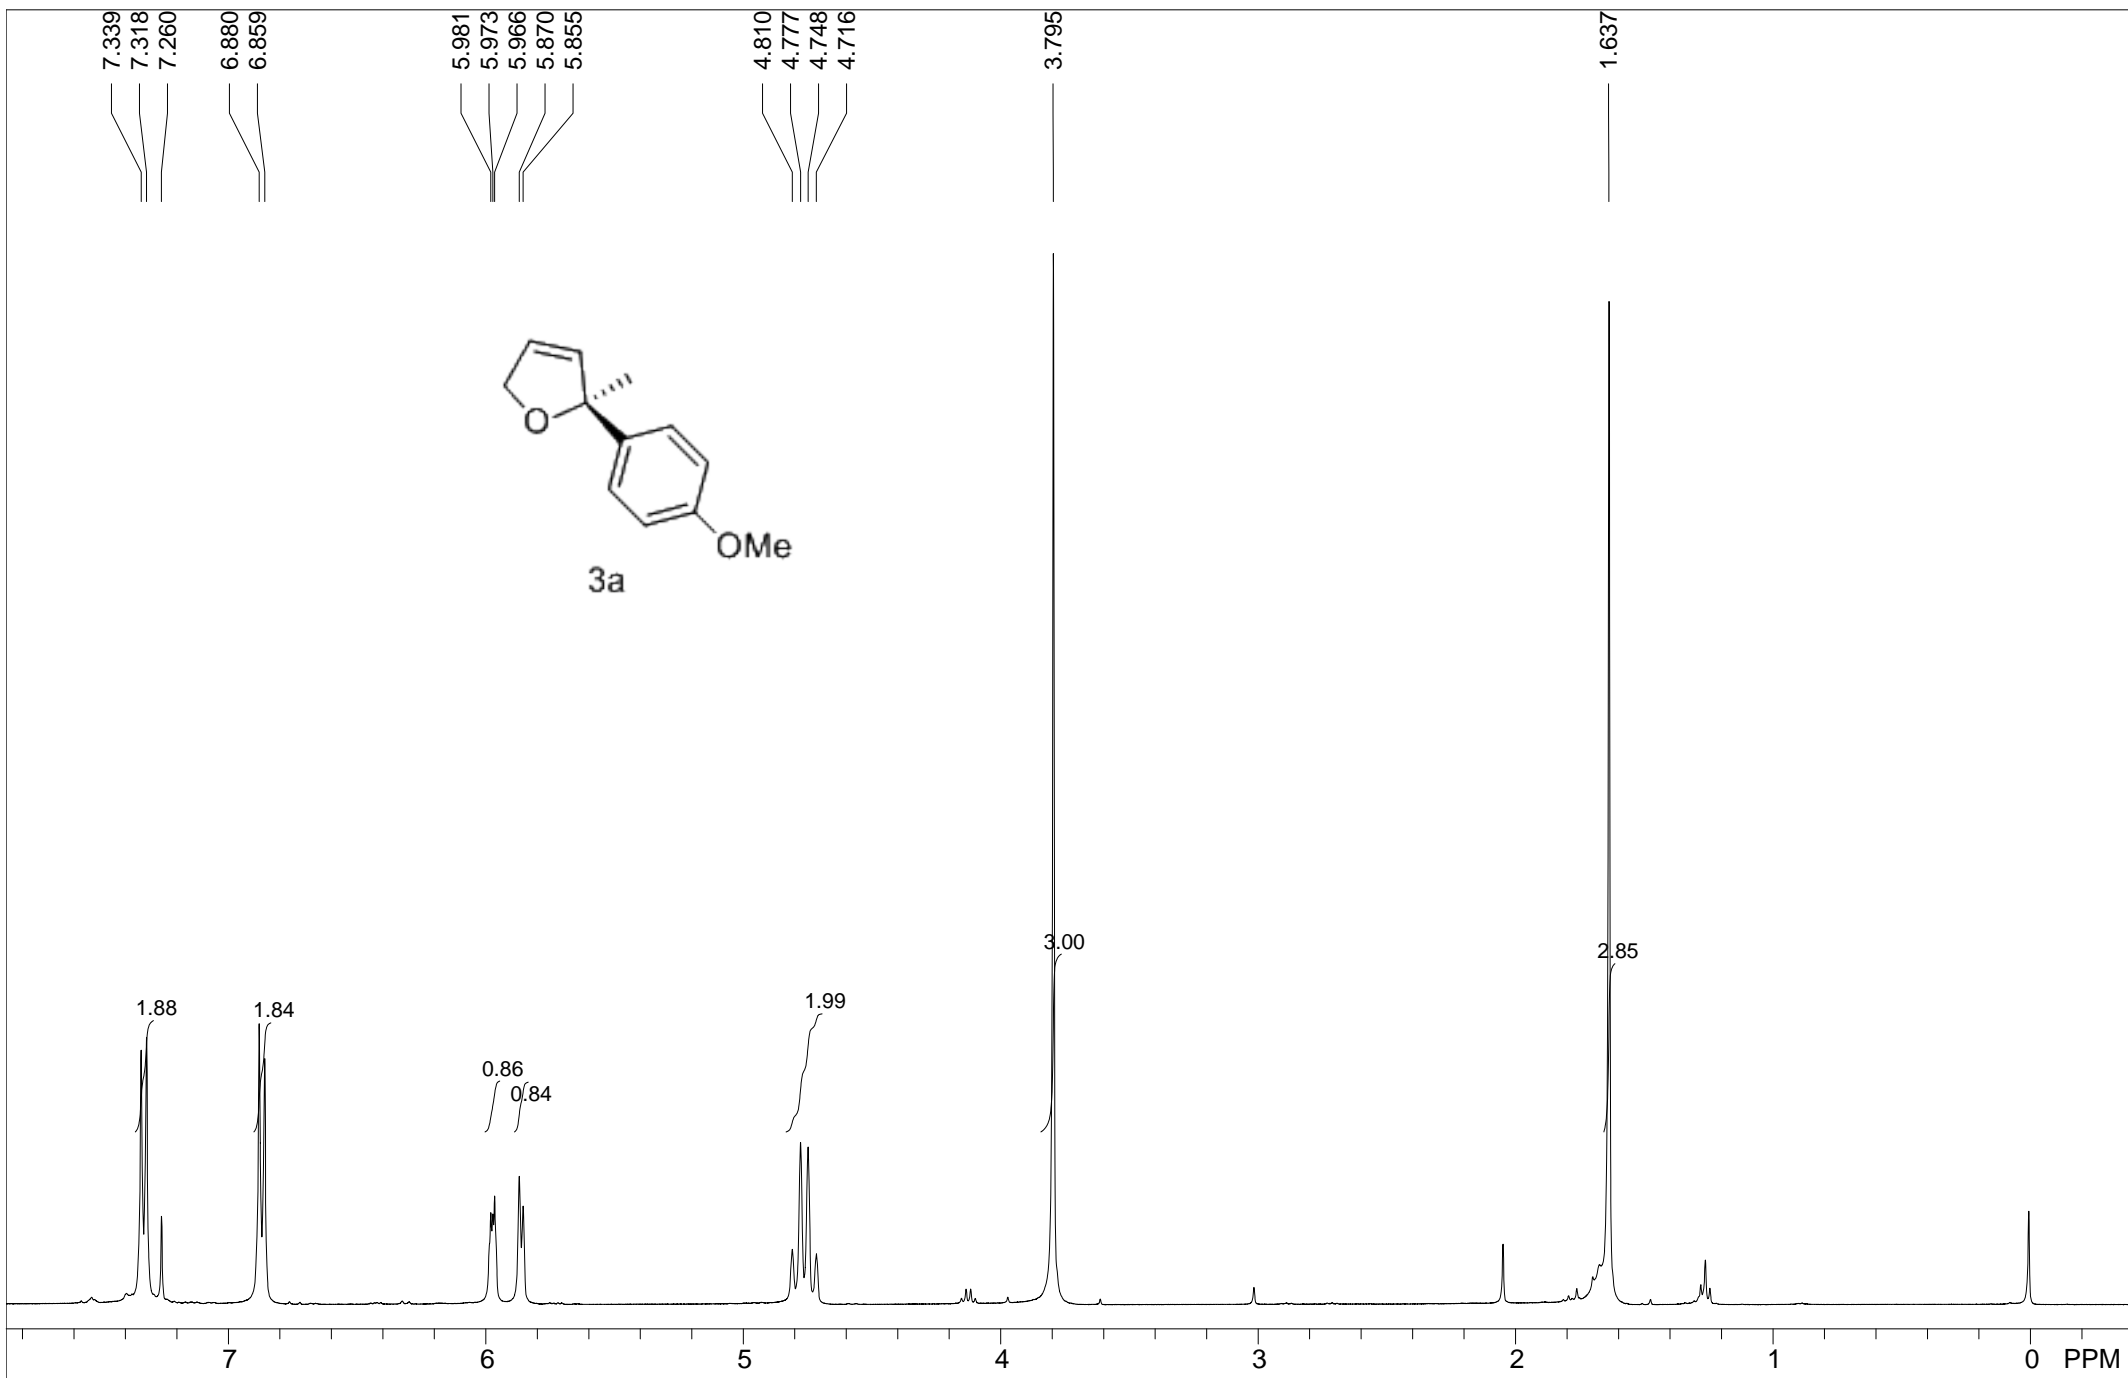

Std proton:blank line

USER: -- DATE: Oct 28 2014

|             |             |             |             |                      |
|-------------|-------------|-------------|-------------|----------------------|
| F1: 400.032 | F2: 100.597 | SW1: 7225   | OF1: 2806.6 | PTS1d: 21676 , 32768 |
| EX: s2pul   | PW: 10.6 us | PD: 1.0 sec | NA: 8       | LB: 0.0              |

Nuts - \$4-19-01-HNMR.fid



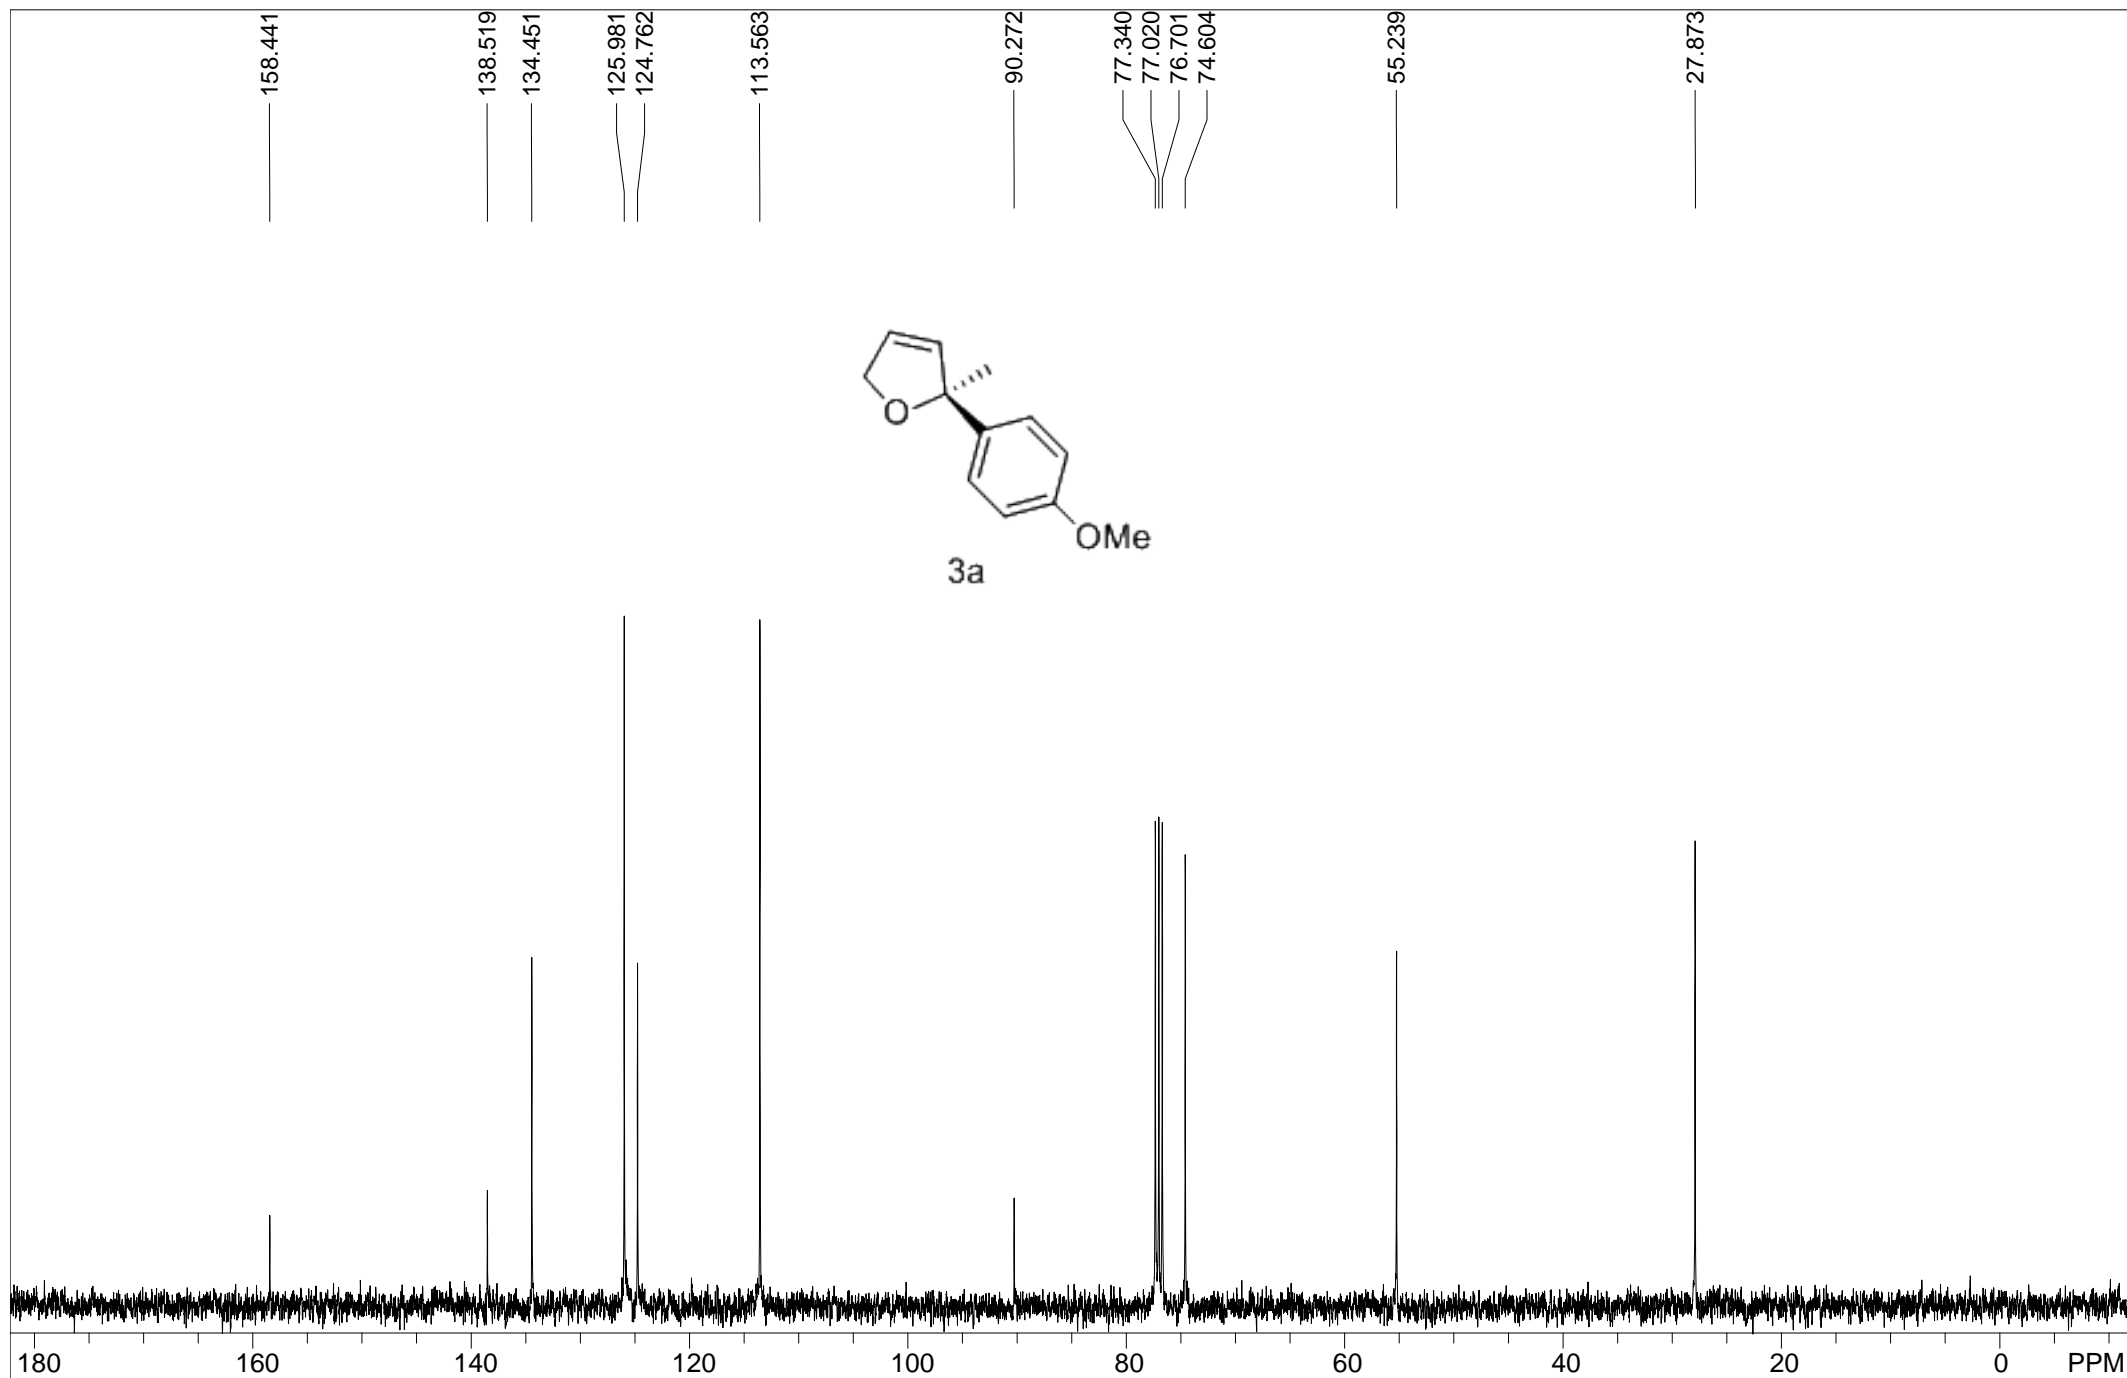

Std carbon:blank line

USER: -- DATE: Oct 28 2014

|             |             |            |             |              |         |                           |
|-------------|-------------|------------|-------------|--------------|---------|---------------------------|
| F1: 100.598 | F2: 400.031 | SW1: 24510 |             | OF1: 10561.6 |         | PTS1d: 31875 , 32768      |
| EX: s2pul   |             | PW: 4.1 us | PD: 1.0 sec | NA: 80       | LB: 2.0 | Nuts - \$4-19-01-CNMR.fid |

# ==== Shimadzu LCsolution Analysis Report ====

D:\LabSolutions\Data\Project1\ZQS\4-81-01.lcd

Acquired by : Admin  
 Sample Name : 4-81-01  
 Sample ID : OD-H,99.5/0.5,1.0,214  
 Vail # : 0  
 Injection Volume : 10 uL  
 Data File Name : 4-81-01.lcd  
 Method File Name : 1234.lcm  
 Batch File Name :  
 Report File Name : Default.lcr  
 Data Acquired : 2013-12-3 16:24:05  
 Data Processed : 2013-12-8 22:21:53

## <Chromatogram>

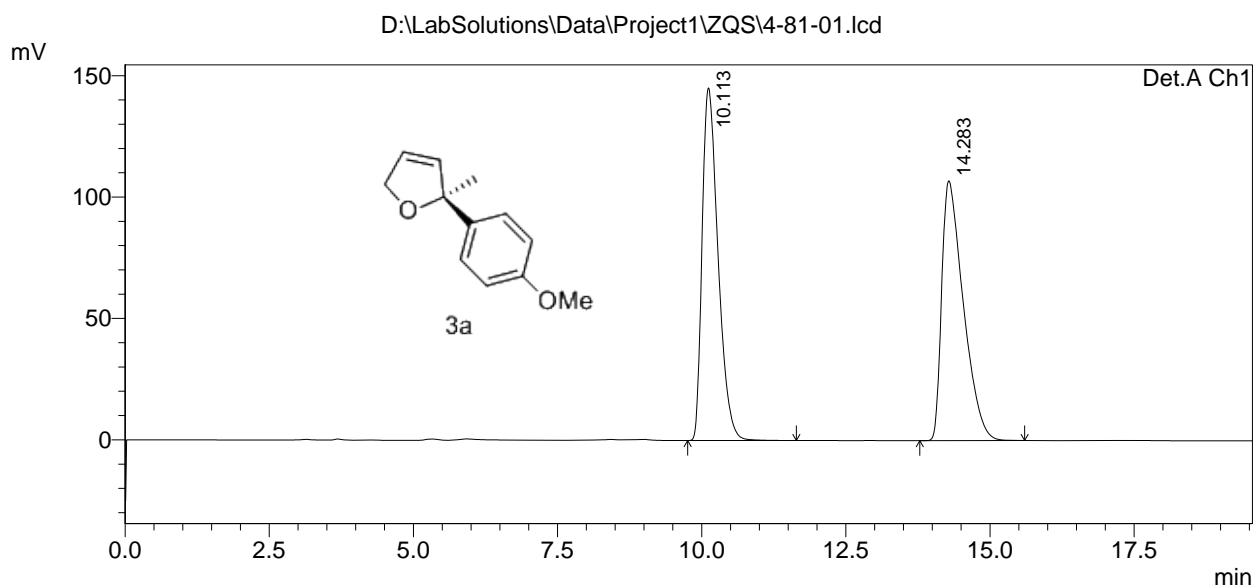

1 Det.A Ch1/214nm

PeakTable

Detector A Ch1 214nm

| Peak# | Ret. Time | Area    | Height | Area %  |
|-------|-----------|---------|--------|---------|
| 1     | 10.113    | 2791815 | 145262 | 50.078  |
| 2     | 14.283    | 2783108 | 106956 | 49.922  |
| Total |           | 5574922 | 252219 | 100.000 |

# ==== Shimadzu LCsolution Analysis Report ====

D:\LabSolutions\Data\Project1\ZQS\4-76-01.lcd

Acquired by : Admin  
 Sample Name : 4-76-01  
 Sample ID : OD-H,99.5/0.5,1.0,214  
 Vial # : 0  
 Injection Volume : 10 uL  
 Data File Name : 4-76-01.lcd  
 Method File Name : 1234.lcm  
 Batch File Name :  
 Report File Name : Default.lcr  
 Data Acquired : 2014-11-18 20:25:15  
 Data Processed : 2014-11-18 20:45:47

## <Chromatogram>

D:\LabSolutions\Data\Project1\ZQS\4-76-01.lcd

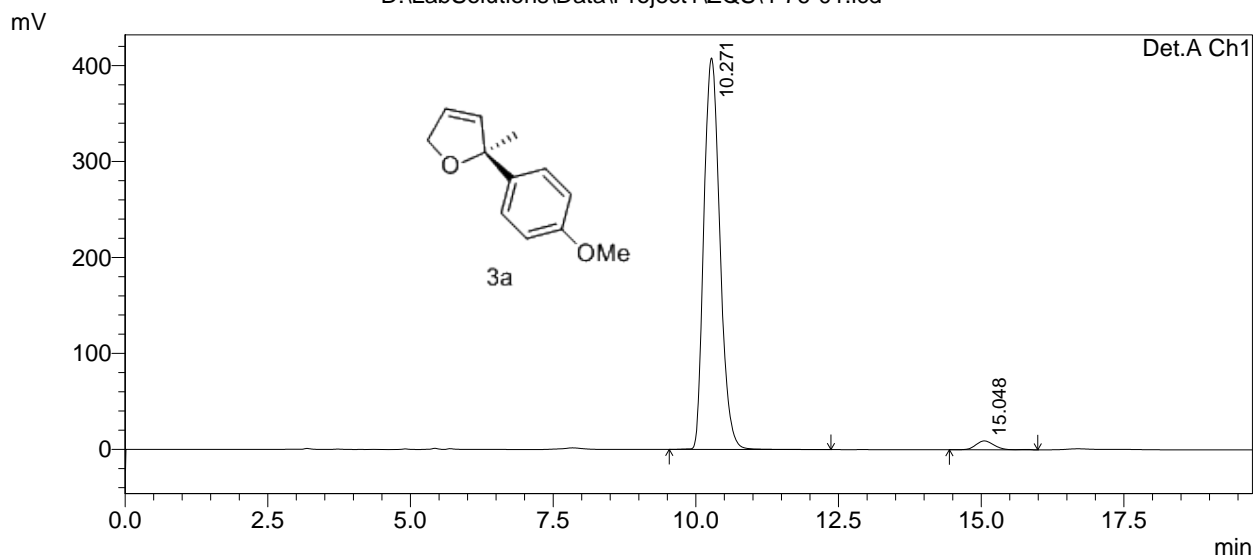

PeakTable

Detector A Ch1 214nm

| Peak# | Ret. Time | Area    | Height | Area %  |
|-------|-----------|---------|--------|---------|
| 1     | 10.271    | 7987289 | 408164 | 97.522  |
| 2     | 15.048    | 202943  | 9243   | 2.478   |
| Total |           | 8190232 | 417407 | 100.000 |

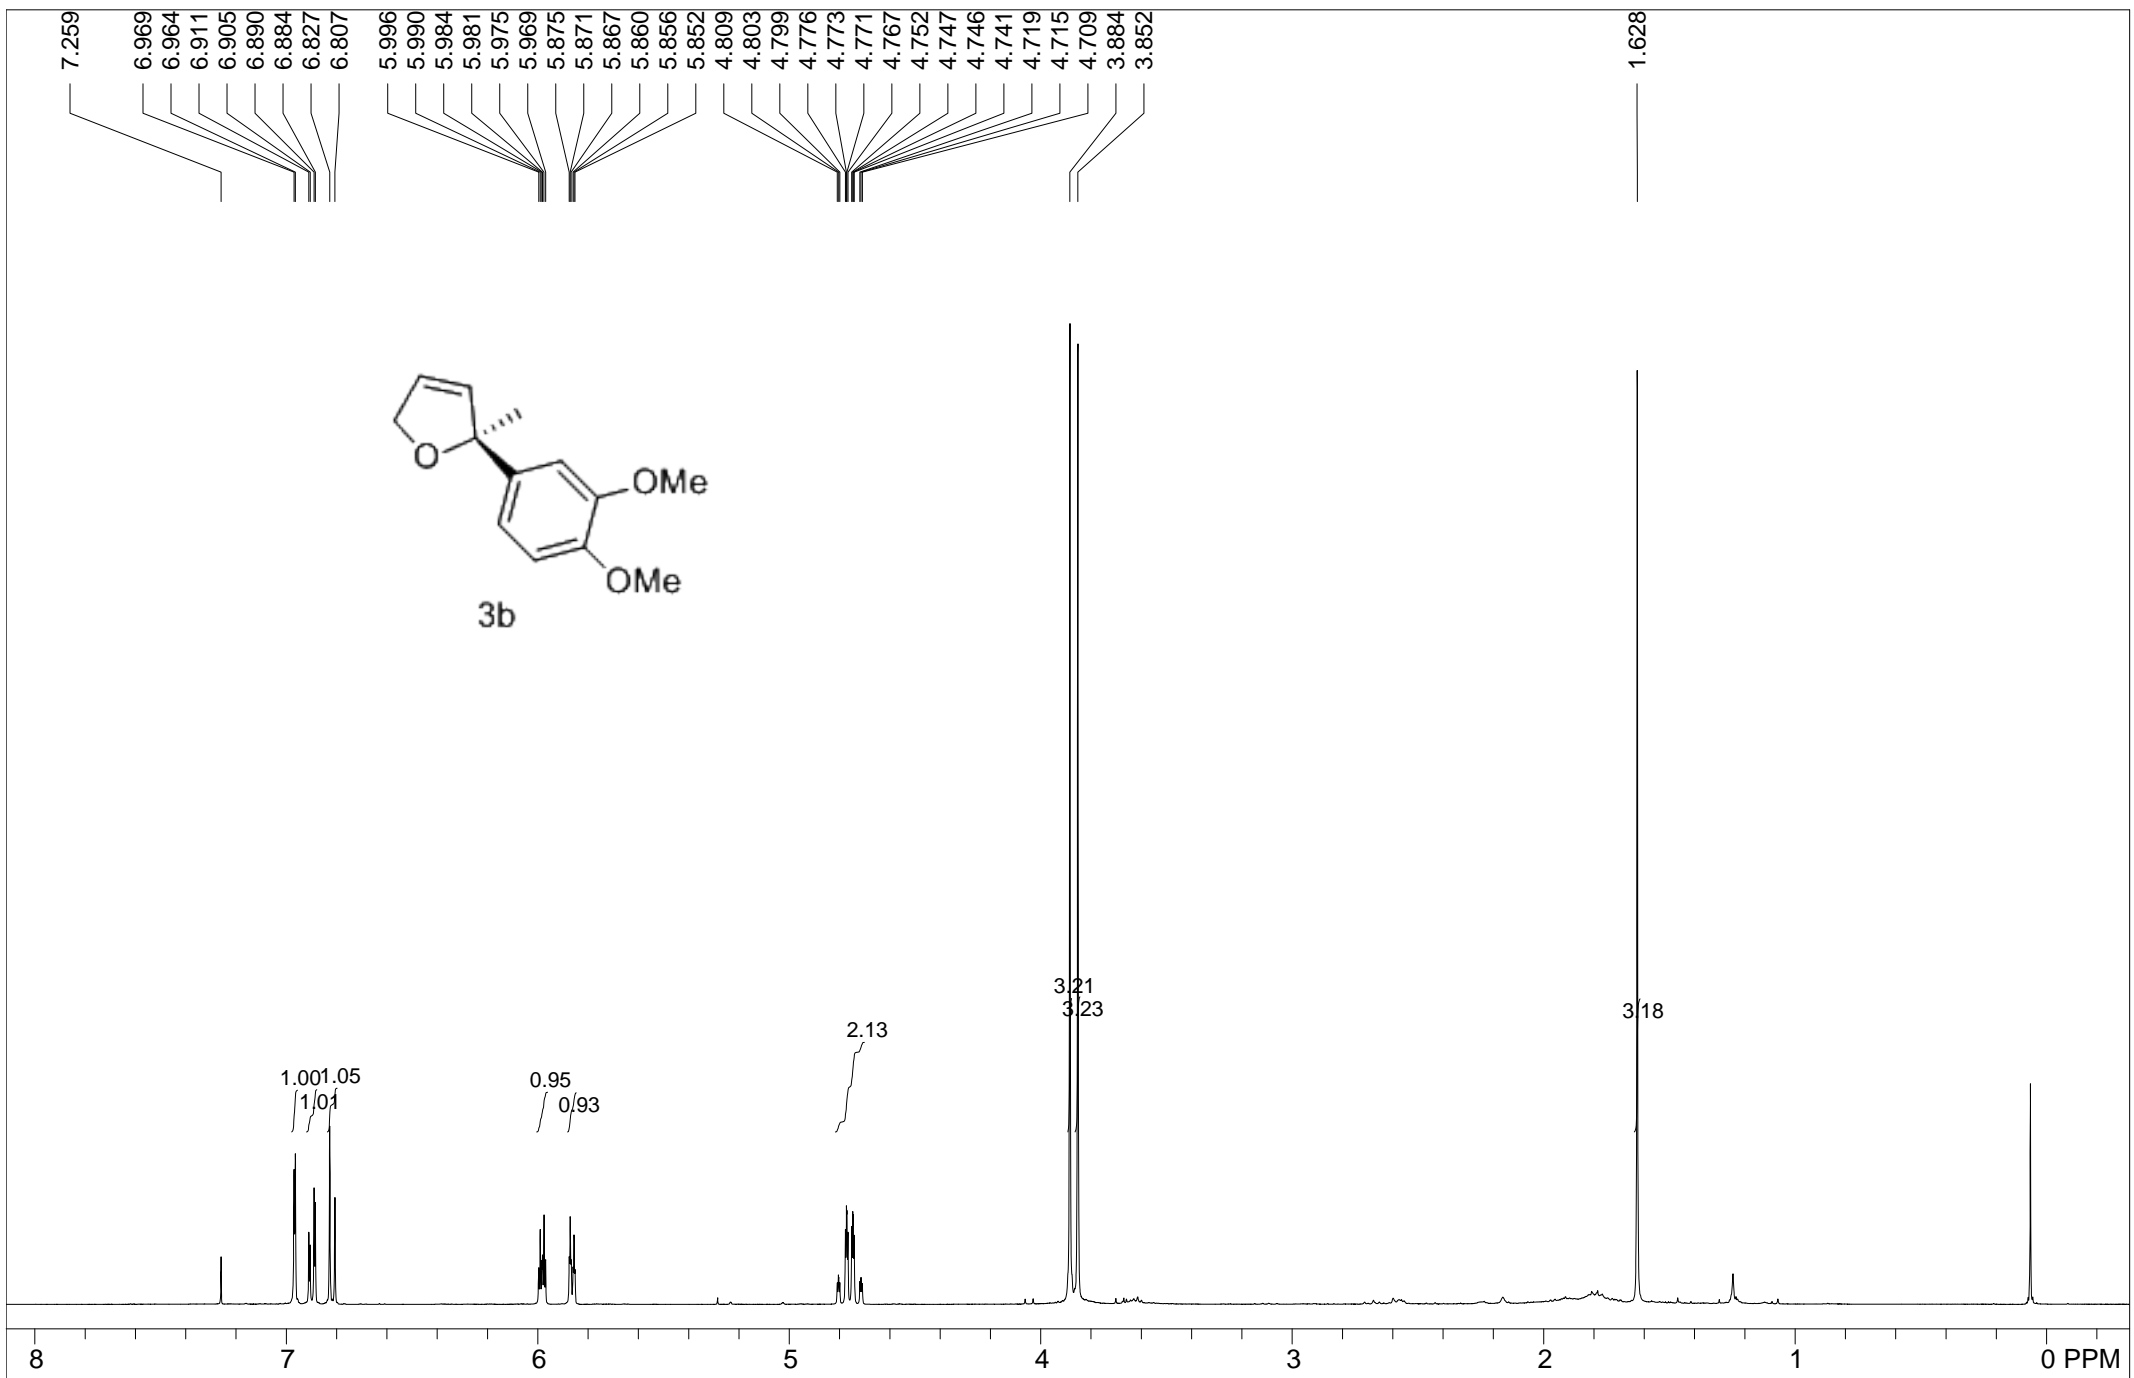

|             |             |             |  |                            |         |                           |  |
|-------------|-------------|-------------|--|----------------------------|---------|---------------------------|--|
| :blank line |             |             |  | USER: -- DATE: Nov 25 2014 |         |                           |  |
| F1: 399.723 | F2: 100.519 | SW1: 7184   |  | OF1: 2798.4                |         | PTS1d: 21552 , 32768      |  |
| EX: s2pul   | PW: 4.4 us  | PD: 1.0 sec |  | NA: 20                     | LB: 0.0 | Nuts - \$4-83-01-HNMR.fid |  |

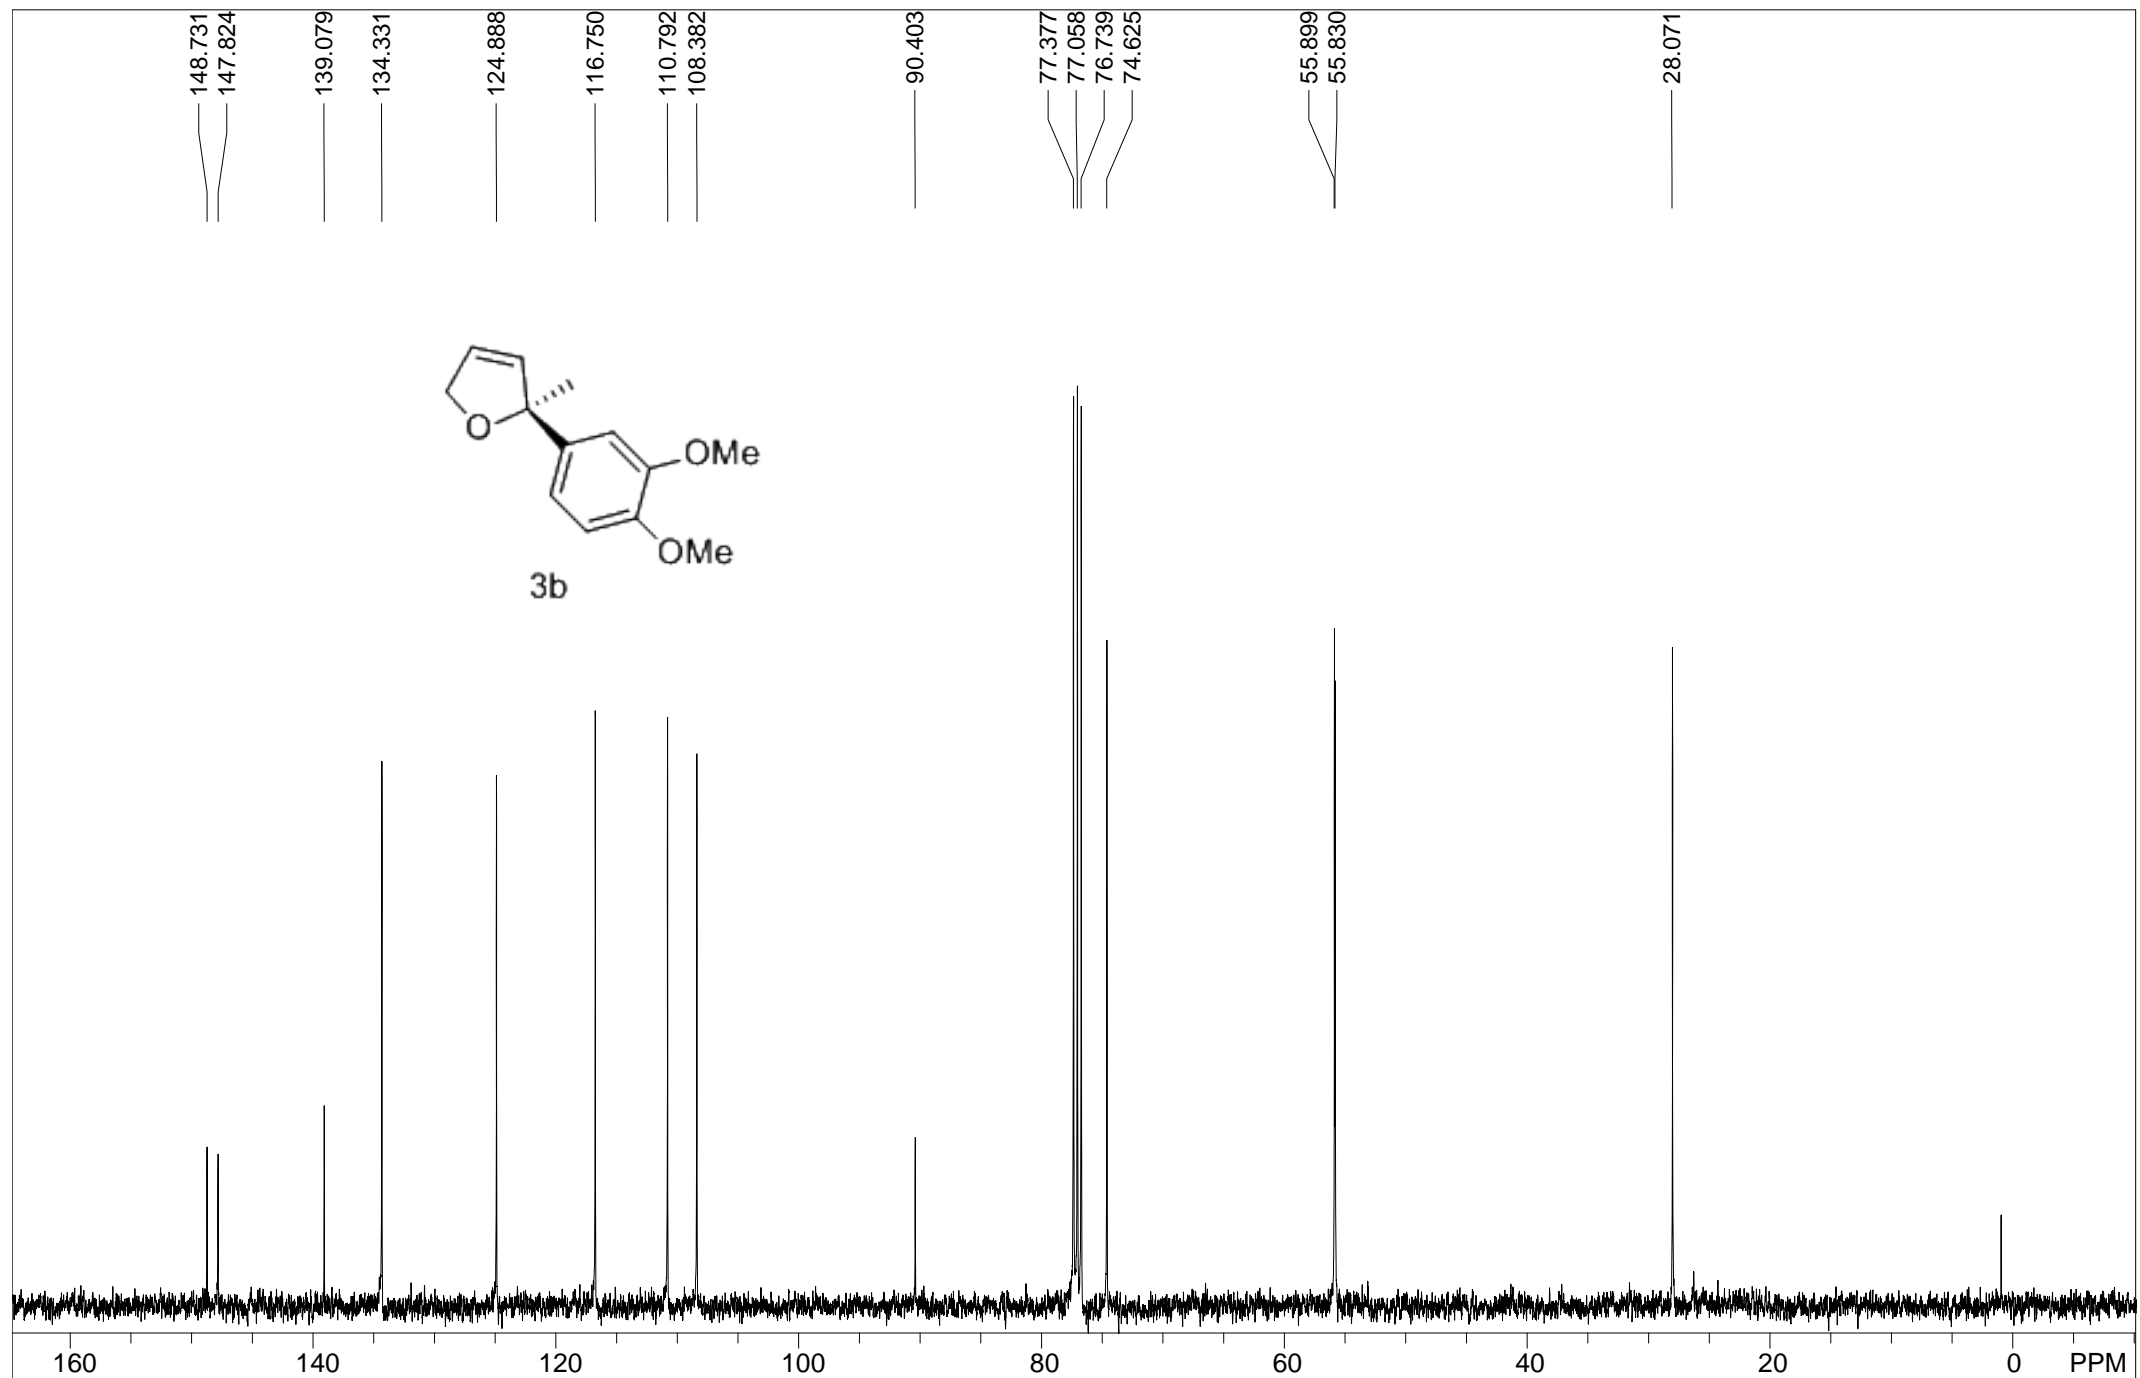

|             |             |             |  |                            |         |                           |  |
|-------------|-------------|-------------|--|----------------------------|---------|---------------------------|--|
| :blank line |             |             |  | USER: -- DATE: Nov 25 2014 |         |                           |  |
| F1: 100.521 | F2: 399.722 | SW1: 25000  |  | OF1: 11056.1               |         | PTS1d: 37500 , 65536      |  |
| EX: s2pul   | PW: 4.9 us  | PD: 1.0 sec |  | NA: 200                    | LB: 2.0 | Nuts - \$4-83-01-CNMR.fid |  |

# ==== Shimadzu LcSolution Analysis Report ====

D:\LabSolutions\Data\Project1\ZQS\4-83-XXT.lcd

Acquired by : Admin  
 Sample Name : 4-83-XXT  
 Sample ID : OD-H,95.0/5.0,1.0,214  
 Vial # : 0  
 Injection Volume : 10 uL  
 Data File Name : 4-83-XXT.lcd  
 Method File Name : 1234.lcm  
 Batch File Name :  
 Report File Name : Default.lcr  
 Data Acquired : 2013-11-24 0:05:28  
 Data Processed : 2013-11-24 0:26:38

## <Chromatogram>

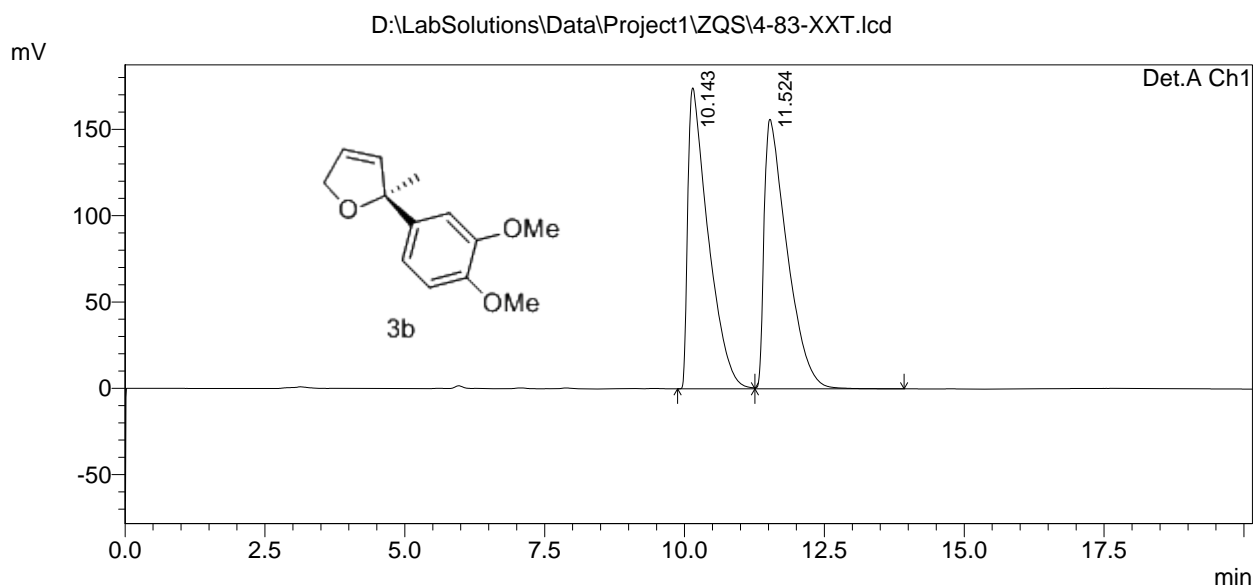

PeakTable

Detector A Ch1 214nm

| Peak# | Ret. Time | Area    | Height | Area %  |
|-------|-----------|---------|--------|---------|
| 1     | 10.143    | 4432953 | 174346 | 49.865  |
| 2     | 11.524    | 4457026 | 156120 | 50.135  |
| Total |           | 8889979 | 330467 | 100.000 |

# ==== Shimadzu LCsolution Analysis Report ====

D:\LabSolutions\Data\Project1\ZQS\4-83-01.lcd

Acquired by : Admin  
 Sample Name : 4-83-01  
 Sample ID : OD-H,95.0/5.0,1.0,214  
 Vial # : 0  
 Injection Volume : 10 uL  
 Data File Name : 4-83-01.lcd  
 Method File Name : 1234.lcm  
 Batch File Name :  
 Report File Name : Default.lcr  
 Data Acquired : 2013-11-24 0:33:48  
 Data Processed : 2013-11-24 0:50:53

## <Chromatogram>

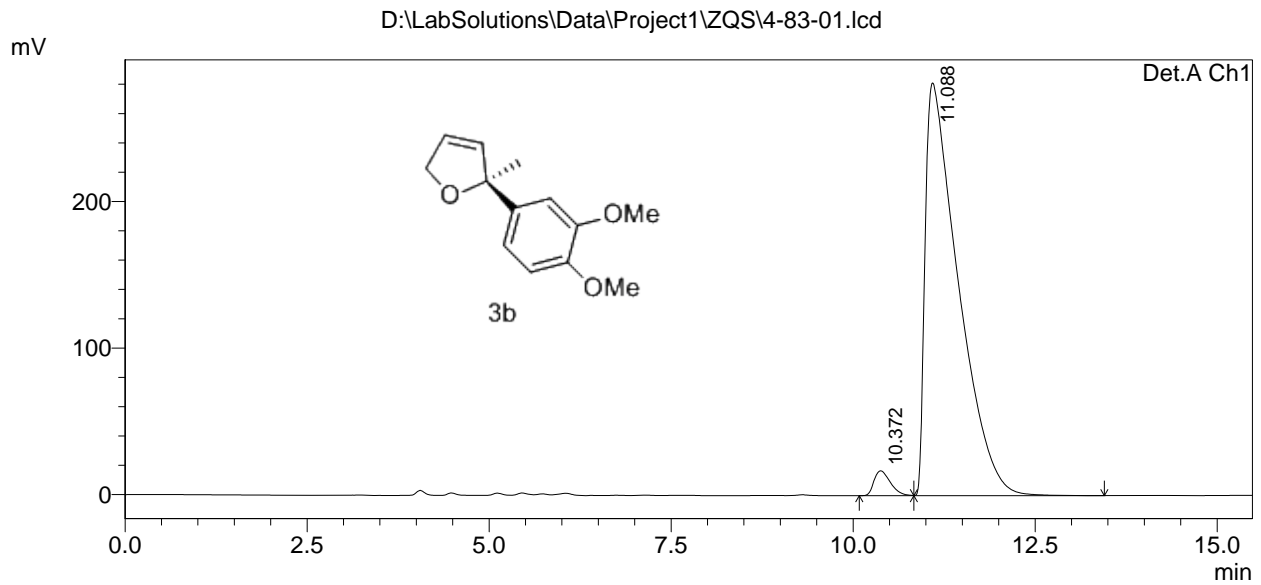

1 Det.A Ch1/214nm

PeakTable

Detector A Ch1 214nm

| Peak# | Ret. Time | Area    | Height | Area %  |
|-------|-----------|---------|--------|---------|
| 1     | 10.372    | 264235  | 17056  | 2.888   |
| 2     | 11.088    | 8884760 | 281643 | 97.112  |
| Total |           | 9148995 | 298699 | 100.000 |

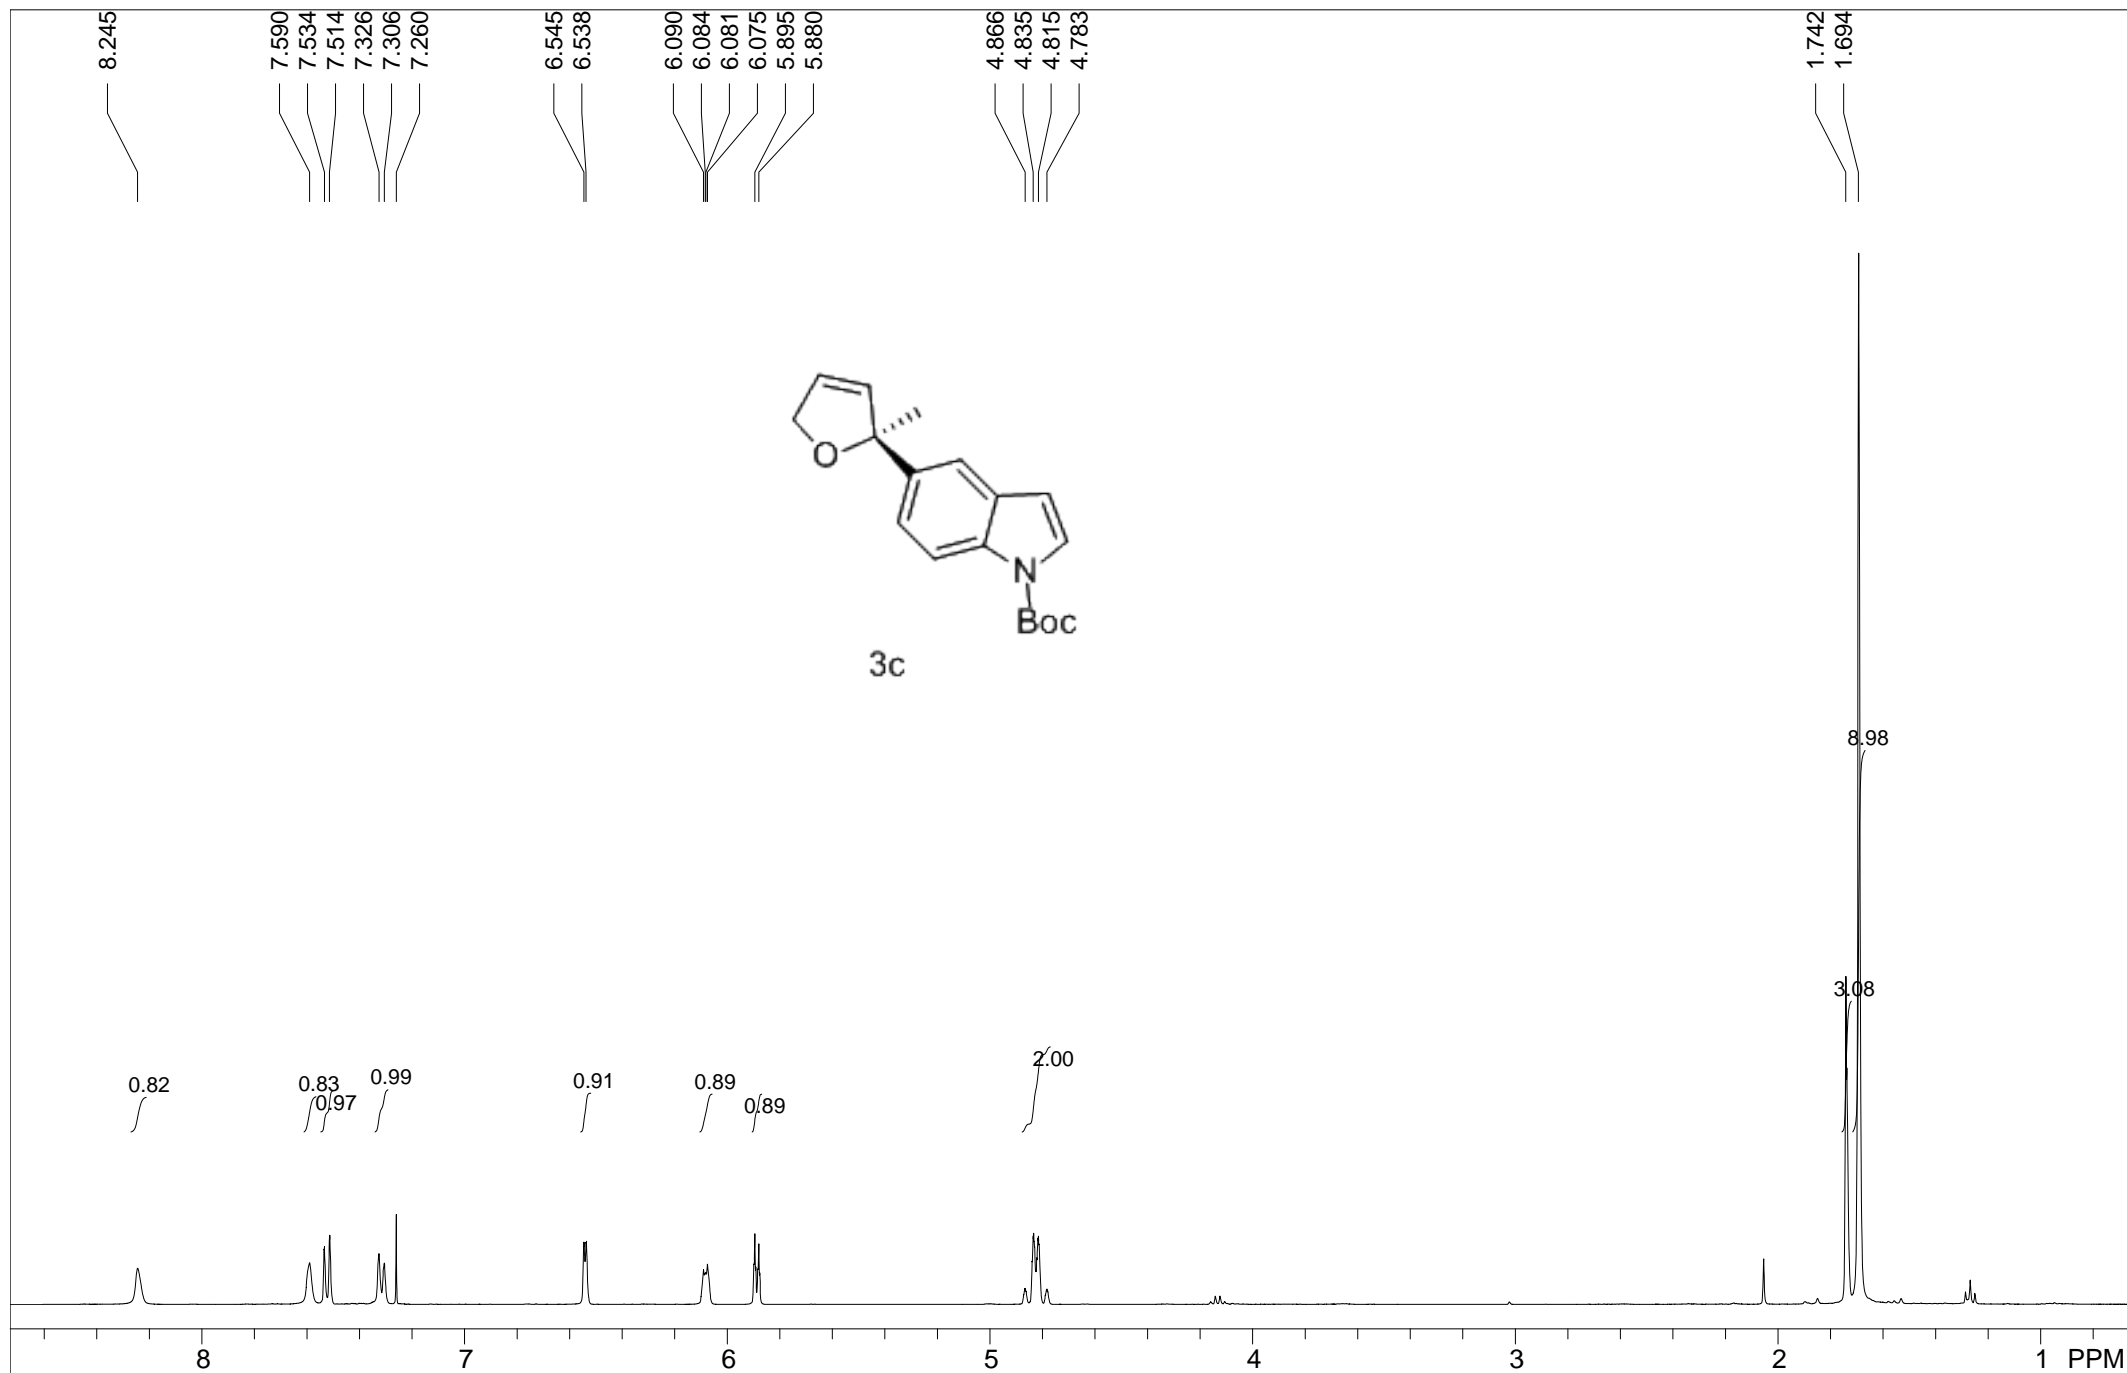

|             |             |             |  |                            |         |                           |  |
|-------------|-------------|-------------|--|----------------------------|---------|---------------------------|--|
| :blank line |             |             |  | USER: -- DATE: Nov 28 2014 |         |                           |  |
| F1: 399.722 | F2: 100.519 | SW1: 6410   |  | OF1: 2398.9                |         | PTS1d: 19231 , 32768      |  |
| EX: s2pul   | PW: 4.4 us  | PD: 1.0 sec |  | NA: 12                     | LB: 0.0 | Nuts - \$4-90-01-HNMR.fid |  |



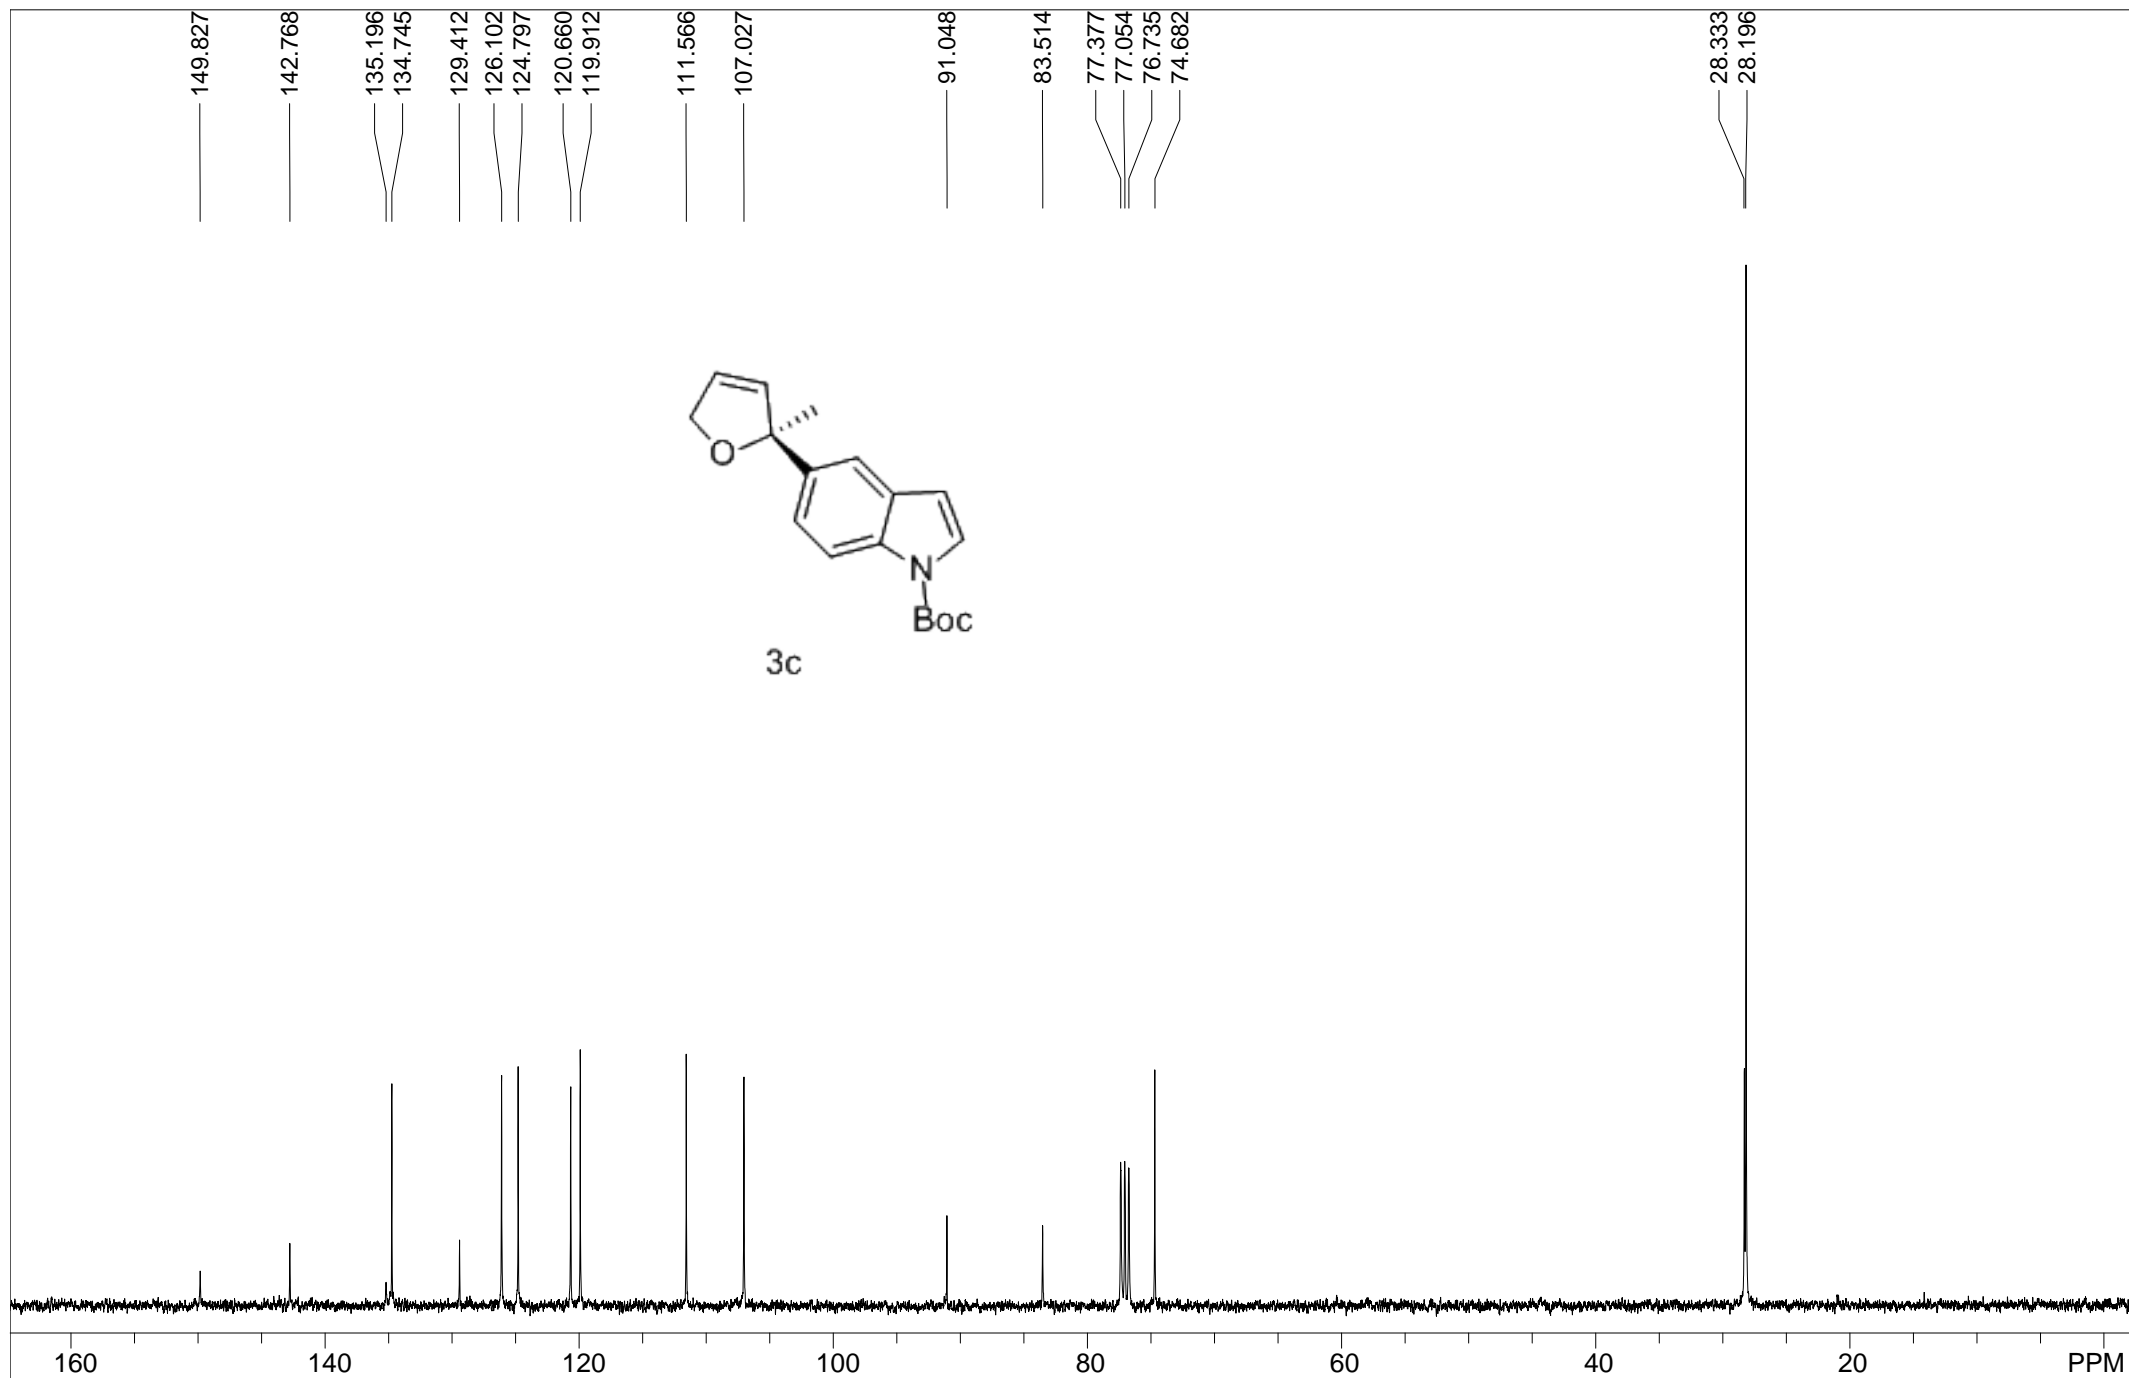

|             |             |            |             |                            |         |                           |  |
|-------------|-------------|------------|-------------|----------------------------|---------|---------------------------|--|
| :blank line |             |            |             | USER: -- DATE: Nov 28 2014 |         |                           |  |
| F1: 100.521 | F2: 399.722 | SW1: 25000 |             | OF1: 11056.1               |         | PTS1d: 37500 , 65536      |  |
| EX: s2pul   |             | PW: 4.9 us | PD: 1.0 sec | NA: 120                    | LB: 2.0 | Nuts - \$4-90-01-CNMR.fid |  |

# ==== Shimadzu LCsolution Analysis Report ====

D:\LabSolutions\Data\Project1\ZQS\4-90-01.lcd

Acquired by : Admin  
 Sample Name : 4-90-01  
 Sample ID : OD-H,99.5/0.5,1.0,214  
 Vial # : 0  
 Injection Volume : 10 uL  
 Data File Name : 4-90-01.lcd  
 Method File Name : 1234.lcm  
 Batch File Name :  
 Report File Name : Default.lcr  
 Data Acquired : 2013-11-29 21:57:25  
 Data Processed : 2013-11-29 22:10:19

## <Chromatogram>

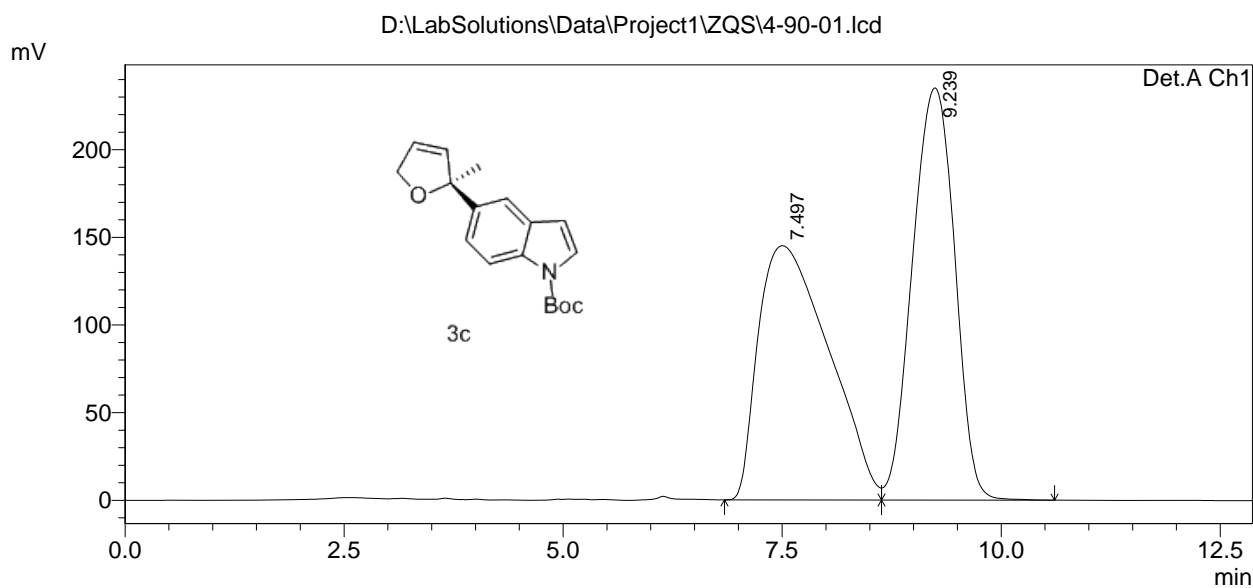

PeakTable

Detector A Ch1 214nm

| Peak# | Ret. Time | Area     | Height | Area %  |
|-------|-----------|----------|--------|---------|
| 1     | 7.497     | 8119131  | 145099 | 50.661  |
| 2     | 9.239     | 7907272  | 235144 | 49.339  |
| Total |           | 16026403 | 380243 | 100.000 |

# ==== Shimadzu LCsolution Analysis Report ====

D:\LabSolutions\Data\Project1\ZQS\5-5-01.lcd

Acquired by : Admin  
 Sample Name : 5-5-01  
 Sample ID : OD-H,99.5/0.5,1.0,214  
 Vail # : 0  
 Injection Volume : 10 uL  
 Data File Name : 5-5-01.lcd  
 Method File Name : 1234.lcm  
 Batch File Name :  
 Report File Name : Default.lcr  
 Data Acquired : 2013-11-29 21:43:48  
 Data Processed : 2013-11-29 21:56:24

## <Chromatogram>

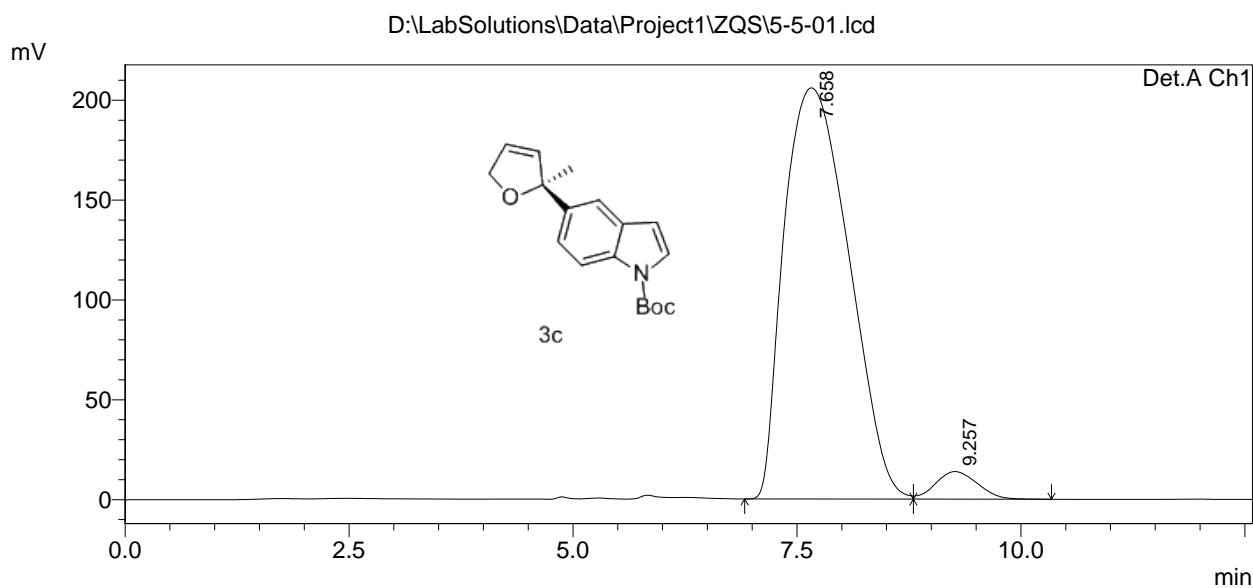

PeakTable

Detector A Ch1 214nm

| Peak# | Ret. Time | Area     | Height | Area %  |
|-------|-----------|----------|--------|---------|
| 1     | 7.658     | 10372978 | 205877 | 95.857  |
| 2     | 9.257     | 448284   | 13765  | 4.143   |
| Total |           | 10821262 | 219642 | 100.000 |

7.888 7.862 7.858 7.842 7.820 7.540 7.536 7.518 7.514 7.501 7.498 7.485 7.480 7.474 7.468 7.461 7.455 7.451 7.438 7.434 7.260 6.126 6.120 6.113 6.111 6.104 6.099 5.934 5.930 5.926 5.919 5.915 5.912 4.908 4.904 4.899 4.876 4.871 4.866 4.849 4.845 4.839 4.816 4.812 4.810 4.807 1.758

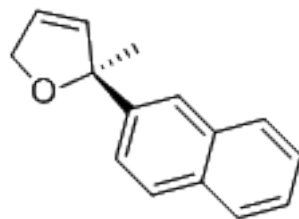

3d

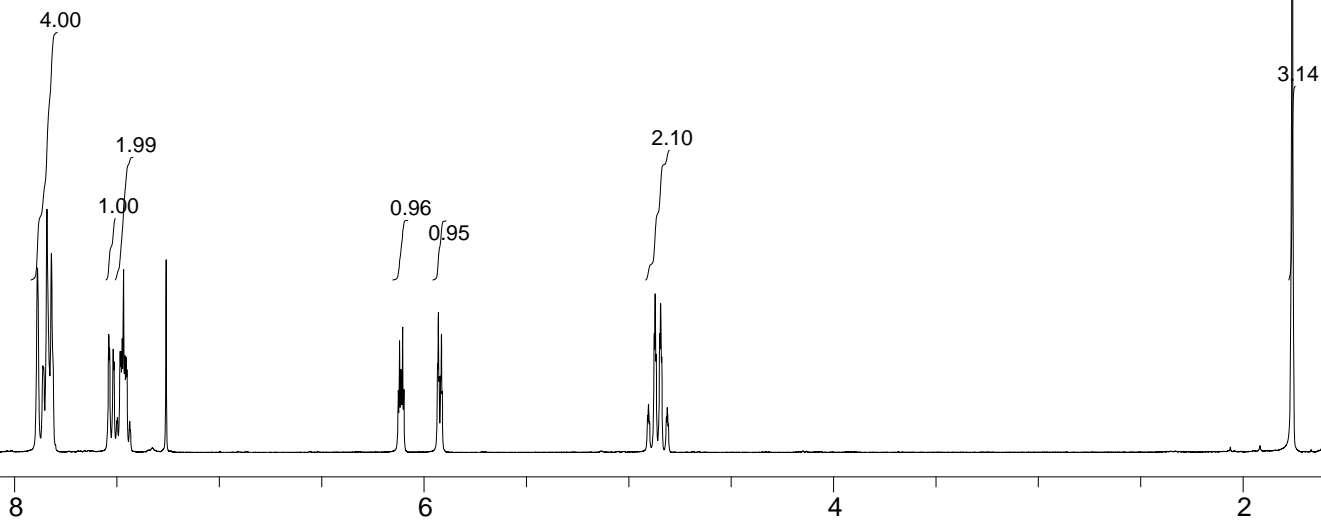

|             |             |             |  |                            |         |                          |  |
|-------------|-------------|-------------|--|----------------------------|---------|--------------------------|--|
| :blank line |             |             |  | USER: -- DATE: Nov 28 2014 |         |                          |  |
| F1: 399.722 | F2: 100.519 | SW1: 6410   |  | OF1: 2398.9                |         | PTS1d: 19231 , 32768     |  |
| EX: s2pul   | PW: 4.4 us  | PD: 1.0 sec |  | NA: 4                      | LB: 0.0 | Nuts - \$4-95-1-HNMR.fid |  |

143.770  
134.187  
133.287  
132.437  
128.129  
127.992  
127.526  
126.007  
125.658  
125.248  
123.730  
122.808

90.794

77.347  
77.028  
76.709  
74.823

28.124

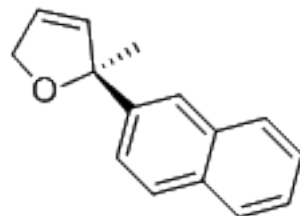

3d

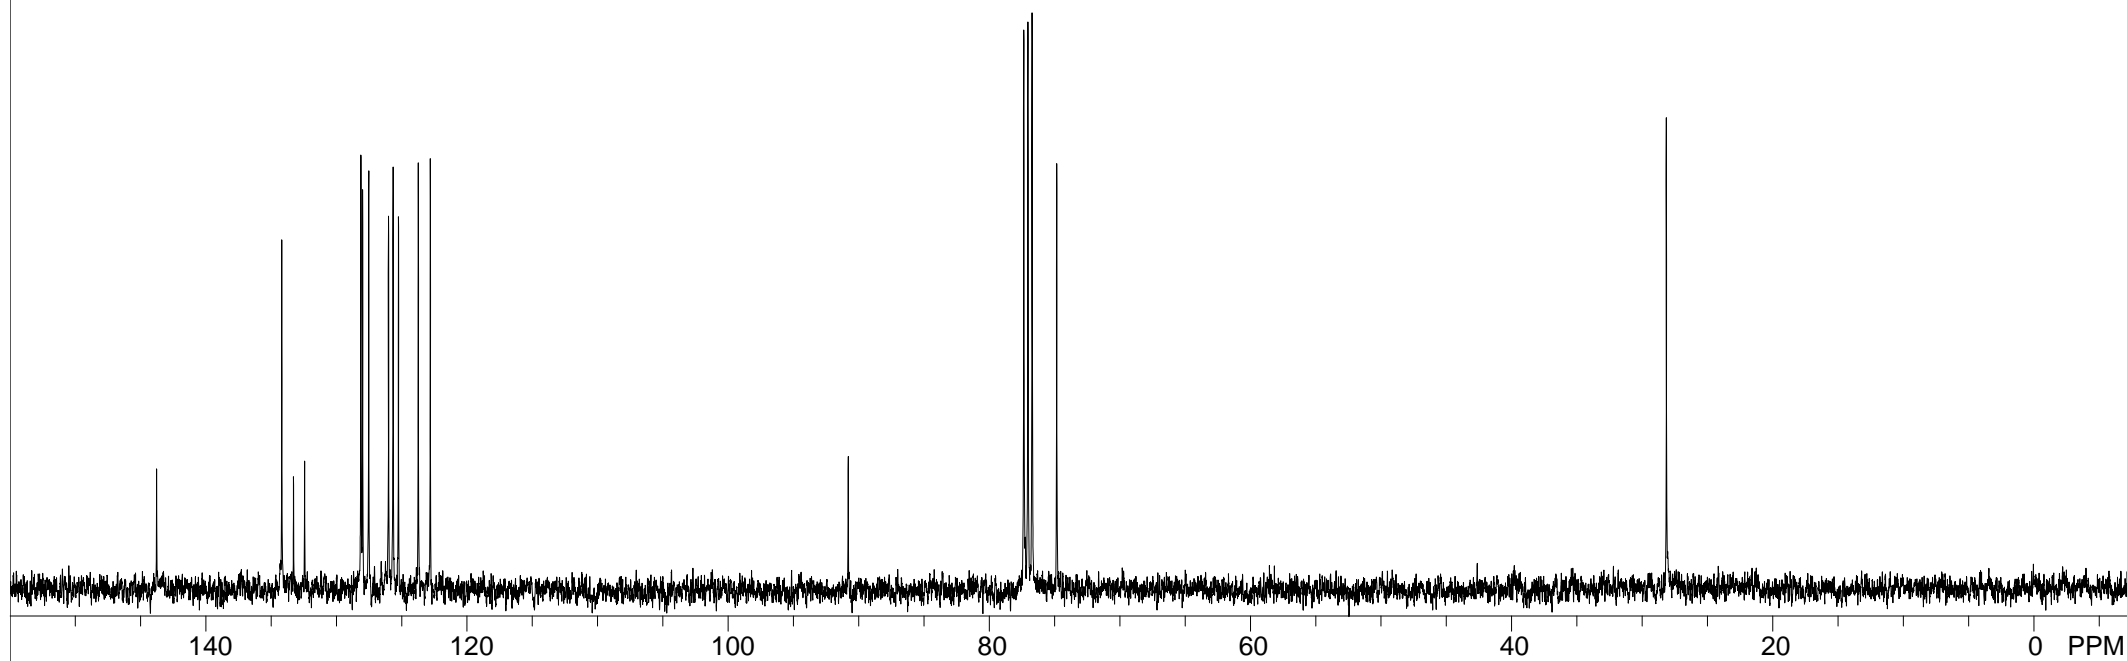

|             |             |             |  |                            |         |                          |  |
|-------------|-------------|-------------|--|----------------------------|---------|--------------------------|--|
| :blank line |             |             |  | USER: -- DATE: Nov 28 2014 |         |                          |  |
| F1: 100.521 | F2: 399.722 | SW1: 25000  |  | OF1: 11056.1               |         | PTS1d: 37500 , 65536     |  |
| EX: s2pul   | PW: 4.9 us  | PD: 1.0 sec |  | NA: 88                     | LB: 2.0 | Nuts - \$4-95-1-CNMR.fid |  |

# ==== Shimadzu LCsolution Analysis Report ====

D:\LabSolutions\Data\Project1\ZQS\4-95-01.lcd

Acquired by : Admin  
 Sample Name : 4-95-01  
 Sample ID : OD-H,99.5/0.5,1.0,214  
 Vail # : 0  
 Injection Volume : 10 uL  
 Data File Name : 4-95-01.lcd  
 Method File Name : 1234.lcm  
 Batch File Name :  
 Report File Name : Default.lcr  
 Data Acquired : 2013-11-29 22:55:51  
 Data Processed : 2013-11-29 23:13:13

## <Chromatogram>

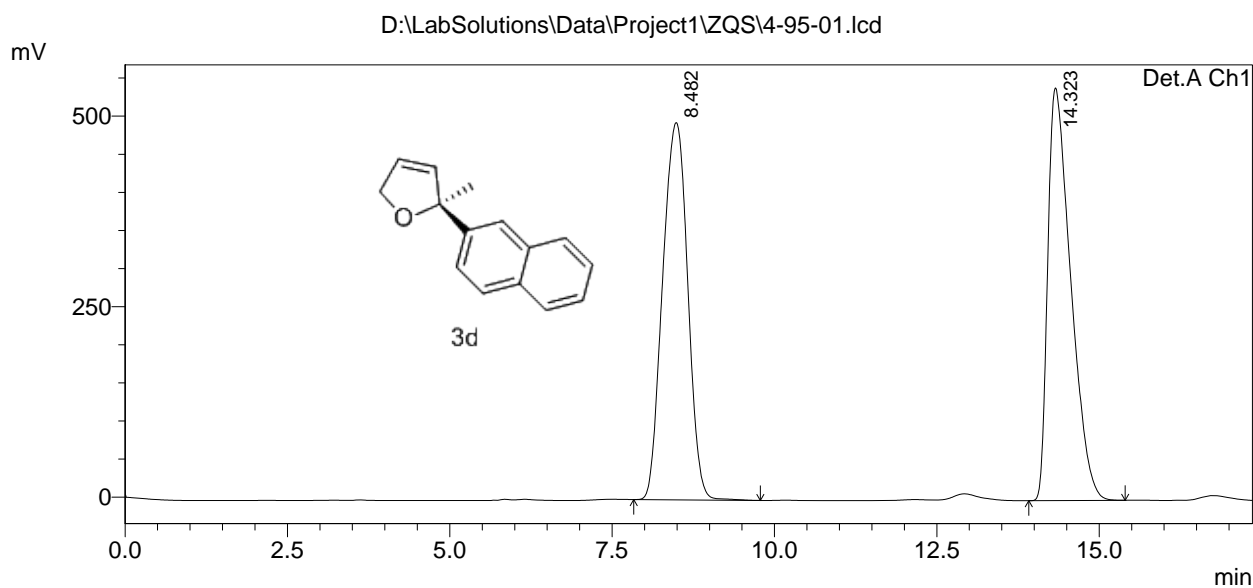

1 Det.A Ch1/214nm

PeakTable

Detector A Ch1 214nm

| Peak# | Ret. Time | Area     | Height  | Area %  |
|-------|-----------|----------|---------|---------|
| 1     | 8.482     | 13295460 | 494929  | 49.981  |
| 2     | 14.323    | 13305352 | 541496  | 50.019  |
| Total |           | 26600812 | 1036425 | 100.000 |

# ==== Shimadzu LCsolution Analysis Report ====

D:\LabSolutions\Data\Project1\ZQS\5-4-3.lcd

Acquired by : Admin  
 Sample Name : 5-4-3  
 Sample ID : OD-H,99.5/0.5,1.0,214  
 Vail # : 0  
 Injection Volume : 10 uL  
 Data File Name : 5-4-3.lcd  
 Method File Name : 1234.lcm  
 Batch File Name :  
 Report File Name : Default.lcr  
 Data Acquired : 2013-11-29 23:14:16  
 Data Processed : 2013-11-29 23:35:47

## <Chromatogram>

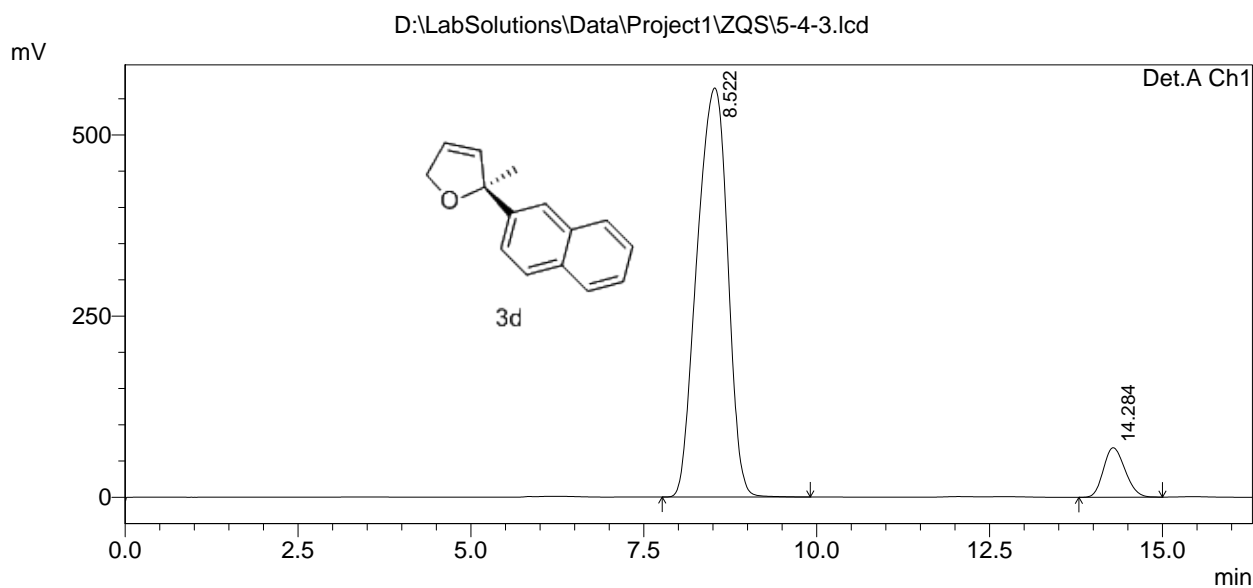

PeakTable

Detector A Ch1 214nm

| Peak# | Ret. Time | Area     | Height | Area %  |
|-------|-----------|----------|--------|---------|
| 1     | 8.522     | 17374411 | 564736 | 92.112  |
| 2     | 14.284    | 1487917  | 68421  | 7.888   |
| Total |           | 18862328 | 633157 | 100.000 |

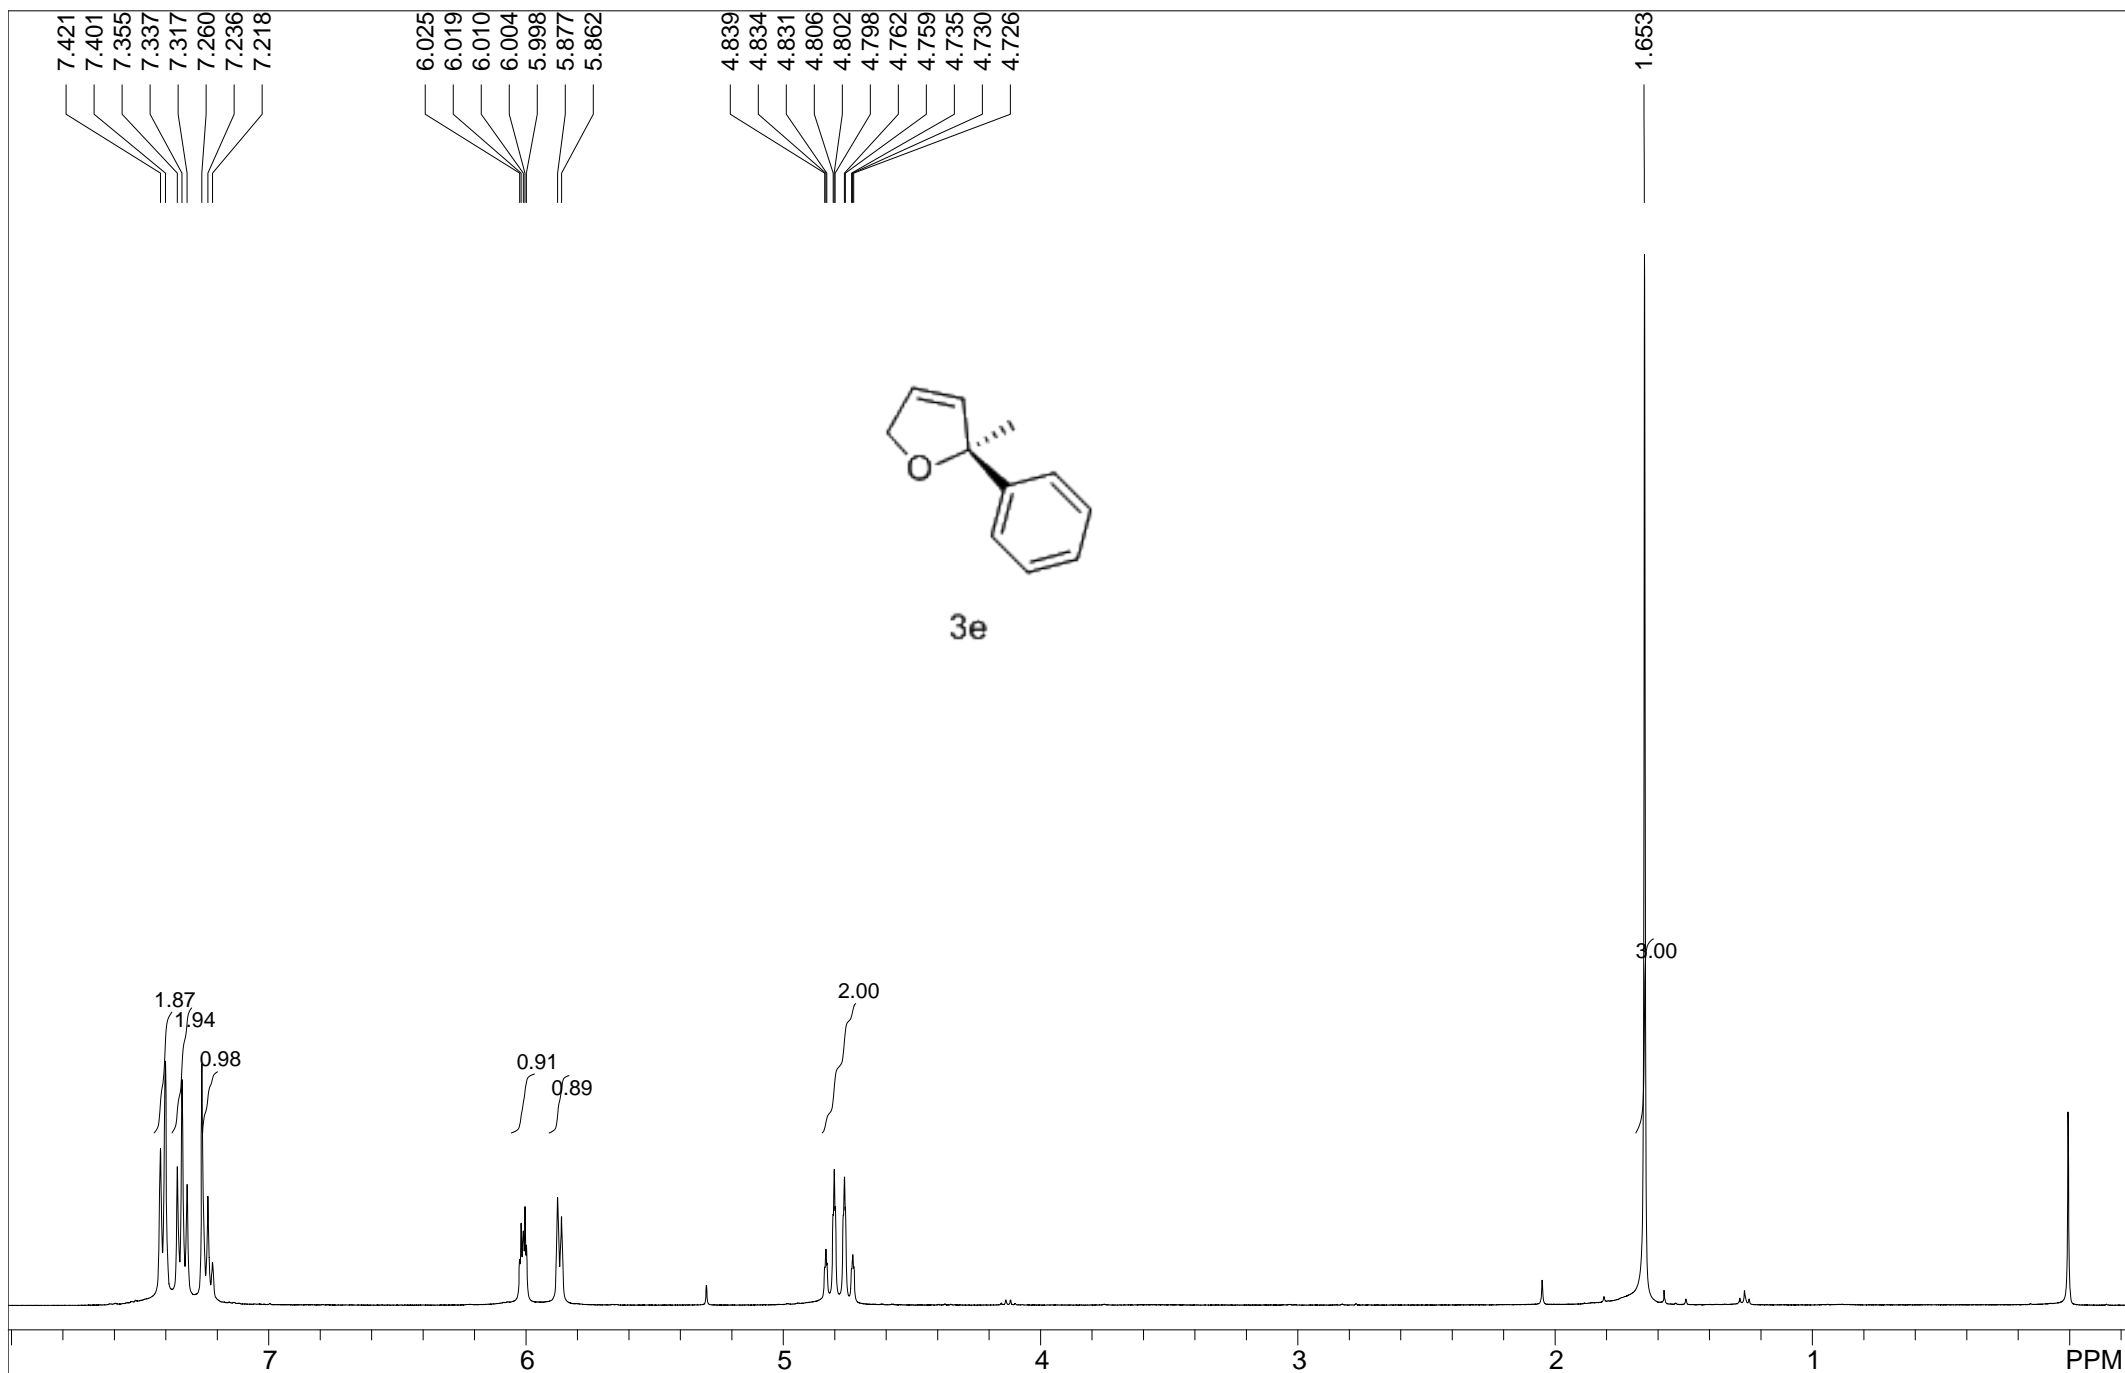

Std proton;blank line

USER: -- DATE: Jan 7 2015

|             |             |             |             |                      |
|-------------|-------------|-------------|-------------|----------------------|
| F1: 400.032 | F2: 100.597 | SW1: 8013   | OF1: 3207.3 | PTS1d: 24038 , 32768 |
| EX: s2pul   | PW: 10.6 us | PD: 1.0 sec | NA: 24      | LB: 0.0              |

Nuts - \$5-75-01-HNMR.fid



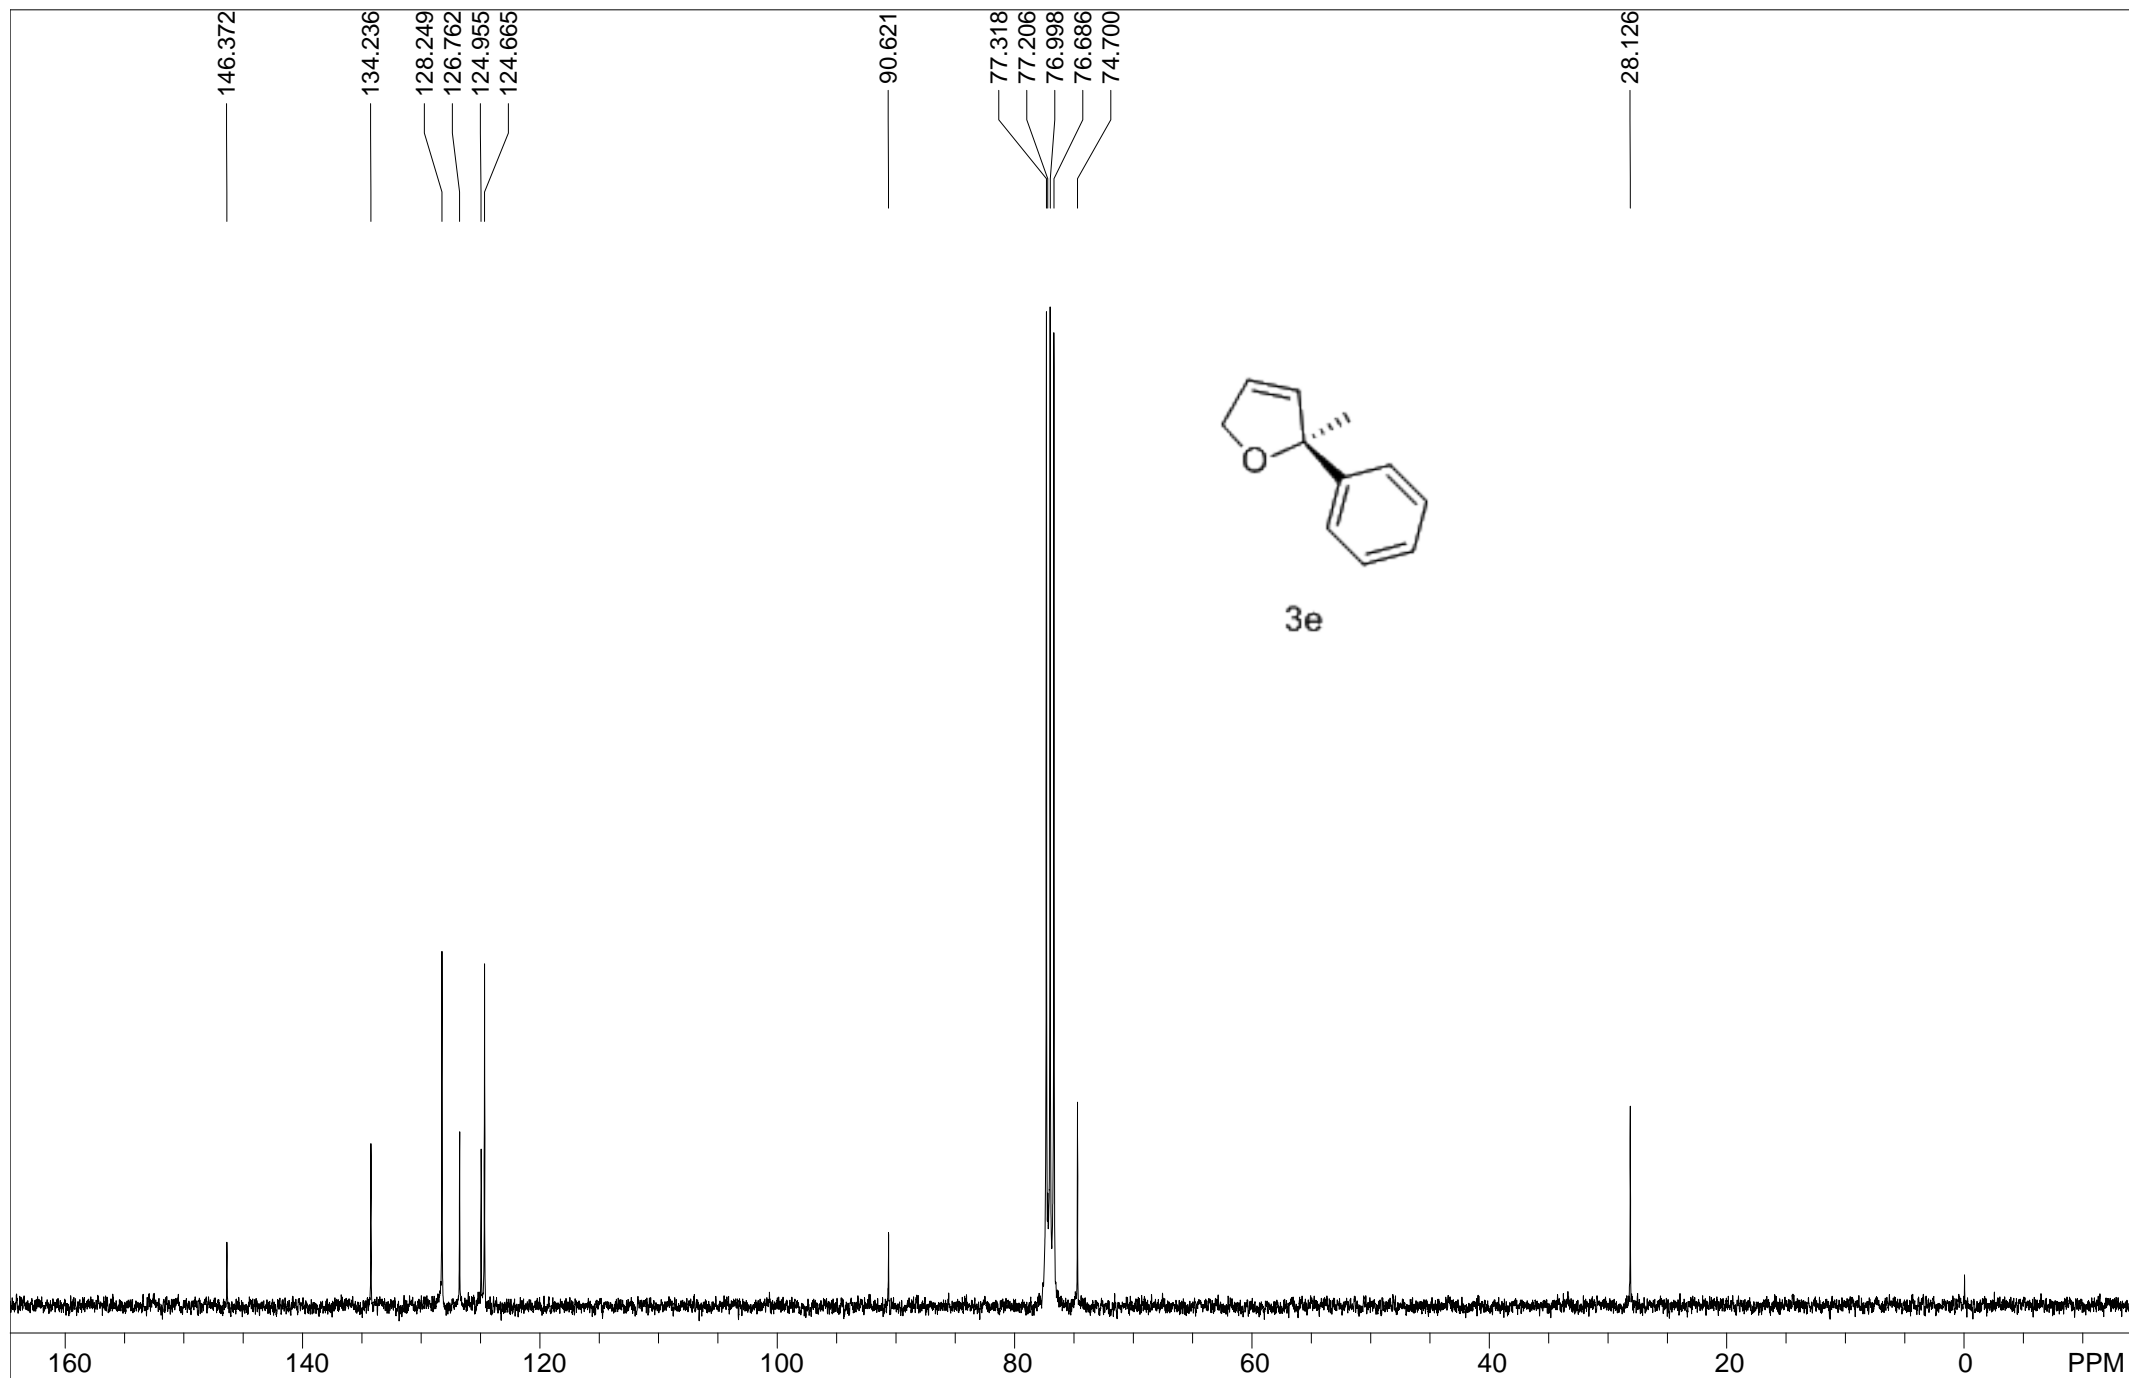

Std carbon;blank line

USER: -- DATE: Jan 7 2015

|             |             |            |             |              |         |                             |
|-------------|-------------|------------|-------------|--------------|---------|-----------------------------|
| F1: 100.598 | F2: 400.031 | SW1: 24510 |             | OF1: 10561.6 |         | PTS1d: 31875 , 32768        |
| EX: s2pul   |             | PW: 4.1 us | PD: 1.0 sec | NA: 600      | LB: 2.0 | Nuts - \$5-75-01-CNMR-5.fid |

=====  
Acq. Operator :  
Sample Operator :  
Acq. Instrument : SFC Location : Vial 53  
Injection Date : 1/12/2015 2:58:41 PM  
Inj Volume : 5.000 µl  
Acq. Method : C:\CHEM32\1\METHODS\AGILENT\_SFC6.M  
Last changed : 1/12/2015 2:48:16 PM by  
(modified after loading)  
Analysis Method : C:\CHEM32\1\METHODS\AGILENT\_SFC6.M  
Last changed : 1/12/2015 4:40:49 PM by  
(modified after loading)  
Additional Info : Peak(s) manually integrated

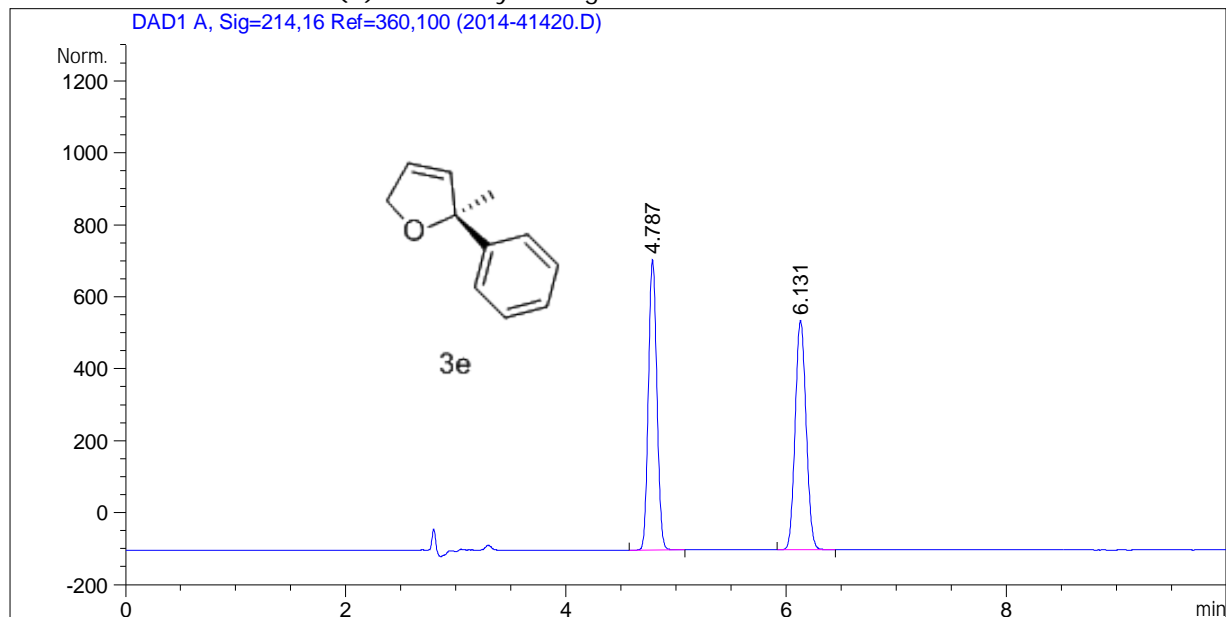

=====  
Area Percent Report  
=====

Sorted By : Signal  
Multiplier : 1.0000  
Dilution : 1.0000  
Do not use Multiplier & Dilution Factor with ISTDs

Signal 1: DAD1 A, Sig=214,16 Ref=360,100

| Peak # | RetTime [min] | Type | Width [min] | Area [mAU*s] | Height [mAU] | Area %  |
|--------|---------------|------|-------------|--------------|--------------|---------|
| 1      | 4.787         | BB   | 0.0845      | 3187.76489   | 594.76520    | 49.5463 |
| 2      | 6.131         | BB   | 0.1087      | 3246.14063   | 469.56680    | 50.4537 |

Totals : 6433.90552 1064.33200

=====  
\*\*\* End of Report \*\*\*

Sample Name: 5-75-01-02

```

=====
Acq. Operator   :
Sample Operator :
Acq. Instrument : SFC                               Location : Vial 55
Injection Date  : 1/12/2015 3:28:13 PM
                                           Inj Volume : 5.000 µl
Acq. Method     : C:\CHEM32\1\METHODS\AGILENT_SFC6.M
Last changed    : 1/12/2015 2:48:16 PM by
                  (modified after loading)
Analysis Method : C:\CHEM32\1\METHODS\AGILENT_SFC6.M
Last changed    : 1/12/2015 4:43:08 PM by
                  (modified after loading)
Additional Info : Peak(s) manually integrated
  
```

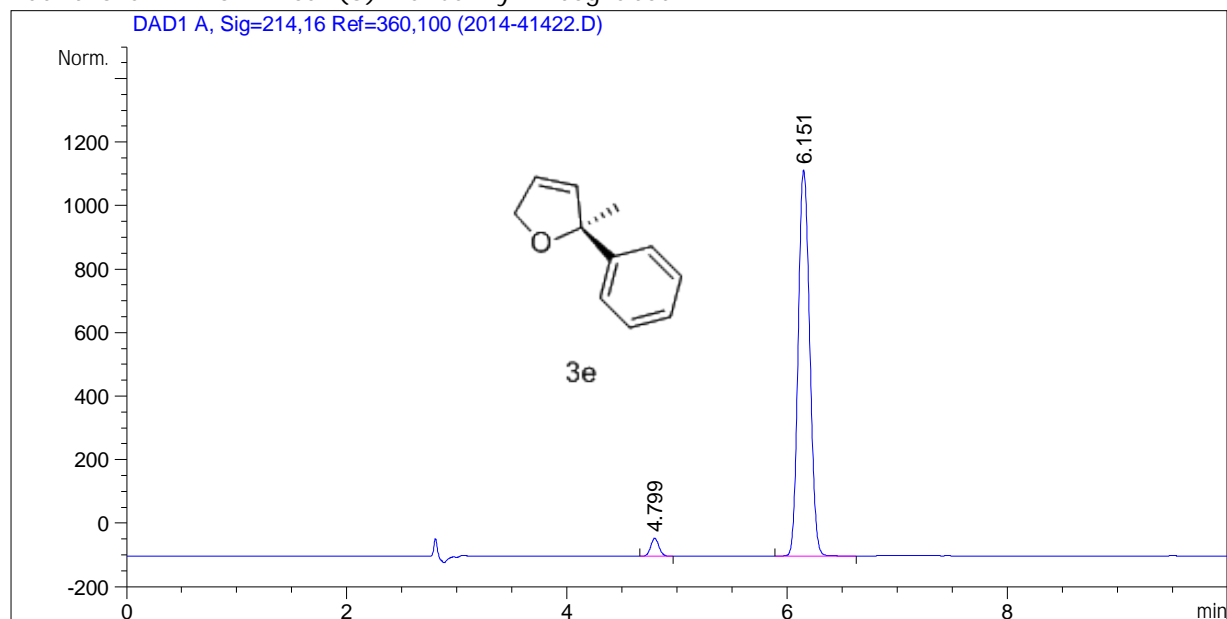

```

=====
                          Area Percent Report
=====
  
```

```

Sorted By      :      Signal
Multiplier     :      1.0000
Dilution       :      1.0000
Do not use Multiplier & Dilution Factor with ISTDs
  
```

Signal 1: DAD1 A, Sig=214,16 Ref=360,100

| Peak # | RetTime [min] | Type | Width [min] | Area [mAU*s] | Height [mAU] | Area %  |
|--------|---------------|------|-------------|--------------|--------------|---------|
| 1      | 4.799         | BB   | 0.0810      | 243.76845    | 46.65076     | 3.2306  |
| 2      | 6.151         | VB   | 0.1148      | 7301.77490   | 1004.32043   | 96.7694 |

```
Totals :                7545.54335 1050.97120
```

```

=====
*** End of Report ***
  
```

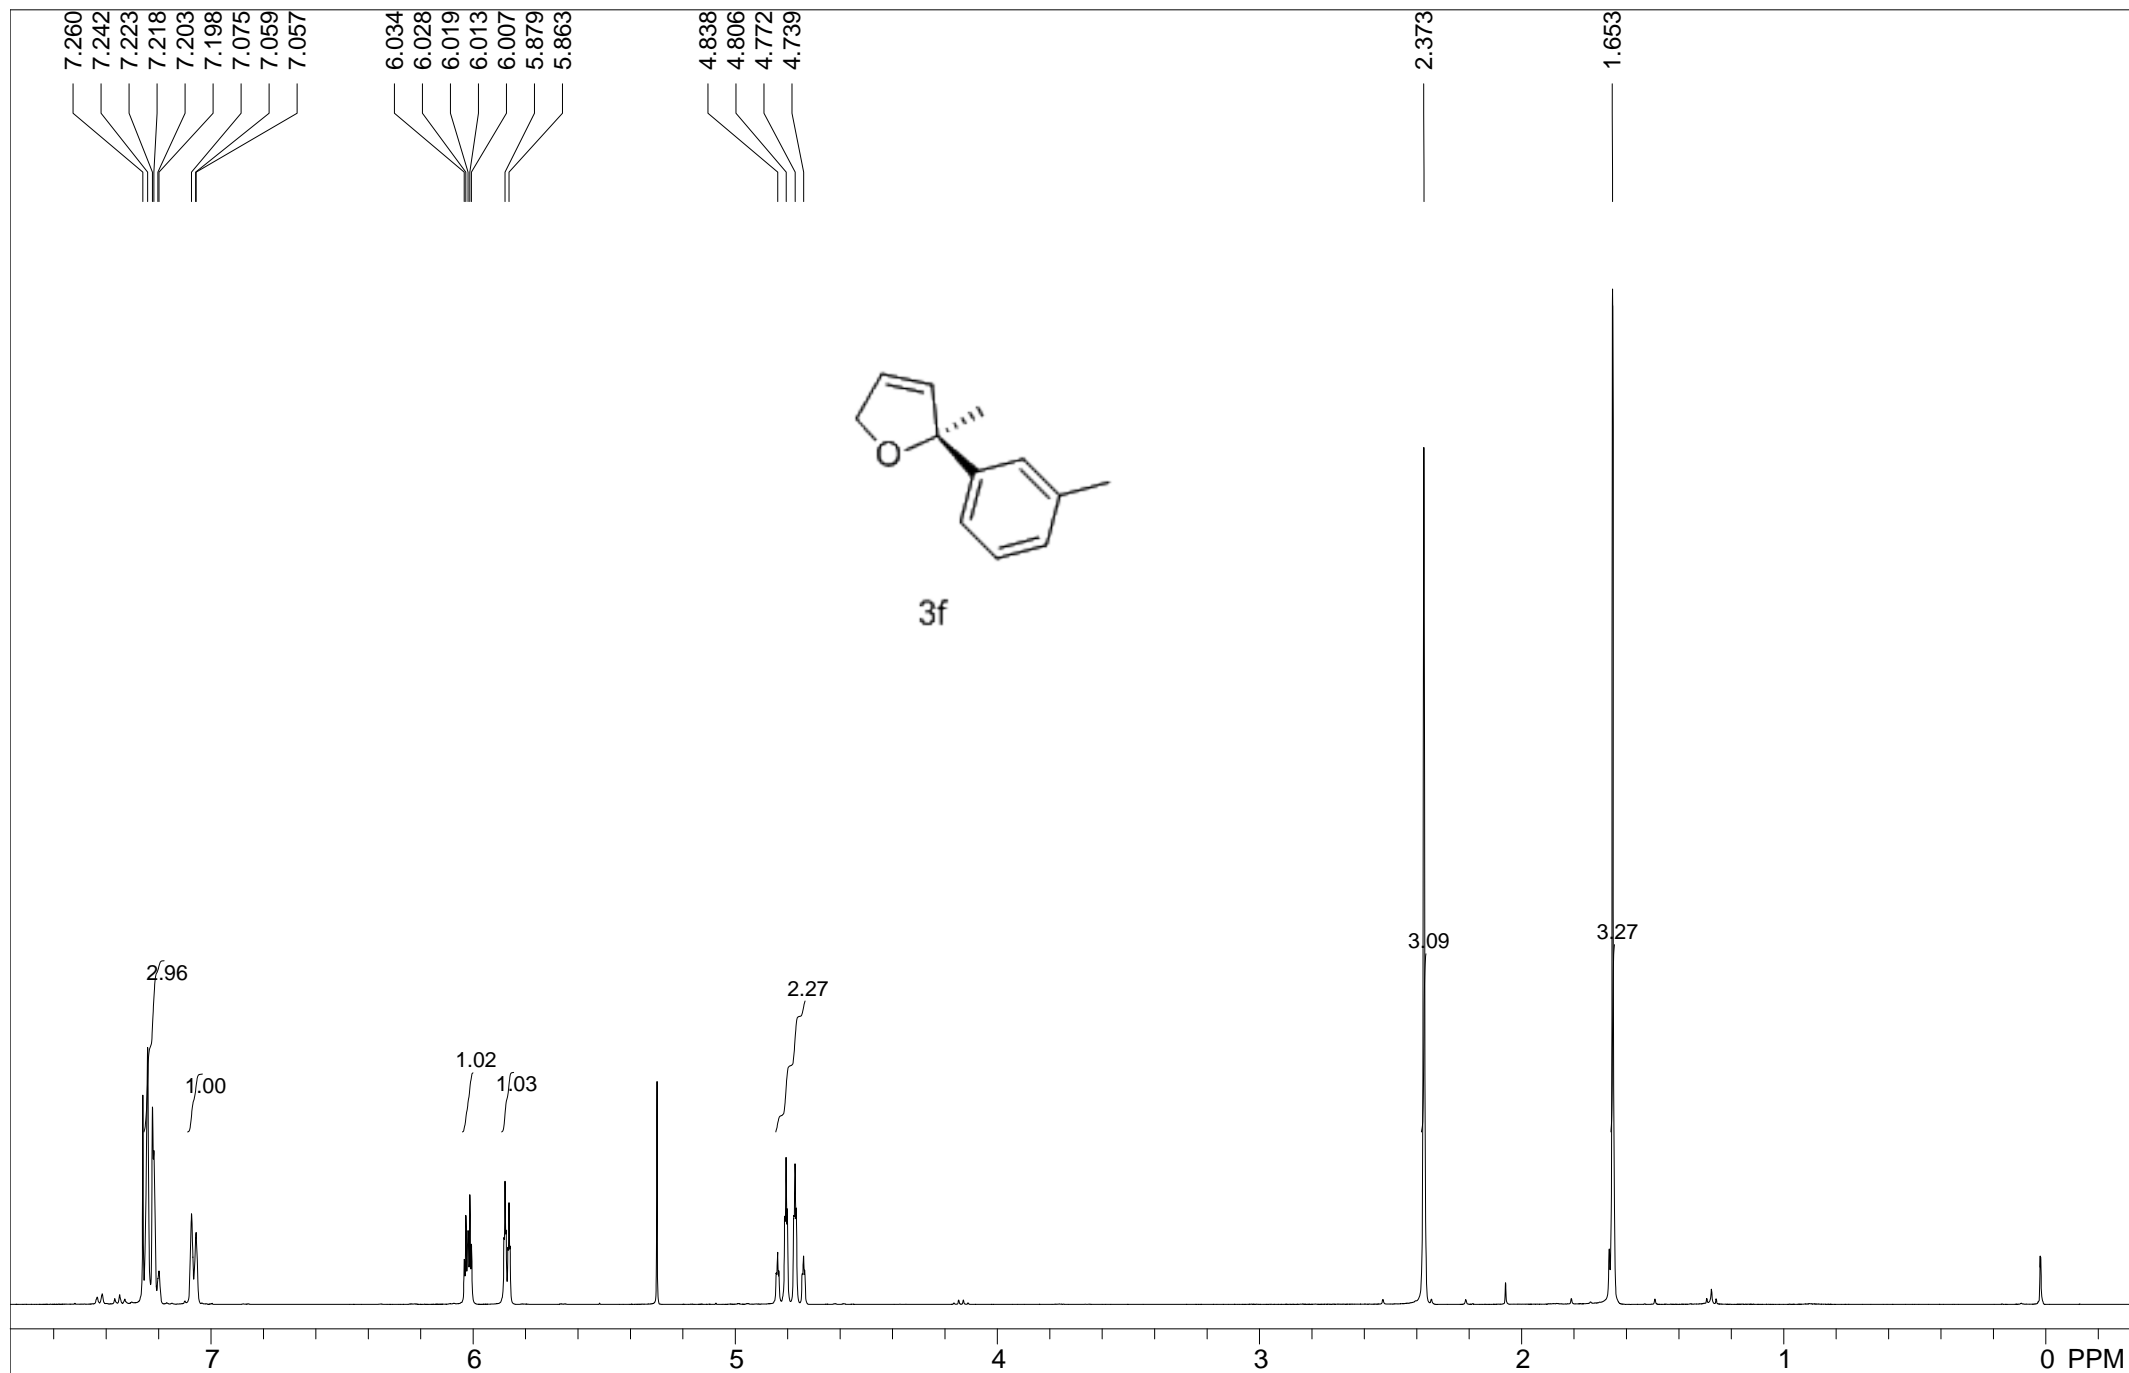

|             |             |             |  |                            |         |                             |  |
|-------------|-------------|-------------|--|----------------------------|---------|-----------------------------|--|
| :blank line |             |             |  | USER: -- DATE: Jan 20 2015 |         |                             |  |
| F1: 399.723 | F2: 100.519 | SW1: 7143   |  | OF1: 2778.5                |         | PTS1d: 21429 , 32768        |  |
| EX: s2pul   | PW: 4.4 us  | PD: 1.0 sec |  | NA: 12                     | LB: 0.0 | Nuts - \$5-96-01-HNMR-2.fid |  |

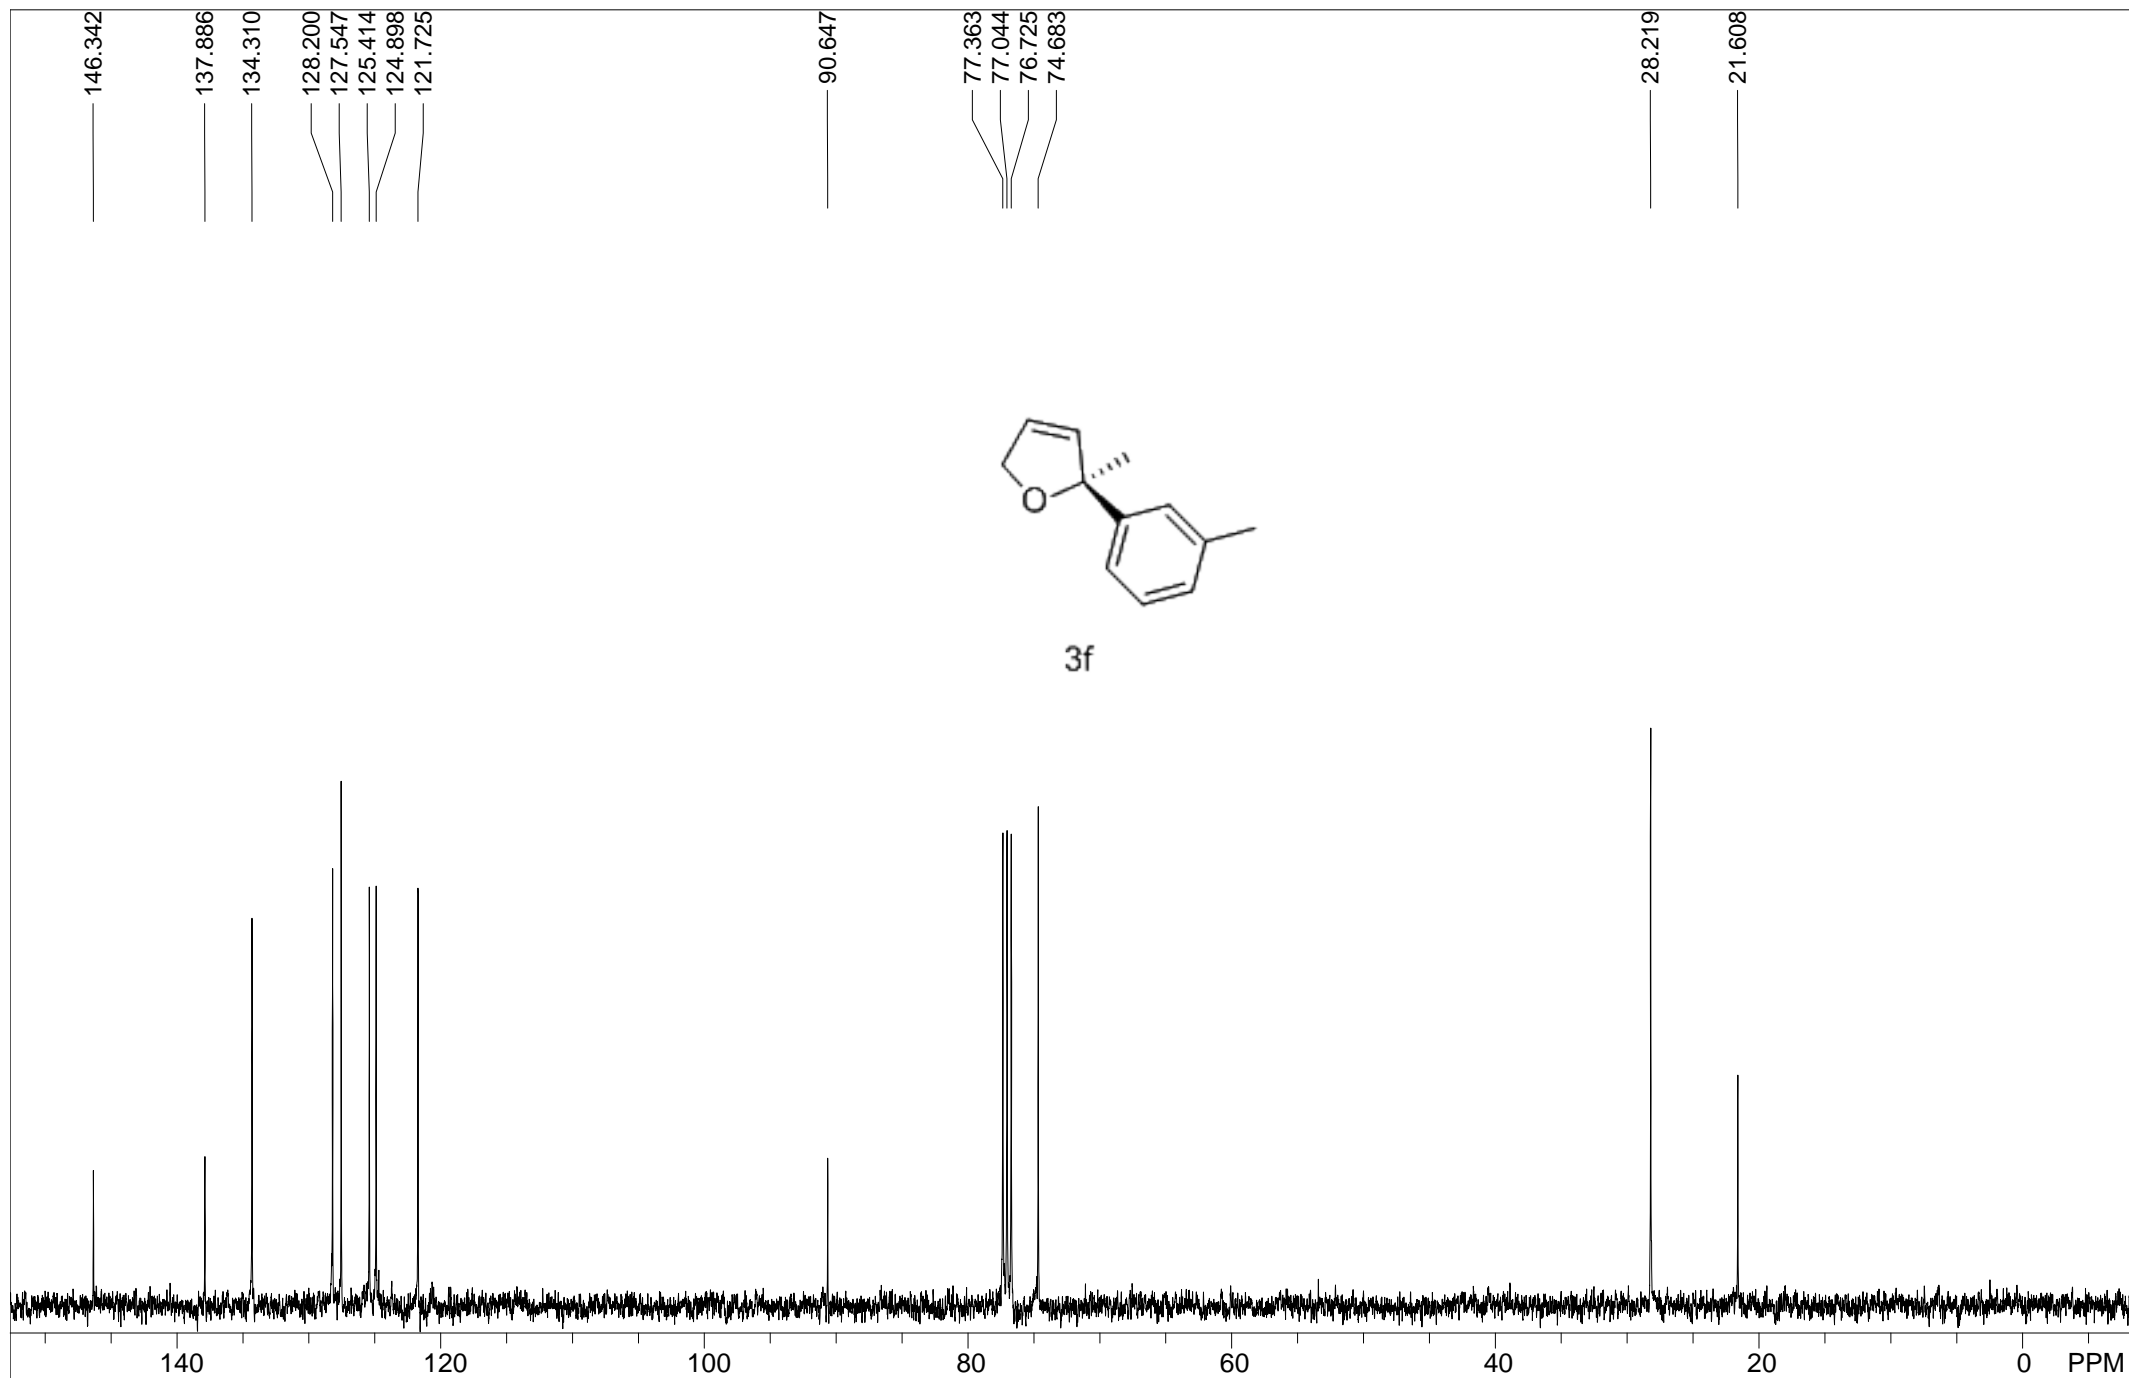

|                |             |             |  |              |                            |                             |  |
|----------------|-------------|-------------|--|--------------|----------------------------|-----------------------------|--|
| new experiment |             |             |  |              | USER: -- DATE: Jan 20 2015 |                             |  |
| F1: 100.521    | F2: 399.722 | SW1: 25000  |  | OF1: 11056.1 |                            | PTS1d: 32768 , 32768        |  |
| EX: s2pul      | PW: 4.9 us  | PD: 1.0 sec |  | NA: 80       | LB: 2.0                    | Nuts - \$5-96-01-CNMR-2.fid |  |

Sample Name: 5-96-01

```

=====
Acq. Operator   :
Sample Operator :
Acq. Instrument : SFC                               Location : Vial 60
Injection Date  : 1/30/2015 1:59:20 PM
                                           Inj Volume : 5.000 µl

Acq. Method     : C:\CHEM32\1\METHODS\AGILENT_SFC6.M
Last changed    : 1/30/2015 9:40:41 AM by
                  (modified after loading)
Analysis Method : C:\CHEM32\1\METHODS\AGILENT_SFC6.M
Last changed    : 1/30/2015 4:23:37 PM by
                  (modified after loading)
Additional Info  : Peak(s) manually integrated
  
```

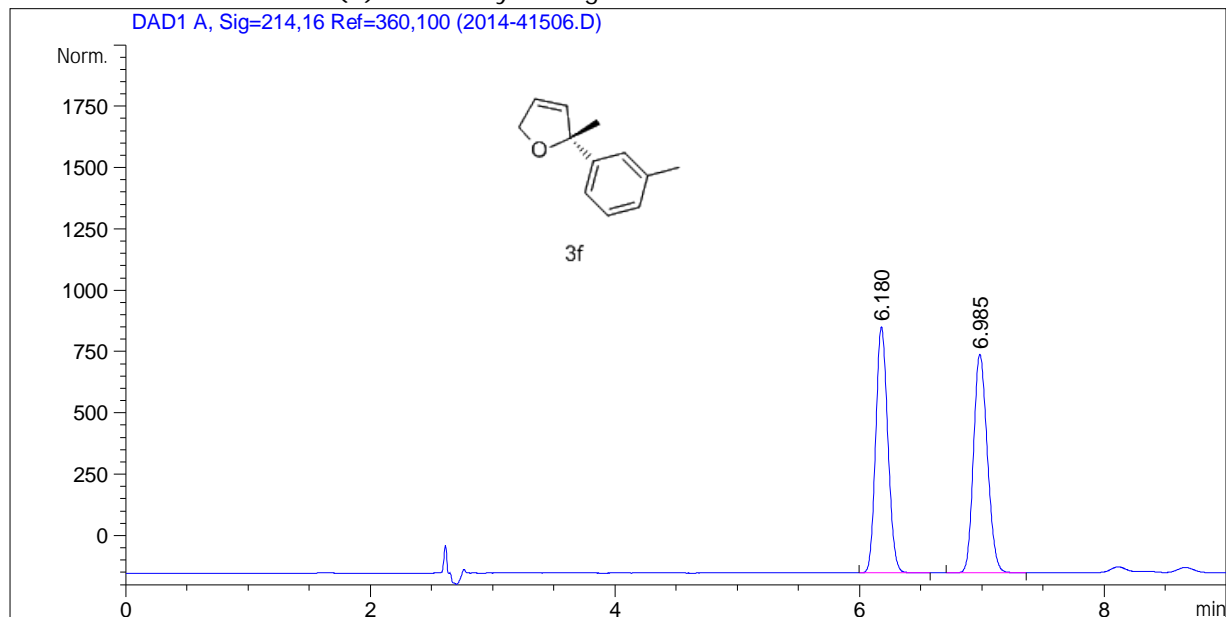

```

=====
                          Area Percent Report
=====
  
```

```

Sorted By      :      Signal
Multiplier     :      1.0000
Dilution       :      1.0000
Do not use Multiplier & Dilution Factor with ISTDs
  
```

Signal 1: DAD1 A, Sig=214,16 Ref=360,100

| Peak # | RetTime [min] | Type | Width [min] | Area [mAU*s] | Height [mAU] | Area %  |
|--------|---------------|------|-------------|--------------|--------------|---------|
| 1      | 6.180         | BB   | 0.1074      | 4714.29248   | 683.82098    | 49.8088 |
| 2      | 6.985         | BB   | 0.1225      | 4750.49365   | 606.02698    | 50.1912 |

```
Totals :                9464.78613 1289.84796
```

```

=====
*** End of Report ***
  
```

Sample Name: 6-13-01

```

=====
Acq. Operator   :
Sample Operator :
Acq. Instrument : SFC                               Location : Vial 59
Injection Date  : 1/30/2015 1:45:51 PM
                                           Inj Volume : 5.000 µl
Acq. Method     : C:\CHEM32\1\METHODS\AGILENT_SFC6.M
Last changed    : 1/30/2015 9:40:41 AM by :
                  (modified after loading)
Analysis Method : C:\CHEM32\1\METHODS\AGILENT_SFC6.M
Last changed    : 1/30/2015 2:10:52 PM by :
                  (modified after loading)
Additional Info  : Peak(s) manually integrated
  
```

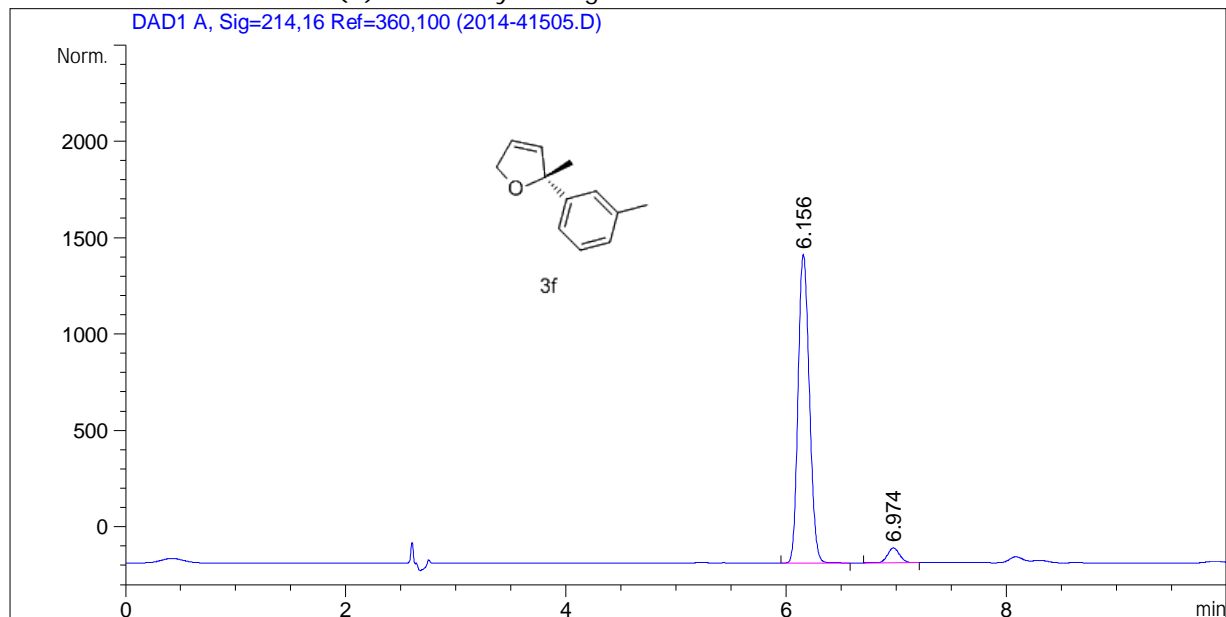

```

=====
                          Area Percent Report
=====
  
```

```

Sorted By      :      Signal
Multiplier     :      1.0000
Dilution       :      1.0000
Do not use Multiplier & Dilution Factor with ISTDs
  
```

Signal 1: DAD1 A, Sig=214,16 Ref=360,100

| Peak # | RetTime [min] | Type | Width [min] | Area [mAU*s] | Height [mAU] | Area %  |
|--------|---------------|------|-------------|--------------|--------------|---------|
| 1      | 6.156         | BB   | 0.1121      | 8650.59766   | 1214.98315   | 95.1315 |
| 2      | 6.974         | BB   | 0.1176      | 442.70697    | 58.27919     | 4.8685  |

```
Totals :                9093.30463 1273.26235
```

```

=====
*** End of Report ***
  
```

7.519  
7.516  
7.509  
7.498  
7.495  
7.260  
7.186  
7.180  
7.172  
7.163  
7.157  
7.150  
6.270  
6.264  
6.258  
6.254  
6.248  
6.242  
5.923  
5.908

4.785  
4.780  
4.775  
4.752  
4.747  
4.742  
4.676  
4.672  
4.670  
4.666  
4.643  
4.640  
4.637  
4.633

2.507

1.679

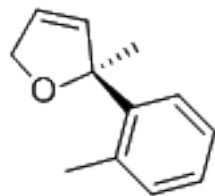

3g

1.00  
3.05  
1.01  
0.98  
1.10  
1.08

3.10

3.20

8 7 6 5 4 3 2 1 0 PPM

|             |             |             |  |                            |         |                           |  |
|-------------|-------------|-------------|--|----------------------------|---------|---------------------------|--|
| :blank line |             |             |  | USER: -- DATE: Jan 20 2015 |         |                           |  |
| F1: 399.723 | F2: 100.519 | SW1: 7143   |  | OF1: 2778.5                |         | PTS1d: 21429 , 32768      |  |
| EX: s2pul   | PW: 4.4 us  | PD: 1.0 sec |  | NA: 8                      | LB: 0.0 | Nuts - \$5-95-01-HNMR.fid |  |



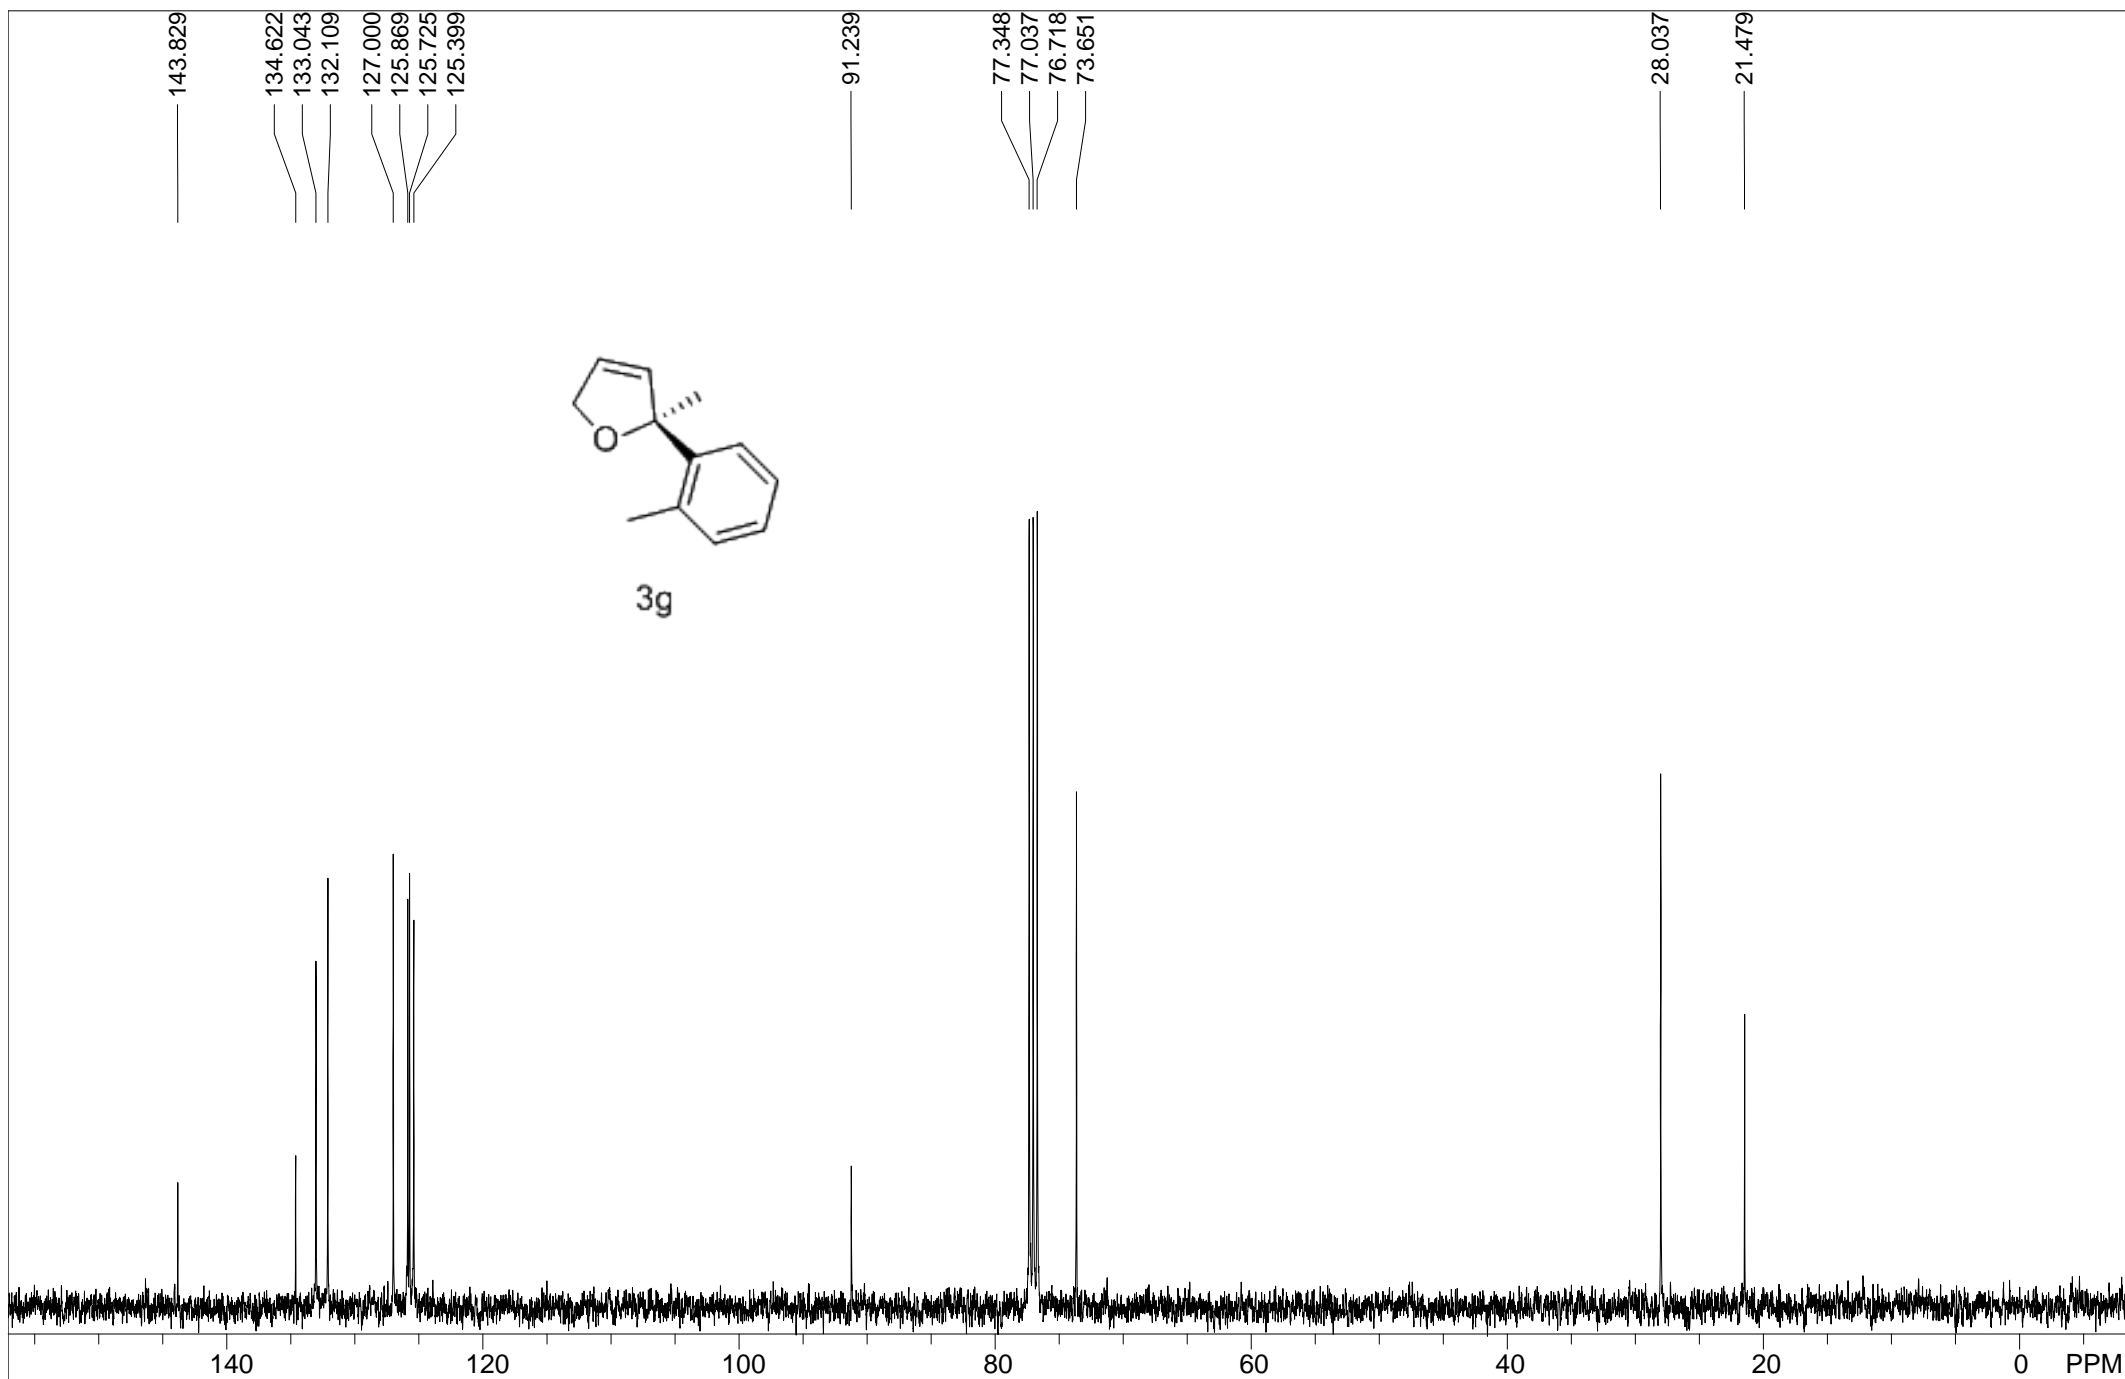

new experiment

USER: -- DATE: Jan 20 2015

|             |             |             |  |              |         |                             |
|-------------|-------------|-------------|--|--------------|---------|-----------------------------|
| F1: 100.521 | F2: 399.722 | SW1: 25000  |  | OF1: 11056.1 |         | PTS1d: 32768 , 32768        |
| EX: s2pul   | PW: 4.9 us  | PD: 1.0 sec |  | NA: 80       | LB: 2.0 | Nuts - \$5-95-01-CNMR-2.fid |

=====  
Acq. Operator :  
Location : Vial 13  
Injection Date : 1/23/2015 1:25:39 PM  
Acq. Method : AGILENT\_SFC6.M  
Analysis Method : C:\CHEM32\1\METHODS\AGILENT\_SFC6.M  
Last changed : 1/23/2015 3:32:52 PM by  
(modified after loading)  
Additional Info : Peak(s) manually integrated

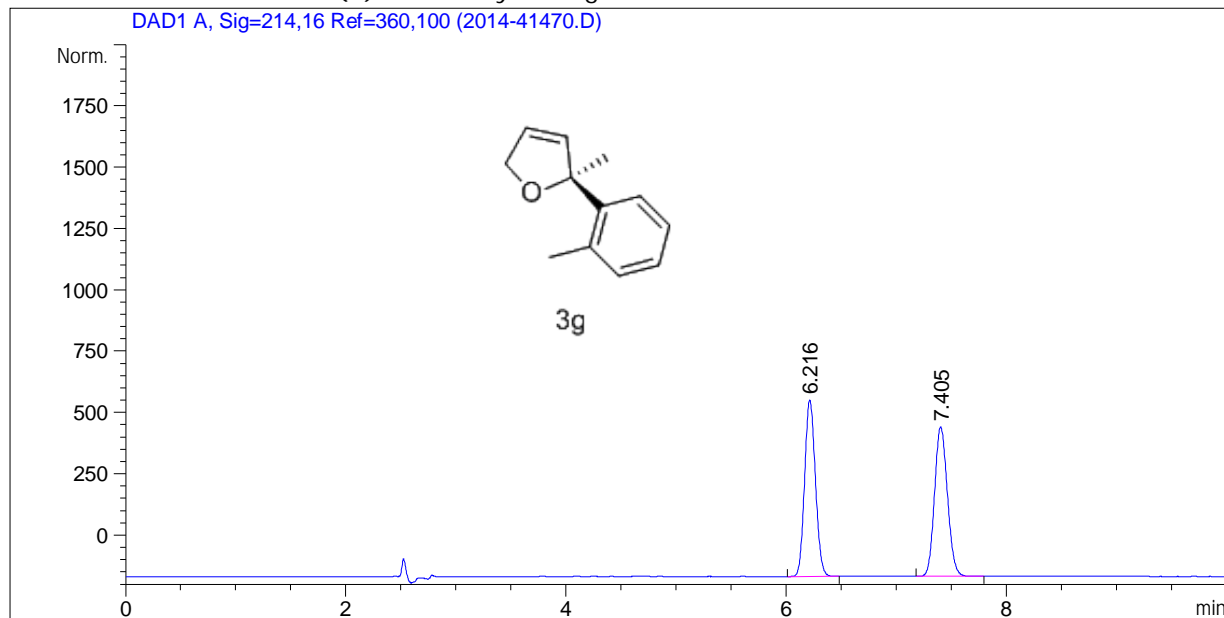

=====  
Area Percent Report  
=====

Sorted By : Signal  
Multiplier : 1.0000  
Dilution : 1.0000  
Do not use Multiplier & Dilution Factor with ISTDs

Signal 1: DAD1 A, Sig=214,16 Ref=360,100

| Peak # | RetTime [min] | Type | Width [min] | Area [mAU*s] | Height [mAU] | Area %  |
|--------|---------------|------|-------------|--------------|--------------|---------|
| 1      | 6.216         | BB   | 0.1070      | 2518.53979   | 367.18314    | 49.8036 |
| 2      | 7.405         | BB   | 0.1283      | 2538.40430   | 310.88080    | 50.1964 |

Totals : 5056.94409 678.06393

=====  
\*\*\* End of Report \*\*\*

Sample Name: 6-7-01

```

=====
Acq. Operator   :
Sample Operator :
Acq. Instrument : SFC                               Location : Vial 13
Injection Date  : 1/28/2015 2:39:47 PM
                                           Inj Volume : 5.000 µl
Acq. Method     : C:\CHEM32\1\METHODS\AGILENT_SFC6.M
Last changed    : 1/28/2015 2:10:58 PM by
                  (modified after loading)
Analysis Method : C:\CHEM32\1\METHODS\AGILENT_SFC6.M
Last changed    : 1/28/2015 3:22:28 PM by
                  (modified after loading)
Additional Info : Peak(s) manually integrated
  
```

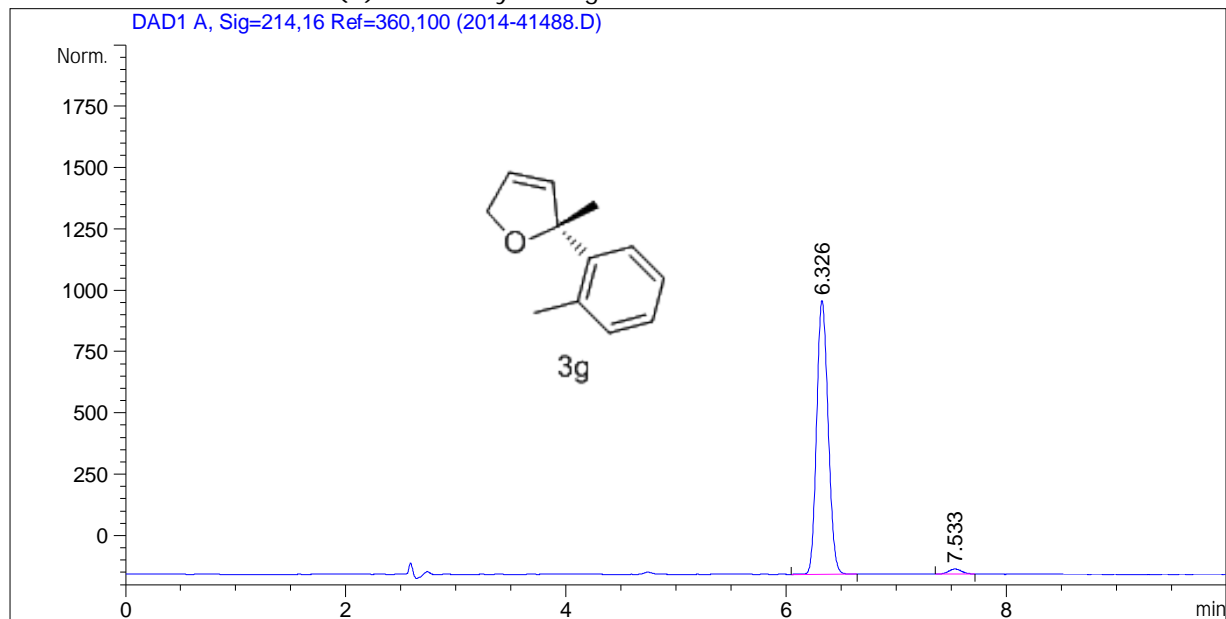

```

=====
                          Area Percent Report
=====
  
```

```

Sorted By      :      Signal
Multiplier     :      1.0000
Dilution       :      1.0000
Do not use Multiplier & Dilution Factor with ISTDs
  
```

Signal 1: DAD1 A, Sig=214,16 Ref=360,100

| Peak # | RetTime [min] | Type | Width [min] | Area [mAU*s] | Height [mAU] | Area %  |
|--------|---------------|------|-------------|--------------|--------------|---------|
| 1      | 6.326         | BB   | 0.1123      | 5735.41943   | 793.55505    | 97.9374 |
| 2      | 7.533         | MM R | 0.1302      | 120.78796    | 14.61711     | 2.0626  |

```
Totals :                5856.20739  808.17216
```

```

=====
*** End of Report ***
  
```

7.384  
7.379  
7.371  
7.367  
7.363  
7.354  
7.349  
7.260  
7.036  
7.028  
7.023  
7.011  
7.006  
7.001  
6.989  
6.984  
6.976  
5.984  
5.978  
5.971  
5.969  
5.963  
5.957  
5.884  
5.869  
4.824  
4.820  
4.815  
4.791  
4.787  
4.782  
4.751  
4.746  
4.741  
4.718  
4.714  
4.708

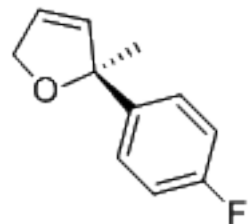

3h

1.631

1.85

1.88

0.90  
0.93

2.11

3.00

8

7

6

5

4

3

2

1

0 PPM

|             |             |             |  |                            |         |                           |  |
|-------------|-------------|-------------|--|----------------------------|---------|---------------------------|--|
| :blank line |             |             |  | USER: -- DATE: Jan 20 2015 |         |                           |  |
| F1: 399.723 | F2: 100.519 | SW1: 7143   |  | OF1: 2778.5                |         | PTS1d: 21429 , 32768      |  |
| EX: s2pul   | PW: 4.4 us  | PD: 1.0 sec |  | NA: 8                      | LB: 0.0 | Nuts - \$5-97-01-HNMR.fid |  |

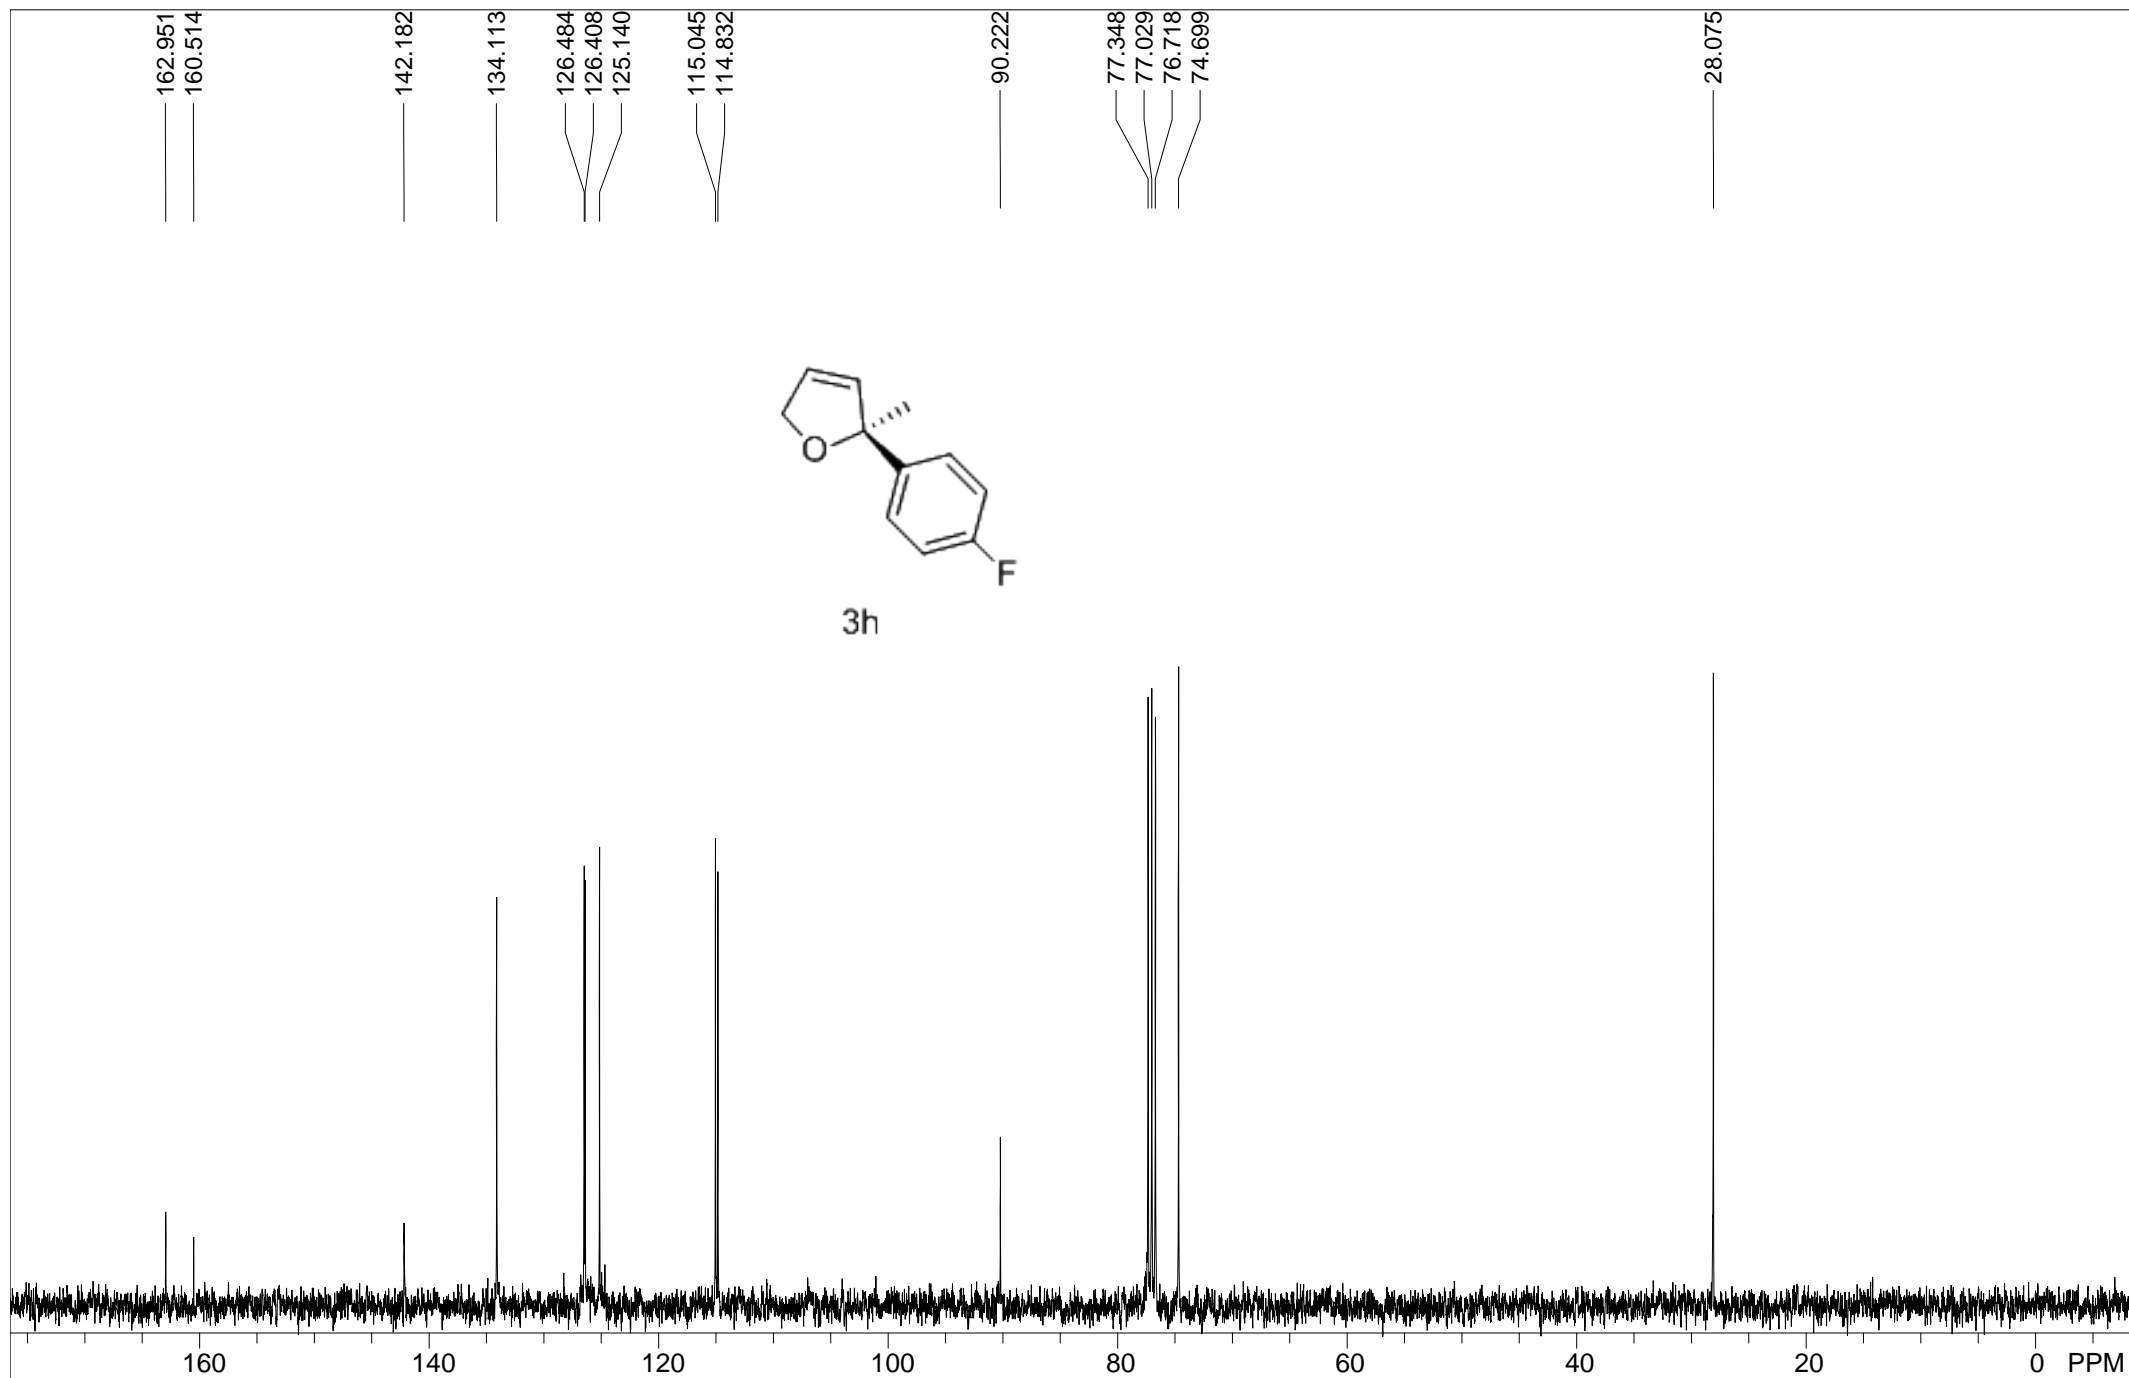

new experiment

USER: -- DATE: Jan 20 2015

|             |             |             |  |              |         |                           |
|-------------|-------------|-------------|--|--------------|---------|---------------------------|
| F1: 100.521 | F2: 399.722 | SW1: 25000  |  | OF1: 11056.1 |         | PTS1d: 32768 , 32768      |
| EX: s2pul   | PW: 4.9 us  | PD: 1.0 sec |  | NA: 48       | LB: 2.0 | Nuts - \$5-97-01-CNMR.fid |

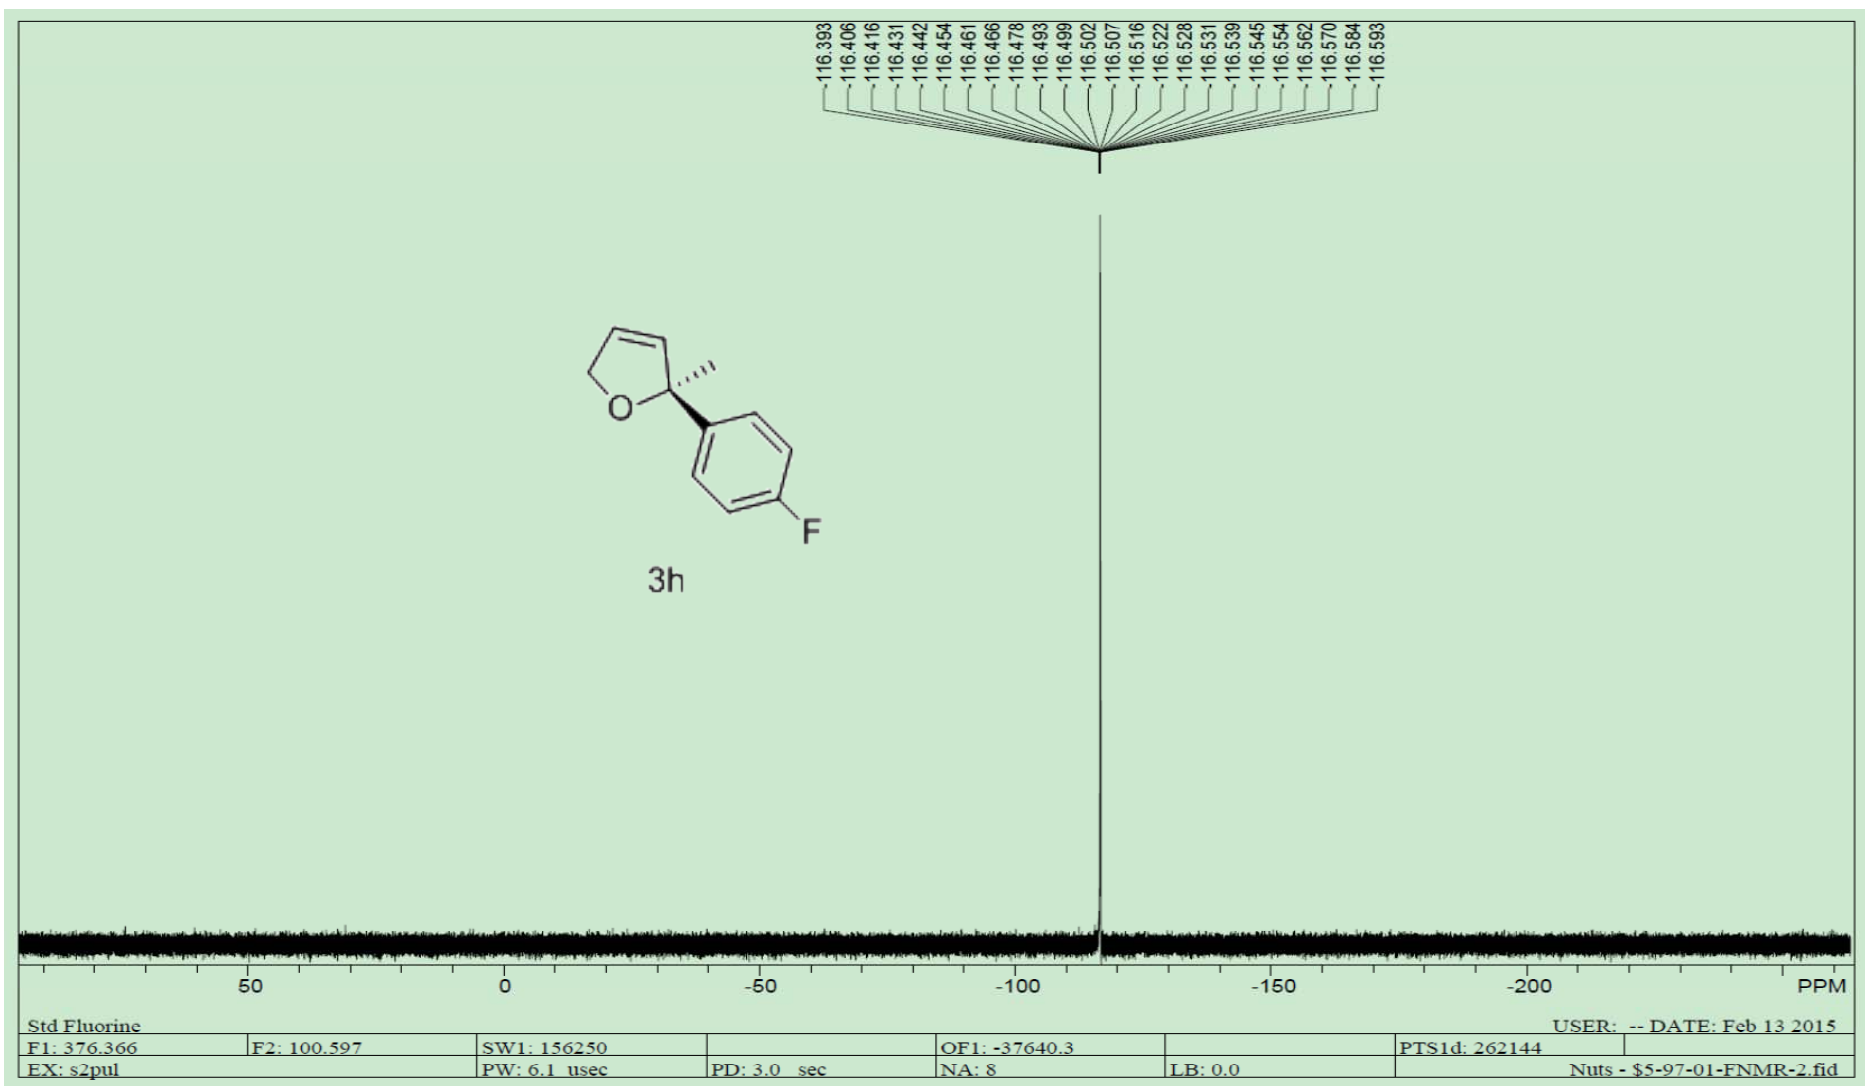

=====  
Acq. Operator :  
Sample Operator :  
Acq. Instrument : SFC Location : Vial 15  
Injection Date : 1/23/2015 2:01:11 PM  
Inj Volume : 5.000 µl  
Acq. Method : C:\CHEM32\1\METHODS\AGILENT\_SFC6.M  
Last changed : 1/23/2015 1:11:54 PM by  
(modified after loading)  
Analysis Method : C:\CHEM32\1\METHODS\AGILENT\_SFC6.M  
Last changed : 1/23/2015 3:26:28 PM by  
(modified after loading)  
Additional Info : Peak(s) manually integrated

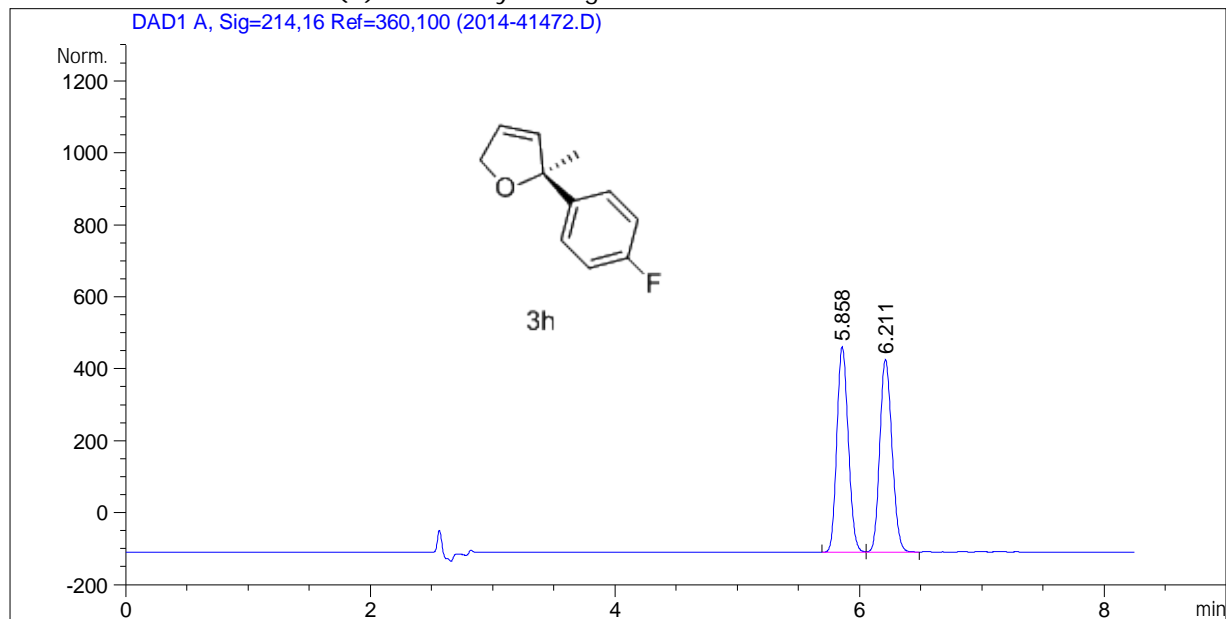

=====  
Area Percent Report  
=====

Sorted By : Signal  
Multiplier : 1.0000  
Dilution : 1.0000  
Do not use Multiplier & Dilution Factor with ISTDs

Signal 1: DAD1 A, Sig=214,16 Ref=360,100

| Peak # | RetTime [min] | Type | Width [min] | Area [mAU*s] | Height [mAU] | Area %  |
|--------|---------------|------|-------------|--------------|--------------|---------|
| 1      | 5.858         | BV   | 0.1019      | 2214.18286   | 340.27560    | 49.8936 |
| 2      | 6.211         | VB   | 0.1093      | 2223.62427   | 318.89984    | 50.1064 |

Totals : 4437.80713 659.17545

=====  
\*\*\* End of Report \*\*\*

Sample Name: 6-4-01

```

=====
Acq. Operator   :
Sample Operator :
Acq. Instrument : SFC                               Location : Vial 20
Injection Date  : 1/23/2015 2:53:03 PM
                                           Inj Volume : 5.000 µl
Acq. Method     : C:\CHEM32\1\METHODS\AGILENT_SFC6.M
Last changed    : 1/23/2015 1:11:54 PM by
                  (modified after loading)
Analysis Method : C:\CHEM32\1\METHODS\AGILENT_SFC6.M
Last changed    : 1/23/2015 3:08:56 PM by
                  (modified after loading)
Additional Info  : Peak(s) manually integrated
  
```

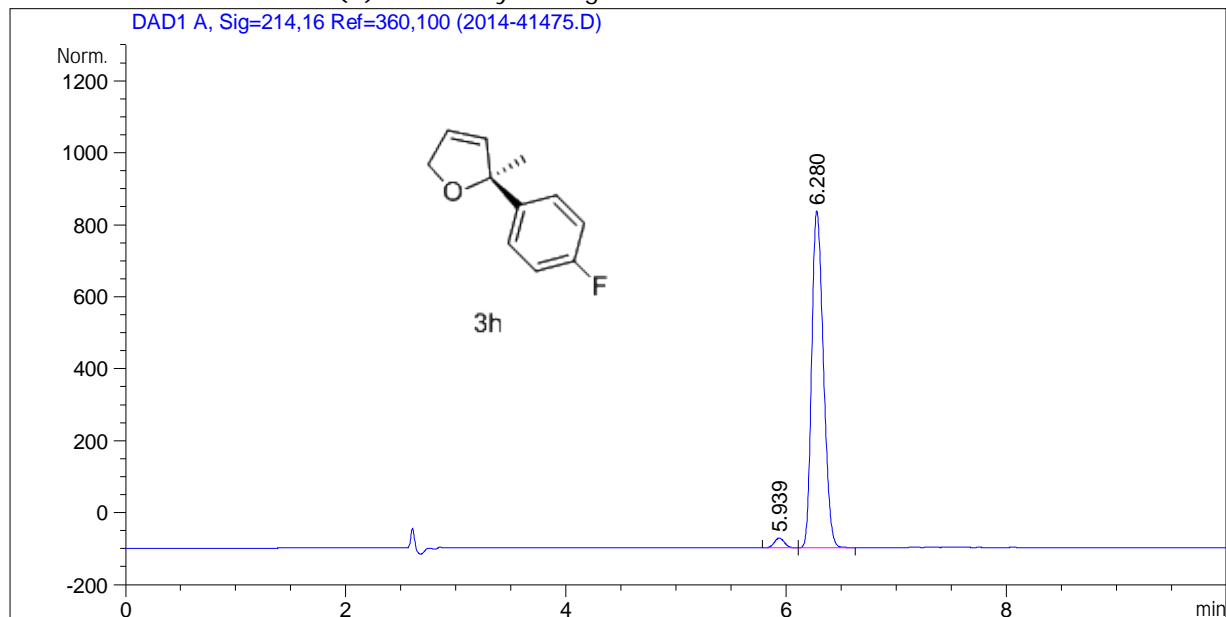

```

=====
                          Area Percent Report
=====
  
```

```

Sorted By           :      Signal
Multiplier          :      1.0000
Dilution            :      1.0000
Do not use Multiplier & Dilution Factor with ISTDs
  
```

Signal 1: DAD1 A, Sig=214,16 Ref=360,100

| Peak # | RetTime [min] | Type | Width [min] | Area [mAU*s] | Height [mAU] | Area %  |
|--------|---------------|------|-------------|--------------|--------------|---------|
| 1      | 5.939         | BB   | 0.1001      | 137.86436    | 21.70544     | 2.4723  |
| 2      | 6.280         | BB   | 0.1163      | 5438.50146   | 734.92725    | 97.5277 |

```
Totals :                5576.36583  756.63269
```

```

=====
*** End of Report ***
  
```



7.314  
7.297  
7.293  
7.278  
7.274  
7.260  
7.158  
7.156  
7.137  
7.118  
7.112  
6.940  
6.934  
6.918  
6.913  
6.898  
6.895  
6.892  
5.980  
5.975  
5.966  
5.960  
5.954  
5.890  
5.875  
4.828  
4.824  
4.795  
4.792  
4.755  
4.751  
4.724  
4.722  
4.718

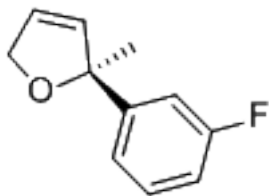

3i

1.629

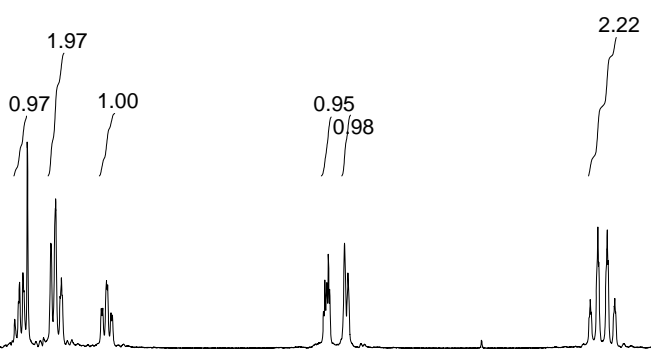

8 7 6 5 4 3 2 1 0 PPM

Std proton;blank line

USER: -- DATE: Feb 2 2015

F1: 400.032

F2: 100.597

SW1: 7225

OF1: 2807.1

PTS1d: 21676 , 32768

EX: s2pul

PW: 10.6 us

PD: 1.0 sec

NA: 8

LB: 0.0

Nuts - \$6-15-01-HNMR.fid

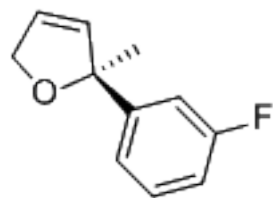

3i

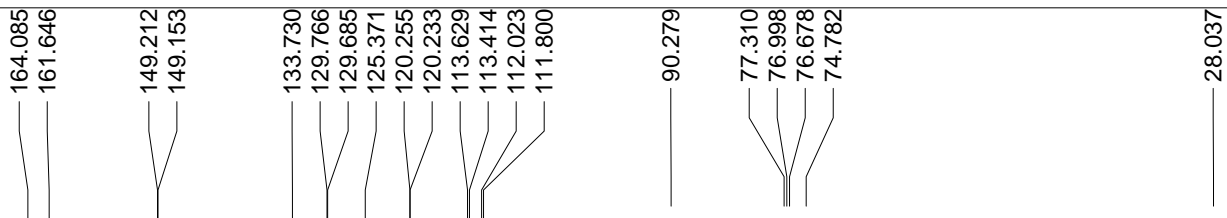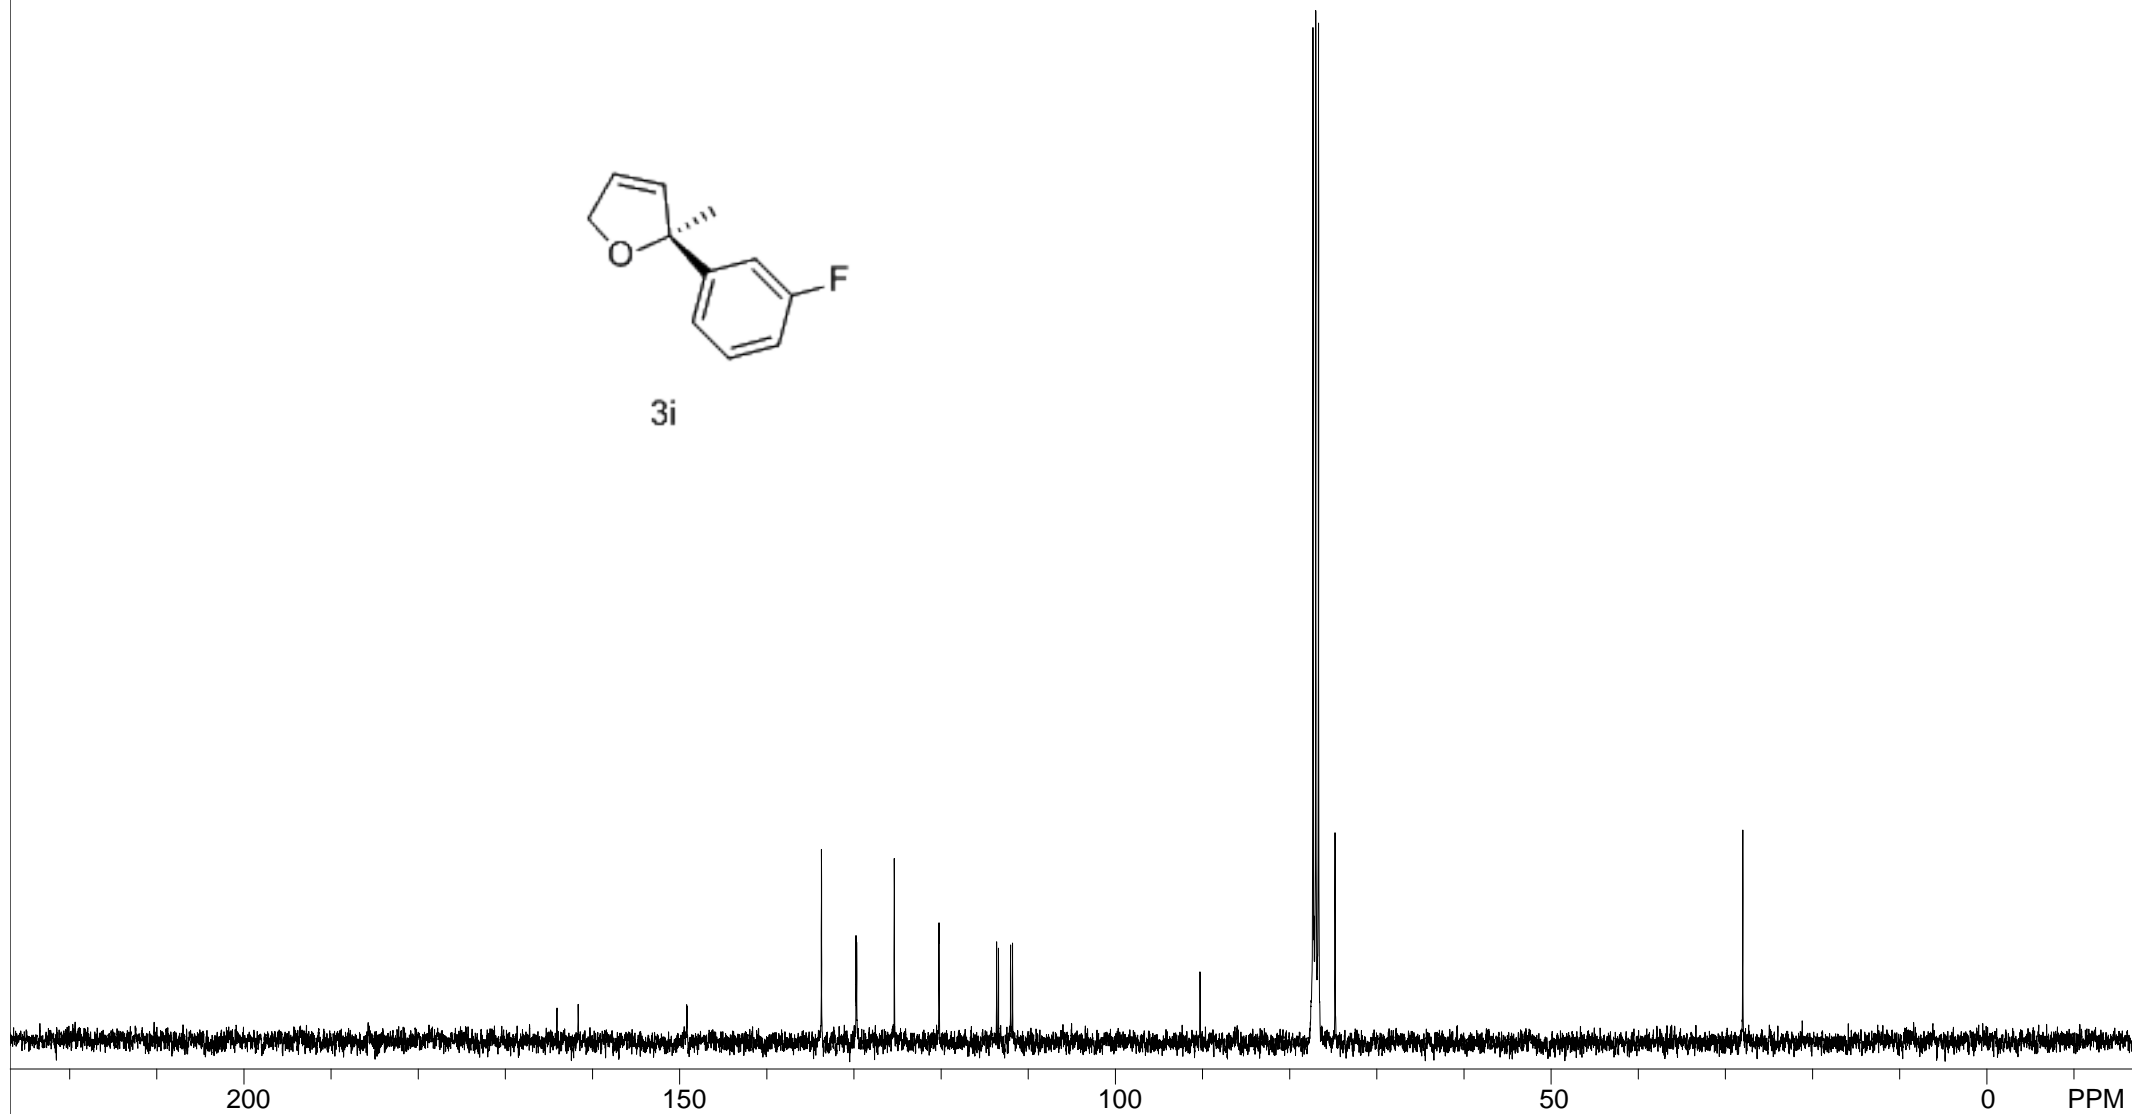

Std carbon:blank line

USER: -- DATE: Feb 2 2015

|             |             |             |              |                      |
|-------------|-------------|-------------|--------------|----------------------|
| F1: 100.598 | F2: 400.031 | SW1: 24510  | OF1: 10561.6 | PTS1d: 31875 , 32768 |
| EX: s2pul   | PW: 4.1 us  | PD: 1.0 sec | NA: 396      | LB: 2.0              |

Nuts - \$6-15-01-CNMR-1.fid

113.044  
113.060  
113.068  
113.084  
113.095  
113.111

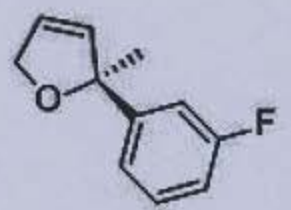

3i

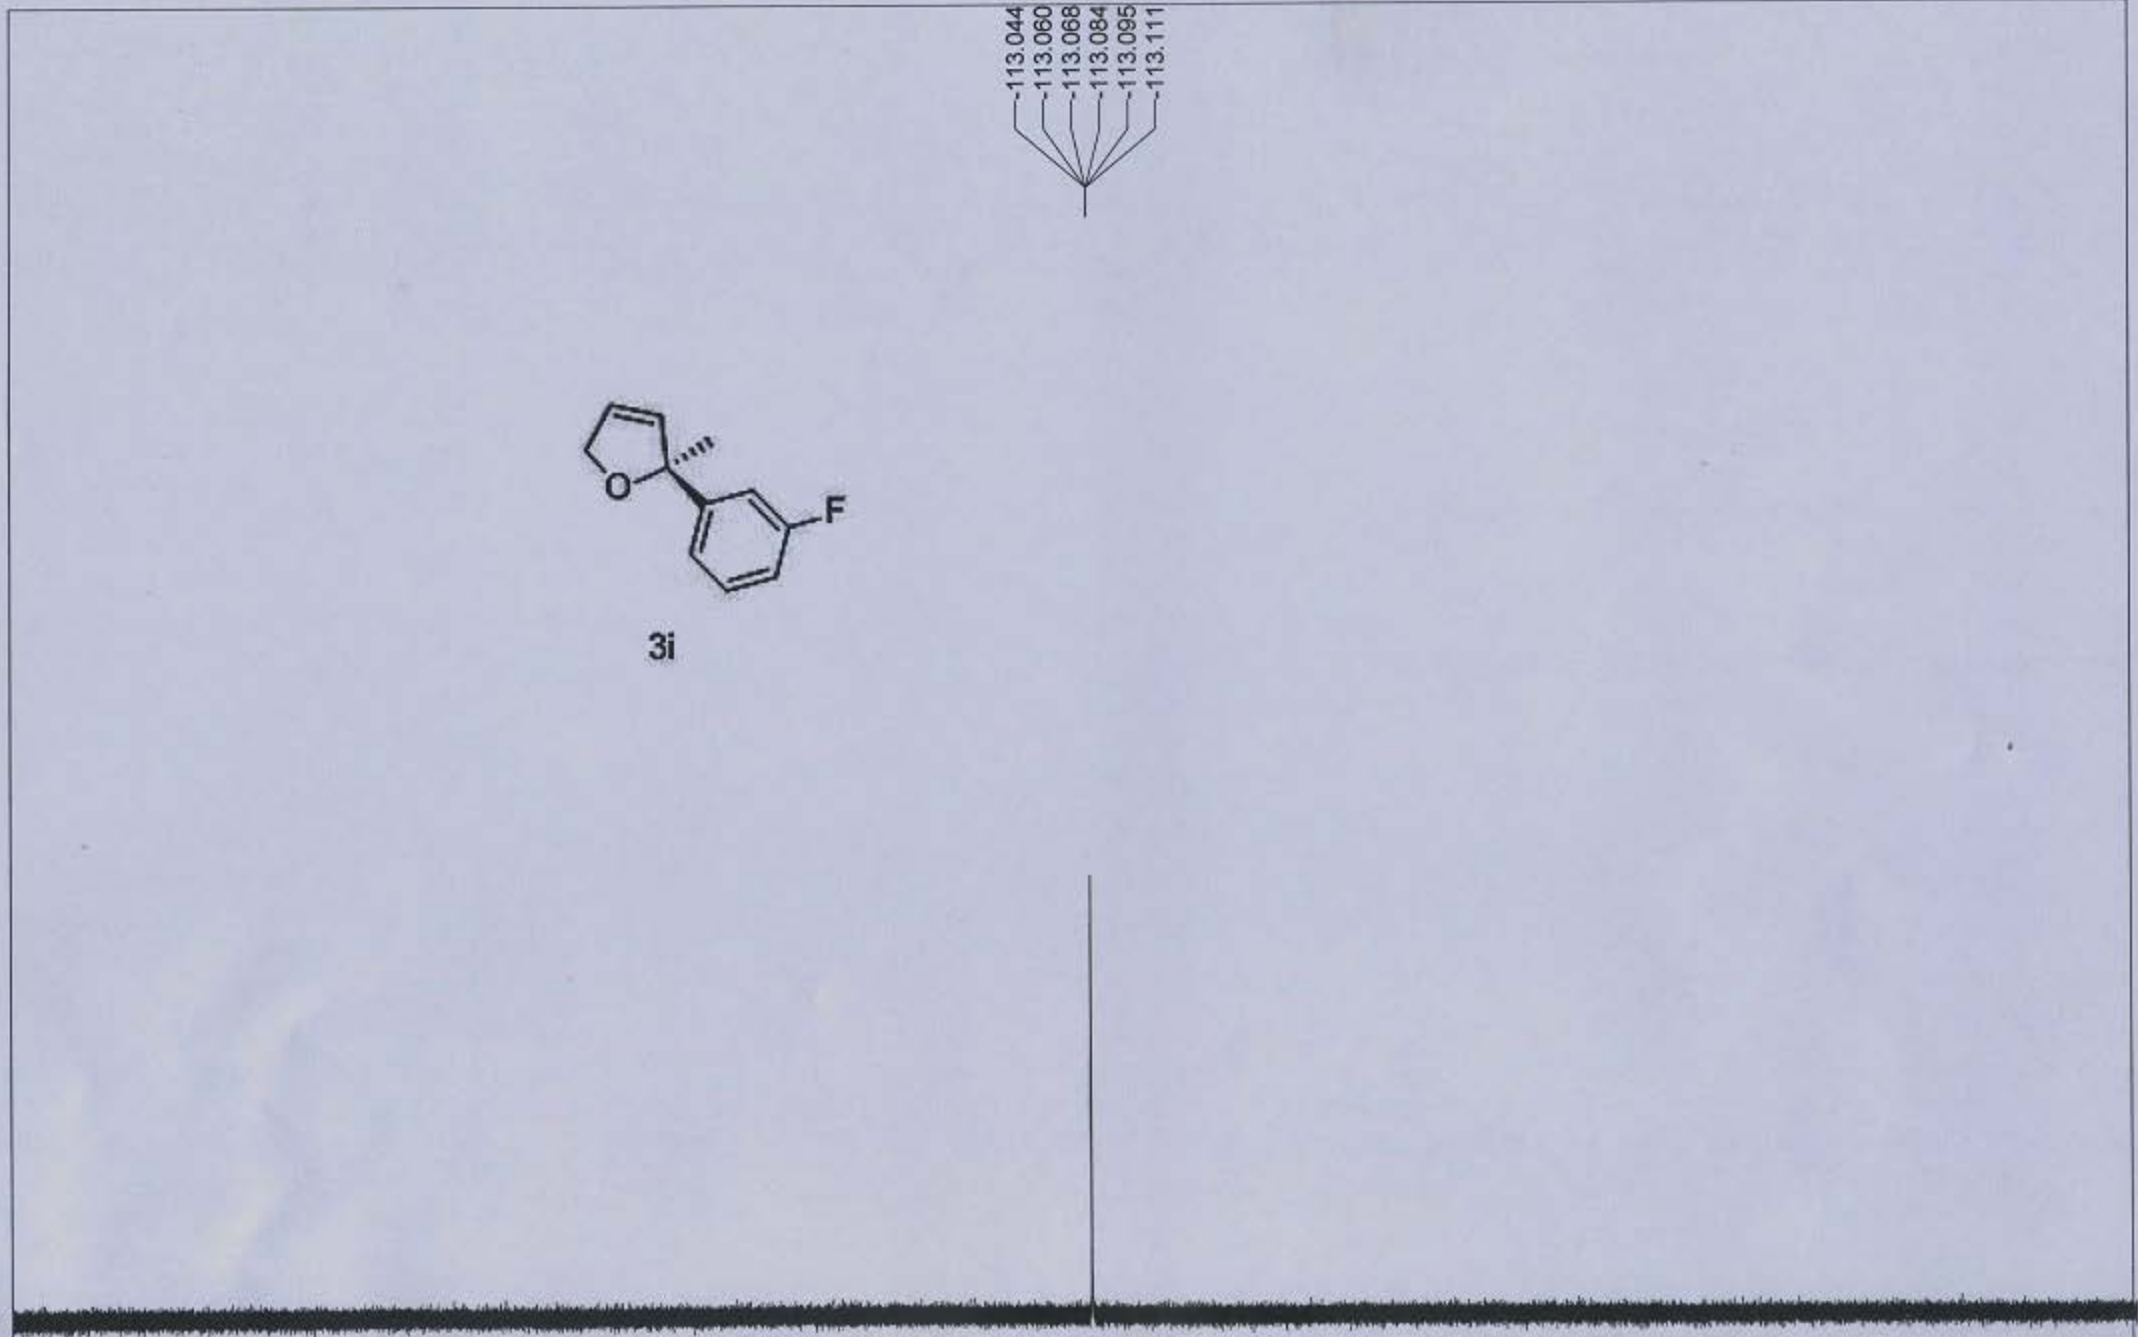

50 0 -50 -100 -150 -200 -250 PPM

=====  
Acq. Operator :  
Sample Operator :  
Acq. Instrument : SFC Location : Vial 7  
Injection Date : 2/4/2015 11:42:53 AM  
Inj Volume : 5.000 µl  
Acq. Method : C:\CHEM32\1\METHODS\AGILENT\_SFC6.M  
Last changed : 2/4/2015 11:32:28 AM by  
(modified after loading)  
Analysis Method : C:\CHEM32\1\METHODS\AGILENT\_SFC6.M  
Last changed : 2/4/2015 4:32:29 PM by  
(modified after loading)  
Additional Info : Peak(s) manually integrated

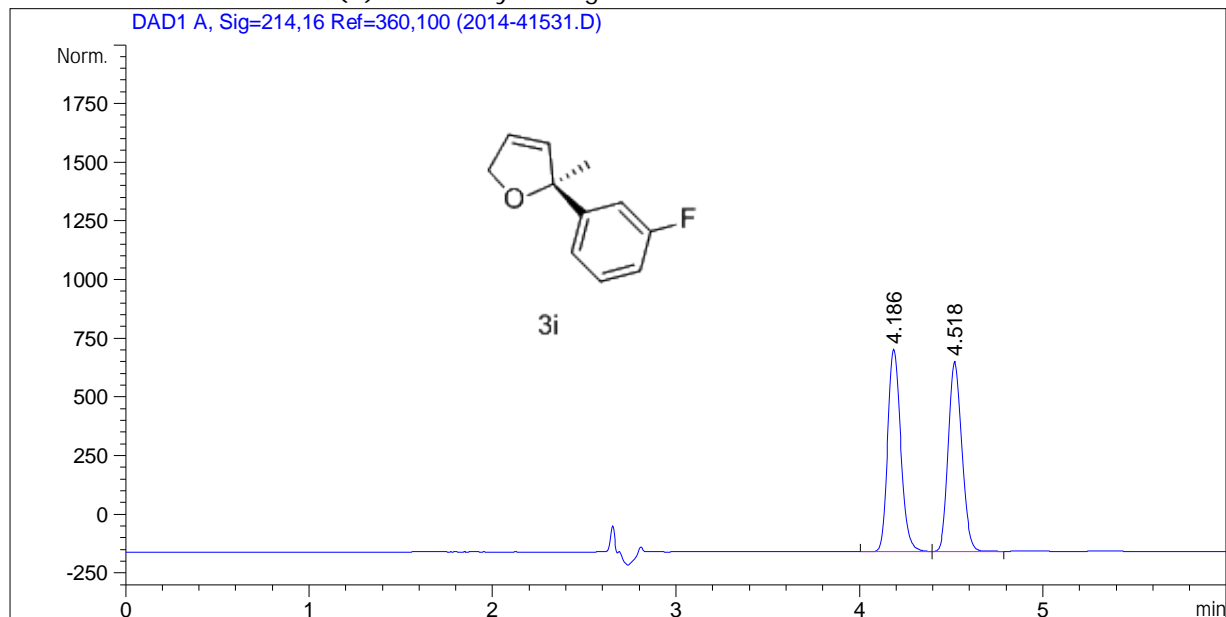

=====  
Area Percent Report  
=====

Sorted By : Signal  
Multiplier : 1.0000  
Dilution : 1.0000  
Do not use Multiplier & Dilution Factor with ISTDs

Signal 1: DAD1 A, Sig=214,16 Ref=360,100

| Peak # | RetTime [min] | Type | Width [min] | Area [mAU*s] | Height [mAU] | Area %  |
|--------|---------------|------|-------------|--------------|--------------|---------|
| 1      | 4.186         | BB   | 0.0766      | 2550.87671   | 516.44244    | 50.2979 |
| 2      | 4.518         | BB   | 0.0805      | 2520.65601   | 485.82999    | 49.7021 |

Totals : 5071.53271 1002.27243

=====  
\*\*\* End of Report \*\*\*

Sample Name: 6-16

```

=====
Acq. Operator   :
Sample Operator :
Acq. Instrument : SFC                               Location : Vial 9
Injection Date  : 2/4/2015 12:36:35 PM
                                           Inj Volume : 5.000 µl
Acq. Method     : C:\CHEM32\1\METHODS\AGILENT_SFC6.M
Last changed    : 2/4/2015 11:32:28 AM by
                  (modified after loading)
Analysis Method : C:\CHEM32\1\METHODS\AGILENT_SFC6.M
Last changed    : 2/4/2015 4:29:25 PM by
                  (modified after loading)
Additional Info : Peak(s) manually integrated
  
```

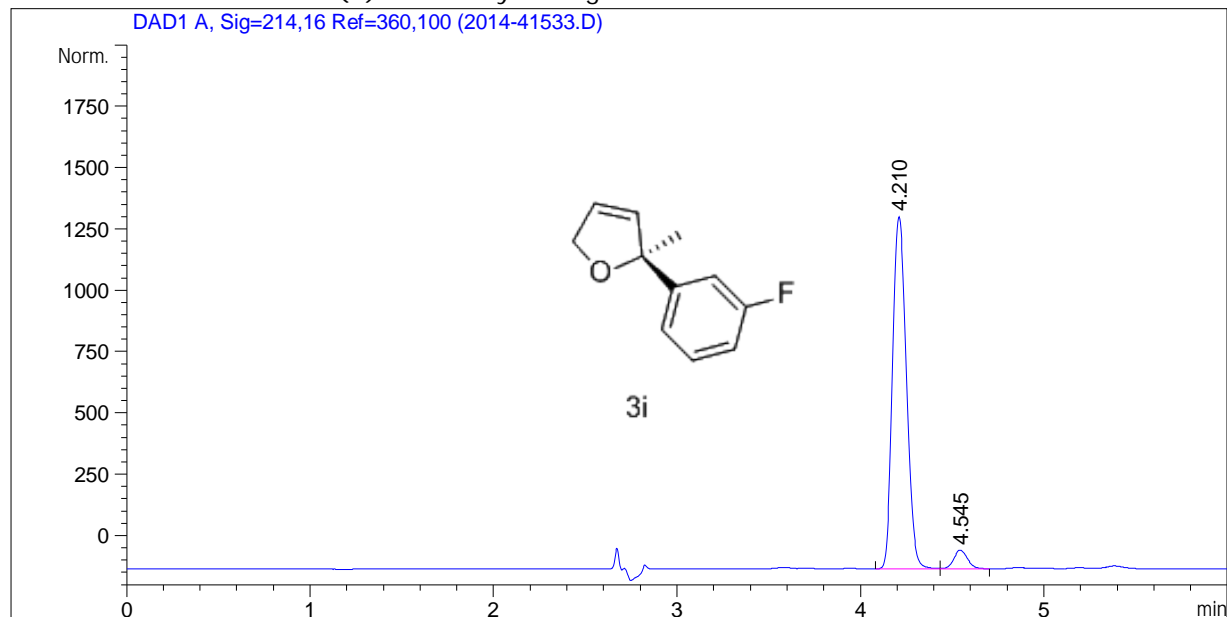

```

=====
                          Area Percent Report
=====
  
```

```

Sorted By      :      Signal
Multiplier     :      1.0000
Dilution      :      1.0000
Do not use Multiplier & Dilution Factor with ISTDs
  
```

Signal 1: DAD1 A, Sig=214,16 Ref=360,100

| Peak # | RetTime [min] | Type | Width [min] | Area [mAU*s] | Height [mAU] | Area %  |
|--------|---------------|------|-------------|--------------|--------------|---------|
| 1      | 4.210         | BV   | 0.0834      | 6065.49072   | 1151.68140   | 95.1083 |
| 2      | 4.545         | VB   | 0.0788      | 311.96765    | 60.86369     | 4.8917  |

```
Totals :                6377.45837 1212.54509
```

```

=====
*** End of Report ***
  
```

7.628  
7.603  
7.584  
7.260  
7.240  
7.221  
7.206  
7.188  
7.133  
7.115  
7.096  
7.030  
7.006  
6.998  
6.978  
6.273  
6.267  
6.261  
6.257  
6.251  
6.246  
6.241  
6.235  
5.841  
5.826  
4.816  
4.782  
4.694  
4.664

1.656

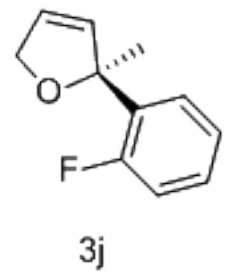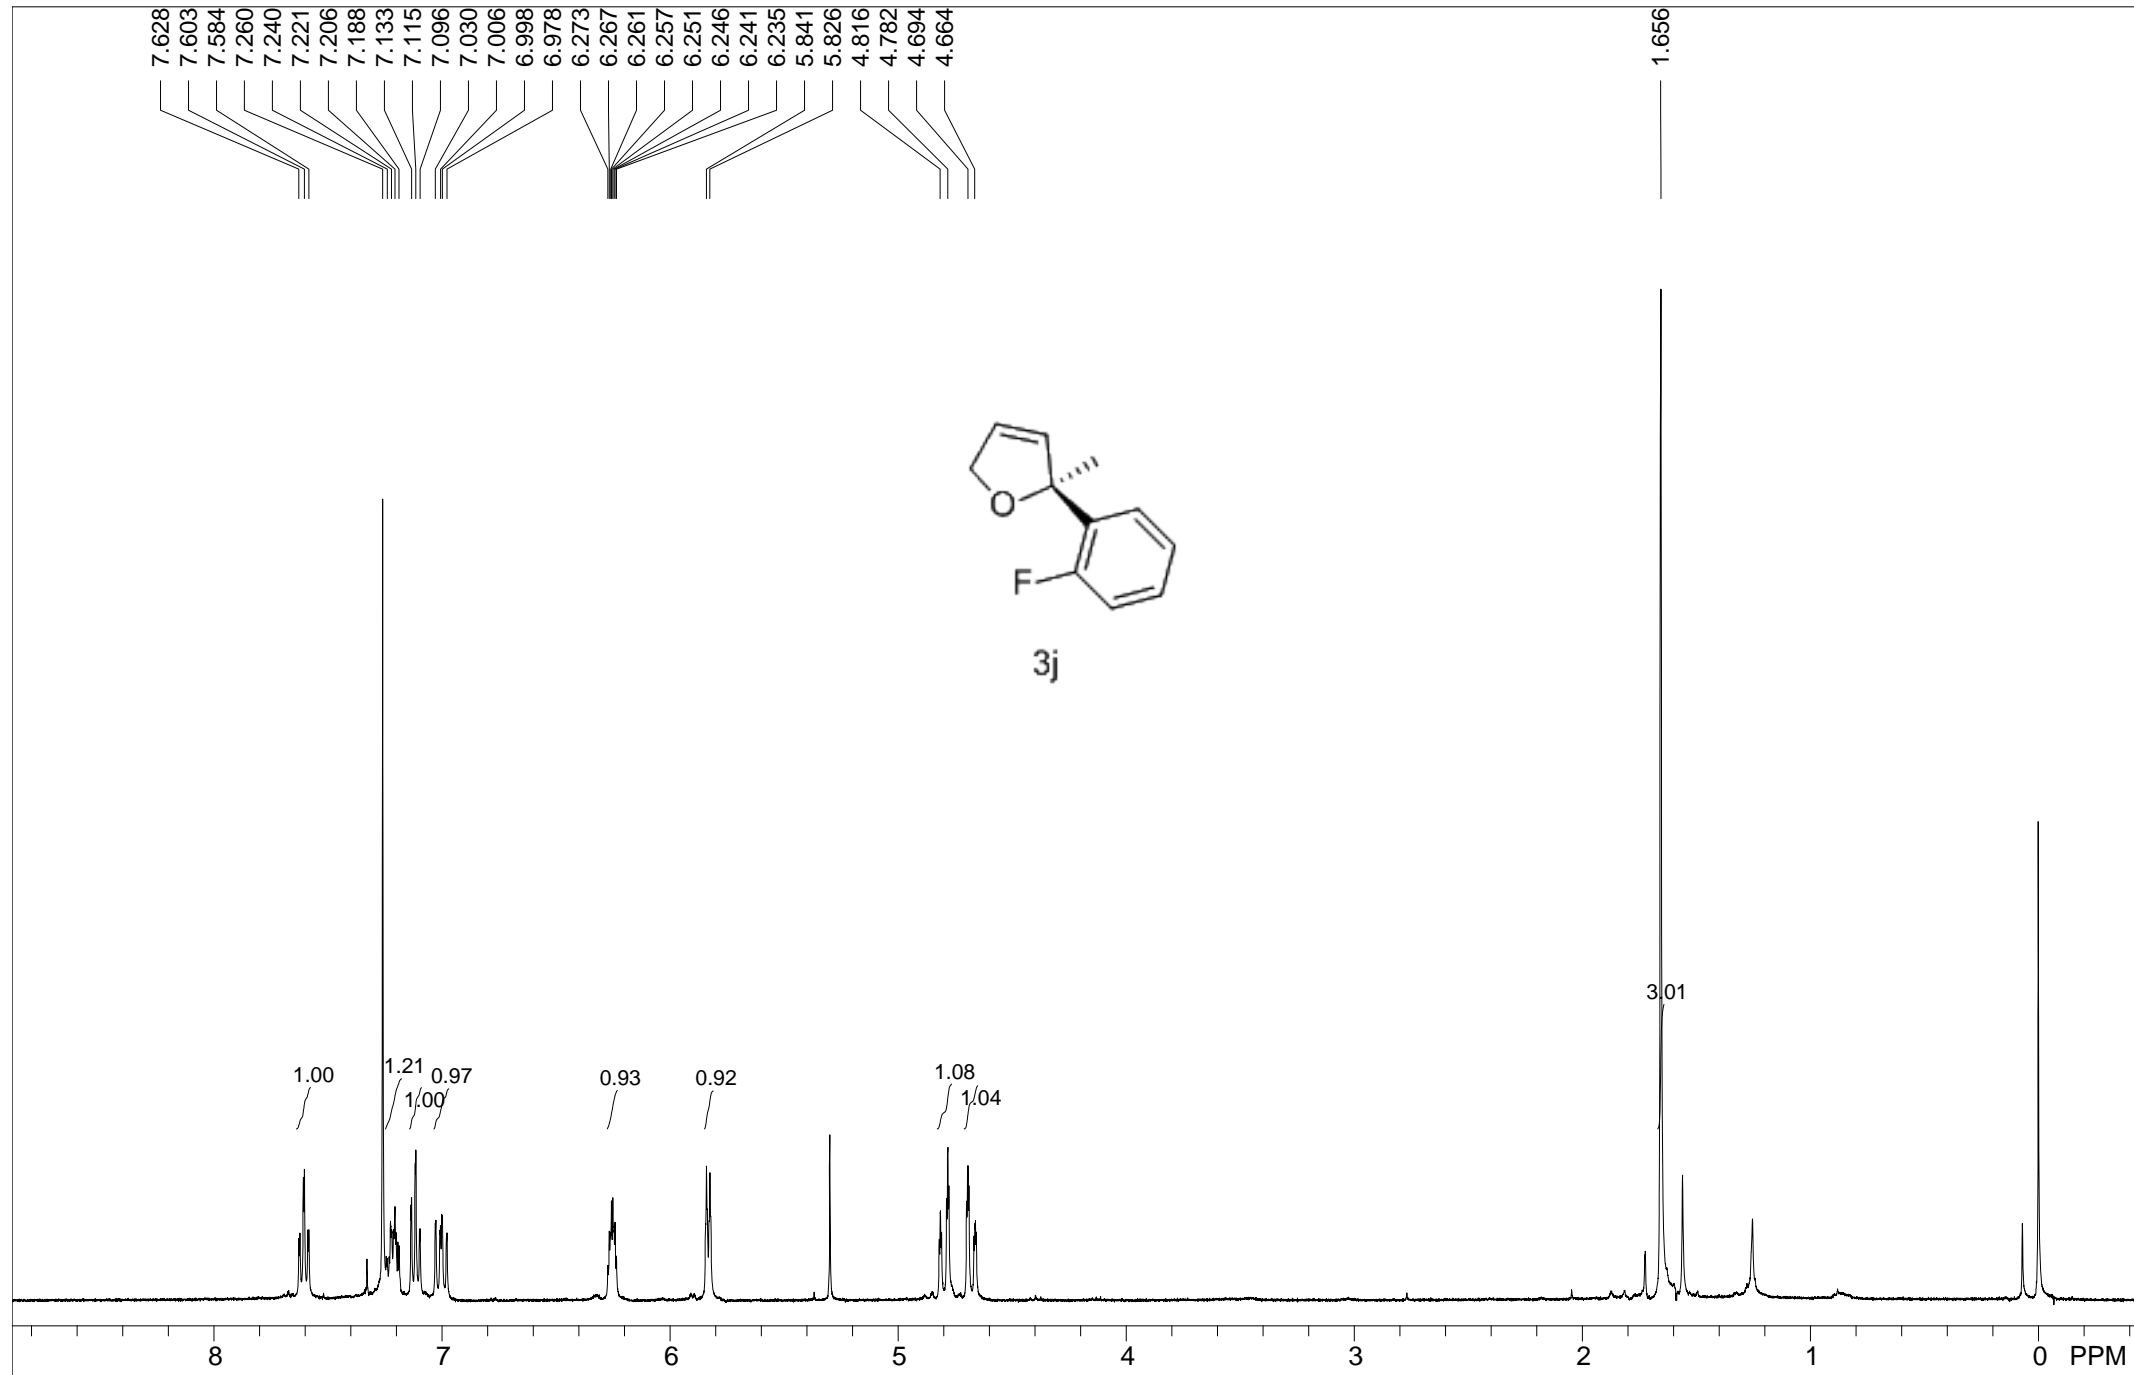

|                       |             |             |  |                           |         |                           |  |
|-----------------------|-------------|-------------|--|---------------------------|---------|---------------------------|--|
| Std proton;blank line |             |             |  | USER: -- DATE: Feb 2 2015 |         |                           |  |
| F1: 400.032           | F2: 100.597 | SW1: 7225   |  | OF1: 2807.3               |         | PTS1d: 21676 , 32768      |  |
| EX: s2pul             | PW: 10.6 us | PD: 1.0 sec |  | NA: 8                     | LB: 0.0 | Nuts - \$6-14-01-HNMR.fid |  |

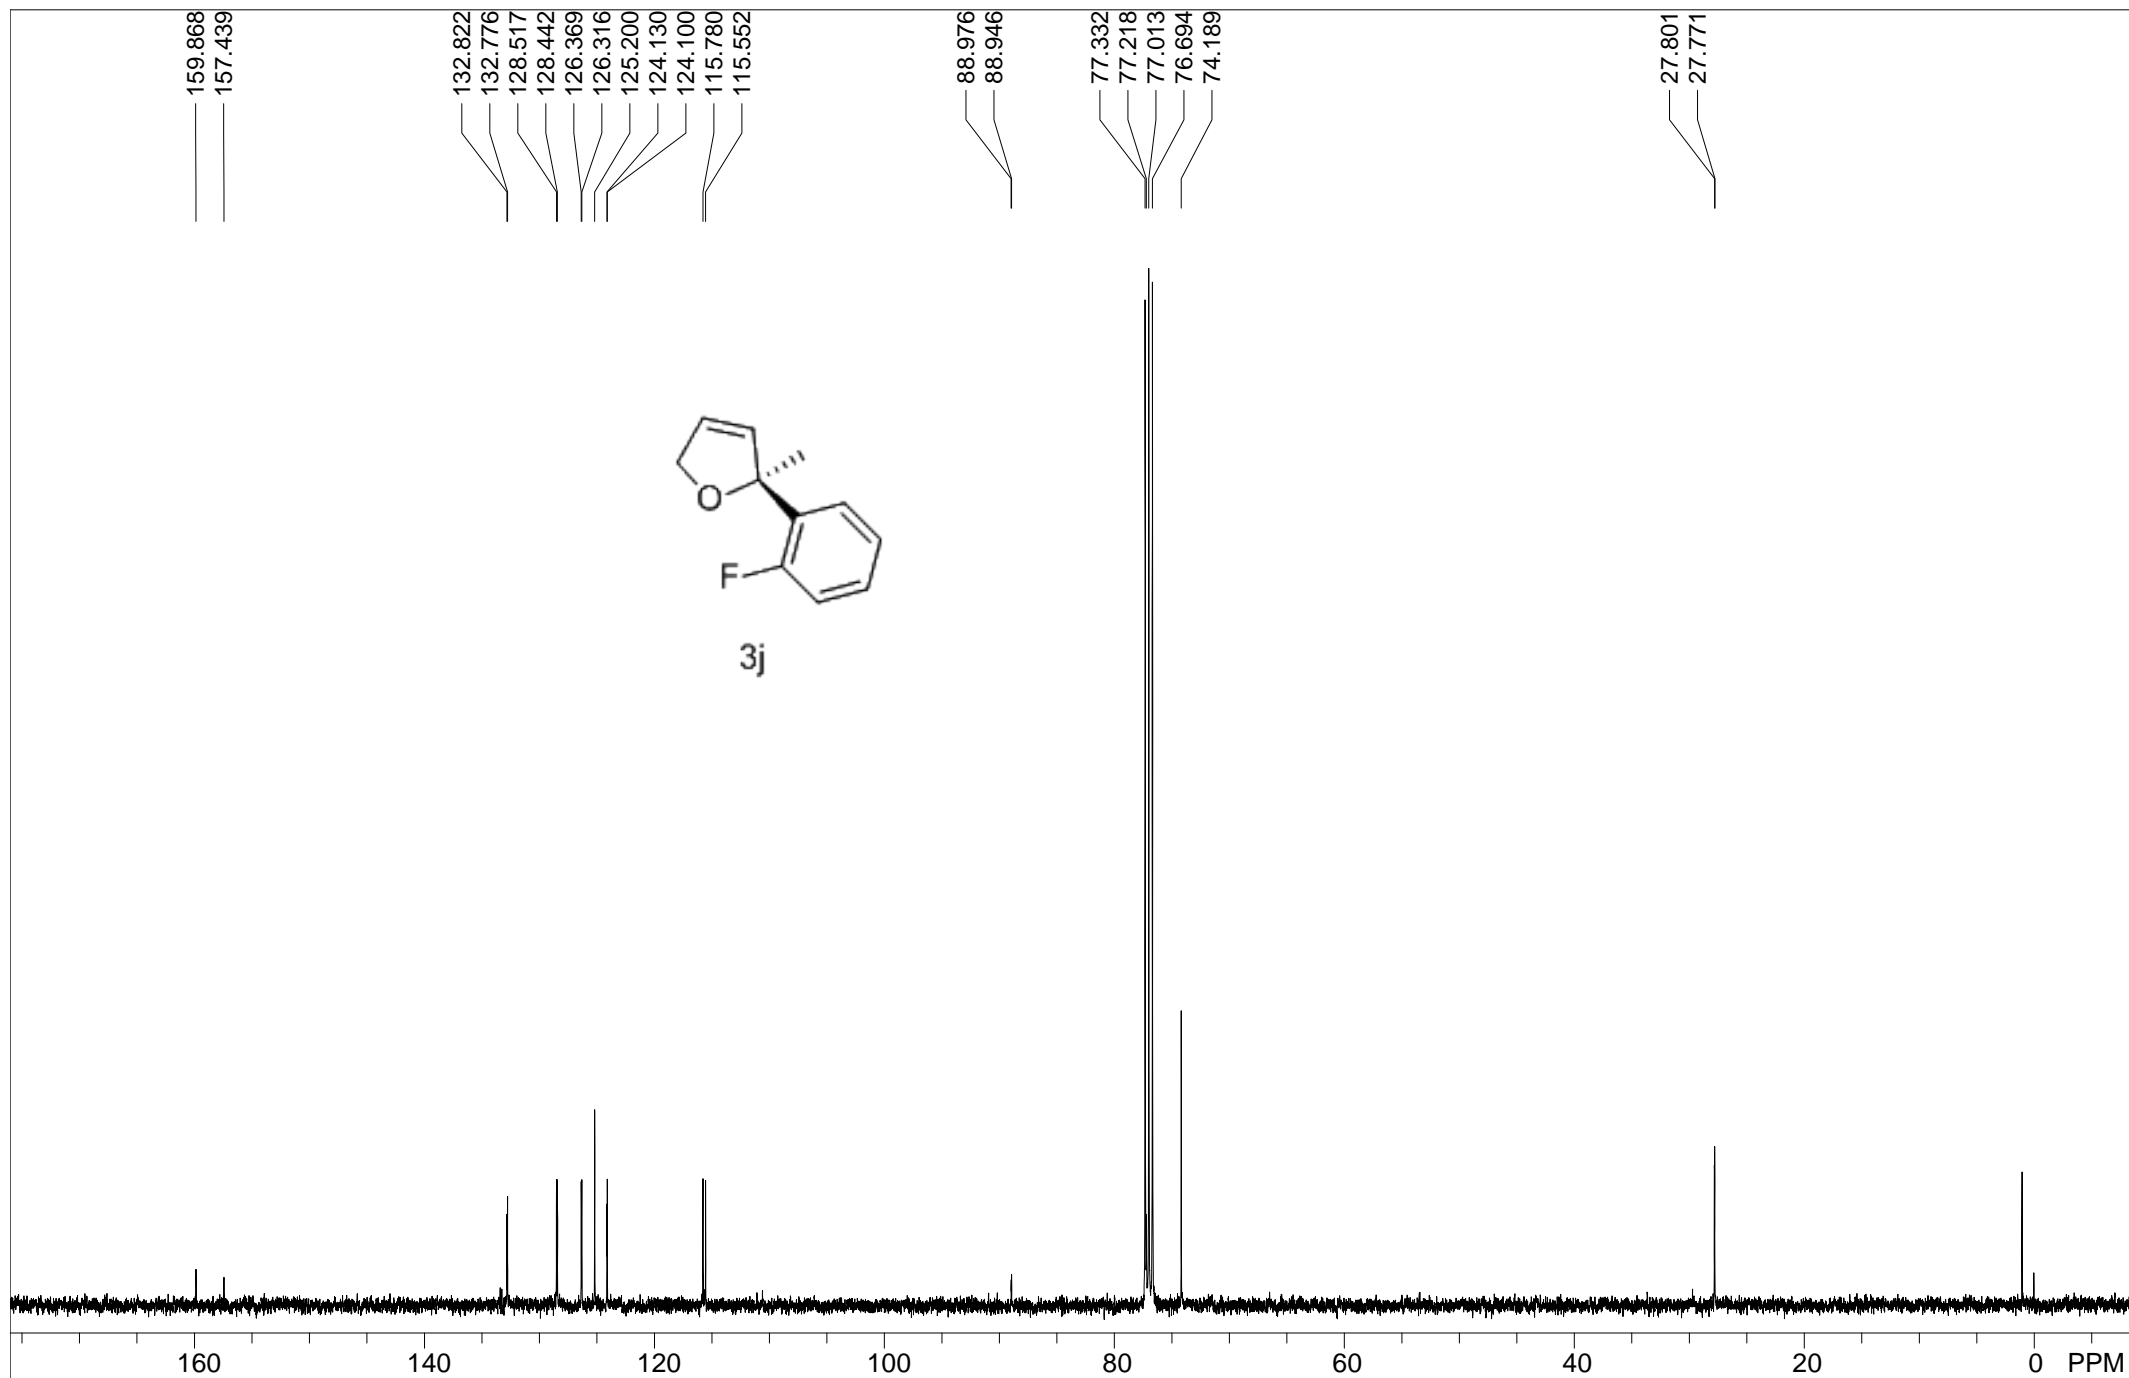

new experiment

USER: -- DATE: Feb 6 2015

|             |             |             |              |                      |
|-------------|-------------|-------------|--------------|----------------------|
| F1: 100.521 | F2: 399.722 | SW1: 25000  | OF1: 11056.0 | PTS1d: 32768 , 32768 |
| EX: s2pul   | PW: 4.9 us  | PD: 1.0 sec | NA: 908      | LB: 1.0              |

Nuts - \$6-18-01-CNMR-7.fid

-114.776  
-114.796  
-114.806  
-114.827

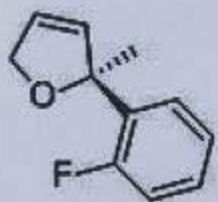

3j

50 0 -50 -100 -150 -200 PPM

STANDARD PROTON PARAMETERS

S-56

USER: -- DATE: Feb 8 2015

F1: 376.064

F2: 100.519

SW1: 166667

OF1: -48255.3

PTS1d: 166667 , 262144



=====  
Acq. Operator :  
Sample Operator :  
Acq. Instrument : SFC Location : Vial 44  
Injection Date : 2/5/2015 3:21:23 PM Inj Volume : 5.000 µl  
Acq. Method : C:\CHEM32\1\METHODS\AGILENT\_SFC6.M  
Last changed : 2/5/2015 3:13:07 PM by  
(modified after loading)  
Analysis Method : C:\CHEM32\1\METHODS\AGILENT\_SFC6.M  
Last changed : 2/5/2015 4:04:34 PM by  
(modified after loading)  
Additional Info : Peak(s) manually integrated

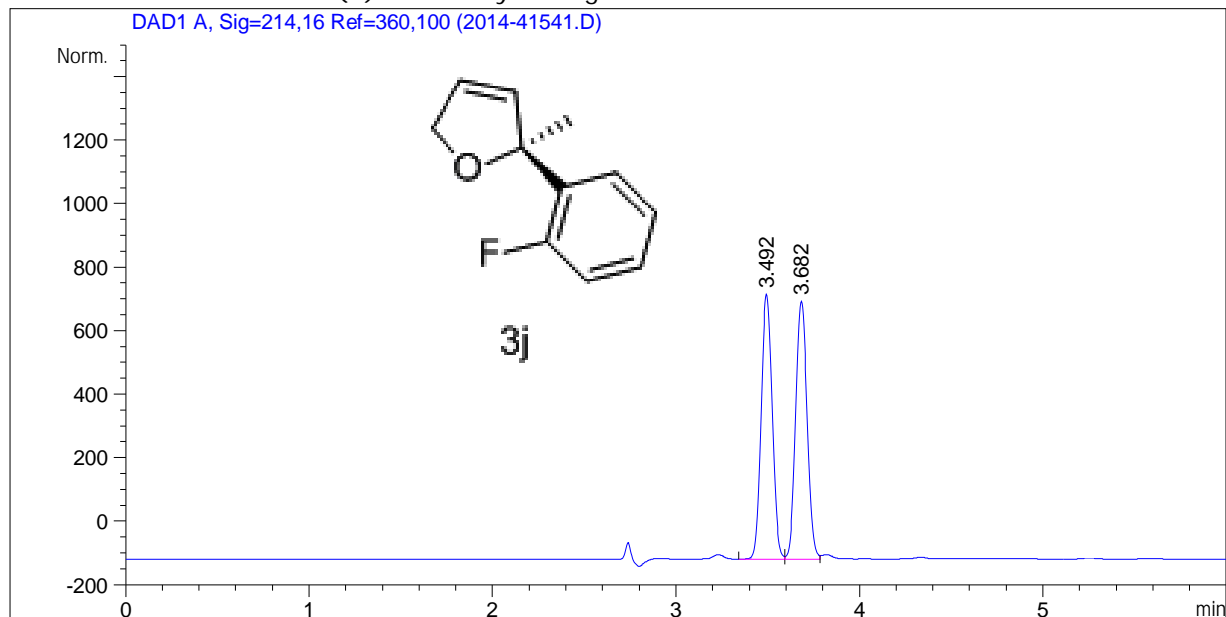

=====  
Area Percent Report  
=====

Sorted By : Signal  
Multiplier : 1.0000  
Dilution : 1.0000  
Do not use Multiplier & Dilution Factor with ISTDs

Signal 1: DAD1 A, Sig=214,16 Ref=360,100

| Peak # | RetTime [min] | Type | Width [min] | Area [mAU*s] | Height [mAU] | Area %  |
|--------|---------------|------|-------------|--------------|--------------|---------|
| 1      | 3.492         | BV   | 0.0662      | 2473.24927   | 586.46735    | 49.8405 |
| 2      | 3.682         | VV   | 0.0678      | 2489.08276   | 571.31604    | 50.1595 |

Totals : 4962.33203 1157.78339

=====  
\*\*\* End of Report \*\*\*

Sample Name: 6-18

```

=====
Acq. Operator   :
Sample Operator :
Acq. Instrument : SFC                               Location : Vial 43
Injection Date  : 2/5/2015 3:54:45 PM
                                           Inj Volume : 5.000 µl
Acq. Method     : C:\CHEM32\1\METHODS\AGILENT_SFC6.M
Last changed    : 2/5/2015 3:13:07 PM by :
                  (modified after loading)
Analysis Method : C:\CHEM32\1\METHODS\AGILENT_SFC6.M
Last changed    : 2/5/2015 4:06:38 PM by
                  (modified after loading)
Additional Info : Peak(s) manually integrated
  
```

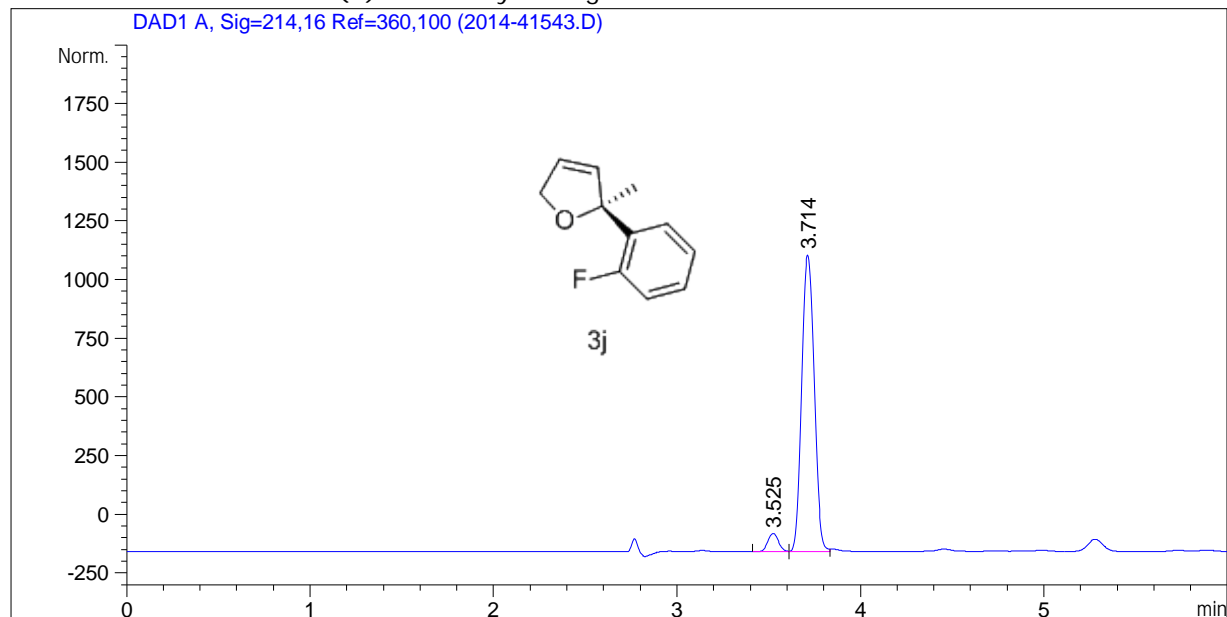

```

=====
                          Area Percent Report
=====
  
```

```

Sorted By           :      Signal
Multiplier          :      1.0000
Dilution            :      1.0000
Do not use Multiplier & Dilution Factor with ISTDs
  
```

Signal 1: DAD1 A, Sig=214,16 Ref=360,100

| Peak # | RetTime [min] | Type | Width [min] | Area [mAU*s] | Height [mAU] | Area %  |
|--------|---------------|------|-------------|--------------|--------------|---------|
| 1      | 3.525         | BV   | 0.0632      | 233.16054    | 57.68032     | 4.9614  |
| 2      | 3.714         | VV   | 0.0765      | 4466.35303   | 938.75061    | 95.0386 |

```
Totals :                4699.51357  996.43093
```

```

=====
*** End of Report ***
  
```

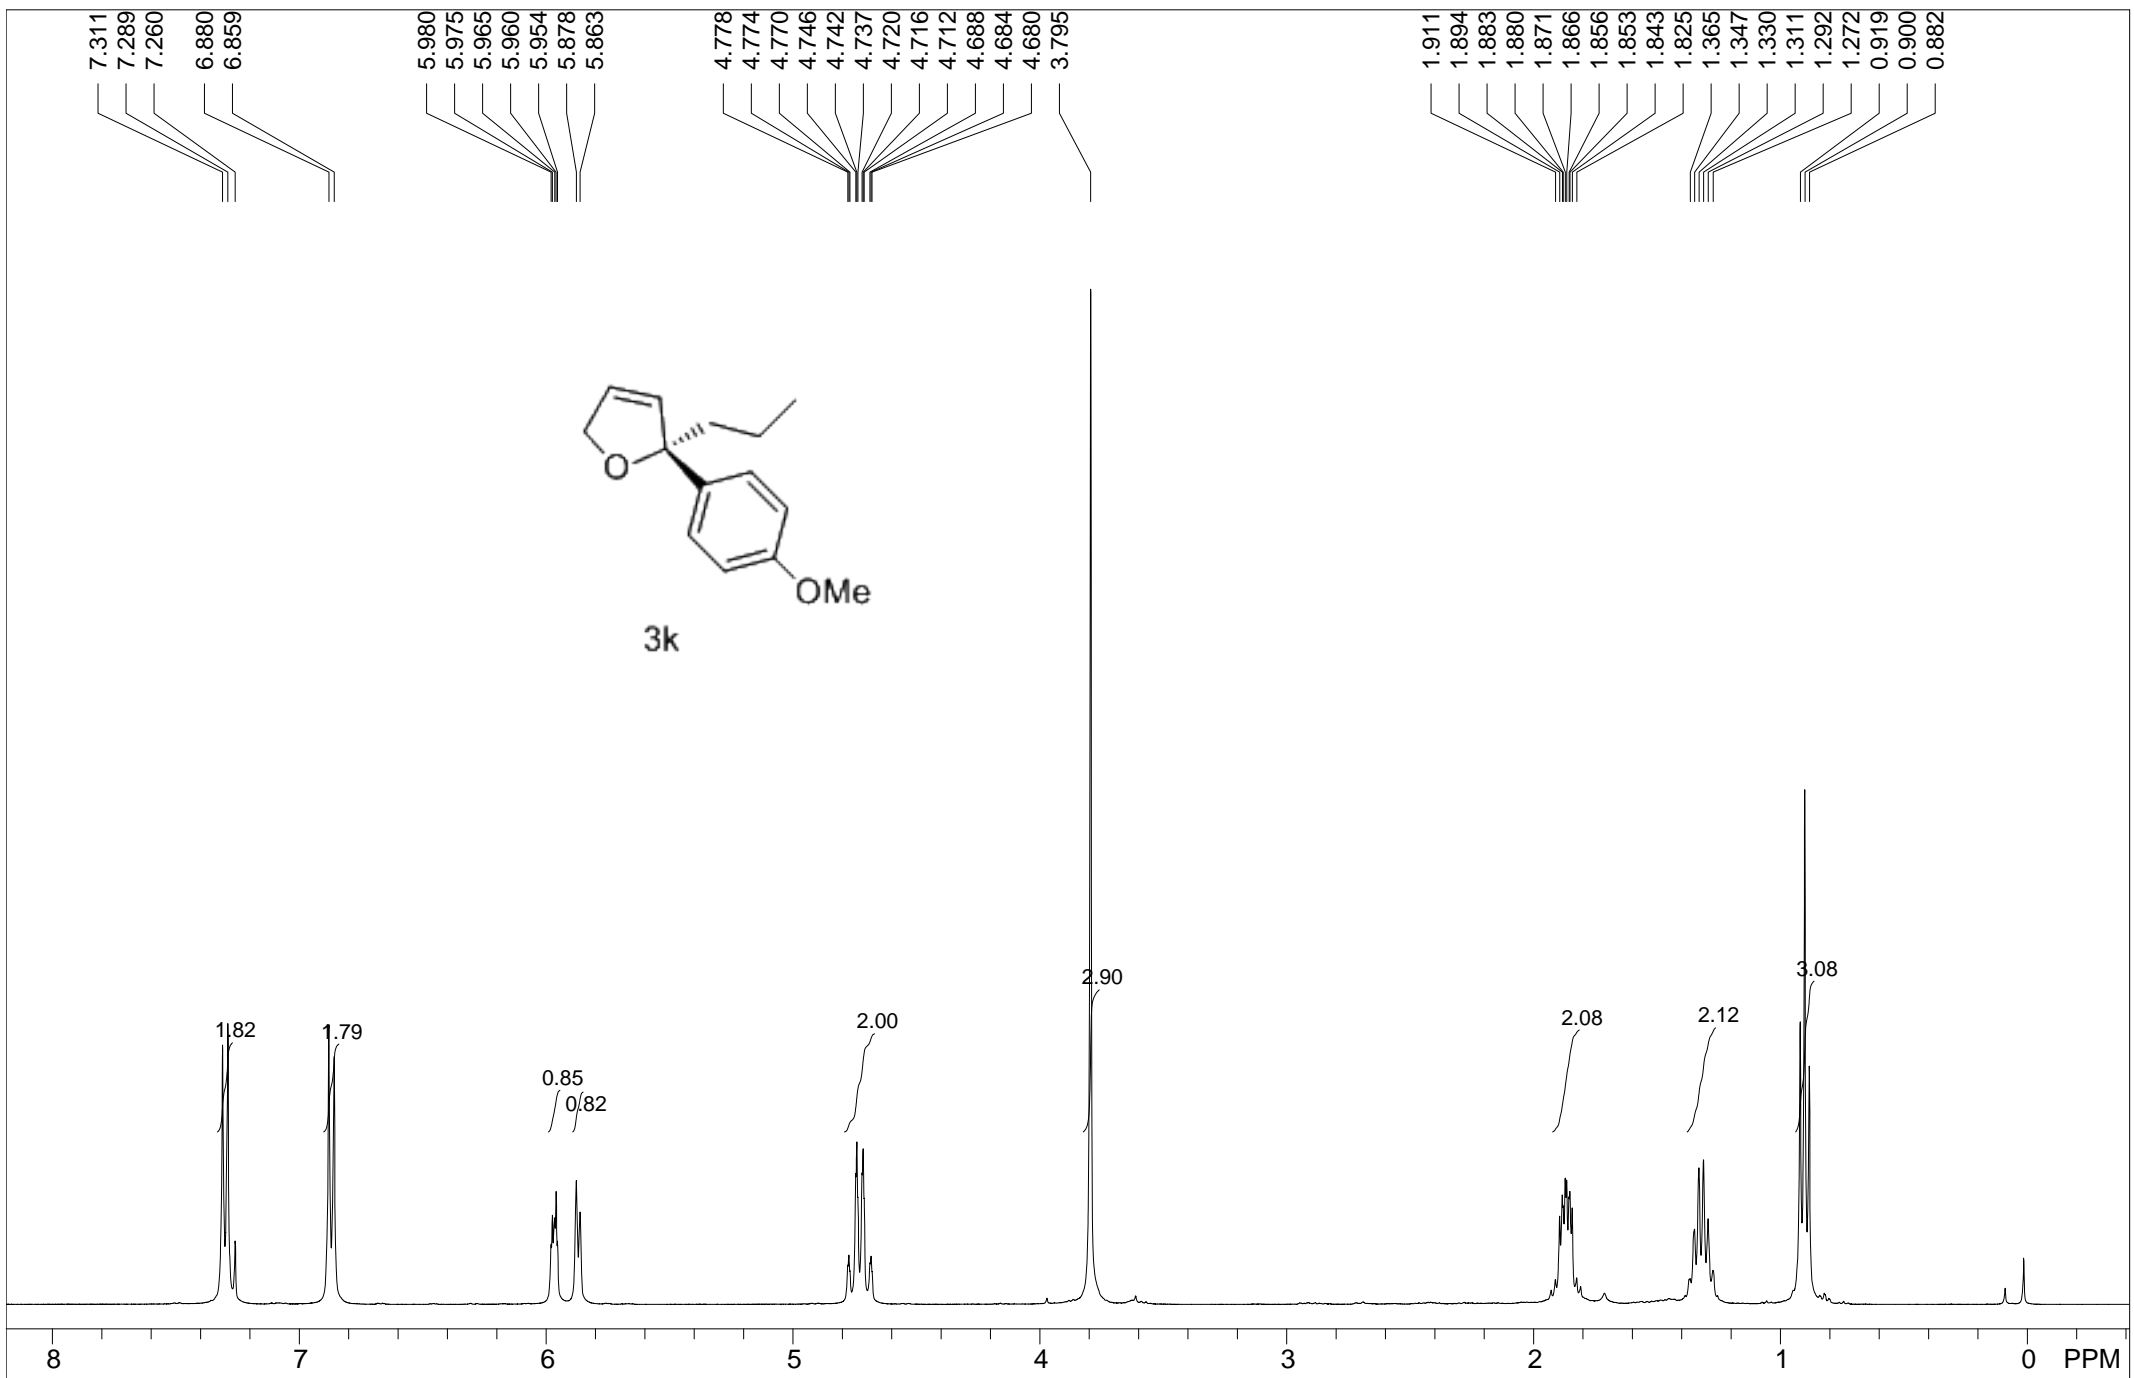

Std proton:blank line

USER: -- DATE: Dec 2 2014

|             |             |             |             |                      |
|-------------|-------------|-------------|-------------|----------------------|
| F1: 400.031 | F2: 100.597 | SW1: 6510   | OF1: 2407.4 | PTS1d: 19531 , 32768 |
| EX: s2pul   | PW: 10.6 us | PD: 1.0 sec | NA: 12      | LB: 0.0              |

Nuts - \$4-53-01-HNMR.fid

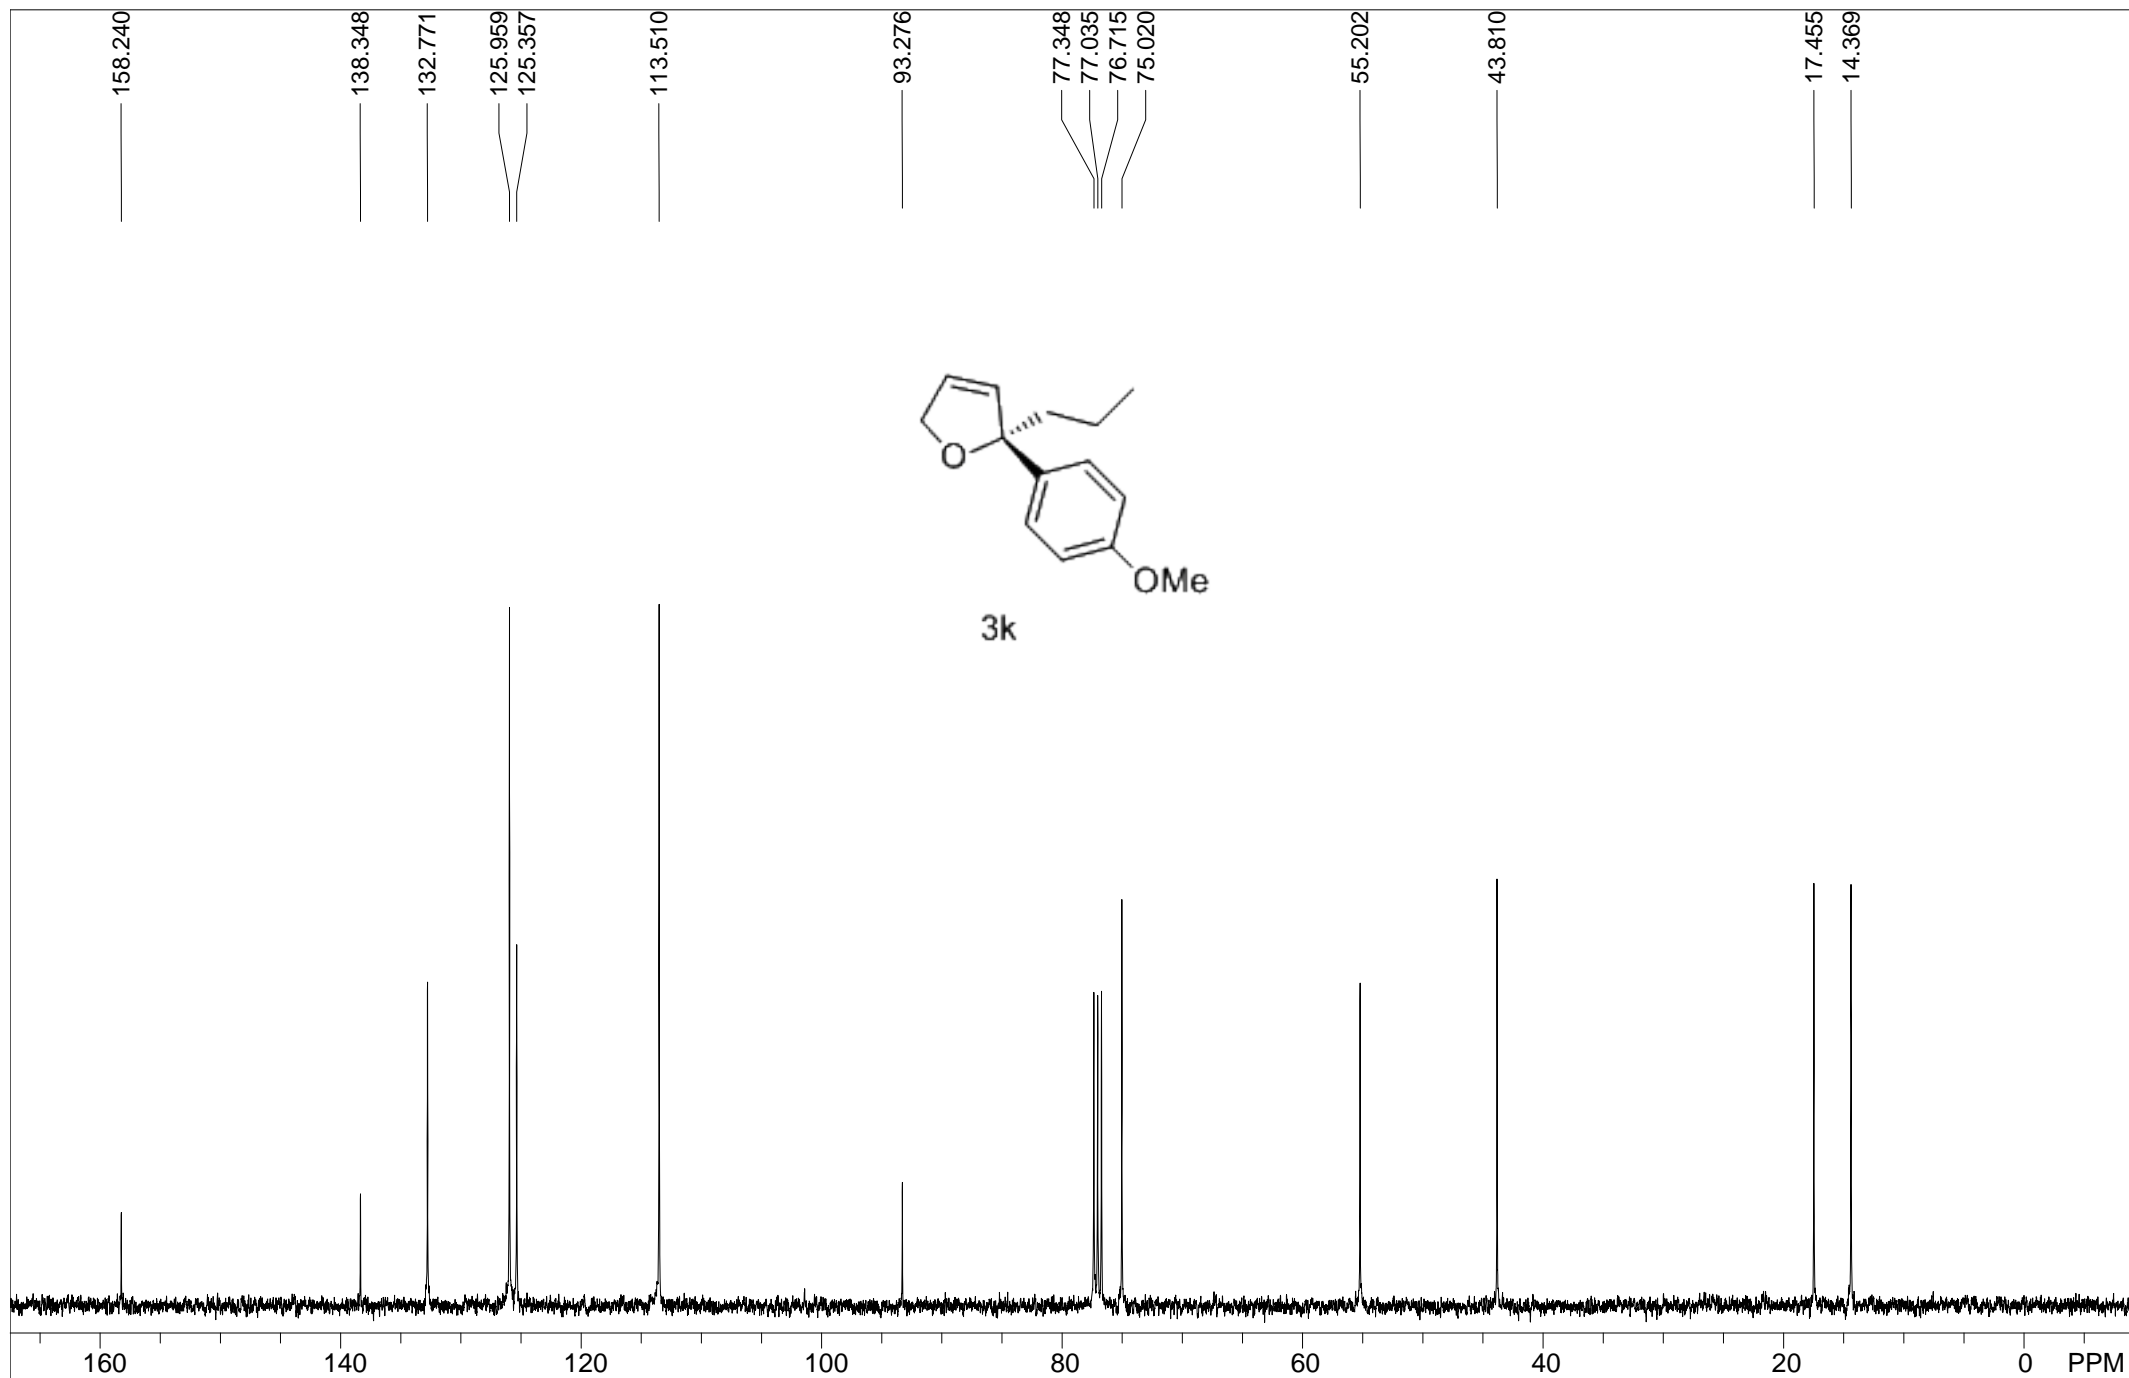

|                       |             |             |  |                           |         |                             |  |
|-----------------------|-------------|-------------|--|---------------------------|---------|-----------------------------|--|
| Std carbon;blank line |             |             |  | USER: -- DATE: Dec 2 2014 |         |                             |  |
| F1: 100.598           | F2: 400.031 | SW1: 24510  |  | OF1: 10561.6              |         | PTS1d: 31875 , 32768        |  |
| EX: s2pul             | PW: 4.1 us  | PD: 1.0 sec |  | NA: 84                    | LB: 2.0 | Nuts - \$4-53-01-CNMR-2.fid |  |

# ==== Shimadzu LCsolution Analysis Report ====

D:\LabSolutions\Data\Project1\ZQS\4-43-01.lcd

Acquired by : Admin  
 Sample Name : 4-43-01  
 Sample ID : OD-H,99.0/1.0,1.0,214  
 Vial # : 0  
 Injection Volume : 10 uL  
 Data File Name : 4-43-01.lcd  
 Method File Name : 1234.lcm  
 Batch File Name :  
 Report File Name : Default.lcr  
 Data Acquired : 2013-11-4 12:16:57  
 Data Processed : 2013-12-9 0:11:26

## <Chromatogram>

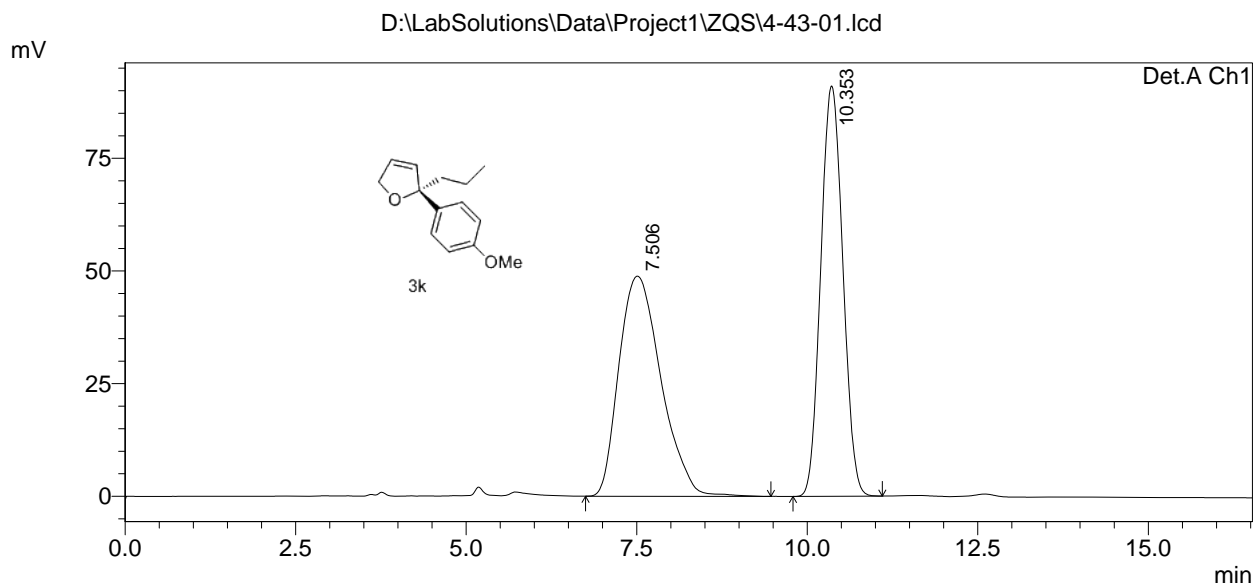

PeakTable

Detector A Ch1 214nm

| Peak# | Ret. Time | Area    | Height | Area %  |
|-------|-----------|---------|--------|---------|
| 1     | 7.506     | 2096726 | 48861  | 50.541  |
| 2     | 10.353    | 2051832 | 91080  | 49.459  |
| Total |           | 4148557 | 139940 | 100.000 |

# ==== Shimadzu LCsolution Analysis Report ====

D:\LabSolutions\Data\Project1\ZQS\4-75-01.lcd

Acquired by : Admin  
 Sample Name : 4-75-01  
 Sample ID : OD-H,99.0/1.0,1.0,254  
 Vail # : 0  
 Injection Volume : 10 uL  
 Data File Name : 4-75-01.lcd  
 Method File Name : 1234.lcm  
 Batch File Name :  
 Report File Name : Default.lcr  
 Data Acquired : 2013-11-18 20:47:12  
 Data Processed : 2013-11-18 21:01:36

## <Chromatogram>

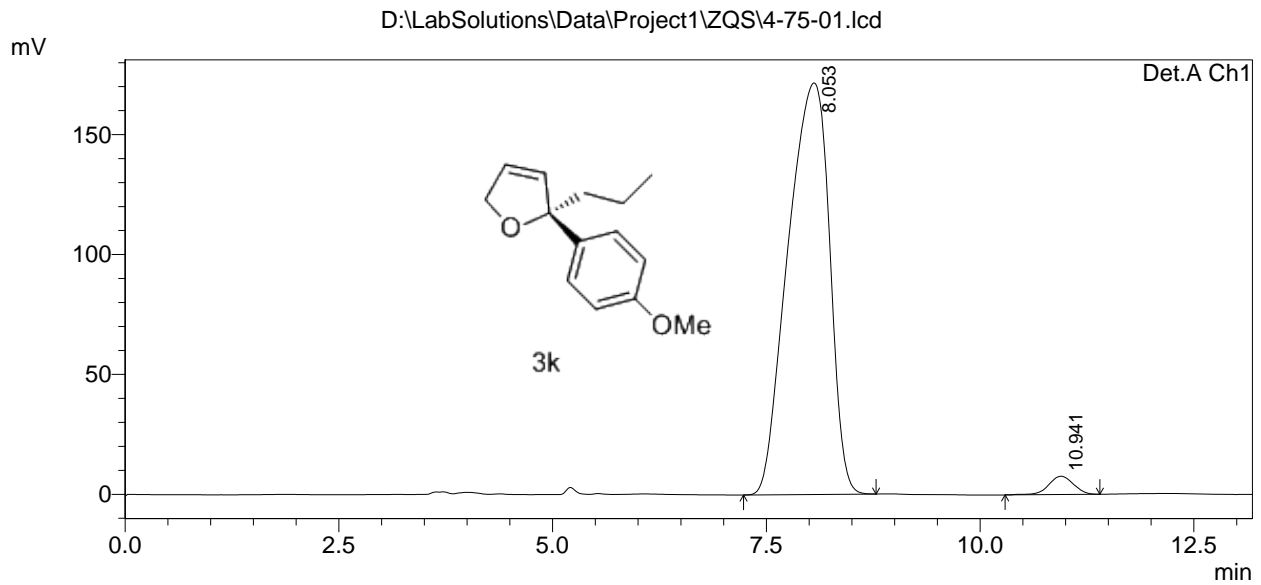

1 Det.A Ch1/214nm

PeakTable

Detector A Ch1 214nm

| Peak# | Ret. Time | Area    | Height | Area %  |
|-------|-----------|---------|--------|---------|
| 1     | 8.053     | 5806209 | 171635 | 97.403  |
| 2     | 10.941    | 154838  | 7652   | 2.597   |
| Total |           | 5961047 | 179287 | 100.000 |

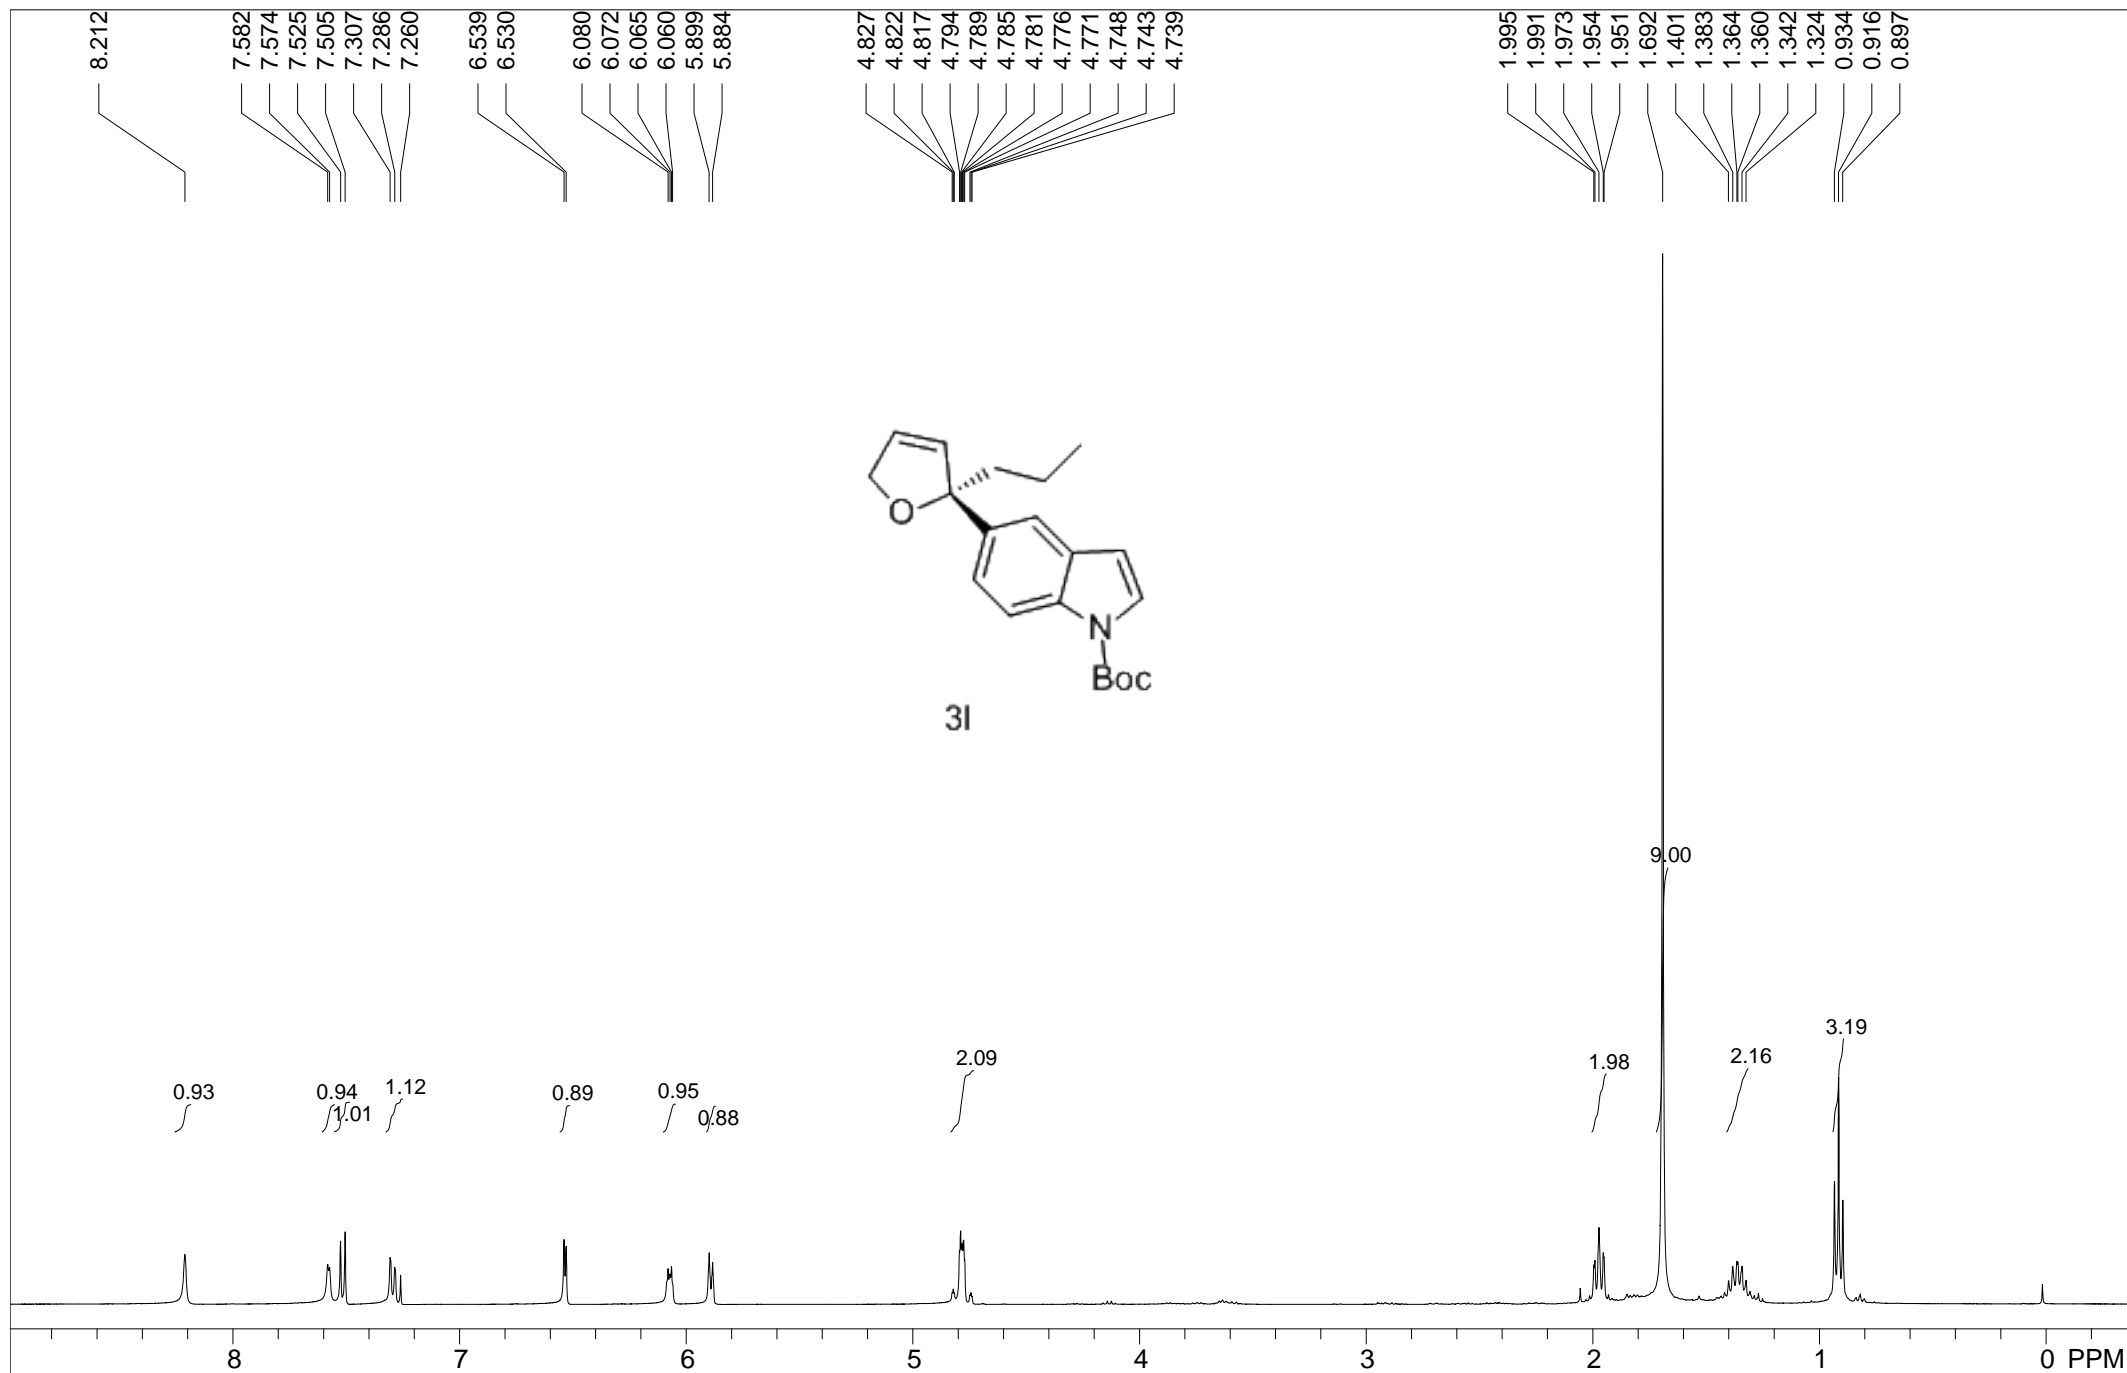

Std proton;blank line

USER: -- DATE: Dec 30 2014

F1: 400.032

F2: 100.597

SW1: 7310

OF1: 2807.8

PTS1d: 21930 , 32768

EX: s2pul

PW: 10.6 us

PD: 1.0 sec

NA: 8

LB: 0.0

Nuts - \$5-54-01-HNMR.fid

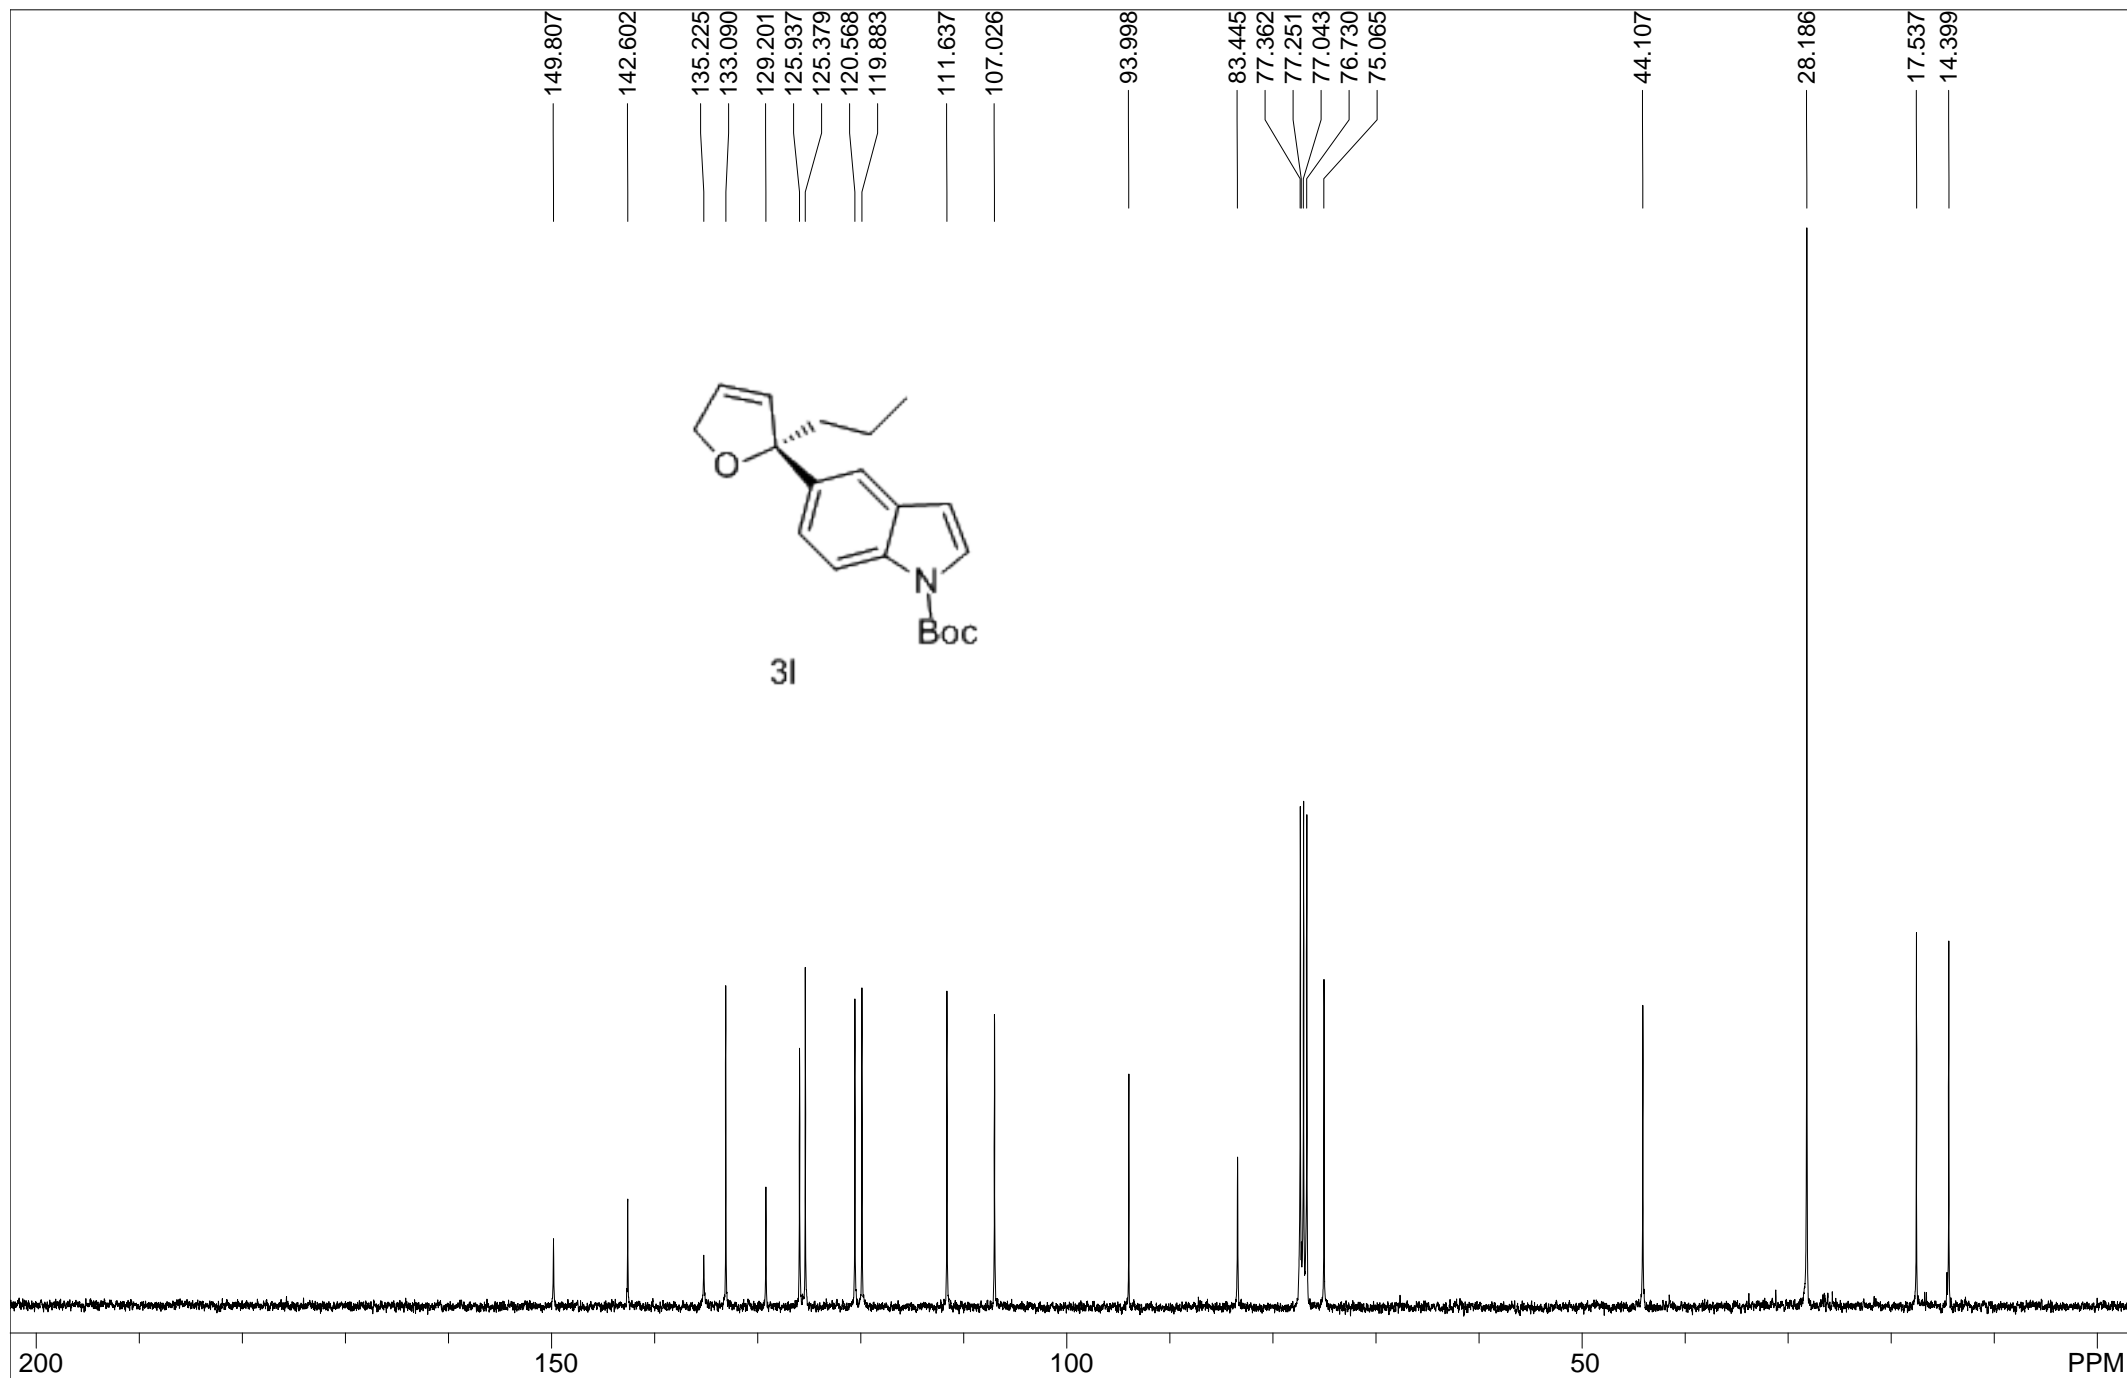

Std carbon:blank line

USER: -- DATE: Dec 31 2014

|             |             |             |              |                      |
|-------------|-------------|-------------|--------------|----------------------|
| F1: 100.598 | F2: 400.031 | SW1: 24510  | OF1: 10561.6 | PTS1d: 31875 , 32768 |
| EX: s2pul   | PW: 4.1 us  | PD: 1.0 sec | NA: 600      | LB: 2.0              |

Nuts - \$5-54-01-CNMR-3.fid



=====  
Acq. Operator :  
Sample Operator :  
Acq. Instrument : SFC Location : Vial 22  
Injection Date : 1/4/2015 2:13:51 PM Inj Volume : 5.000 µl  
Acq. Method : C:\CHEM32\1\METHODS\AGILENT\_SFC6.M  
Last changed : 1/4/2015 2:11:47 PM by  
(modified after loading,  
Analysis Method : C:\CHEM32\1\METHODS\AGILENT\_SFC6.M  
Last changed : 1/5/2015 3:02:46 PM by  
(modified after loading,  
Additional Info : Peak(s) manually integrated

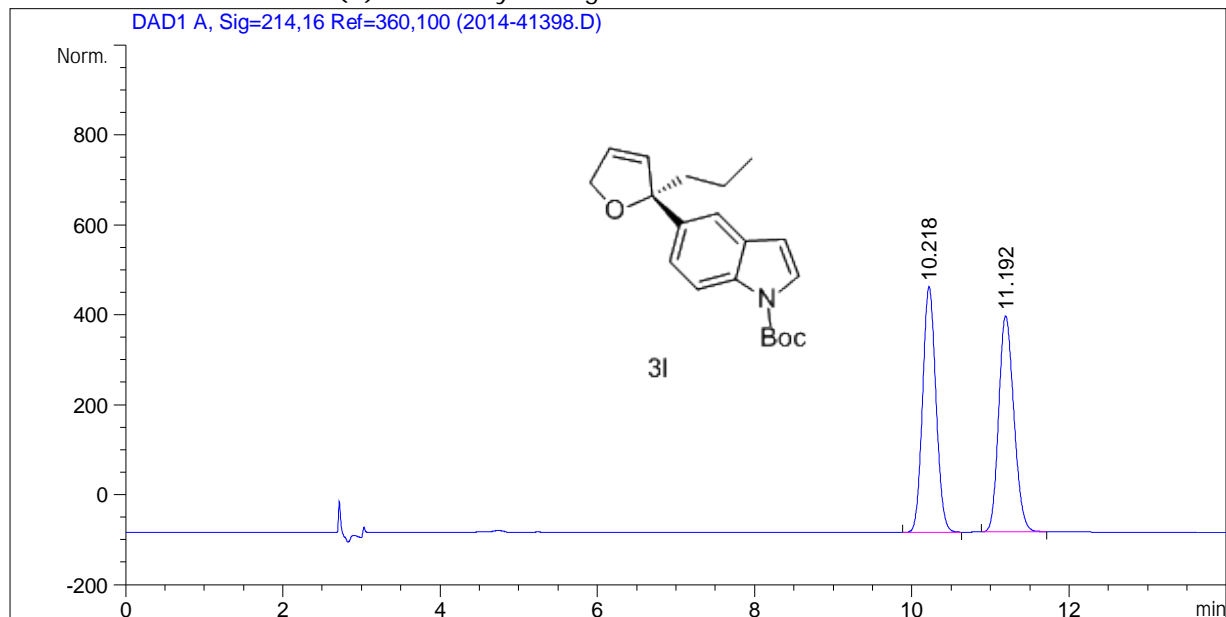

=====  
Area Percent Report  
=====

Sorted By : Signal  
Multiplier : 1.0000  
Dilution : 1.0000  
Do not use Multiplier & Dilution Factor with ISTDs

Signal 1: DAD1 A, Sig=214,16 Ref=360,100

| Peak # | RetTime [min] | Type | Width [min] | Area [mAU*s] | Height [mAU] | Area %  |
|--------|---------------|------|-------------|--------------|--------------|---------|
| 1      | 10.218        | BB   | 0.1851      | 4385.17725   | 370.44376    | 50.0874 |
| 2      | 11.192        | BB   | 0.2067      | 4369.86865   | 325.38489    | 49.9126 |

Totals : 8755.04590 695.82864

=====  
\*\*\* End of Report \*\*\*

Sample Name: 5-62-01

```

=====
Acq. Operator   :
Sample Operator :
Acq. Instrument : SFC                               Location : Vial 23
Injection Date  : 1/4/2015 2:47:21 PM
                                           Inj Volume : 5.000 µl
Acq. Method     : C:\CHEM32\1\METHODS\AGILENT_SFC6.M
Last changed    : 1/4/2015 2:44:52 PM by
                  (modified after loading)
Analysis Method : C:\CHEM32\1\METHODS\AGILENT_SFC6.M
Last changed    : 1/5/2015 3:05:27 PM by
                  (modified after loading)
Additional Info : Peak(s) manually integrated
  
```

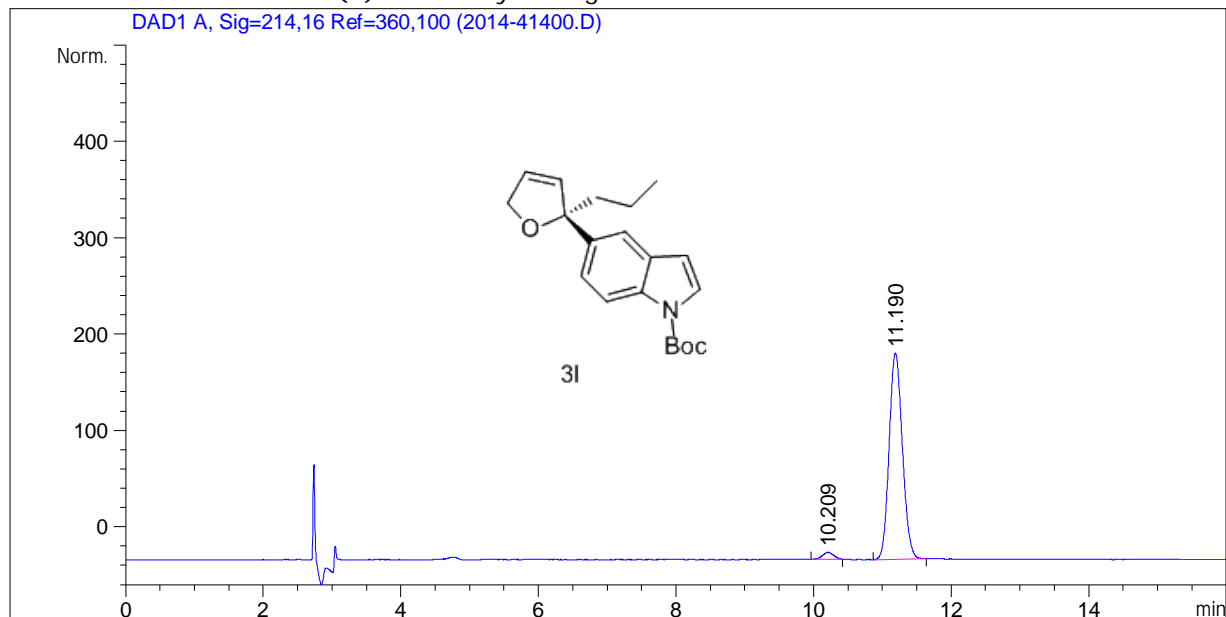

```

=====
                          Area Percent Report
=====
  
```

```

Sorted By      :      Signal
Multiplier     :      1.0000
Dilution       :      1.0000
Do not use Multiplier & Dilution Factor with ISTDs
  
```

Signal 1: DAD1 A, Sig=214,16 Ref=360,100

| Peak # | RetTime [min] | Type | Width [min] | Area [mAU*s] | Height [mAU] | Area %  |
|--------|---------------|------|-------------|--------------|--------------|---------|
| 1      | 10.209        | BB   | 0.1546      | 52.28853     | 4.53341      | 2.7988  |
| 2      | 11.190        | BB   | 0.2049      | 1815.94043   | 135.91817    | 97.2012 |

```
Totals :                1868.22896  140.45157
```

```

=====
*** End of Report ***
  
```

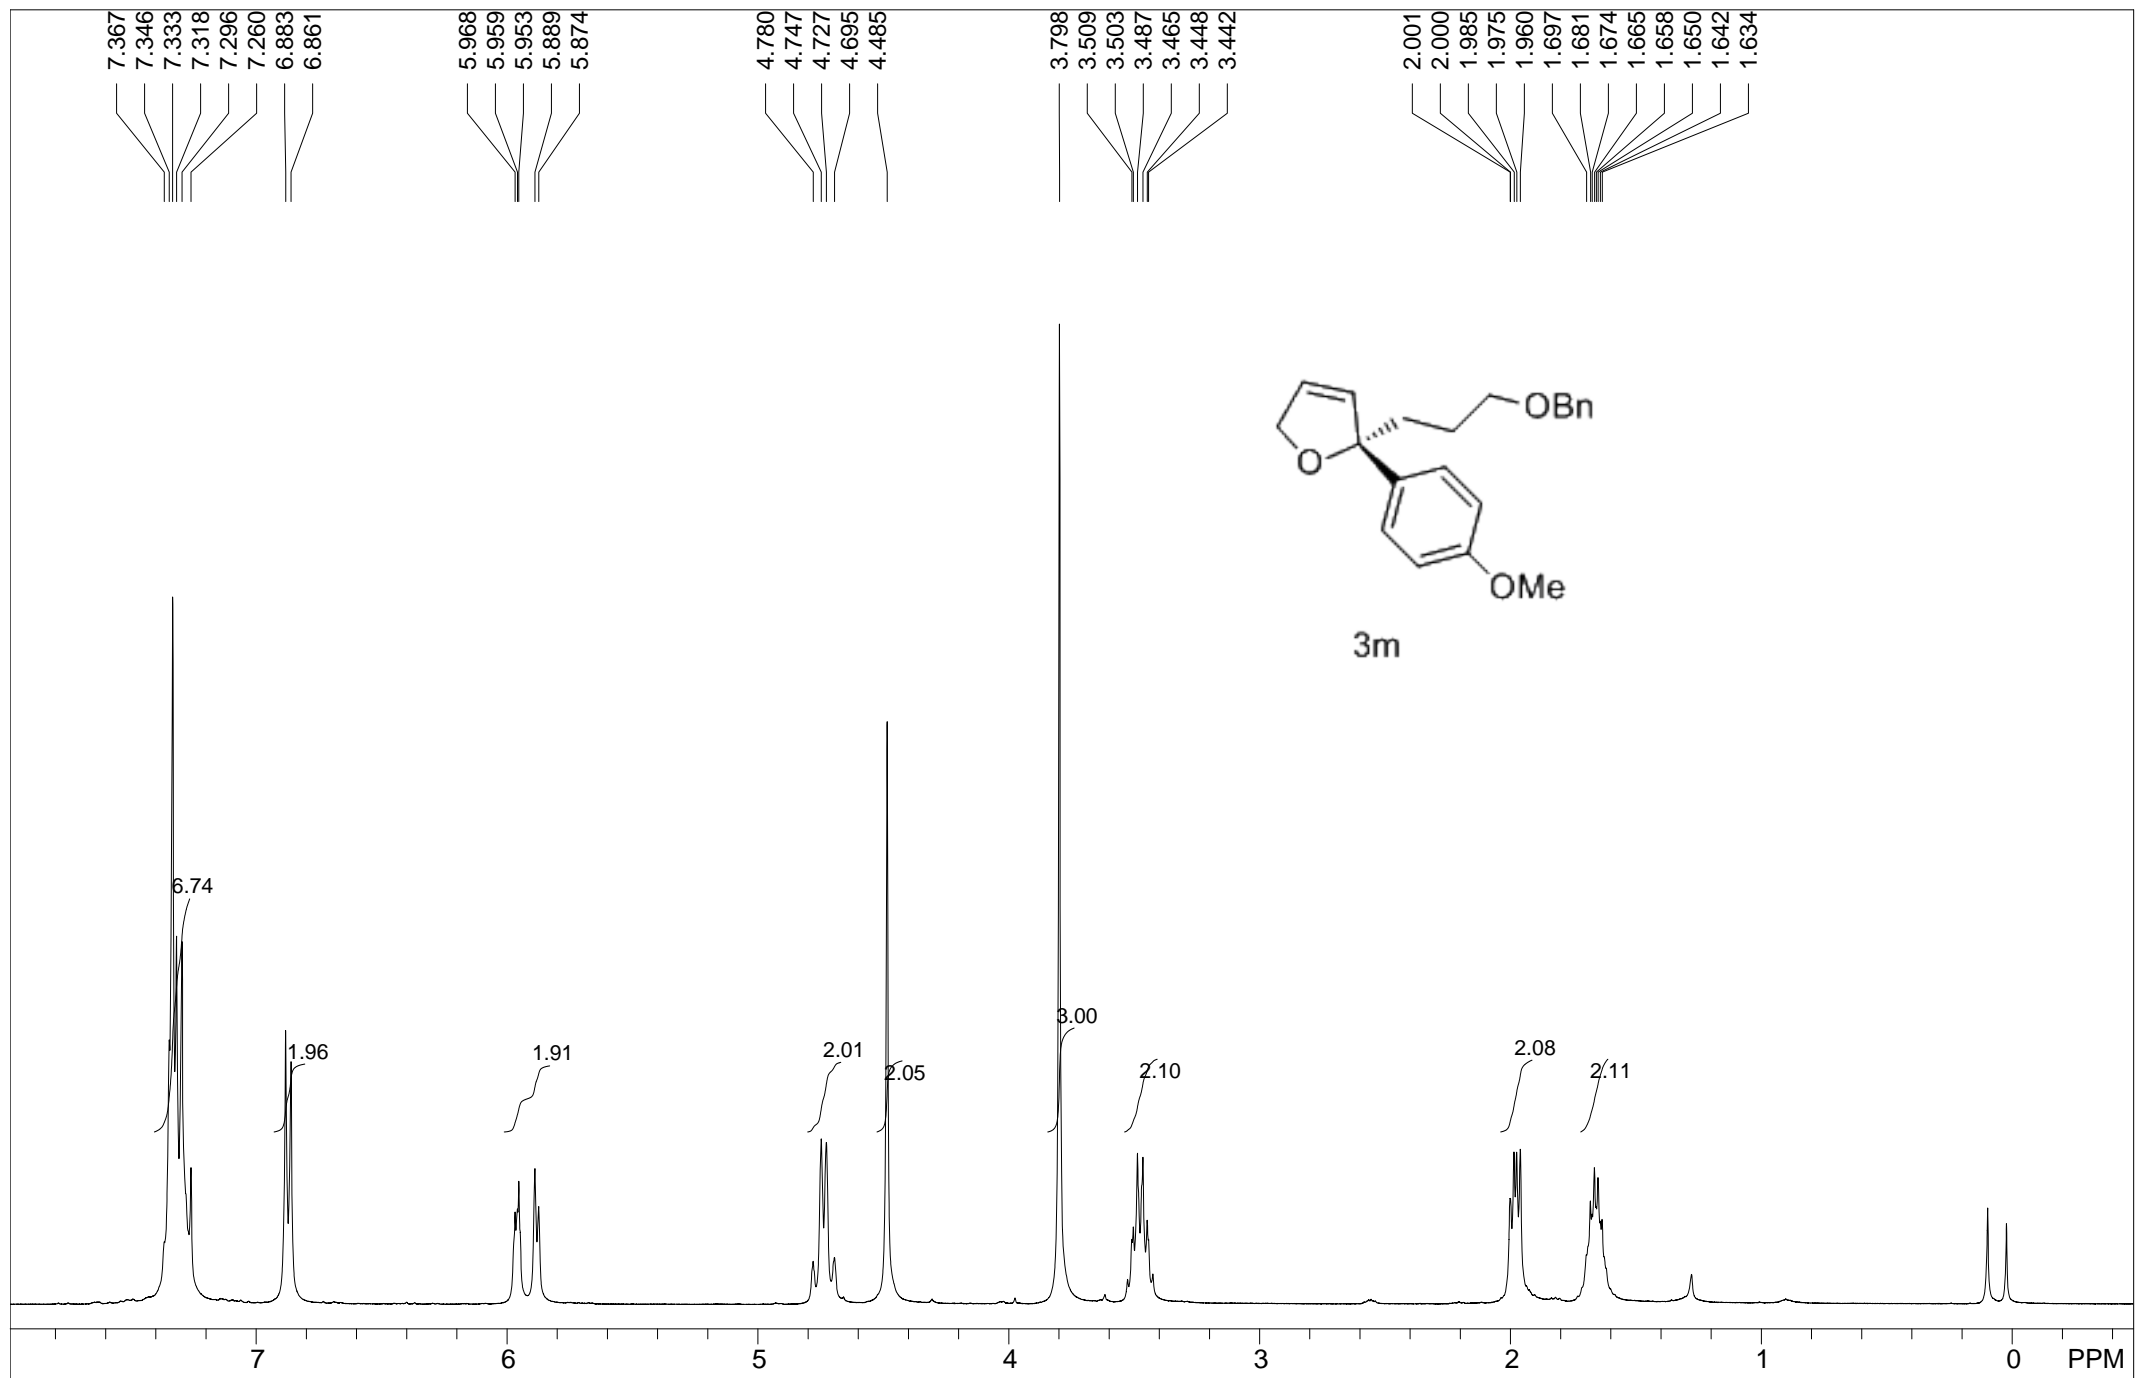

Std proton:blank line

USER: -- DATE: Dec 2 2014

|             |             |             |             |                      |
|-------------|-------------|-------------|-------------|----------------------|
| F1: 400.031 | F2: 100.597 | SW1: 6510   | OF1: 2407.4 | PTS1d: 19531 , 32768 |
| EX: s2pul   | PW: 10.6 us | PD: 1.0 sec | NA: 8       | LB: 0.0              |

Nuts - \$4-66-01-HNMR.fid

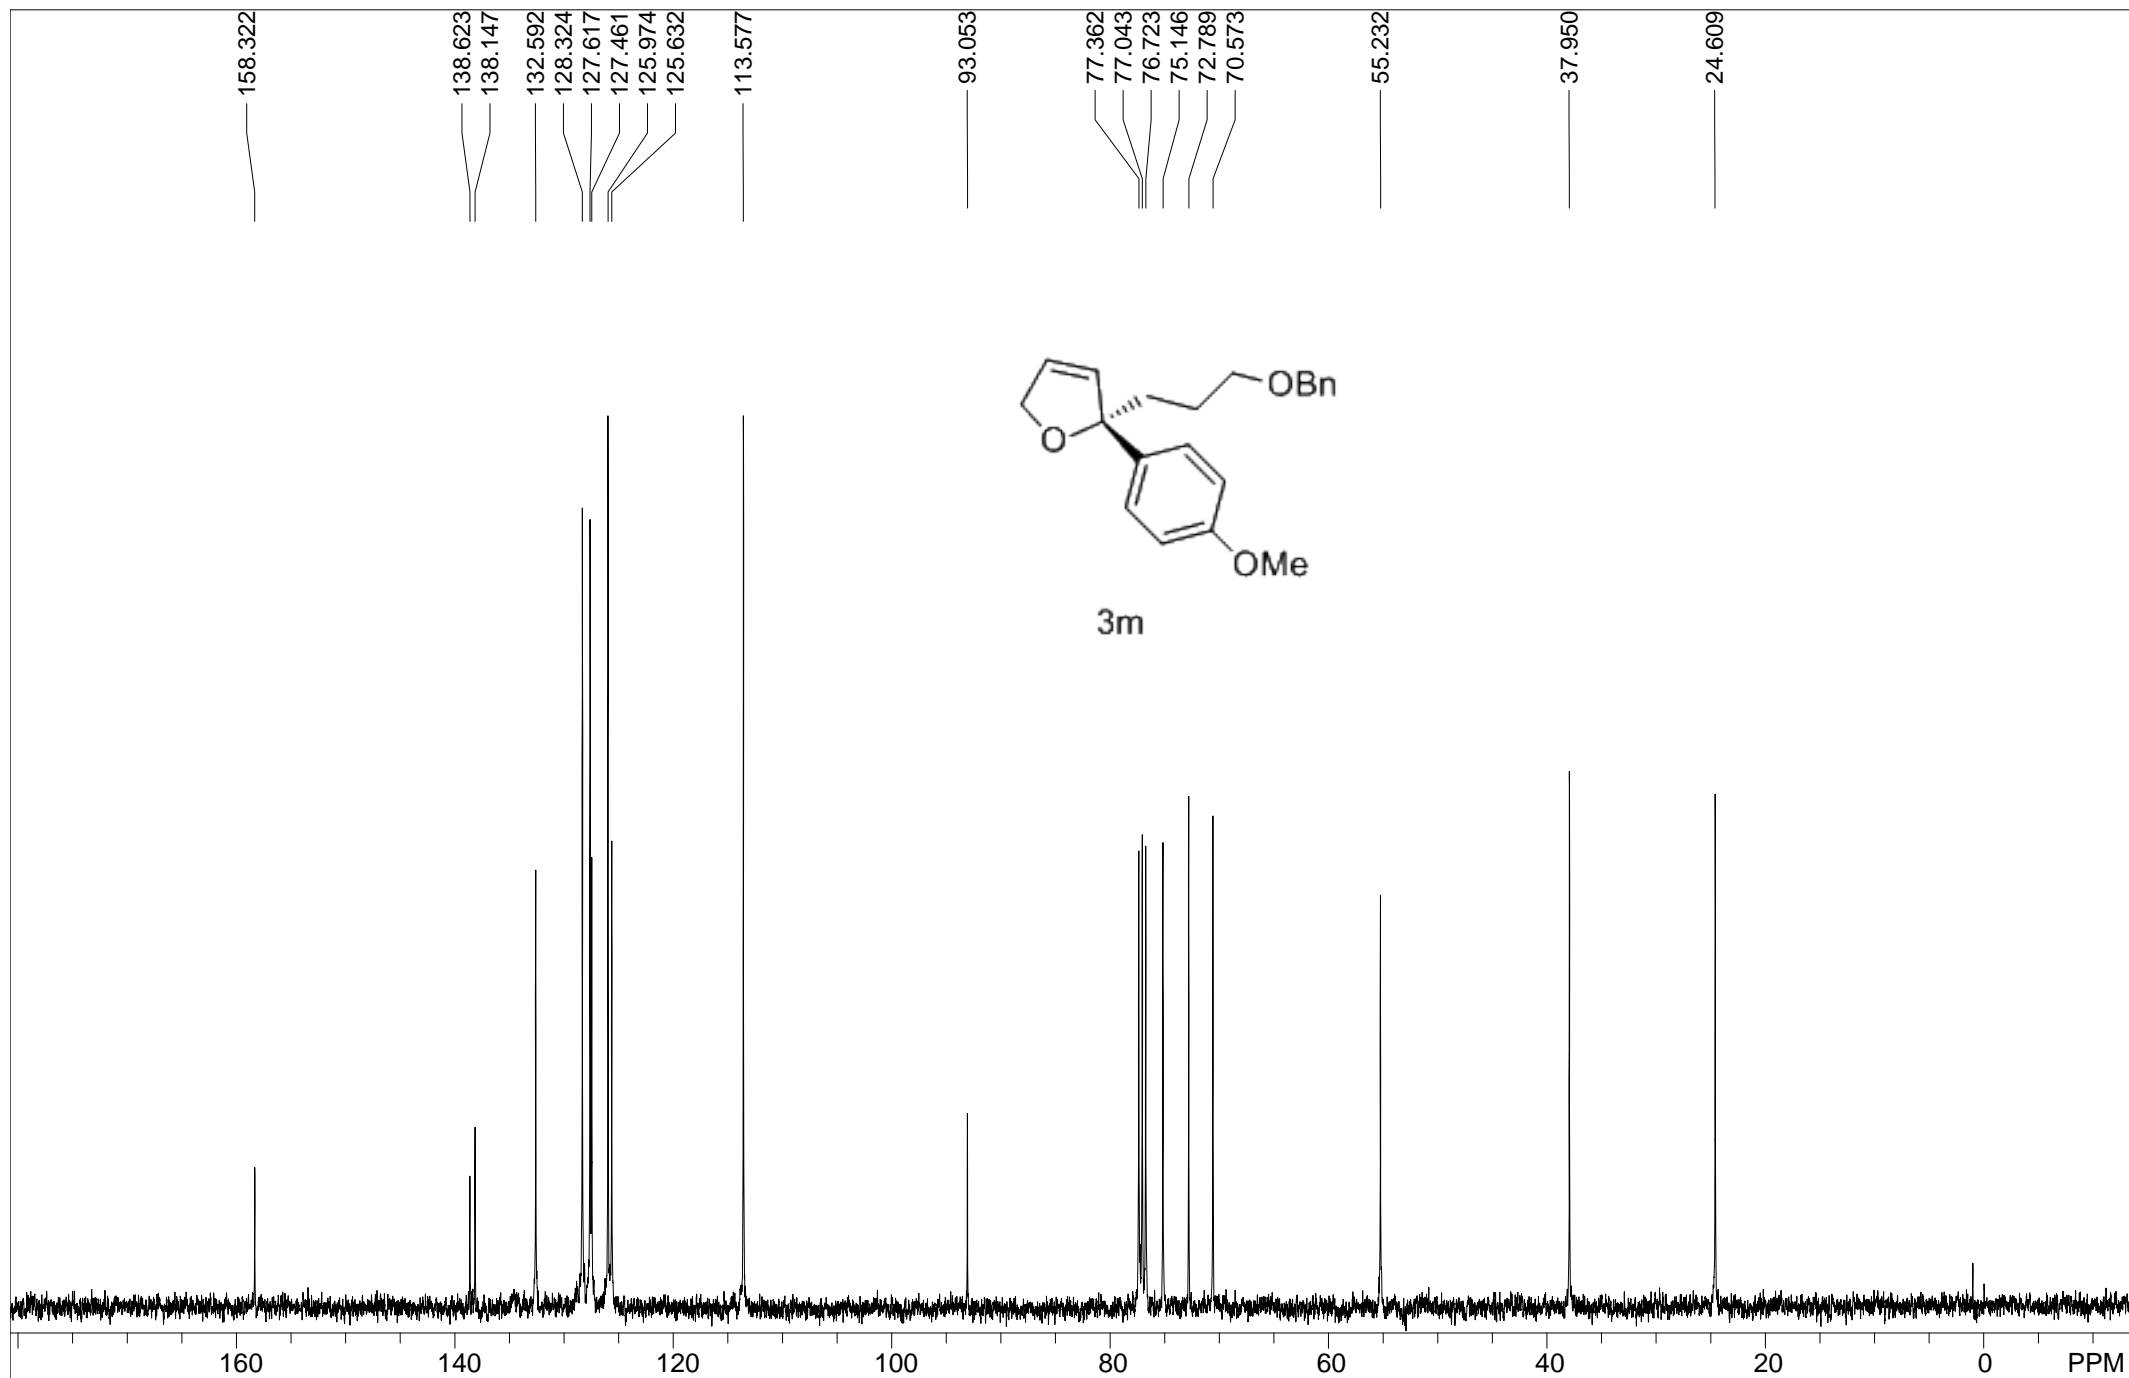

Std carbon:blank line

USER: -- DATE: Dec 2 2014

|             |             |            |             |              |         |                             |
|-------------|-------------|------------|-------------|--------------|---------|-----------------------------|
| F1: 100.598 | F2: 400.031 | SW1: 24510 |             | OF1: 10561.6 |         | PTS1d: 31875 , 32768        |
| EX: s2pul   |             | PW: 4.1 us | PD: 1.0 sec | NA: 188      | LB: 2.0 | Nuts - \$4-66-01-CNMR-3.fid |

# ==== Shimadzu LCsolution Analysis Report ====

D:\LabSolutions\Data\Project1\ZQS\4-66-01.lcd

Acquired by : Admin  
 Sample Name : 4-66-01  
 Sample ID : OD-H,98.0/2.0,1.0,214  
 Vial # : 0  
 Injection Volume : 10 uL  
 Data File Name : 4-66-01.lcd  
 Method File Name : 1234.lcm  
 Batch File Name :  
 Report File Name : Default.lcr  
 Data Acquired : 2013-11-17 10:26:15  
 Data Processed : 2013-11-17 11:37:45

## <Chromatogram>

D:\LabSolutions\Data\Project1\ZQS\4-66-01.lcd

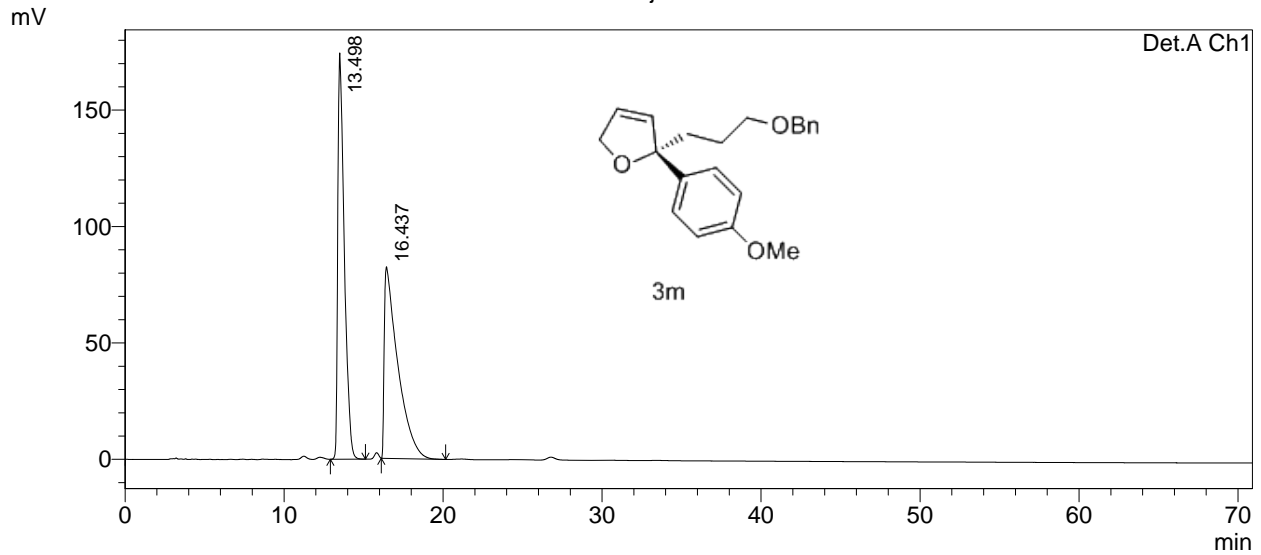

1 Det.A Ch1/214nm

PeakTable

Detector A Ch1 214nm

| Peak# | Ret. Time | Area    | Height | Area %  |
|-------|-----------|---------|--------|---------|
| 1     | 13.498    | 4961267 | 174542 | 50.403  |
| 2     | 16.437    | 4881834 | 82321  | 49.597  |
| Total |           | 9843101 | 256863 | 100.000 |

# ==== Shimadzu LCsolution Analysis Report ====

D:\LabSolutions\Data\Project1\ZQS\4-73-01.lcd

Acquired by : Admin  
 Sample Name : 4-73-01  
 Sample ID : OD-H,98.0/2.0,1.0,214  
 Vial # : 0  
 Injection Volume : 10 uL  
 Data File Name : 4-73-01.lcd  
 Method File Name : 1234.lcm  
 Batch File Name :  
 Report File Name : Default.lcr  
 Data Acquired : 2013-11-17 11:39:20  
 Data Processed : 2013-11-17 12:07:08

## <Chromatogram>

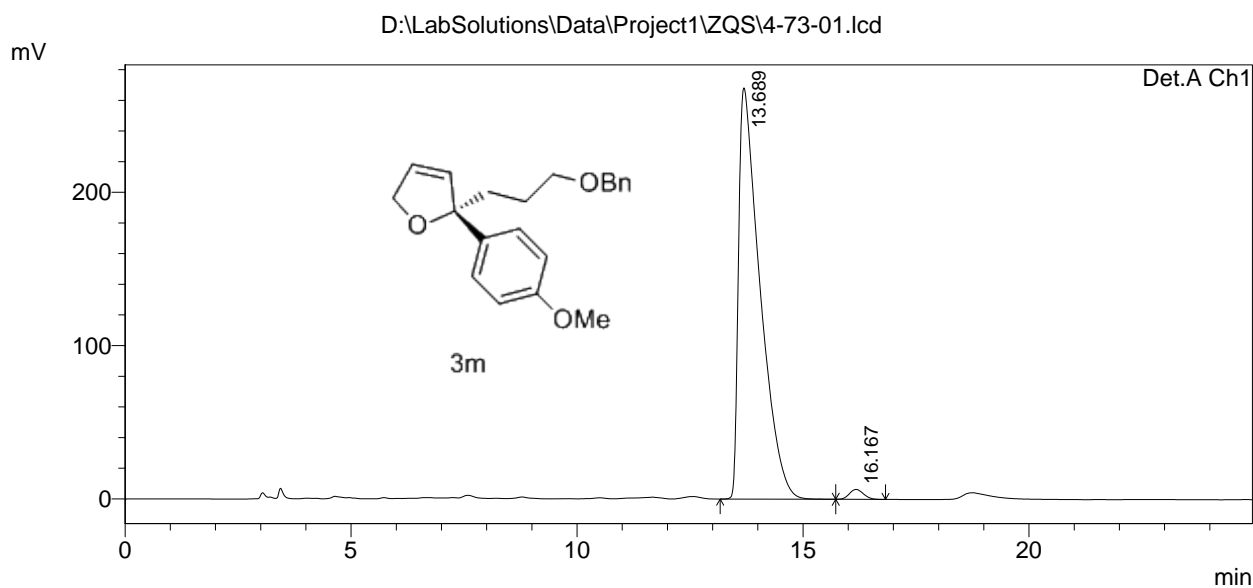

PeakTable

Detector A Ch1 214nm

| Peak# | Ret. Time | Area    | Height | Area %  |
|-------|-----------|---------|--------|---------|
| 1     | 13.689    | 8856763 | 268363 | 98.433  |
| 2     | 16.167    | 140965  | 6508   | 1.567   |
| Total |           | 8997728 | 274870 | 100.000 |

8.235  
 7.594  
 7.588  
 7.535  
 7.515  
 7.367  
 7.347  
 7.343  
 7.335  
 7.312  
 7.309  
 7.300  
 7.291  
 7.289  
 7.261  
 6.550  
 6.541  
 6.085  
 6.077  
 6.070  
 5.917  
 5.902  
 4.834  
 4.830  
 4.801  
 4.797  
 4.793  
 4.759  
 4.489  
 3.526  
 3.520  
 3.503  
 3.486  
 3.469  
 3.463  
 2.103  
 2.084  
 2.067  
 1.771  
 1.752  
 1.735  
 1.731  
 1.713  
 1.695  
 1.658

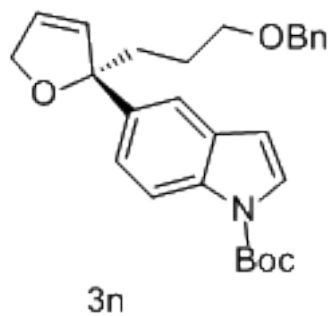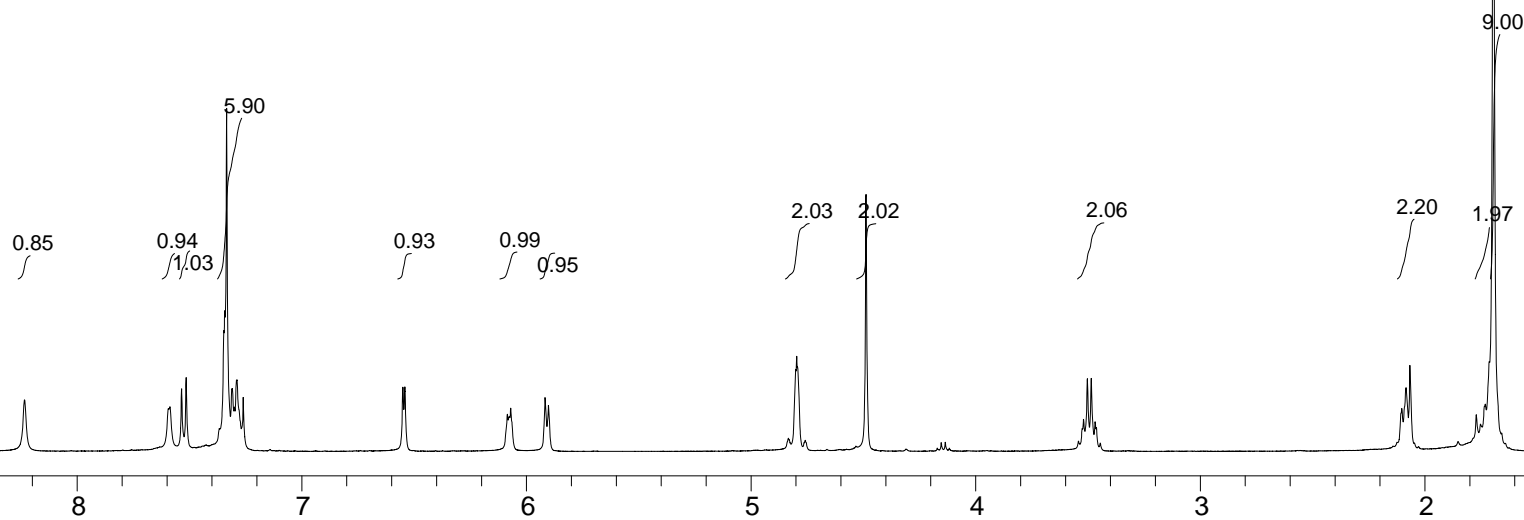

Std proton:blank line

USER: -- DATE: Dec 30 2014

|             |             |             |             |                      |
|-------------|-------------|-------------|-------------|----------------------|
| F1: 400.032 | F2: 100.597 | SW1: 7310   | OF1: 2807.8 | PTS1d: 21930 , 32768 |
| EX: s2pul   | PW: 10.6 us | PD: 1.0 sec | NA: 4       | LB: 0.0              |

Nuts - \$5-53-02-HNMR.fid

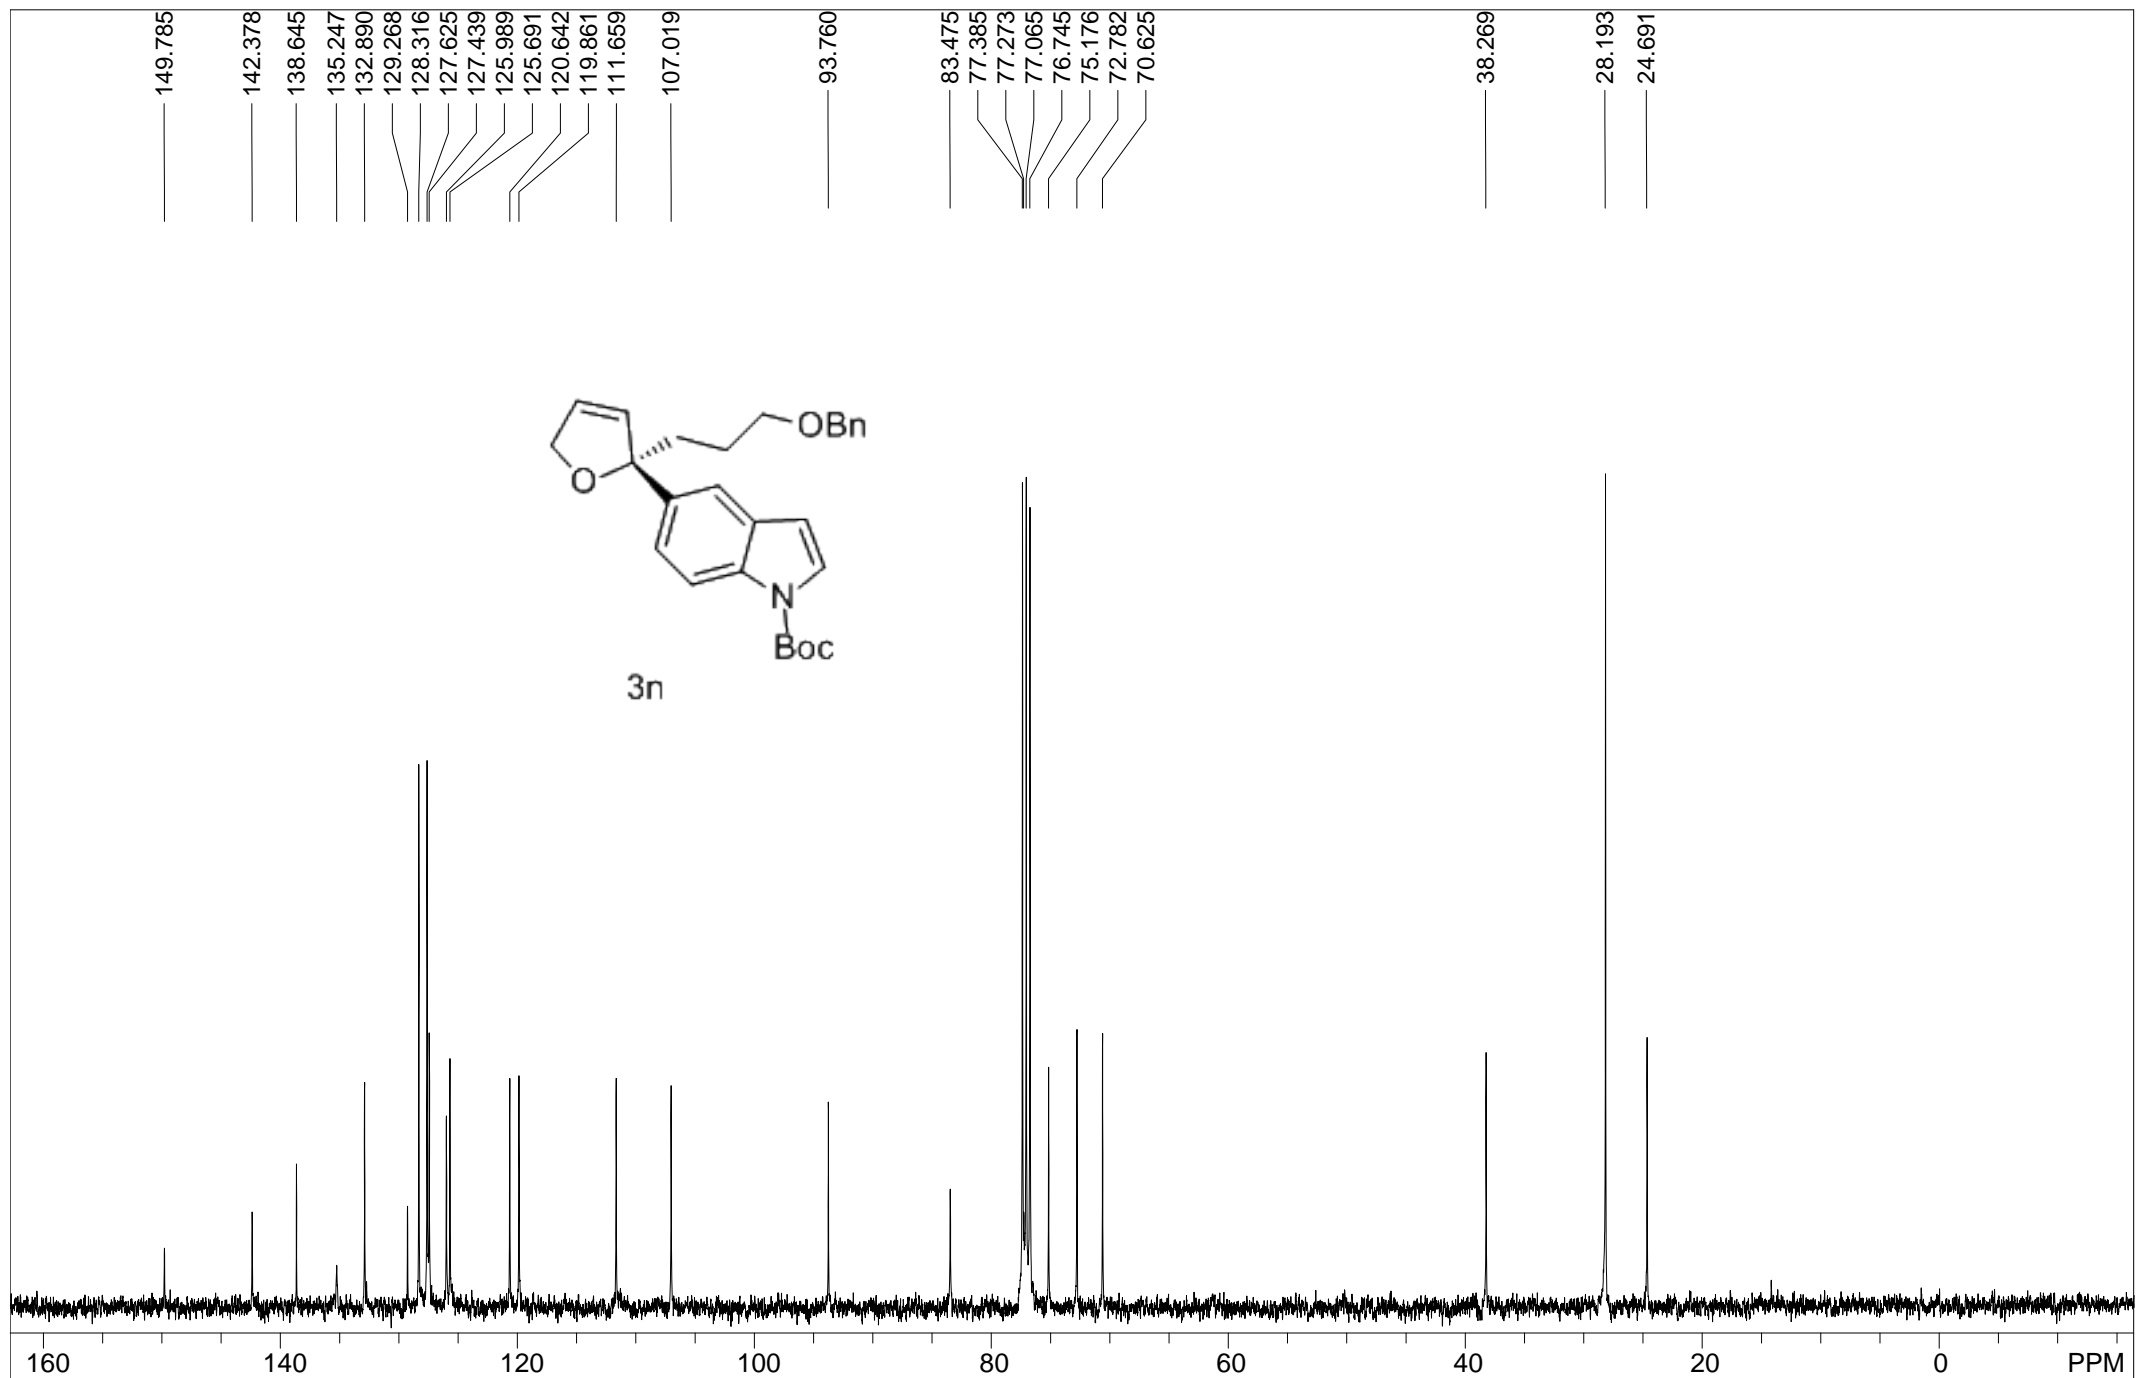

Std carbon:blank line

USER: -- DATE: Dec 30 2014

|             |             |             |  |              |         |                           |
|-------------|-------------|-------------|--|--------------|---------|---------------------------|
| F1: 100.598 | F2: 400.031 | SW1: 24510  |  | OF1: 10561.6 |         | PTS1d: 31875 , 32768      |
| EX: s2pul   | PW: 4.1 us  | PD: 1.0 sec |  | NA: 204      | LB: 2.0 | Nuts - \$5-53-02-CNMR.fid |



=====  
Acq. Operator :  
Sample Operator :  
Acq. Instrument : SFC Location : Vial 21  
Injection Date : 1/5/2015 9:01:42 AM Inj Volume : 5.000 µl  
Acq. Method : C:\CHEM32\1\METHODS\AGILENT\_SFC6.M  
Last changed : 1/5/2015 8:57:33 AM by  
(modified after loading)  
Analysis Method : C:\CHEM32\1\METHODS\AGILENT\_SFC6.M  
Last changed : 1/5/2015 3:00:40 PM by  
(modified after loading)  
Additional Info : Peak(s) manually integrated

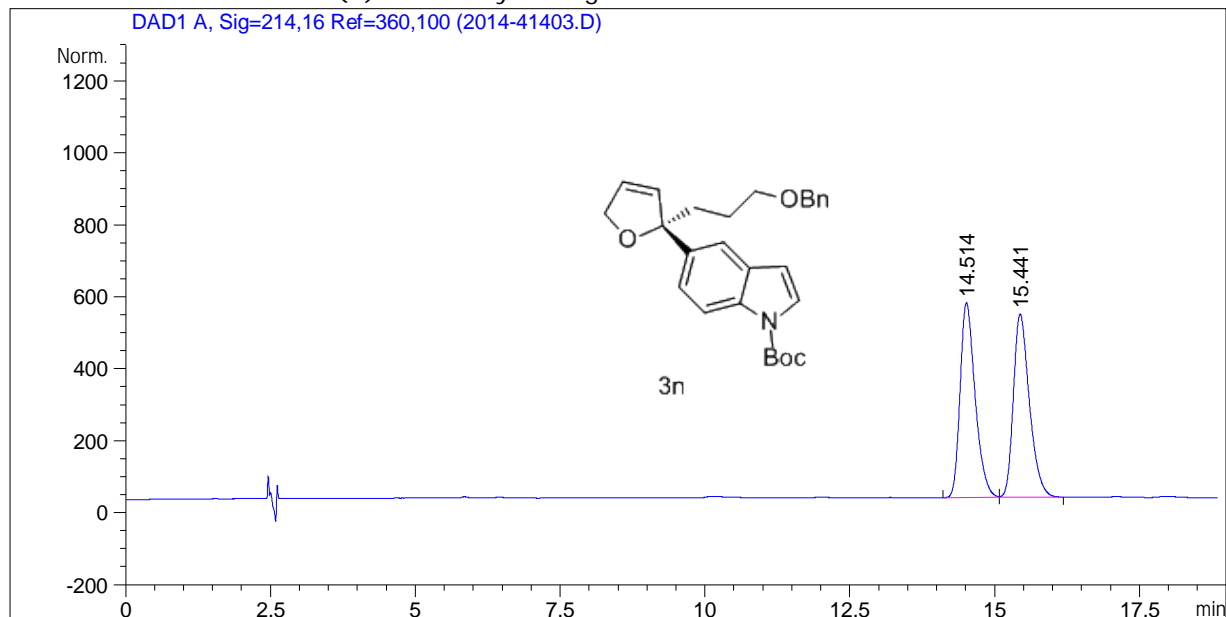

=====  
Area Percent Report  
=====

Sorted By : Signal  
Multiplier : 1.0000  
Dilution : 1.0000  
Do not use Multiplier & Dilution Factor with ISTDs

Signal 1: DAD1 A, Sig=214,16 Ref=360,100

| Peak # | RetTime [min] | Type | Width [min] | Area [mAU*s] | Height [mAU] | Area %  |
|--------|---------------|------|-------------|--------------|--------------|---------|
| 1      | 14.514        | BV   | 0.2749      | 5927.44238   | 327.93542    | 49.9760 |
| 2      | 15.441        | VB   | 0.2894      | 5933.13770   | 308.42700    | 50.0240 |

Totals : 1.18606e4 636.36243

=====  
\*\*\* End of Report \*\*\*

Sample Name: 5-61-02

```

=====
Acq. Operator   :
Sample Operator :
Acq. Instrument : SFC                               Location : Vial 24
Injection Date  : 1/5/2015 9:45:56 AM
                                           Inj Volume : 5.000 µl

Acq. Method     : C:\CHEM32\1\METHODS\AGILENT_SFC6.M
Last changed    : 1/5/2015 8:57:33 AM by
                  (modified after loading)

Analysis Method : C:\CHEM32\1\METHODS\AGILENT_SFC6.M
Last changed    : 1/5/2015 2:58:48 PM by
                  (modified after loading)

Additional Info : Peak(s) manually integrated
  
```

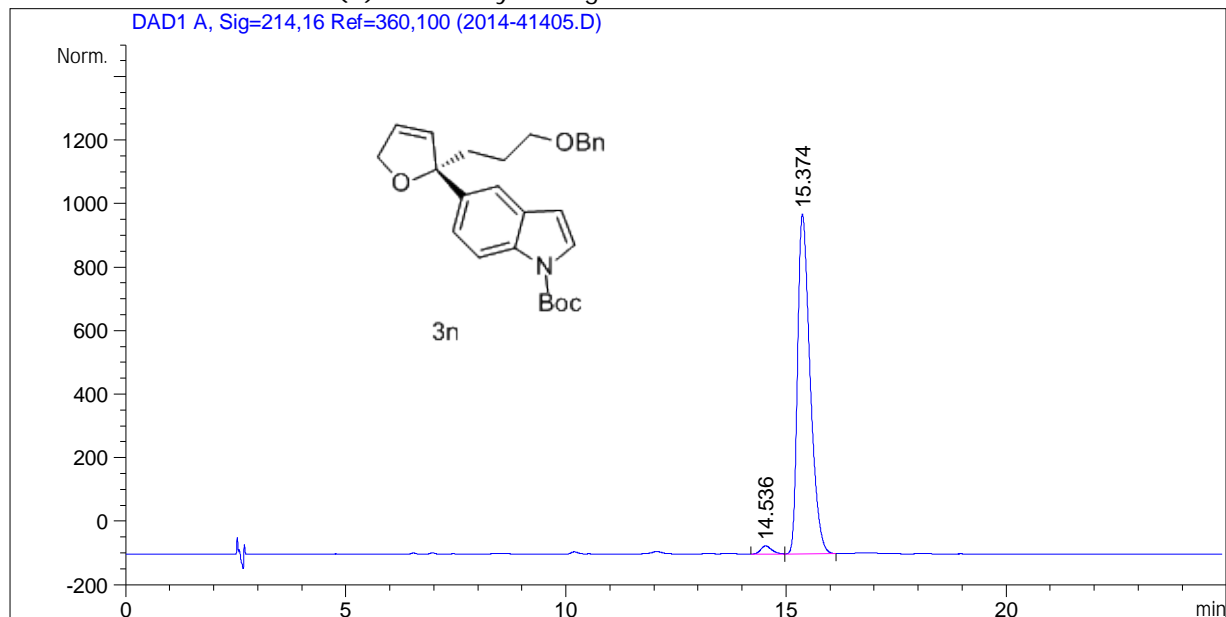

```

=====
                          Area Percent Report
=====
  
```

```

Sorted By      :      Signal
Multiplier     :      1.0000
Dilution      :      1.0000
Do not use Multiplier & Dilution Factor with ISTDs
  
```

Signal 1: DAD1 A, Sig=214,16 Ref=360,100

| Peak # | RetTime [min] | Type | Width [min] | Area [mAU*s] | Height [mAU] | Area %  |
|--------|---------------|------|-------------|--------------|--------------|---------|
| 1      | 14.536        | BB   | 0.2571      | 346.54358    | 20.20112     | 2.0181  |
| 2      | 15.374        | BB   | 0.2995      | 1.68252e4    | 851.69269    | 97.9819 |

```
Totals :                1.71718e4  871.89381
```

```

=====
*** End of Report ***
  
```

7.389 7.369 7.342 7.337 7.321 7.305 7.291 7.271 7.260 7.240 7.222 7.204 5.991 5.986 5.977 5.971 5.965 5.891 5.876

4.789 4.757 4.731 4.699 4.470

3.497 3.491 3.474 3.468 3.458 3.450 3.433 3.428 3.411

2.007 2.000 1.992 1.983 1.975 1.966 1.960 1.699 1.682 1.678 1.661 1.644 1.639 1.628 1.621 1.604

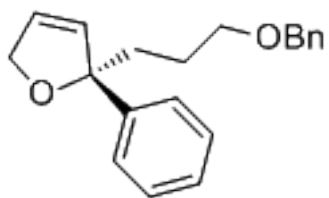

30

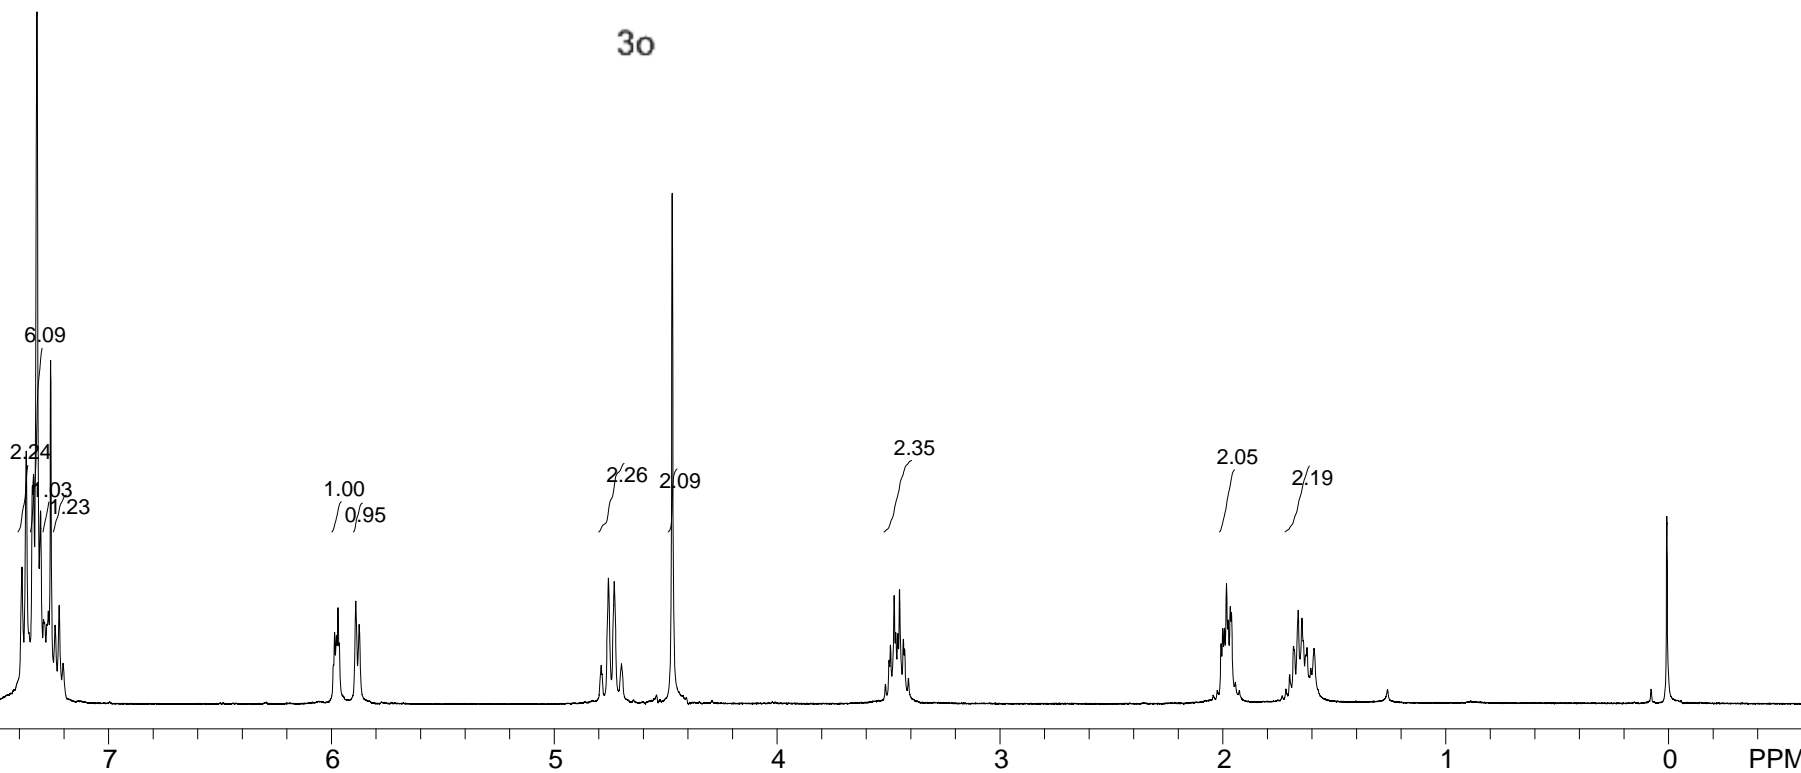

Std proton:blank line

USER: -- DATE: Jan 29 2015

|             |             |             |             |                      |
|-------------|-------------|-------------|-------------|----------------------|
| F1: 400.032 | F2: 100.597 | SW1: 7310   | OF1: 2807.3 | PTS1d: 21930 , 32768 |
| EX: s2pul   | PW: 10.6 us | PD: 1.0 sec | NA: 8       | LB: 0.0              |

Nuts - \$5-98-01-HNMR.fid

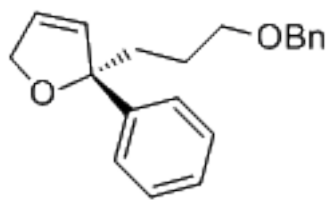

3o

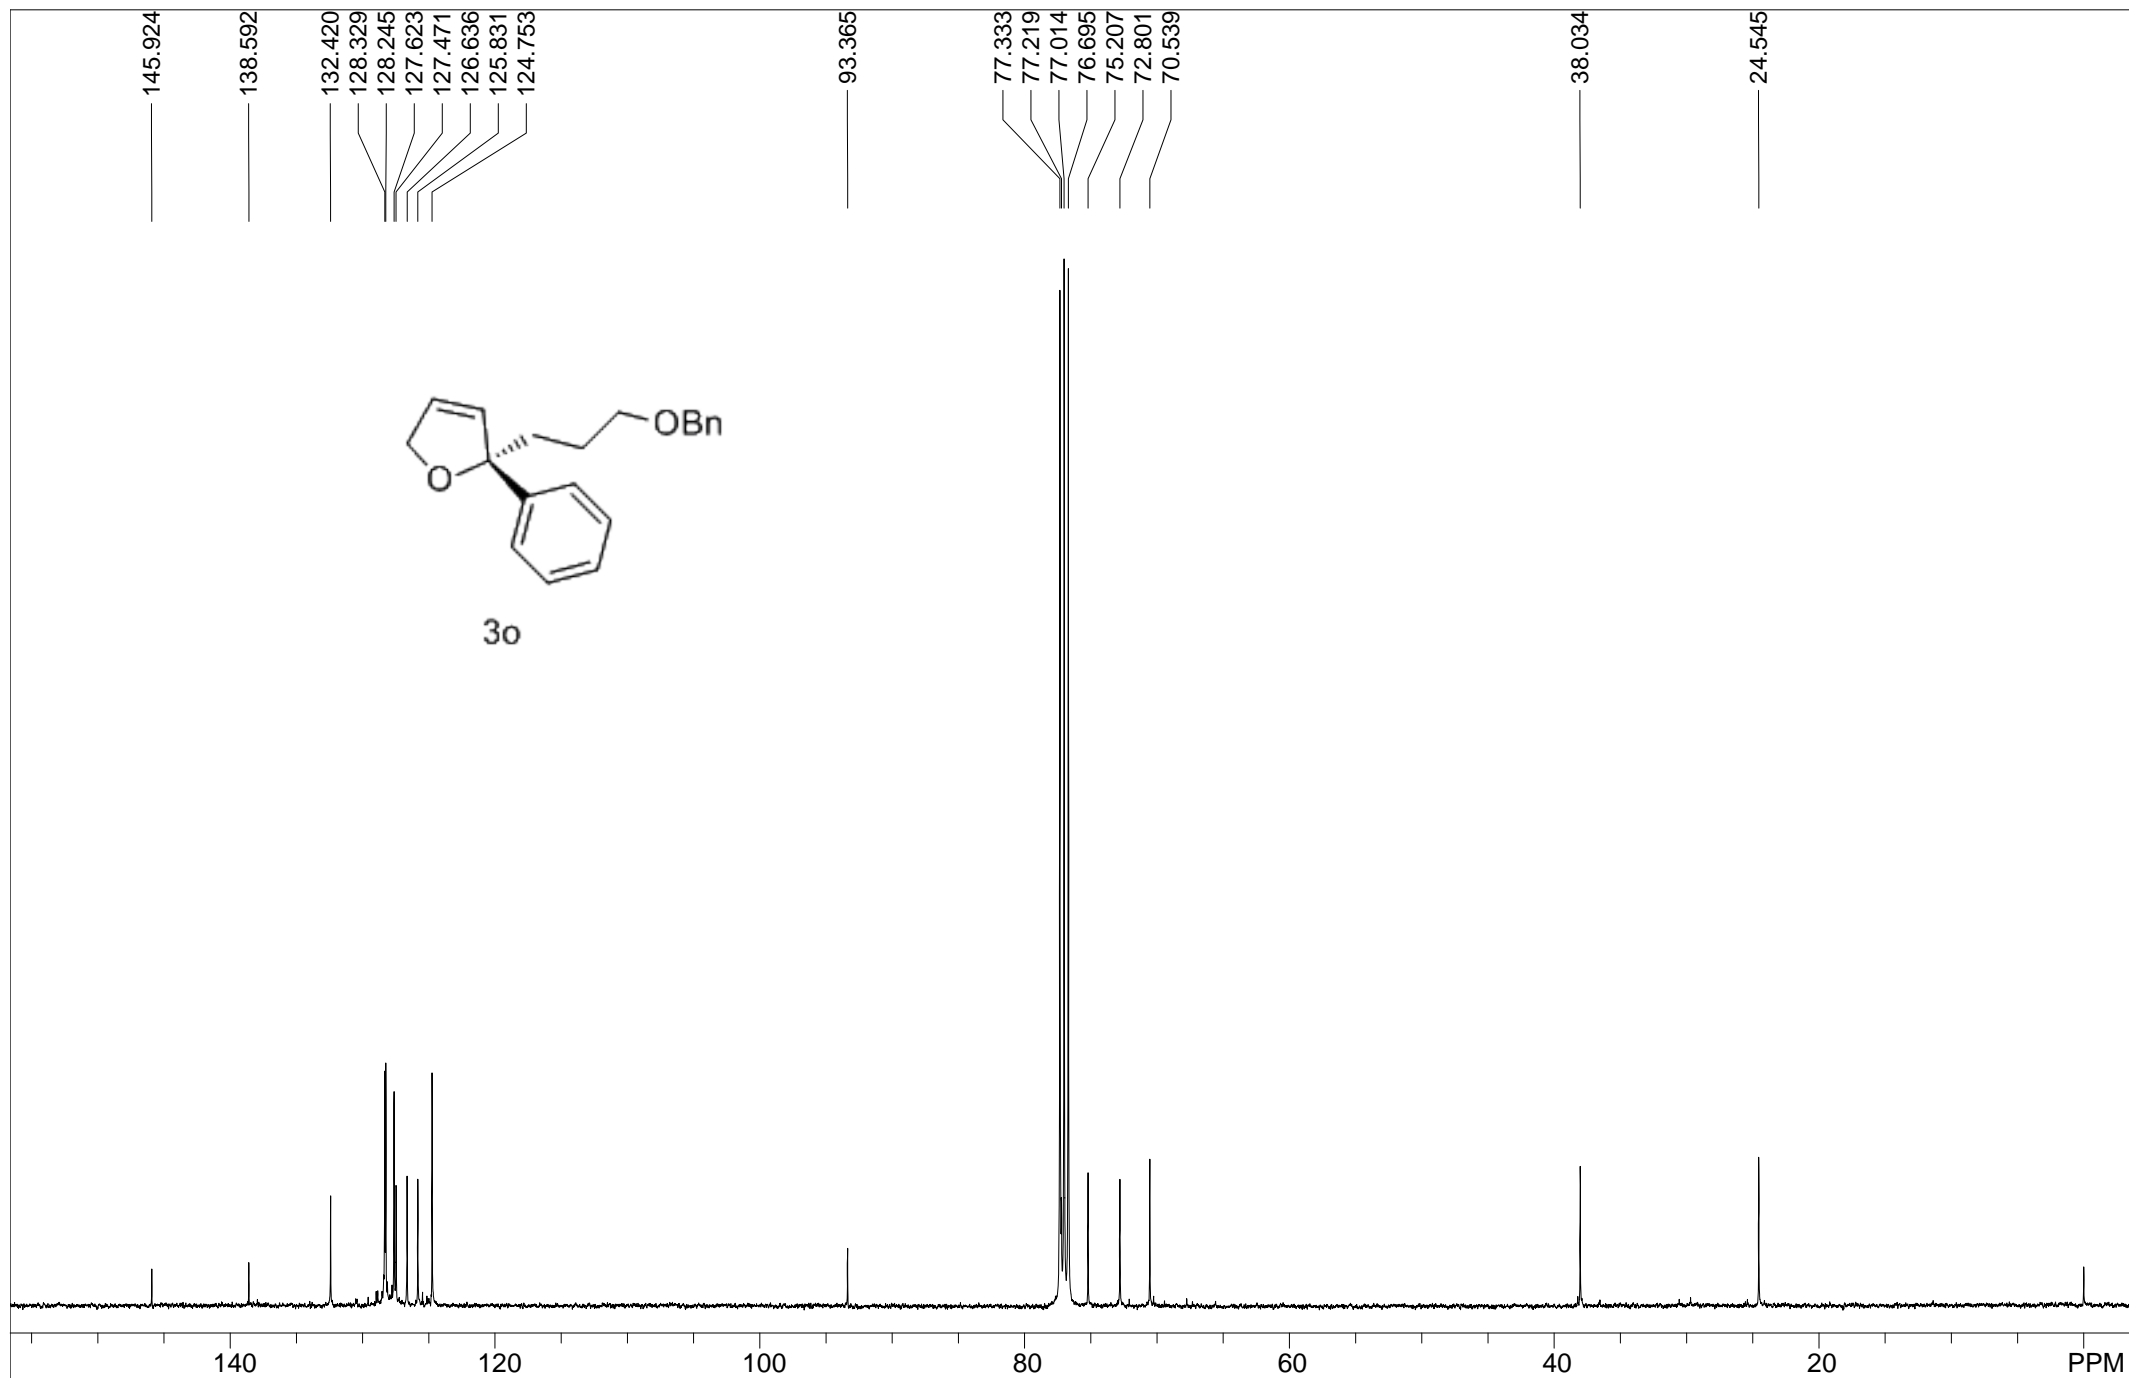

new experiment

USER: -- DATE: Dec 29 2014

|             |             |             |  |              |         |                                   |
|-------------|-------------|-------------|--|--------------|---------|-----------------------------------|
| F1: 100.521 | F2: 399.722 | SW1: 25000  |  | OF1: 11056.1 |         | PTS1d: 32768 , 32768              |
| EX: s2pul   | PW: 4.9 us  | PD: 1.0 sec |  | NA: 11860    | LB: 2.0 | Nuts - \$ZQS-4-94-01-cnmr400m.fid |

# ==== Shimadzu LCsolution Analysis Report ====

D:\LabSolutions\Data\Project1\ZQS\5-98-01-3.lcd

Acquired by : Admin  
 Sample Name : 5-98-01  
 Sample ID : OD-H,99/1,1.0,214  
 Vial # : 0  
 Injection Volume : 10 uL  
 Data File Name : 5-98-01-3.lcd  
 Method File Name : 1234.lcm  
 Batch File Name :  
 Report File Name : Default.lcr  
 Data Acquired : 2014-1-26 19:40:31  
 Data Processed : 2014-1-26 20:02:54

## <Chromatogram>

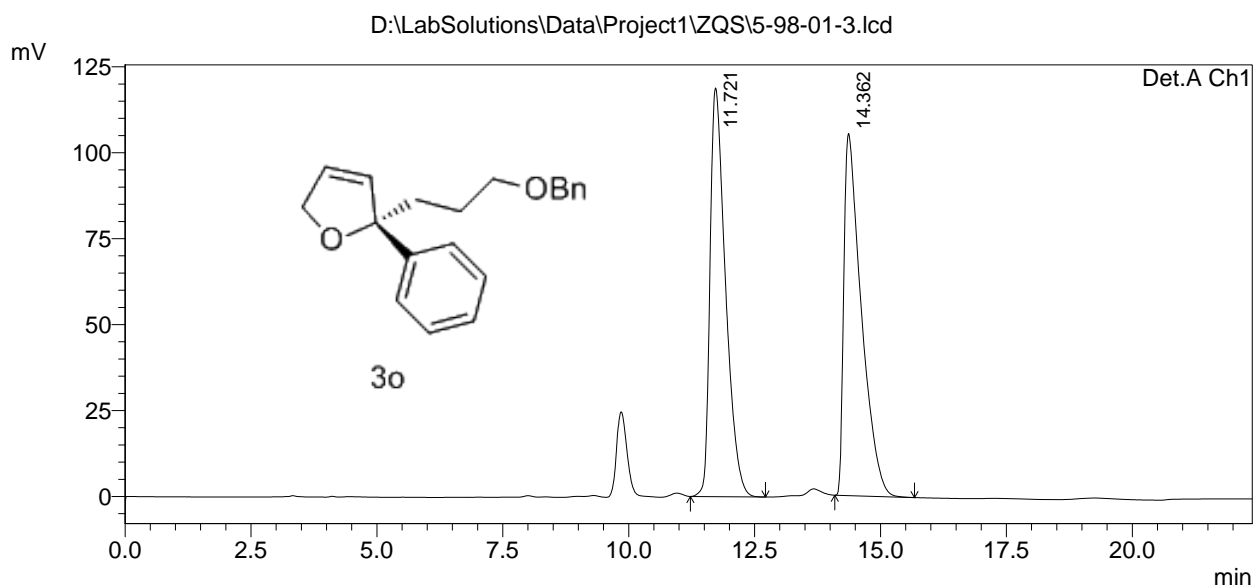

PeakTable

Detector A Ch1 214nm

| Peak# | Ret. Time | Area    | Height | Area %  |
|-------|-----------|---------|--------|---------|
| 1     | 11.721    | 2545478 | 118915 | 49.988  |
| 2     | 14.362    | 2546719 | 105319 | 50.012  |
| Total |           | 5092197 | 224233 | 100.000 |

# ==== Shimadzu LCsolution Analysis Report ====

D:\LabSolutions\Data\Project1\ZQS\4-86-01.lcd

Acquired by : Admin  
 Sample Name : 4-86-01  
 Sample ID : OD-H,99.0/1.0,1.0,214  
 Vial # : 0  
 Injection Volume : 10 uL  
 Data File Name : 4-86-01.lcd  
 Method File Name : 1234.lcm  
 Batch File Name :  
 Report File Name : Default.lcr  
 Data Acquired : 2013-11-27 18:12:29  
 Data Processed : 2013-12-3 19:50:10

## <Chromatogram>

D:\LabSolutions\Data\Project1\ZQS\4-86-01.lcd

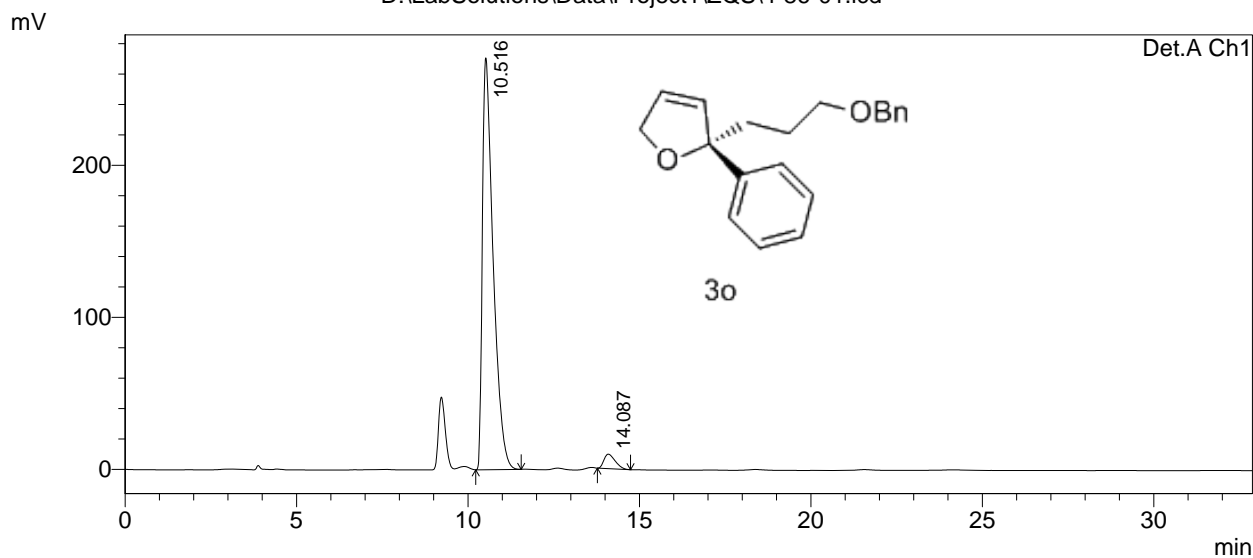

1 Det.A Ch1/214nm

PeakTable

Detector A Ch1 214nm

| Peak# | Ret. Time | Area    | Height | Area %  |
|-------|-----------|---------|--------|---------|
| 1     | 10.516    | 5924028 | 270864 | 96.448  |
| 2     | 14.087    | 218171  | 9550   | 3.552   |
| Total |           | 6142199 | 280414 | 100.000 |

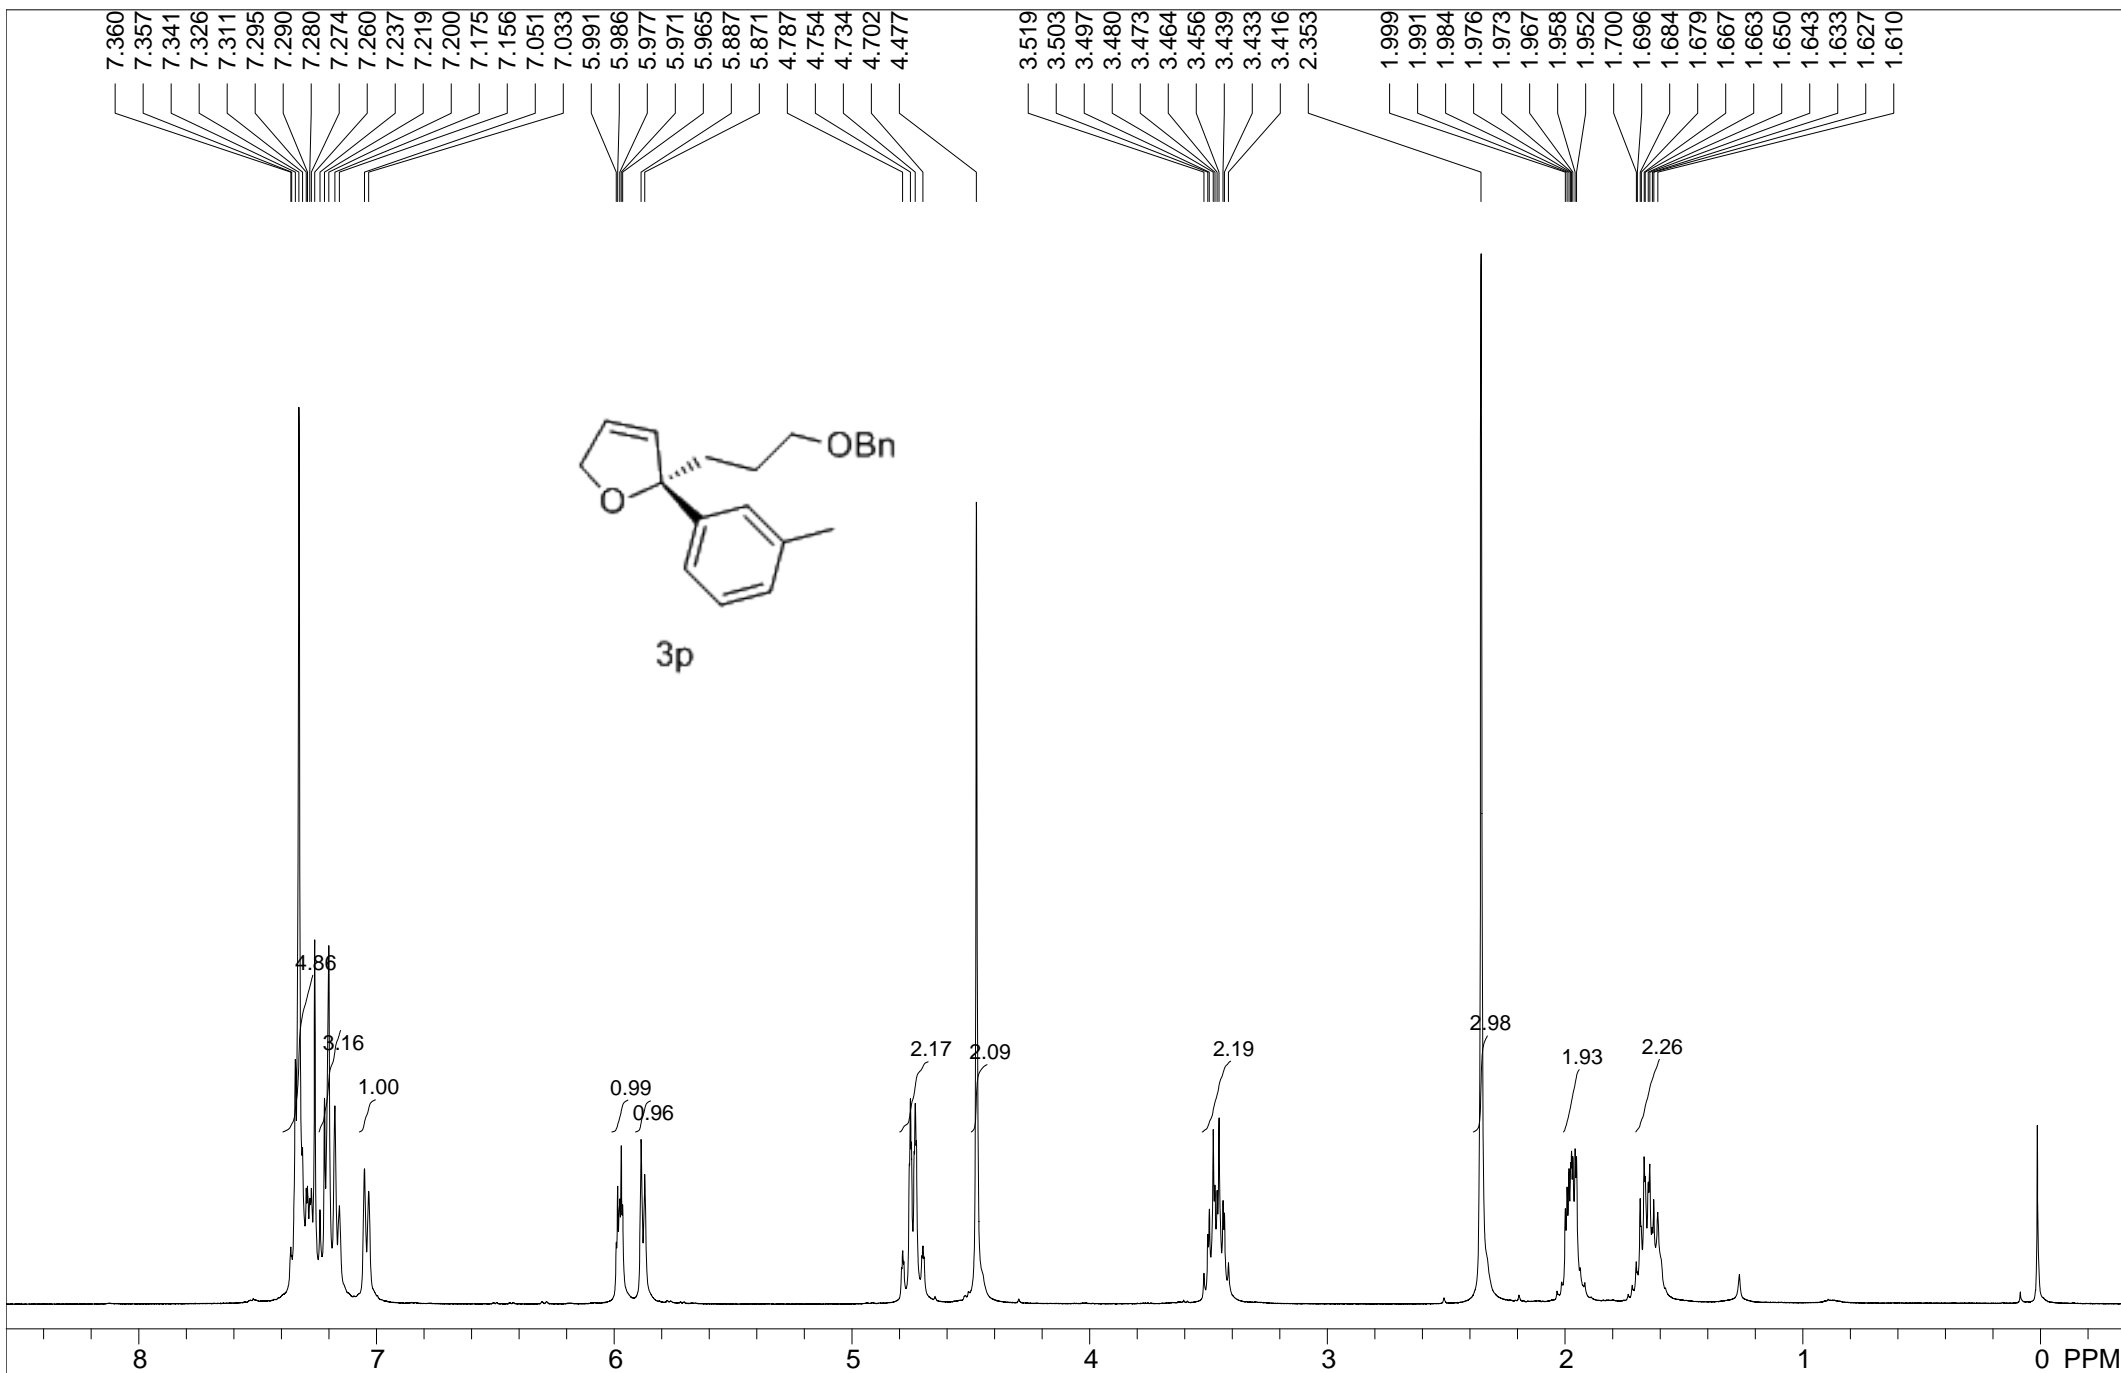

Std proton:blank line

USER: -- DATE: Jan 18 2015

|             |             |             |  |             |         |                           |
|-------------|-------------|-------------|--|-------------|---------|---------------------------|
| F1: 400.032 | F2: 100.597 | SW1: 7225   |  | OF1: 2807.3 |         | PTS1d: 21676 , 32768      |
| EX: s2pul   | PW: 10.6 us | PD: 1.0 sec |  | NA: 28      | LB: 0.0 | Nuts - \$5-94-01-HNMR.fid |

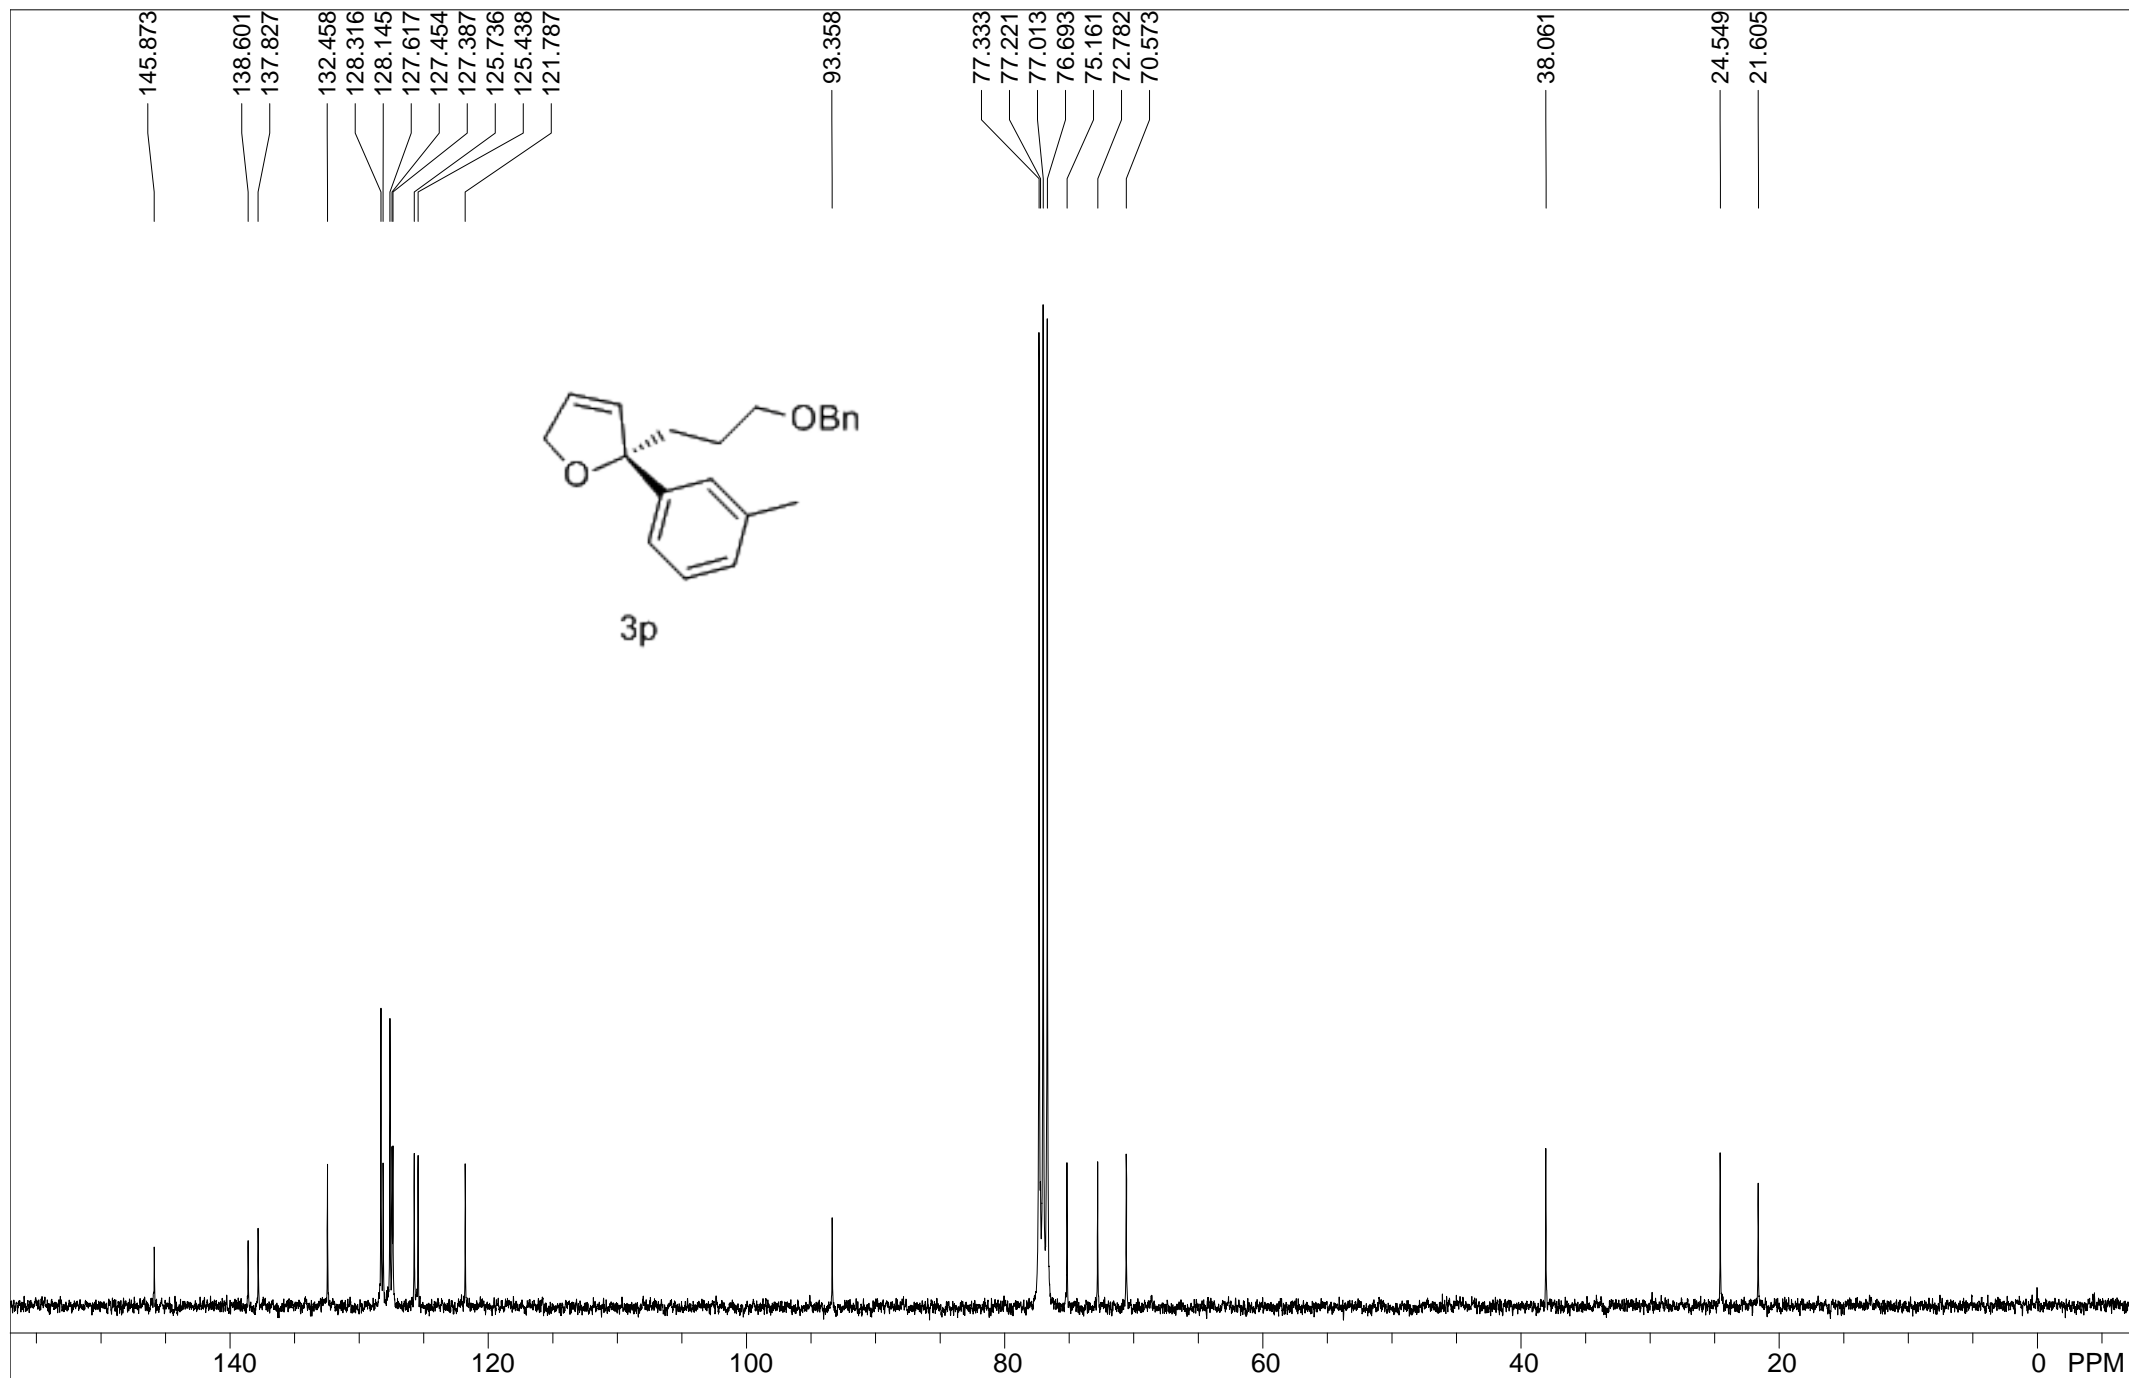

Std carbon;blank line

USER: -- DATE: Jan 18 2015

|             |             |             |  |              |         |                           |
|-------------|-------------|-------------|--|--------------|---------|---------------------------|
| F1: 100.598 | F2: 400.031 | SW1: 24510  |  | OF1: 10561.6 |         | PTS1d: 31875 , 32768      |
| EX: s2pul   | PW: 4.1 us  | PD: 1.0 sec |  | NA: 800      | LB: 2.0 | Nuts - \$5-94-01-CNMR.fid |



Sample Name: 4-96-01-rac-ad-h-9-1

```

=====
Acq. Operator   :
Sample Operator :
Acq. Instrument : SFC                               Location : Vial 53
Injection Date  : 1/15/2015 12:55:42 PM           Inj Volume : 5.000 µl
Acq. Method     : C:\CHEM32\1\METHODS\AGILENT_SFC6.M
Last changed    : 1/15/2015 12:15:57 PM by
                  (modified after loading)
Analysis Method : C:\CHEM32\1\METHODS\AGILENT_SFC6.M
Last changed    : 1/16/2015 9:23:18 AM by
                  (modified after loading)
Additional Info : Peak(s) manually integrated
  
```

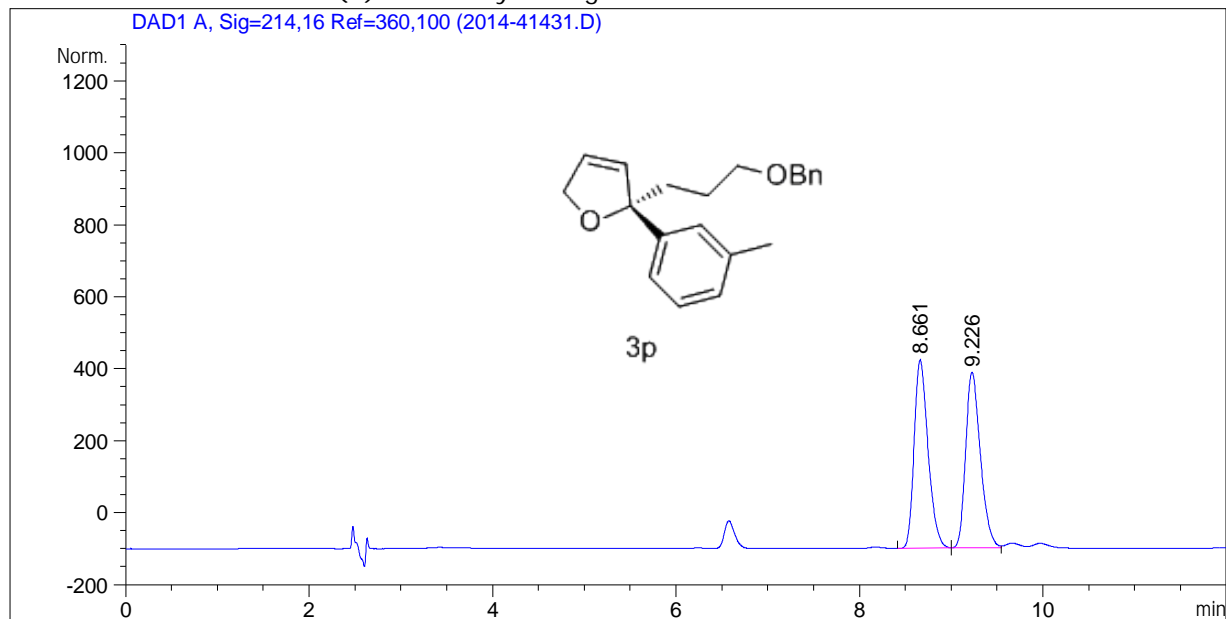

```

=====
                          Area Percent Report
=====
  
```

```

Sorted By      :      Signal
Multiplier     :      1.0000
Dilution      :      1.0000
Do not use Multiplier & Dilution Factor with ISTDs
  
```

Signal 1: DAD1 A, Sig=214,16 Ref=360,100

| Peak # | RetTime [min] | Type | Width [min] | Area [mAU*s] | Height [mAU] | Area %  |
|--------|---------------|------|-------------|--------------|--------------|---------|
| 1      | 8.661         | BB   | 0.1607      | 3182.23950   | 302.59860    | 50.2051 |
| 2      | 9.226         | BV   | 0.1716      | 3156.24194   | 282.02170    | 49.7949 |

```
Totals :                6338.48145  584.62030
```

```

=====
*** End of Report ***
  
```

Sample Name: 5-6-01

```

=====
Acq. Operator   :
Sample Operator :
Acq. Instrument : SFC                               Location : Vial 54
Injection Date  : 1/15/2015 1:11:00 PM
                                           Inj Volume : 5.000 µl
Acq. Method     : C:\CHEM32\1\METHODS\AGILENT_SFC6.M
Last changed    : 1/15/2015 12:15:57 PM by
                  (modified after loading)
Analysis Method : C:\CHEM32\1\METHODS\AGILENT_SFC6.M
Last changed    : 1/16/2015 9:26:27 AM by
                  (modified after loading)
Additional Info  : Peak(s) manually integrated
  
```

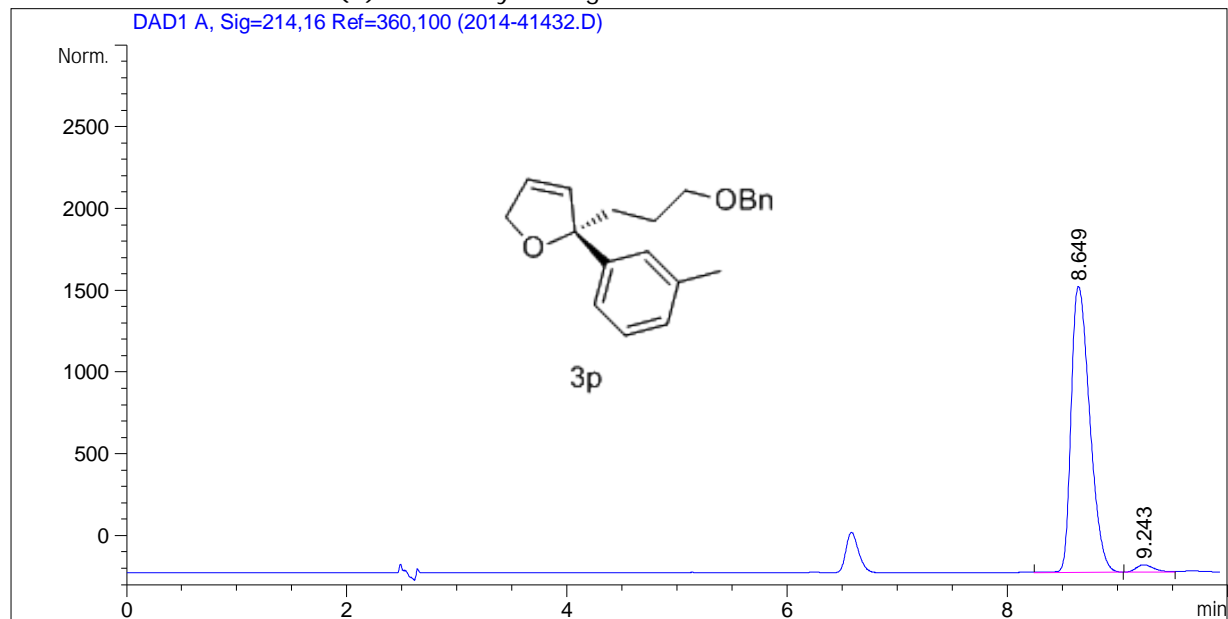

```

=====
                          Area Percent Report
=====
  
```

```

Sorted By      :      Signal
Multiplier     :      1.0000
Dilution      :      1.0000
Do not use Multiplier & Dilution Factor with ISTDs
  
```

Signal 1: DAD1 A, Sig=214,16 Ref=360,100

| Peak # | RetTime [min] | Type | Width [min] | Area [mAU*s] | Height [mAU] | Area %  |
|--------|---------------|------|-------------|--------------|--------------|---------|
| 1      | 8.649         | VB   | 0.1804      | 1.49737e4    | 1280.93835   | 97.6366 |
| 2      | 9.243         | BV   | 0.1683      | 362.45813    | 32.94715     | 2.3634  |

```
Totals :                1.53362e4  1313.88551
```

```

=====
*** End of Report ***
  
```

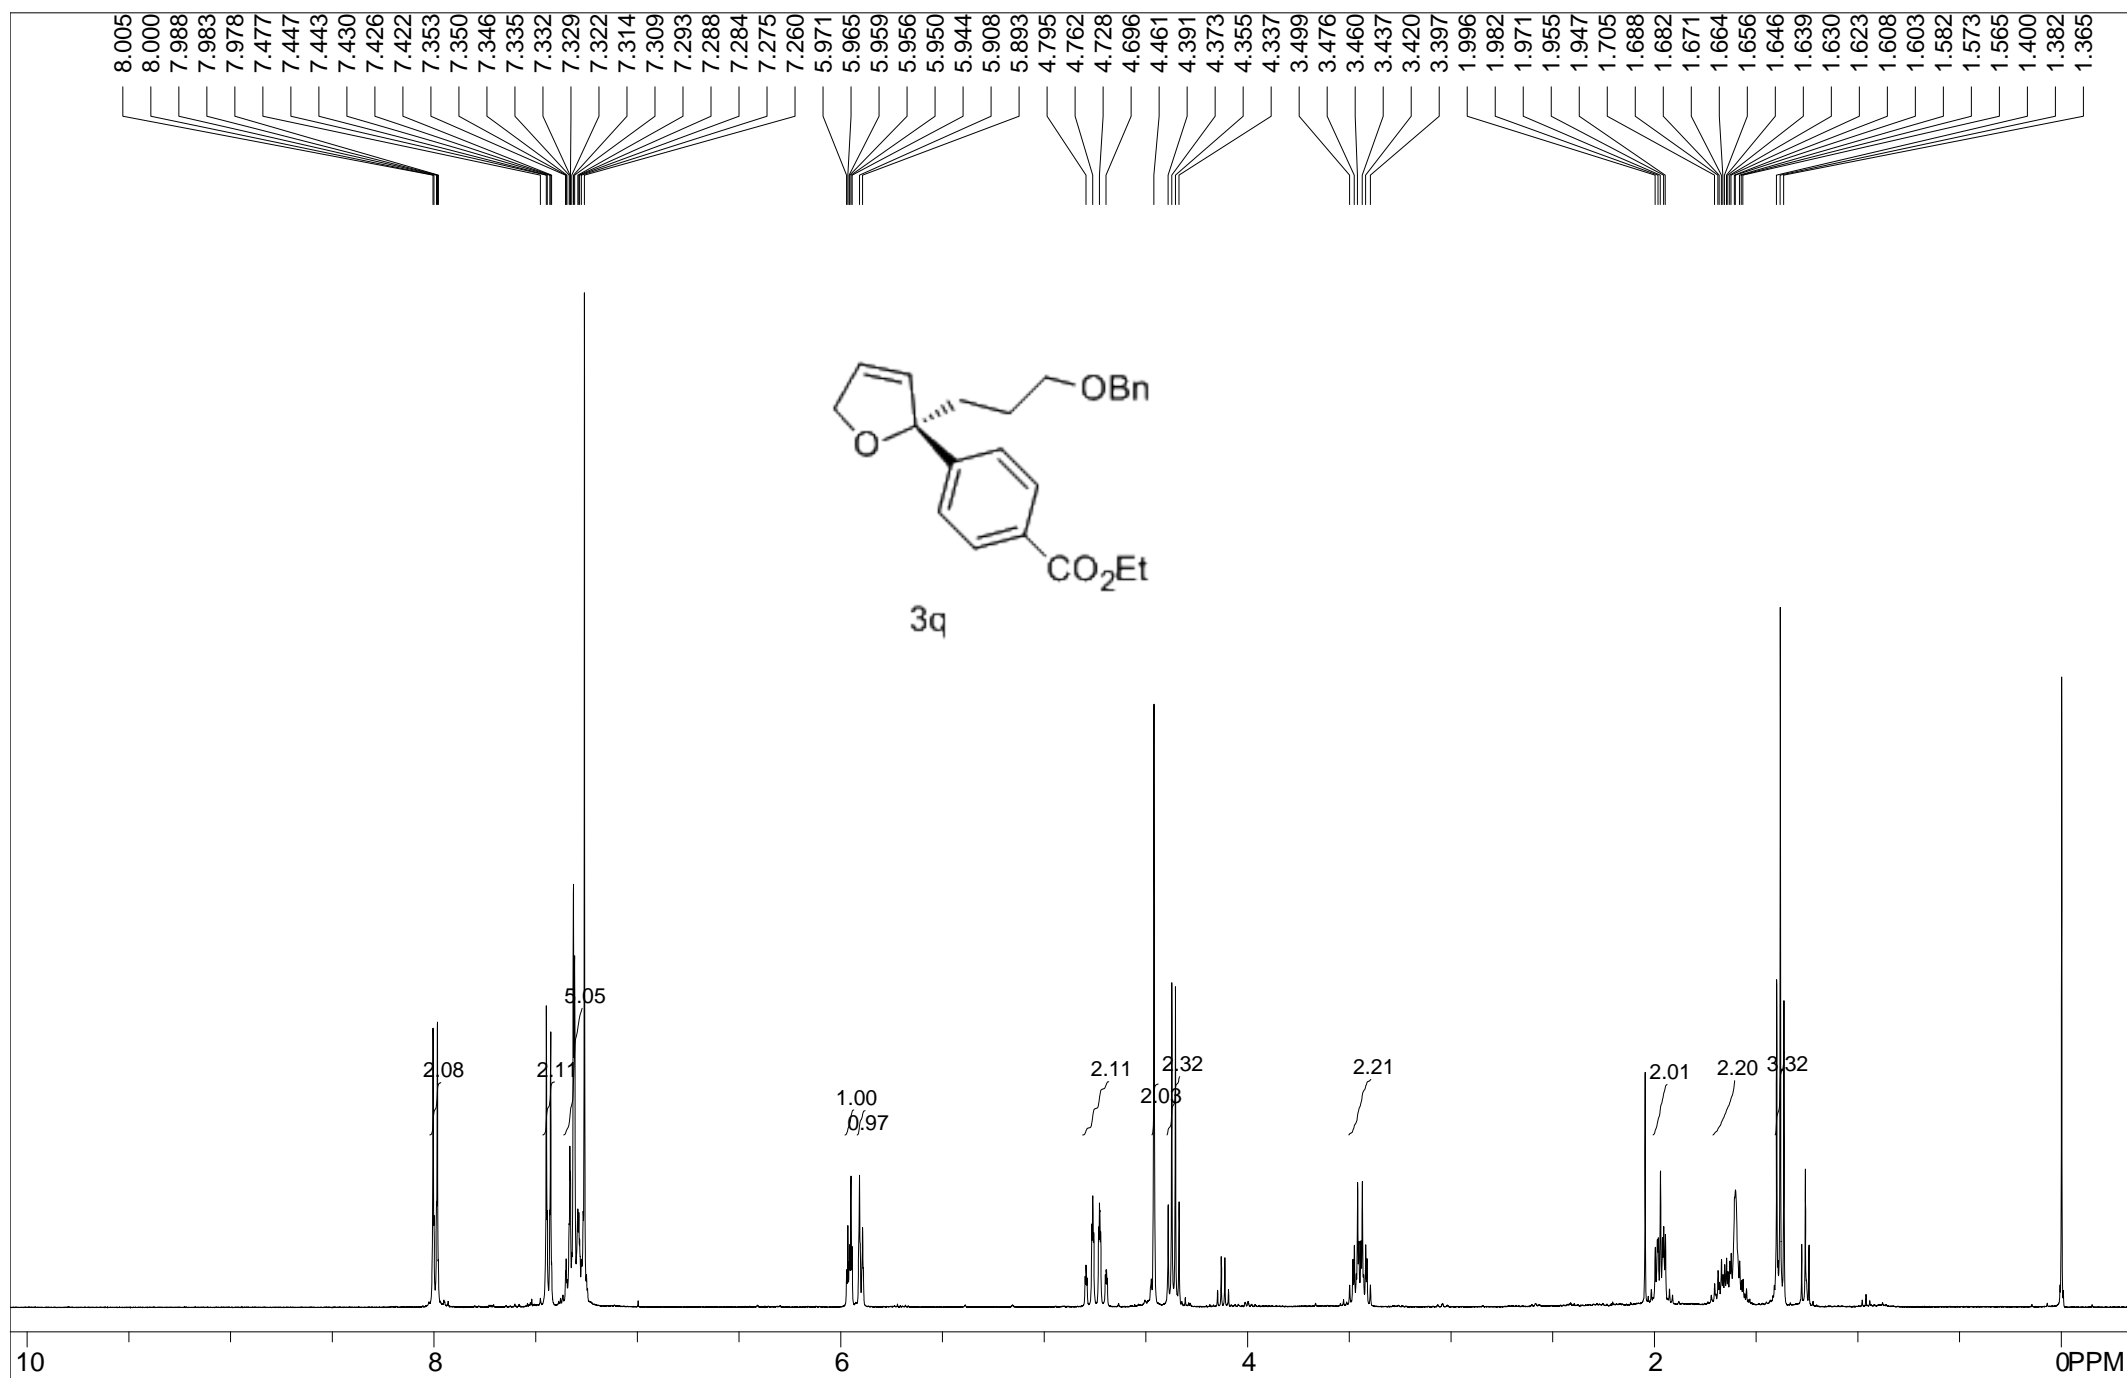

|             |             |             |  |                            |         |                             |  |
|-------------|-------------|-------------|--|----------------------------|---------|-----------------------------|--|
| :blank line |             |             |  | USER: -- DATE: Dec 25 2014 |         |                             |  |
| F1: 399.723 | F2: 100.519 | SW1: 7184   |  | OF1: 2798.5                |         | PTS1d: 21552 , 32768        |  |
| EX: s2pul   | PW: 4.4 us  | PD: 1.0 sec |  | NA: 16                     | LB: 0.0 | Nuts - \$5-38-01-HNMR-2.fid |  |

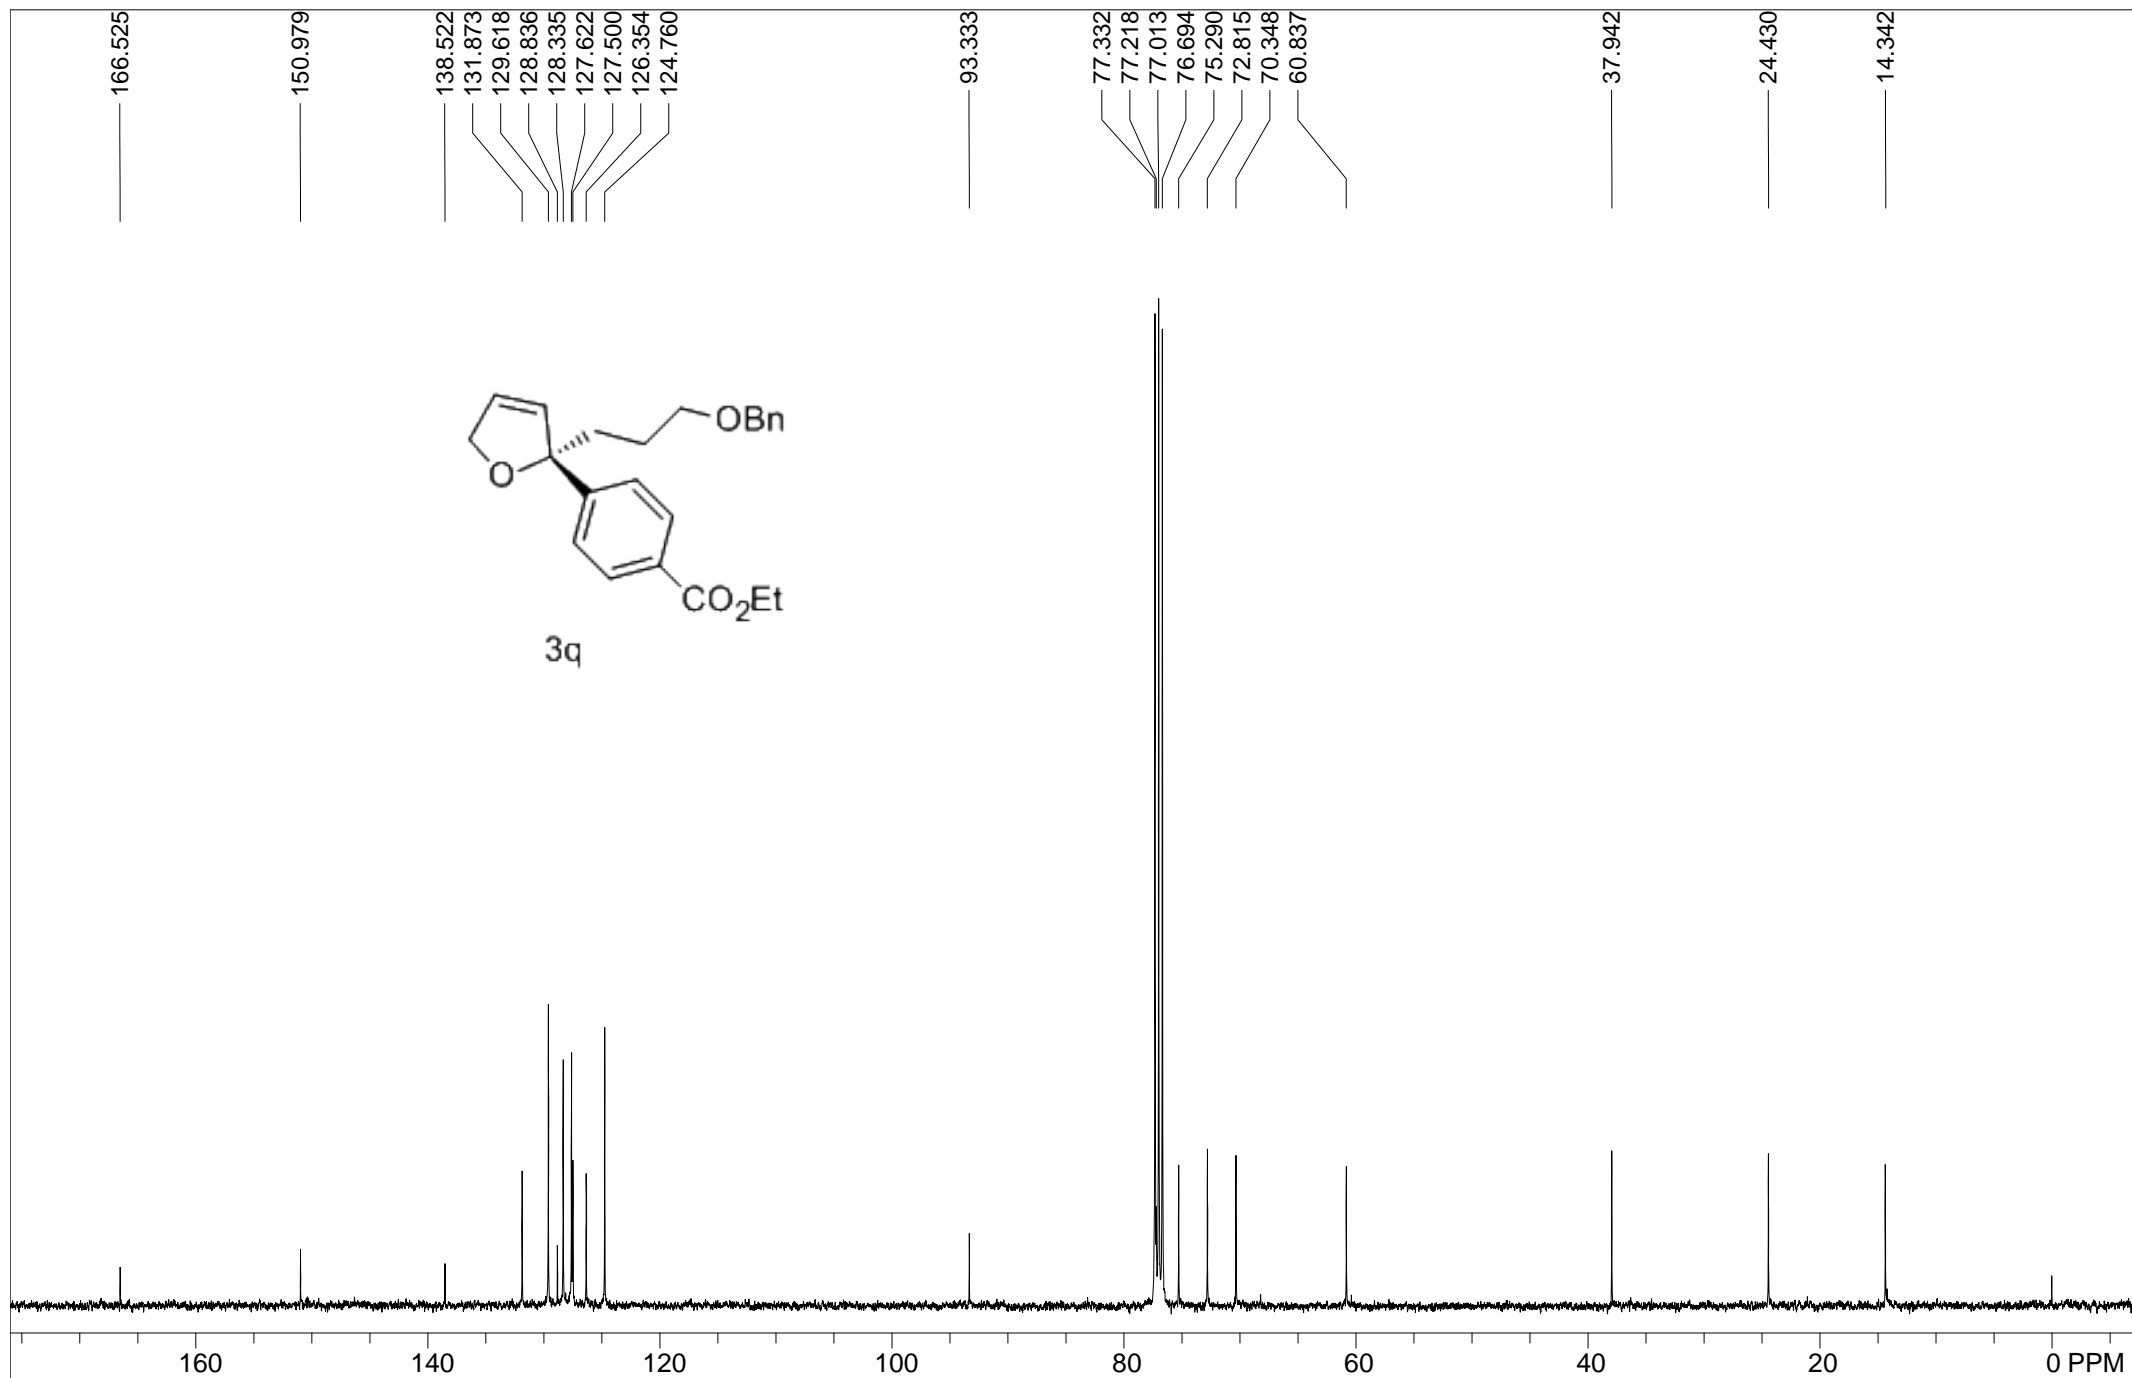

|                |             |            |             |                            |         |                              |  |
|----------------|-------------|------------|-------------|----------------------------|---------|------------------------------|--|
| new experiment |             |            |             | USER: -- DATE: Dec 25 2014 |         |                              |  |
| F1: 100.521    | F2: 399.722 | SW1: 25000 |             | OF1: 11056.0               |         | PTS1d: 32768 , 32768         |  |
| EX: s2pul      |             | PW: 4.9 us | PD: 1.0 sec | NA: 2012                   | LB: 2.0 | Nuts - \$5-38-01-CNMR-C7.fid |  |

=====  
Acq. Operator :  
Sample Operator :  
Acq. Instrument : SFC Location : Vial 31  
Injection Date : 12/30/2014 11:35:15 AM Inj Volume : 5.000 µl  
Acq. Method : C:\CHEM32\1\METHODS\AGILENT\_SFC6.M  
Last changed : 12/30/2014 11:30:49 AM by  
(modified after loading)  
Analysis Method : C:\CHEM32\1\METHODS\AGILENT\_SFC6.M  
Last changed : 12/30/2014 4:34:28 PM by  
(modified after loading)  
Additional Info : Peak(s) manually integrated

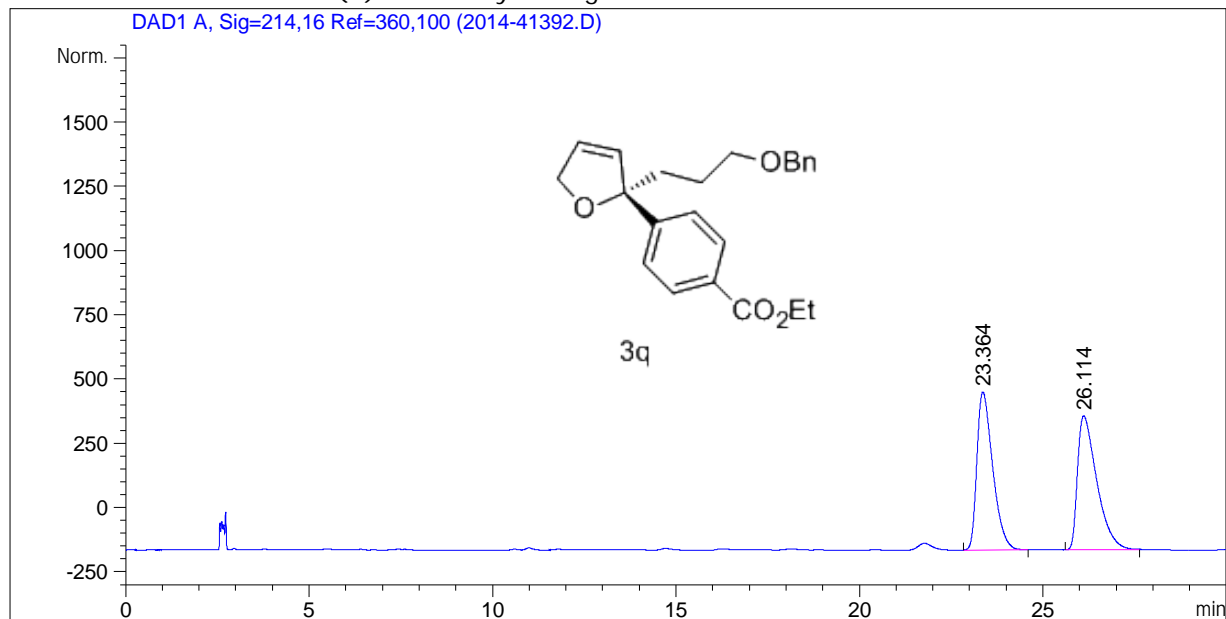

=====  
Area Percent Report  
=====

Sorted By : Signal  
Multiplier : 1.0000  
Dilution : 1.0000  
Do not use Multiplier & Dilution Factor with ISTDs

Signal 1: DAD1 A, Sig=214,16 Ref=360,100

| Peak # | RetTime [min] | Type | Width [min] | Area [mAU*s] | Height [mAU] | Area %  |
|--------|---------------|------|-------------|--------------|--------------|---------|
| 1      | 23.364        | BB   | 0.4497      | 7733.57275   | 258.76208    | 49.1585 |
| 2      | 26.114        | BV   | 0.5266      | 7998.33496   | 219.25304    | 50.8415 |

Totals : 1.57319e4 478.01512

=====  
\*\*\* End of Report \*\*\*

Sample Name: 5-39-01

```

=====
Acq. Operator   :
Sample Operator :
Acq. Instrument : SFC                               Location : Vial 32
Injection Date  : 12/30/2014 12:22:09 PM          Inj Volume : 5.000 µl

Acq. Method     : C:\CHEM32\1\METHODS\AGILENT_SFC6.M
Last changed    : 12/30/2014 11:30:49 AM by
                  (modified after loading)
Analysis Method : C:\CHEM32\1\METHODS\AGILENT_SFC6.M
Last changed    : 12/30/2014 4:31:33 PM by
                  (modified after loading)
Additional Info  : Peak(s) manually integrated
  
```

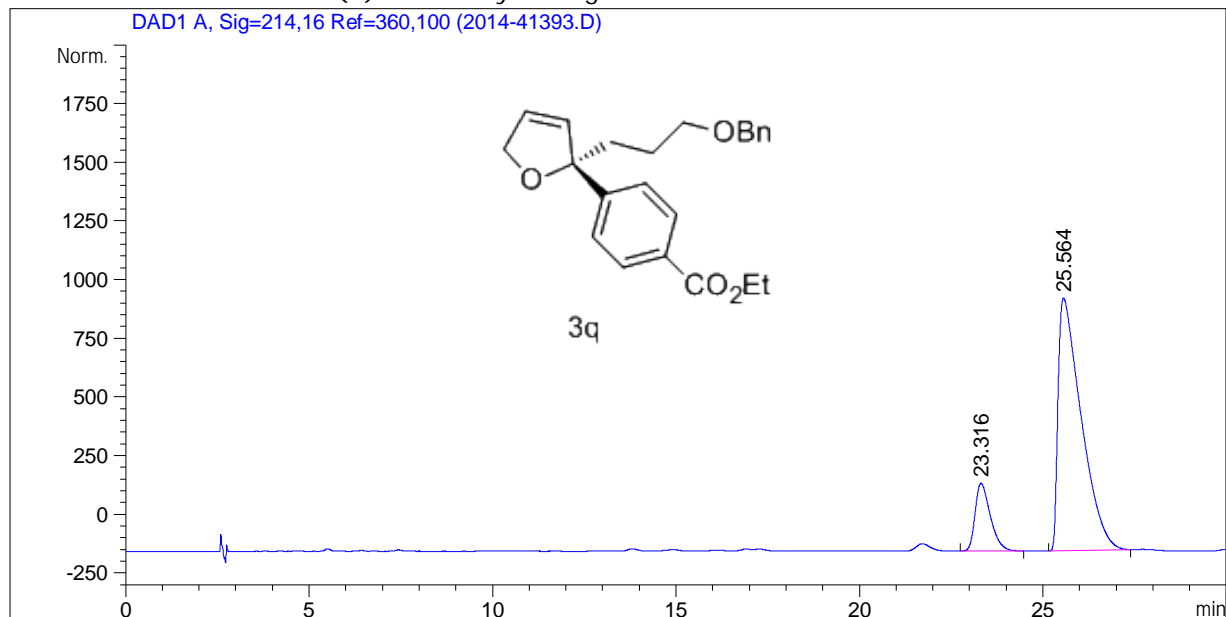

```

=====
                          Area Percent Report
=====
  
```

```

Sorted By           :      Signal
Multiplier          :      1.0000
Dilution            :      1.0000
Do not use Multiplier & Dilution Factor with ISTDs
  
```

Signal 1: DAD1 A, Sig=214,16 Ref=360,100

| Peak # | RetTime [min] | Type | Width [min] | Area [mAU*s] | Height [mAU] | Area %  |
|--------|---------------|------|-------------|--------------|--------------|---------|
| 1      | 23.316        | BB   | 0.4251      | 5740.46777   | 199.27560    | 14.9926 |
| 2      | 25.564        | BB   | 0.6040      | 3.25482e4    | 744.50433    | 85.0074 |

```
Totals :                3.82886e4  943.77994
```

```

=====
*** End of Report ***
  
```

7.330  
7.310  
7.292  
7.260  
7.258  
7.255  
7.237  
7.177  
7.160  
7.142  
6.225  
6.219  
6.212  
6.211  
6.210  
6.203  
6.197  
5.821  
5.818  
5.814  
5.806  
5.802  
5.798  
4.845  
4.841  
4.835  
4.814  
4.810  
4.804  
4.749  
4.745  
4.739  
4.719  
4.714  
4.709

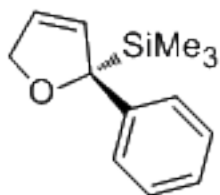

3r

2.02  
1.82  
0.95

0.97

0.95

2.14

9.21

0.007

8 7 6 5 4 3 2 1 0 PPM

|             |             |             |  |                            |         |                             |  |
|-------------|-------------|-------------|--|----------------------------|---------|-----------------------------|--|
| :blank line |             |             |  | USER: -- DATE: Jan 23 2015 |         |                             |  |
| F1: 399.723 | F2: 100.519 | SW1: 7143   |  | OF1: 2778.7                |         | PTS1d: 21429 , 32768        |  |
| EX: s2pul   | PW: 4.4 us  | PD: 1.0 sec |  | NA: 8                      | LB: 0.0 | Nuts - \$5-99-01-HNMR-1.fid |  |

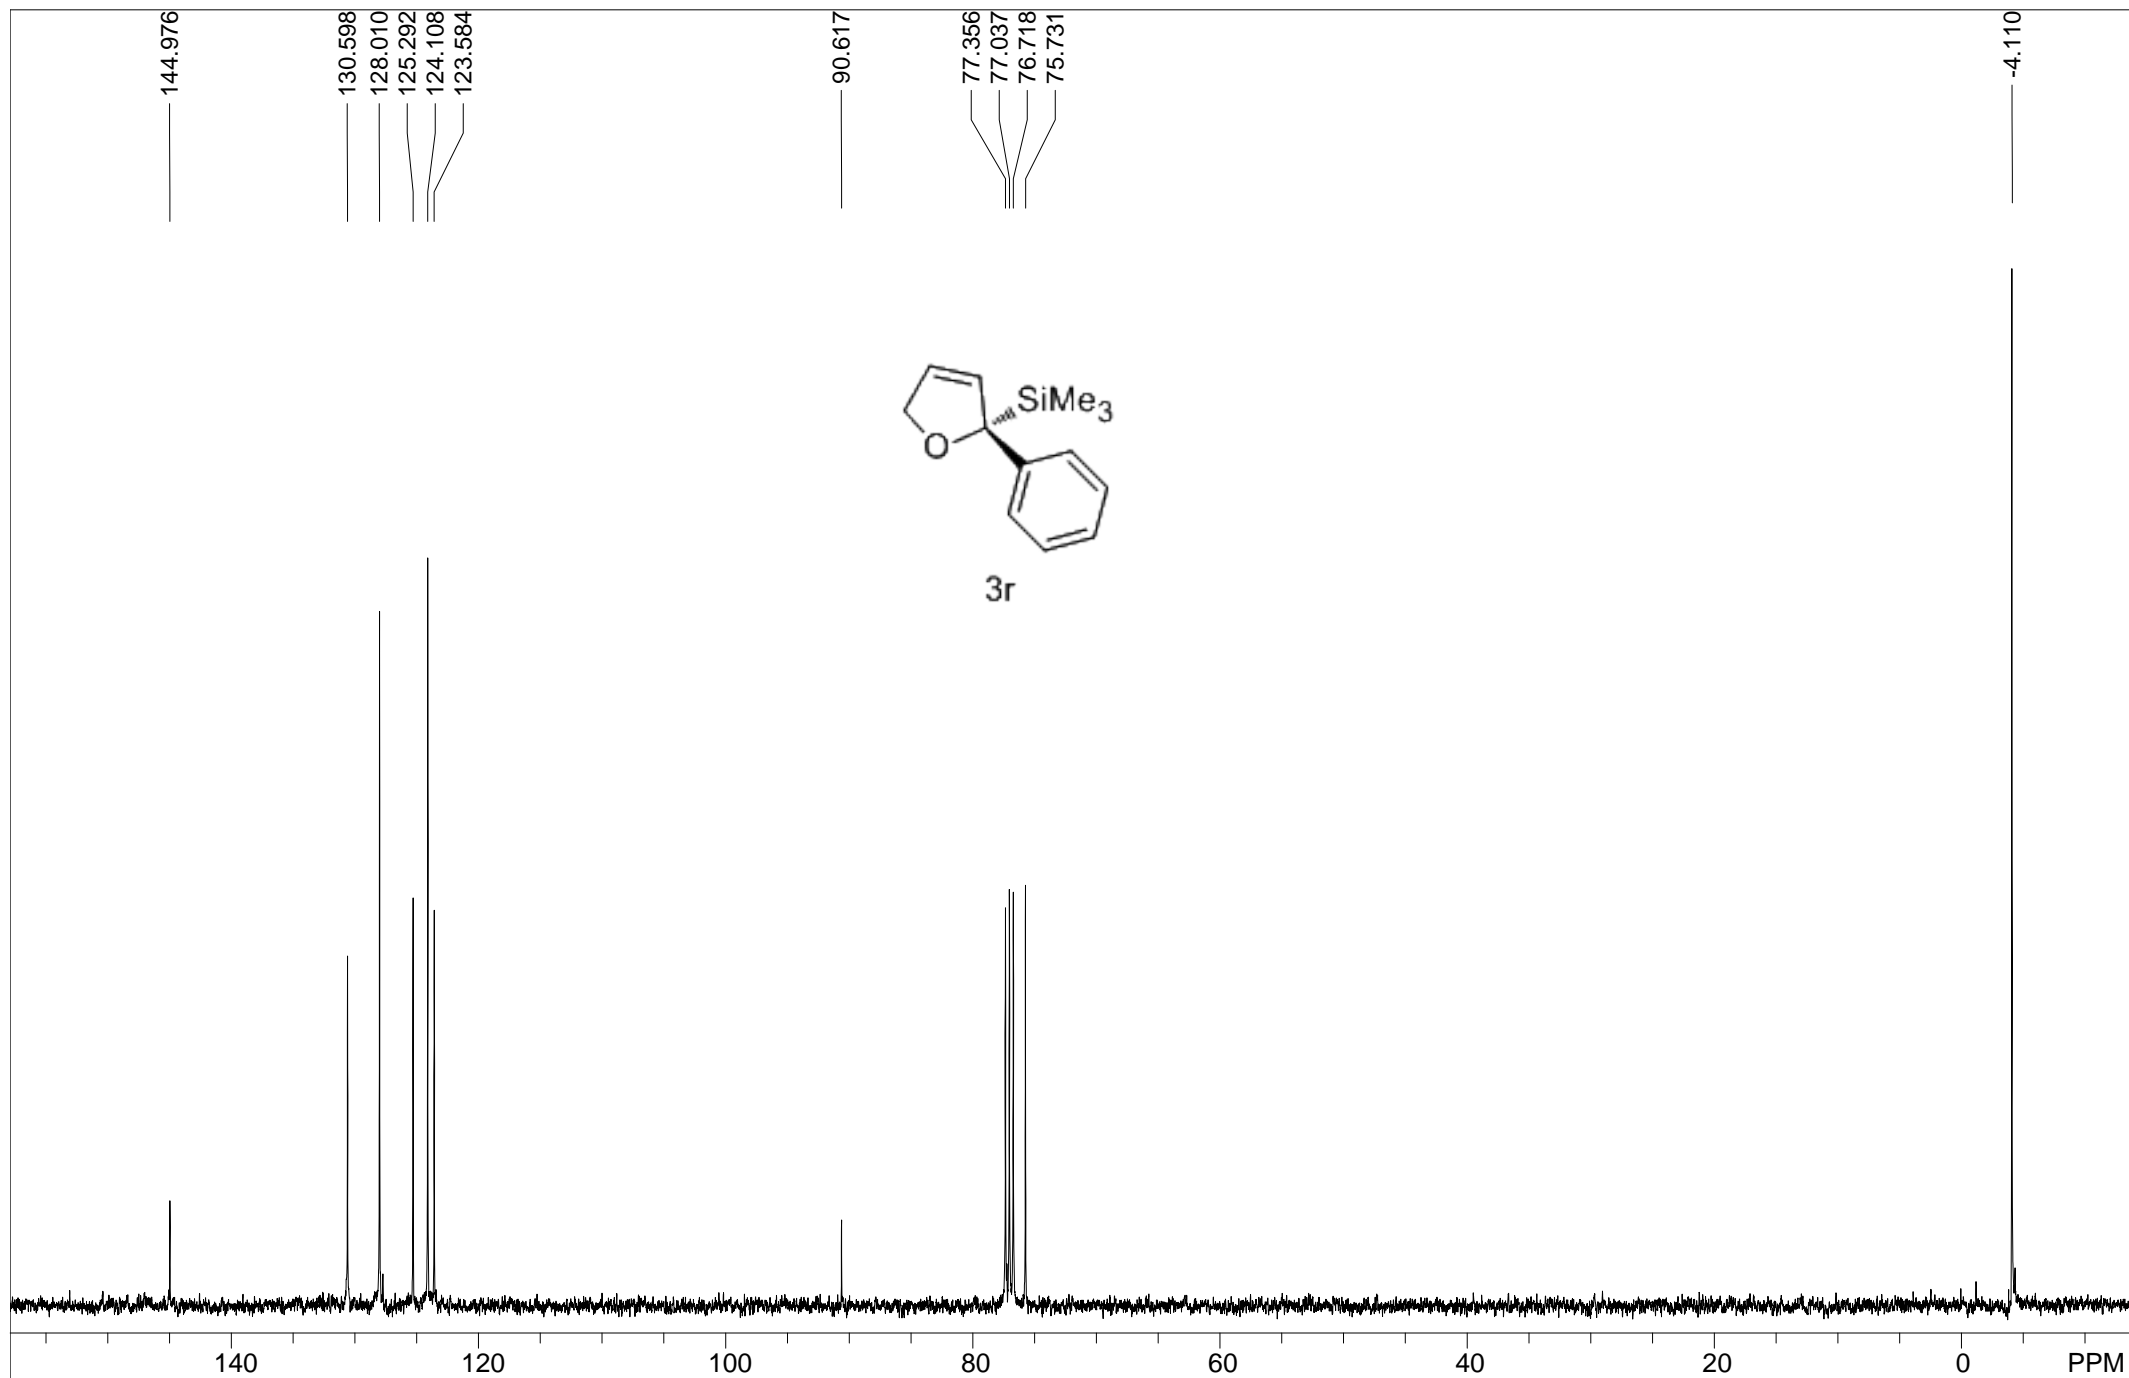

new experiment

USER: -- DATE: Jan 23 2015

|             |             |             |              |                      |
|-------------|-------------|-------------|--------------|----------------------|
| F1: 100.521 | F2: 399.722 | SW1: 25000  | OF1: 11056.1 | PTS1d: 32768 , 32768 |
| EX: s2pul   | PW: 4.9 us  | PD: 1.0 sec | NA: 120      | LB: 2.0              |

Nuts - \$5-99-01-CNMR-3.fid



Sample Name: 5-99-01-rac

```

=====
Acq. Operator   :
Sample Operator :
Acq. Instrument : SFC                               Location : Vial 11
Injection Date  : 1/26/2015 2:43:22 PM
                                           Inj Volume : 5.000 µl
Acq. Method    : C:\CHEM32\1\METHODS\AGILENT_SFC6.M
Last changed   : 1/26/2015 2:34:57 PM by
                (modified after loading)
Analysis Method : C:\CHEM32\1\METHODS\AGILENT_SFC6.M
Last changed   : 1/26/2015 2:58:38 PM by
                (modified after loading)
Additional Info : Peak(s) manually integrated
  
```

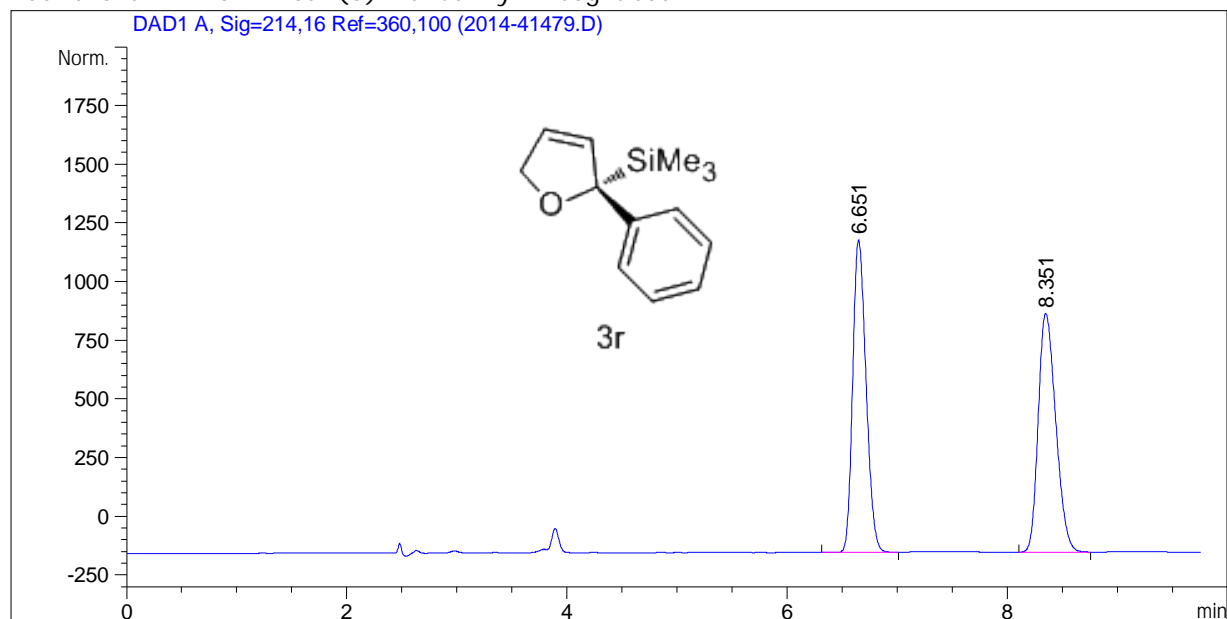

```

=====
                          Area Percent Report
=====
  
```

```

Sorted By      :      Signal
Multiplier     :      1.0000
Dilution       :      1.0000
Do not use Multiplier & Dilution Factor with ISTDs
  
```

Signal 1: DAD1 A, Sig=214,16 Ref=360,100

| Peak # | RetTime [min] | Type | Width [min] | Area [mAU*s] | Height [mAU] | Area %  |
|--------|---------------|------|-------------|--------------|--------------|---------|
| 1      | 6.651         | BB   | 0.1314      | 8516.81934   | 1010.27557   | 49.9638 |
| 2      | 8.351         | VB   | 0.1728      | 8529.14941   | 772.28247    | 50.0362 |

```
Totals :                1.70460e4  1782.55804
```

```

=====
*** End of Report ***
  
```

=====  
Acq. Operator :  
Sample Operator :  
Acq. Instrument : SFC Location : Vial 12  
Injection Date : 1/26/2015 2:56:07 PM Inj Volume : 5.000 µl  
Acq. Method : C:\CHEM32\1\METHODS\AGILENT\_SFC6.M  
Last changed : 1/26/2015 2:34:57 PM by  
(modified after loading)  
Analysis Method : C:\CHEM32\1\METHODS\AGILENT\_SFC6.M  
Last changed : 1/26/2015 3:06:19 PM by  
(modified after loading)  
Additional Info : Peak(s) manually integrated

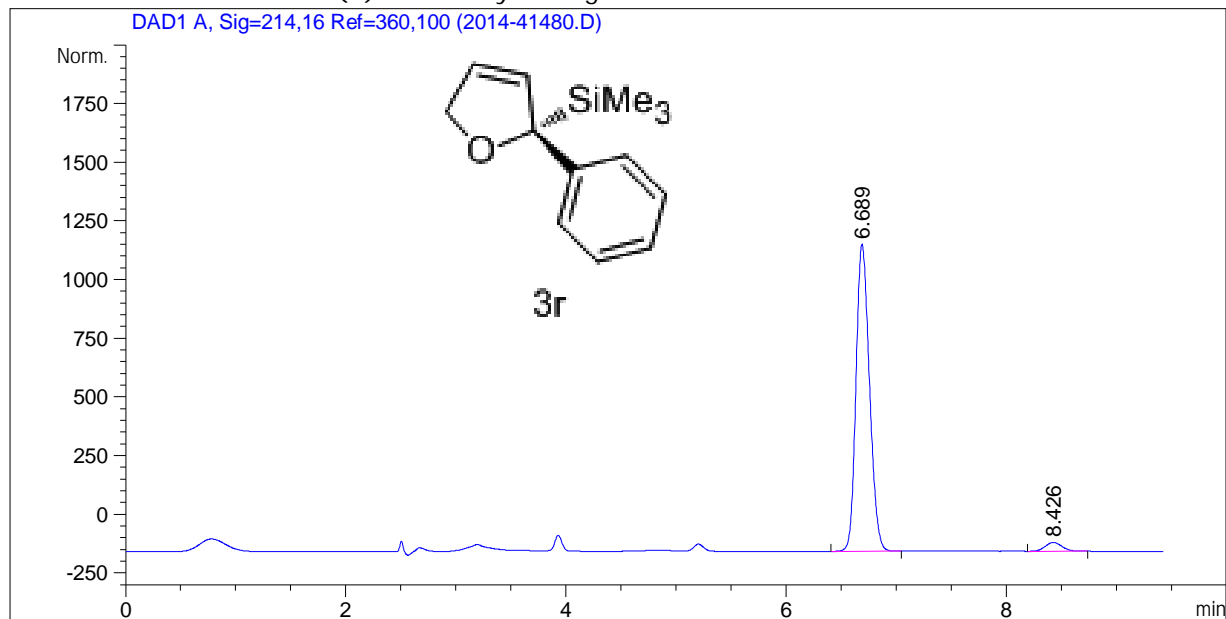

=====  
Area Percent Report  
=====

Sorted By : Signal  
Multiplier : 1.0000  
Dilution : 1.0000  
Do not use Multiplier & Dilution Factor with ISTDs

Signal 1: DAD1 A, Sig=214,16 Ref=360,100

| Peak # | RetTime [min] | Type | Width [min] | Area [mAU*s] | Height [mAU] | Area %  |
|--------|---------------|------|-------------|--------------|--------------|---------|
| 1      | 6.689         | BB   | 0.1321      | 8363.52344   | 984.79285    | 96.5345 |
| 2      | 8.426         | BB   | 0.1657      | 300.24121    | 28.31061     | 3.4655  |

Totals : 8663.76465 1013.10346

=====  
\*\*\* End of Report \*\*\*

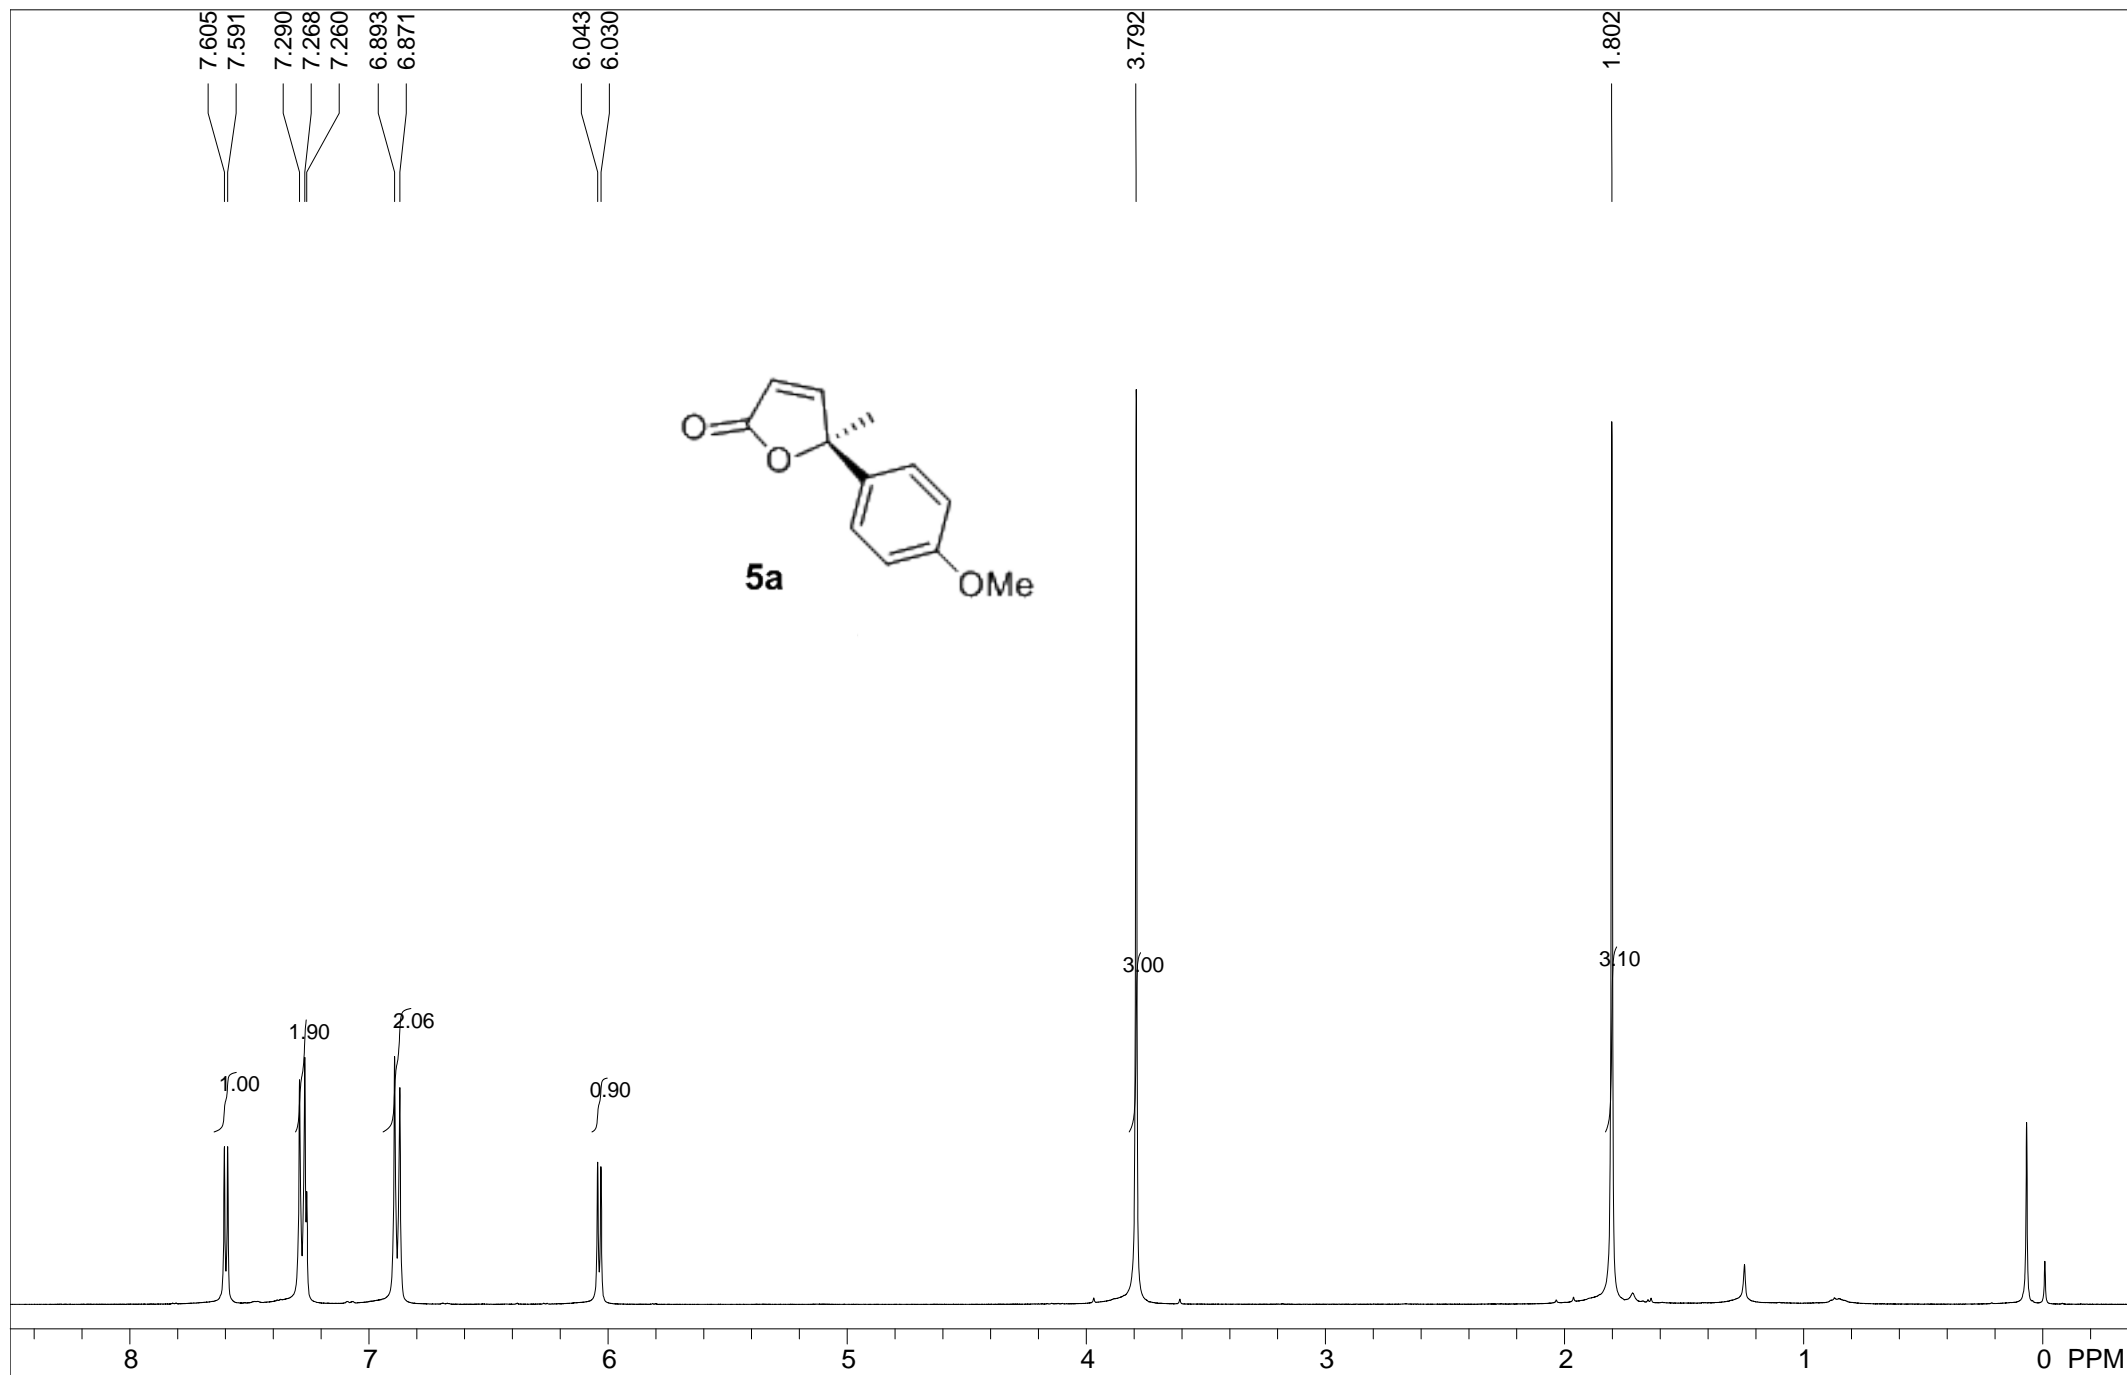

Std proton;blank line

USER: -- DATE: Jan 12 2015

F1: 400.032

F2: 100.597

SW1: 7225

OF1: 2807.5

PTS1d: 21676 , 32768

EX: s2pul

PW: 10.6 us

PD: 1.0 sec

NA: 8

LB: 0.0

Nuts - \$5-82-01-HNMR.fid

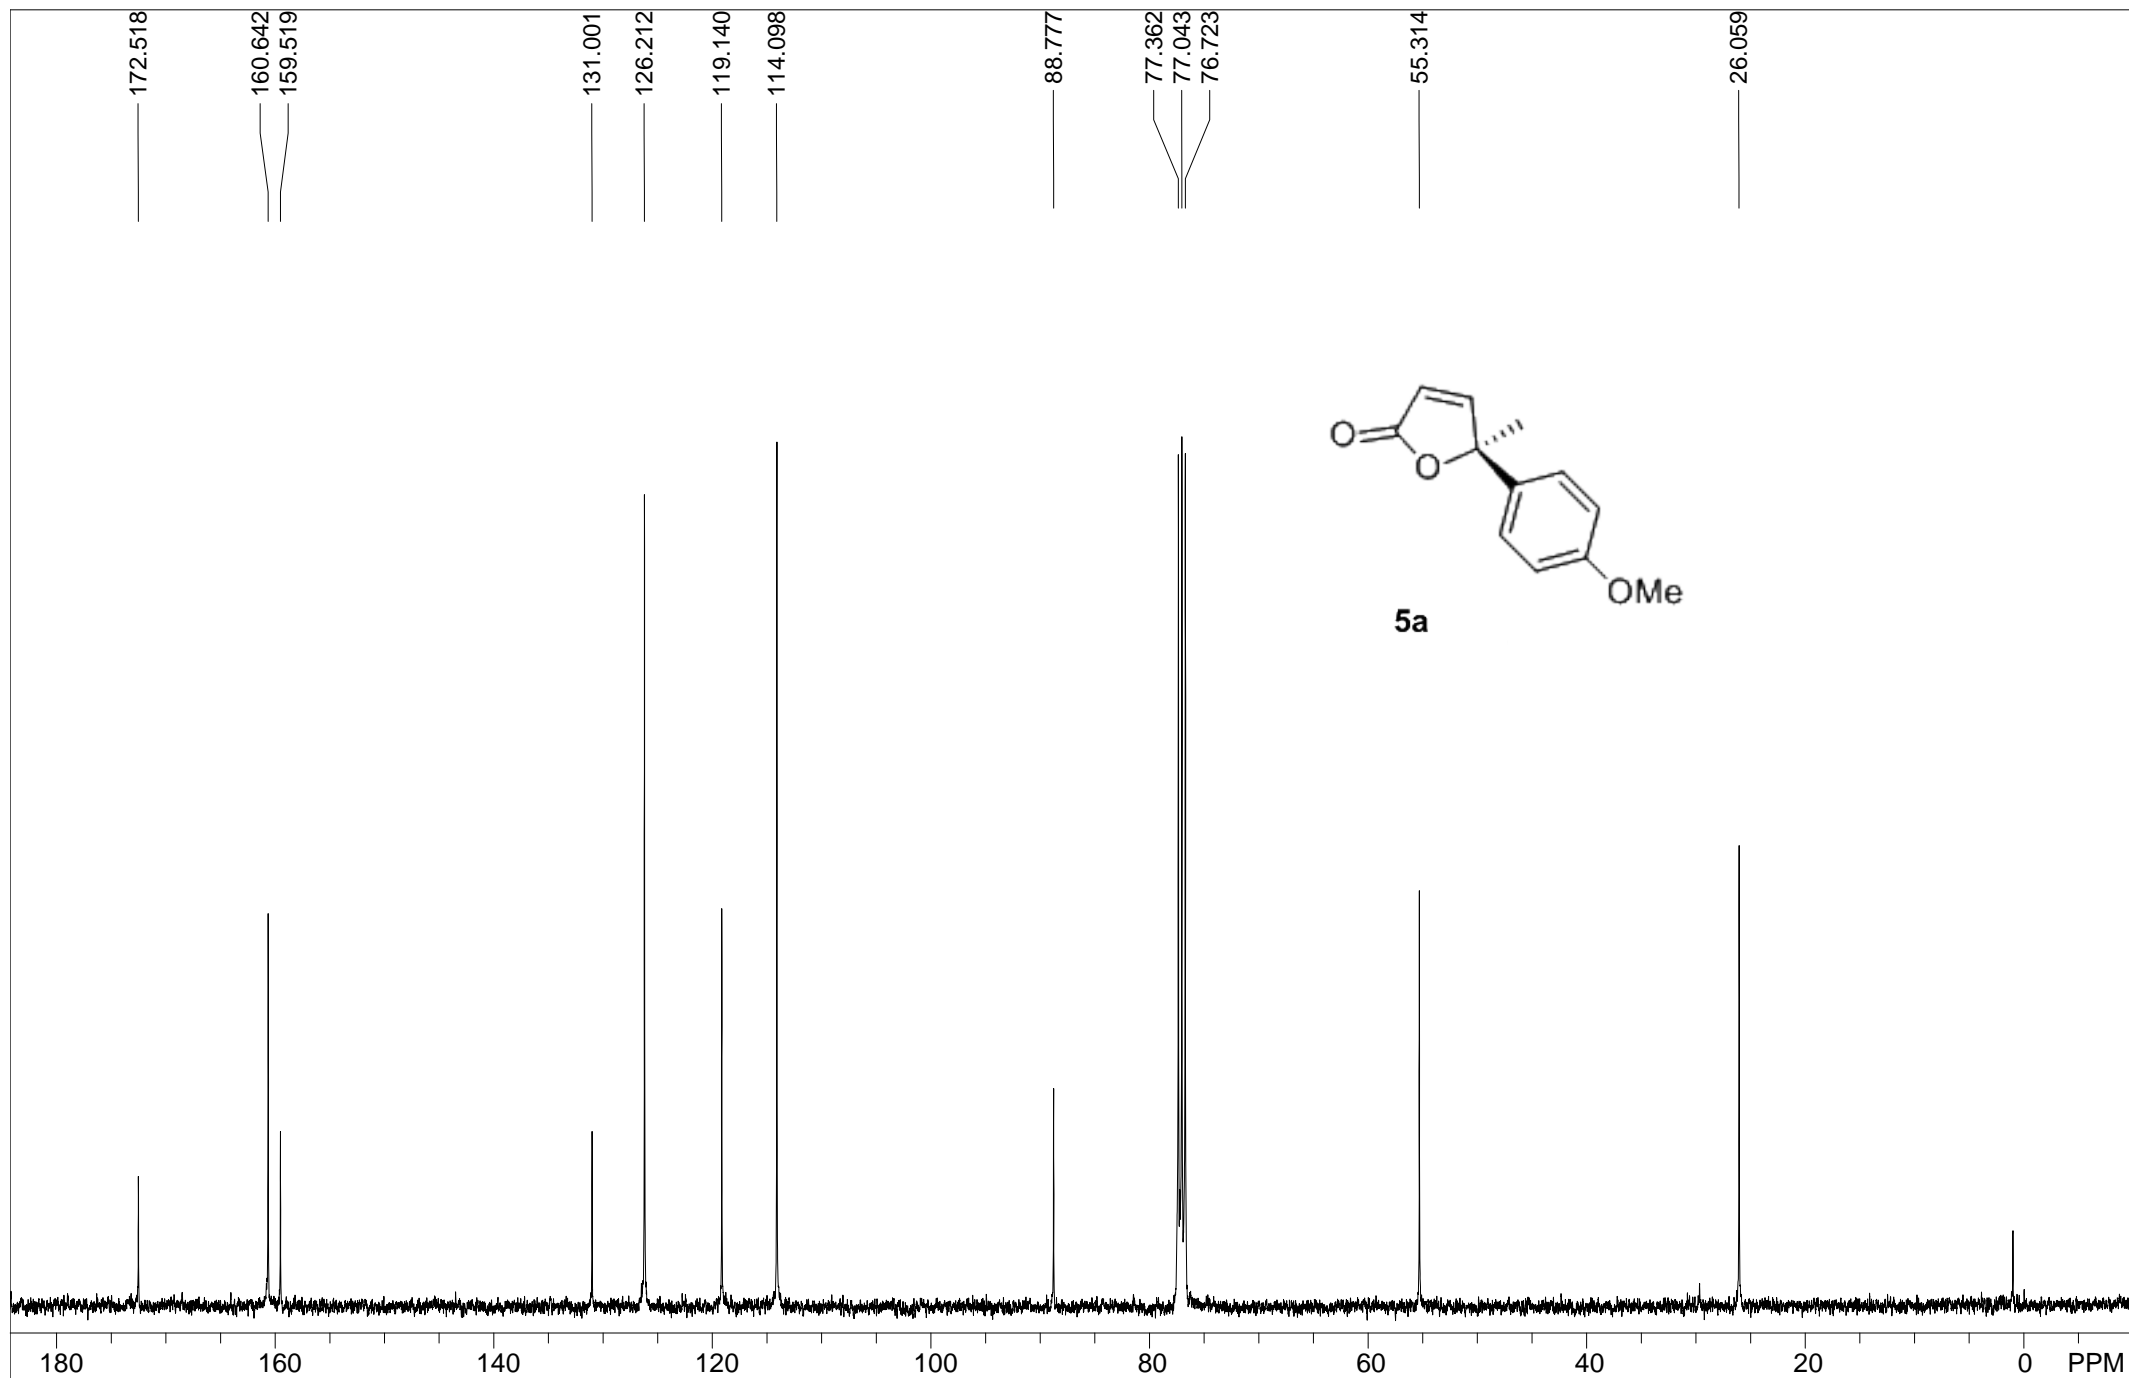

Std carbon:blank line

USER: -- DATE: Jan 12 2015

|             |             |             |  |              |         |                             |
|-------------|-------------|-------------|--|--------------|---------|-----------------------------|
| F1: 100.598 | F2: 400.031 | SW1: 24510  |  | OF1: 10561.6 |         | PTS1d: 31875 , 32768        |
| EX: s2pul   | PW: 4.1 us  | PD: 1.0 sec |  | NA: 600      | LB: 2.0 | Nuts - \$5-82-01-CNMR-3.fid |

Sample Name: 5-77-01

```

=====
Acq. Operator   :
Sample Operator :
Acq. Instrument : SFC                               Location : Vial 52
Injection Date  : 1/15/2015 12:42:33 PM           Inj Volume : 5.000 µl
Acq. Method     : C:\CHEM32\1\METHODS\AGILENT_SFC6.M
Last changed    : 1/15/2015 12:15:57 PM by
                  (modified after loading)
Analysis Method : C:\CHEM32\1\METHODS\AGILENT_SFC6.M
Last changed    : 1/16/2015 9:20:58 AM by
                  (modified after loading)
Additional Info  : Peak(s) manually integrated
  
```

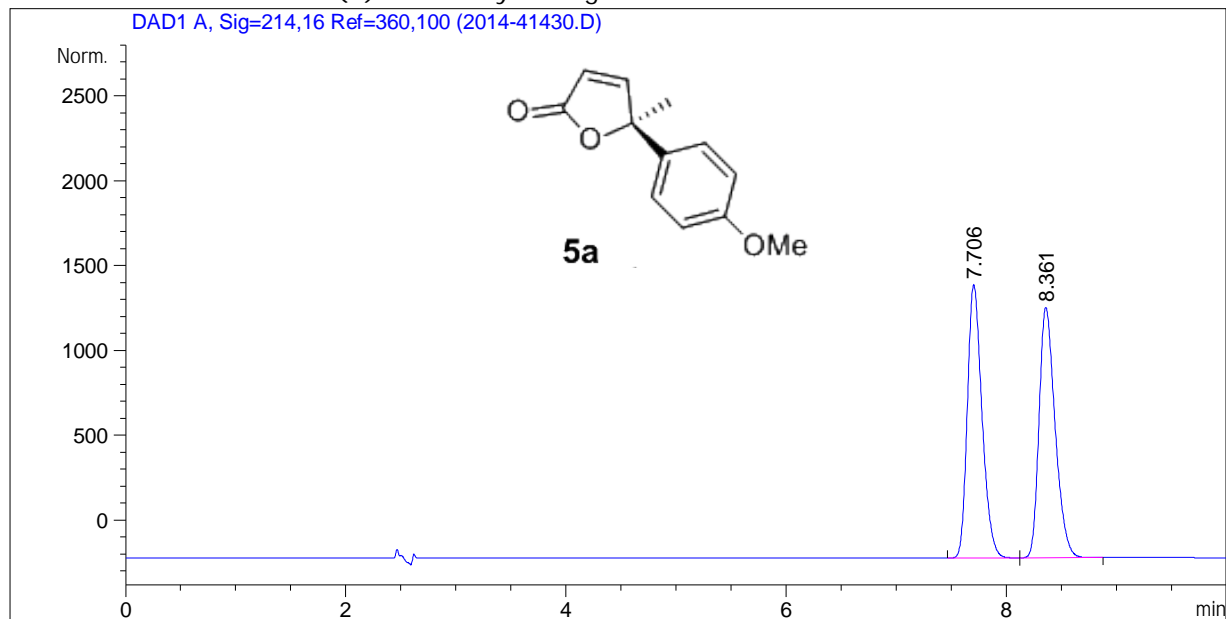

```

=====
                          Area Percent Report
=====
  
```

```

Sorted By      :      Signal
Multiplier     :      1.0000
Dilution       :      1.0000
Do not use Multiplier & Dilution Factor with ISTDs
  
```

Signal 1: DAD1 A, Sig=214,16 Ref=360,100

| Peak # | RetTime [min] | Type | Width [min] | Area [mAU*s] | Height [mAU] | Area %  |
|--------|---------------|------|-------------|--------------|--------------|---------|
| 1      | 7.706         | BB   | 0.1420      | 1.06550e4    | 1151.22827   | 49.9148 |
| 2      | 8.361         | BV   | 0.1553      | 1.06914e4    | 1053.94348   | 50.0852 |

```
Totals :                2.13464e4  2205.17175
```

```

=====
*** End of Report ***
  
```

Sample Name: 5-83-01

```

=====
Acq. Operator   :
Sample Operator :
Acq. Instrument : SFC                               Location : Vial 51
Injection Date  : 1/15/2015 12:27:00 PM           Inj Volume : 5.000 µl
Acq. Method    : C:\CHEM32\1\METHODS\AGILENT_SFC6.M
Last changed   : 1/15/2015 12:15:57 PM by
                (modified after loading)
Analysis Method : C:\CHEM32\1\METHODS\AGILENT_SFC6.M
Last changed   : 1/16/2015 9:19:28 AM by
                (modified after loading)
Additional Info : Peak(s) manually integrated
  
```

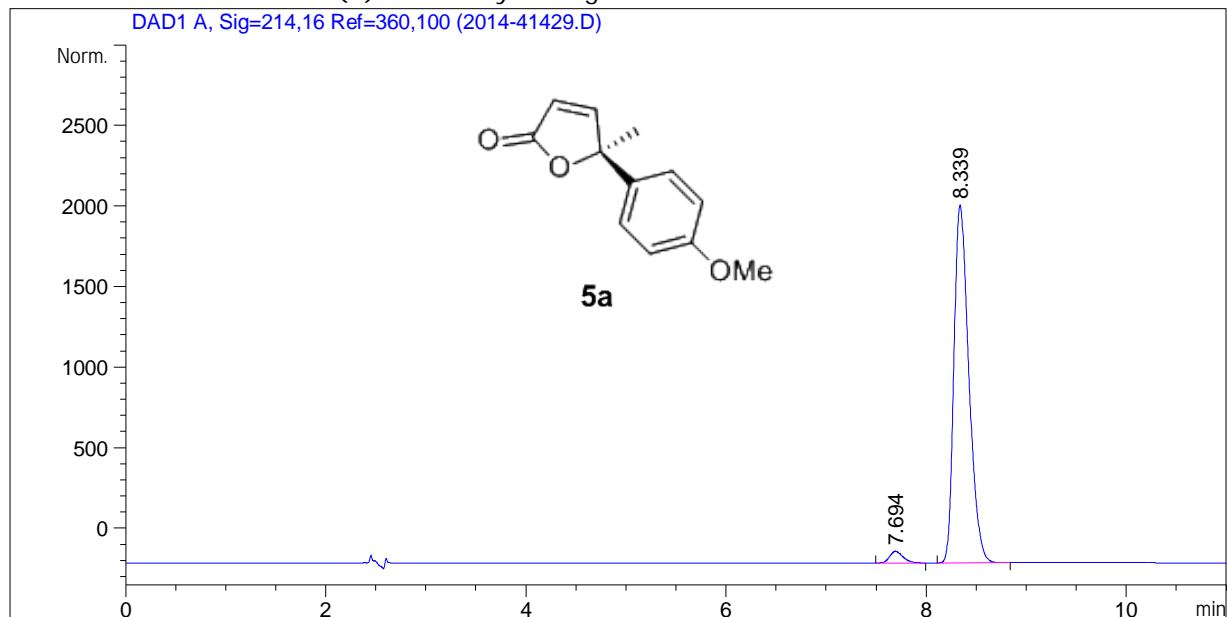

```

=====
                          Area Percent Report
=====
  
```

```

Sorted By      :      Signal
Multiplier     :      1.0000
Dilution       :      1.0000
Do not use Multiplier & Dilution Factor with ISTDs
  
```

Signal 1: DAD1 A, Sig=214,16 Ref=360,100

| Peak # | RetTime [min] | Type | Width [min] | Area [mAU*s] | Height [mAU] | Area %  |
|--------|---------------|------|-------------|--------------|--------------|---------|
| 1      | 7.694         | BB   | 0.1380      | 528.00000    | 58.09327     | 2.7862  |
| 2      | 8.339         | BB   | 0.1587      | 1.84224e4    | 1780.41638   | 97.2138 |

```
Totals :                1.89504e4  1838.50965
```

```

=====
*** End of Report ***
  
```

7.652  
7.637  
7.377  
7.366  
7.352  
7.344  
7.334  
7.325  
7.313  
7.304  
7.302  
7.260

6.051  
6.037

1.820

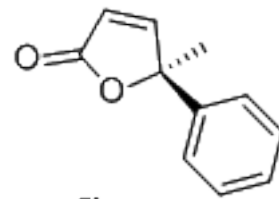

5b

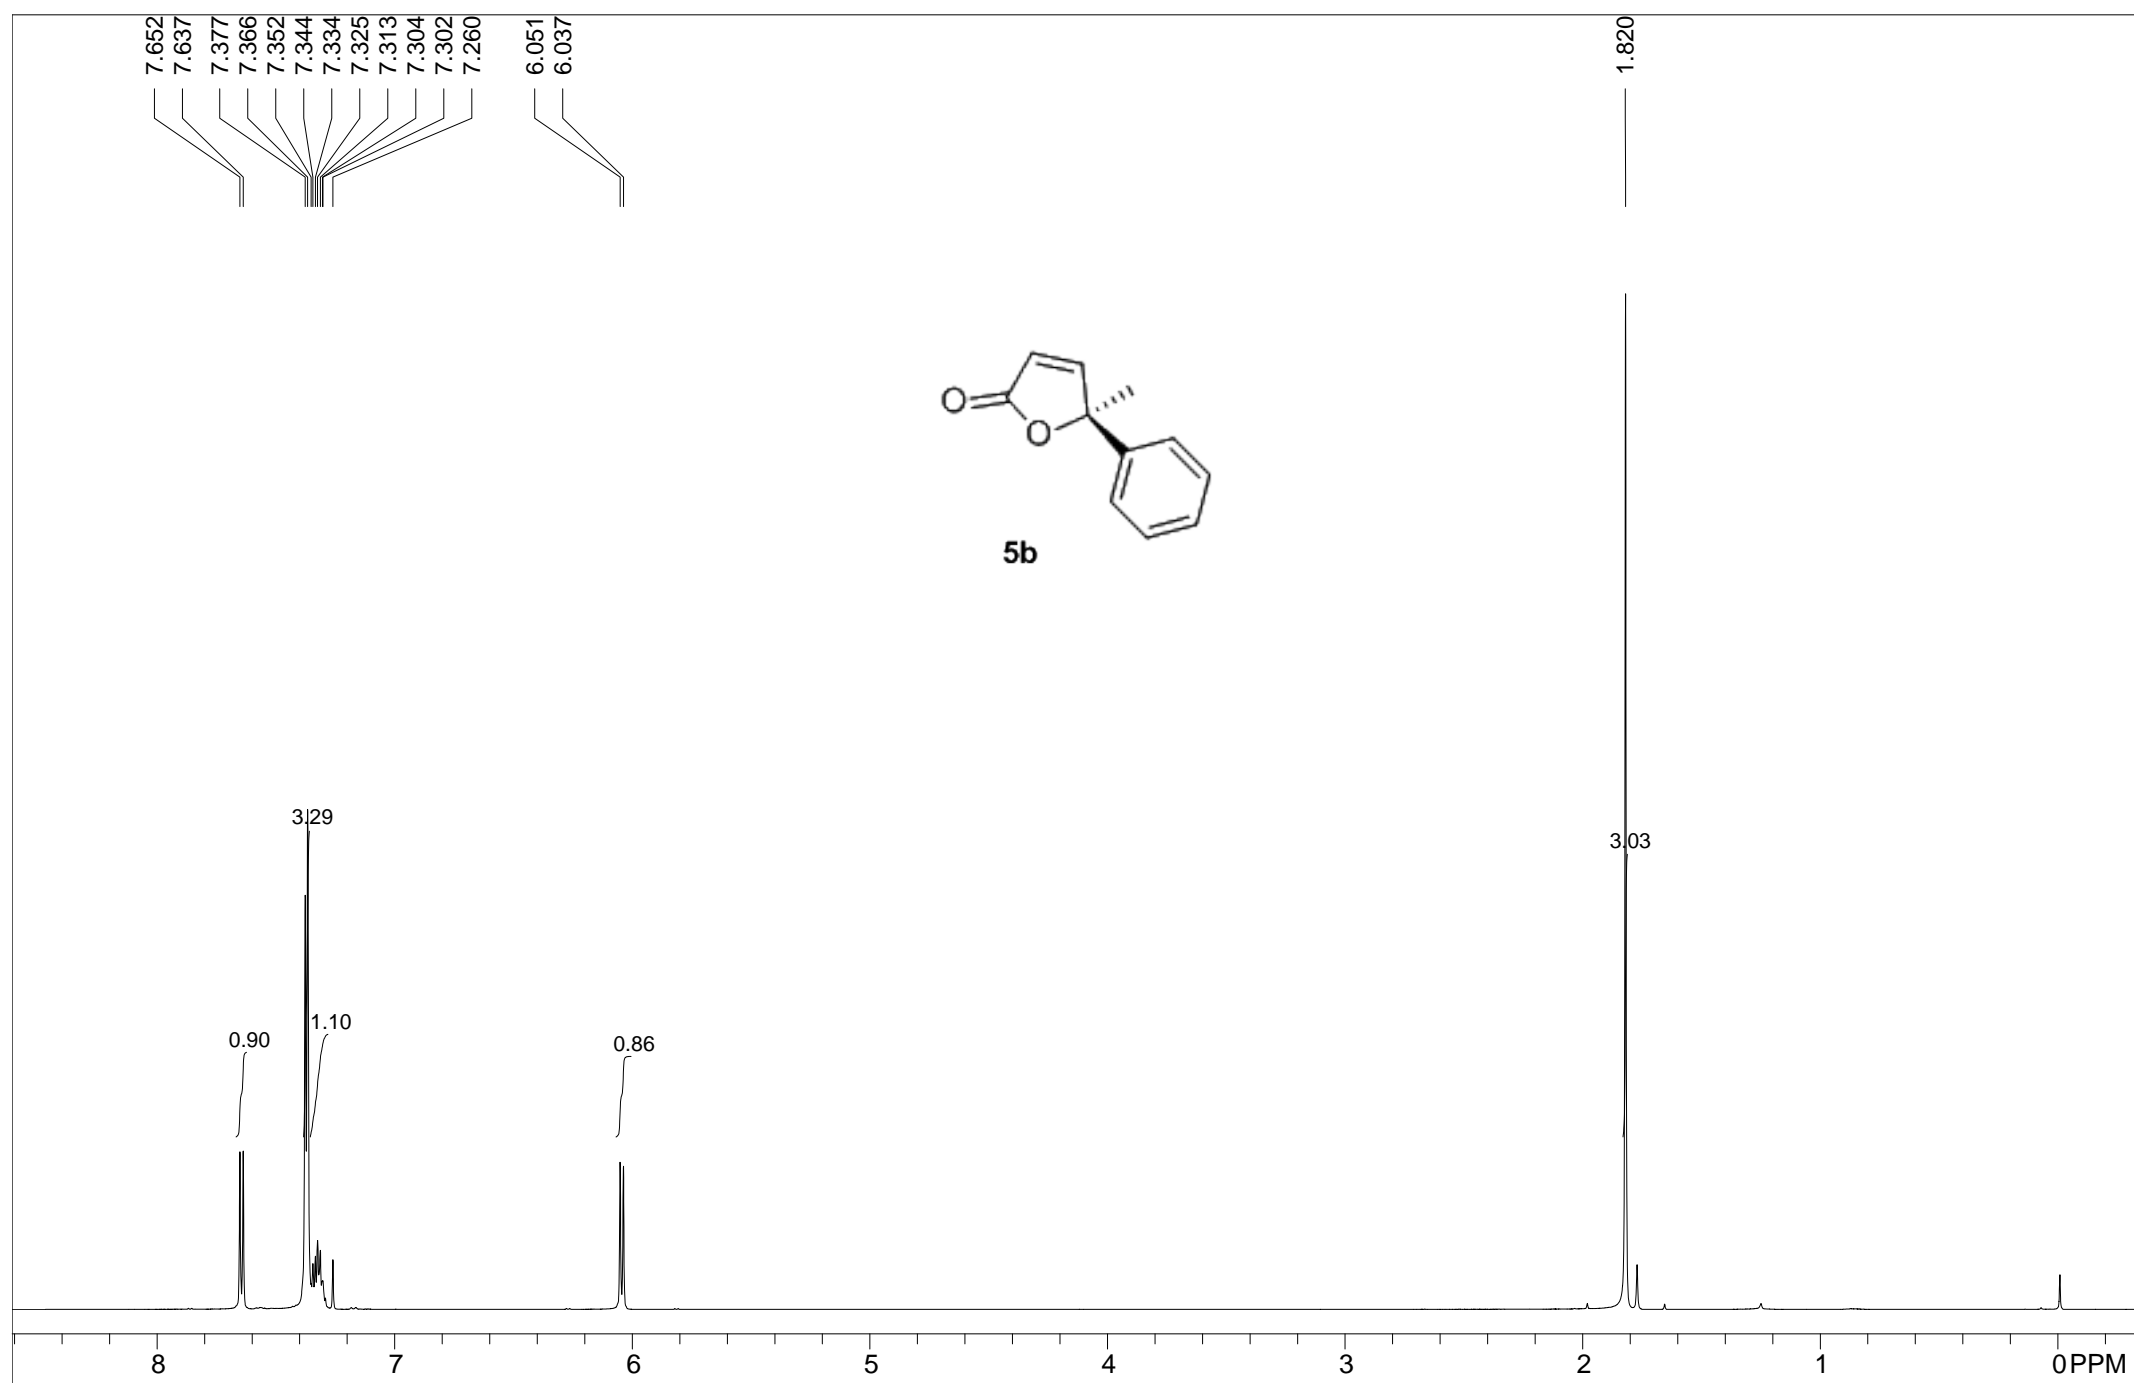

|             |             |             |  |                            |         |                           |  |
|-------------|-------------|-------------|--|----------------------------|---------|---------------------------|--|
| :blank line |             |             |  | USER: -- DATE: Jan 19 2015 |         |                           |  |
| F1: 399.723 | F2: 100.519 | SW1: 7225   |  | OF1: 2778.6                |         | PTS1d: 21676 , 32768      |  |
| EX: s2pul   | PW: 4.4 us  | PD: 1.0 sec |  | NA: 12                     | LB: 0.0 | Nuts - \$5-90-01-HNMR.fid |  |

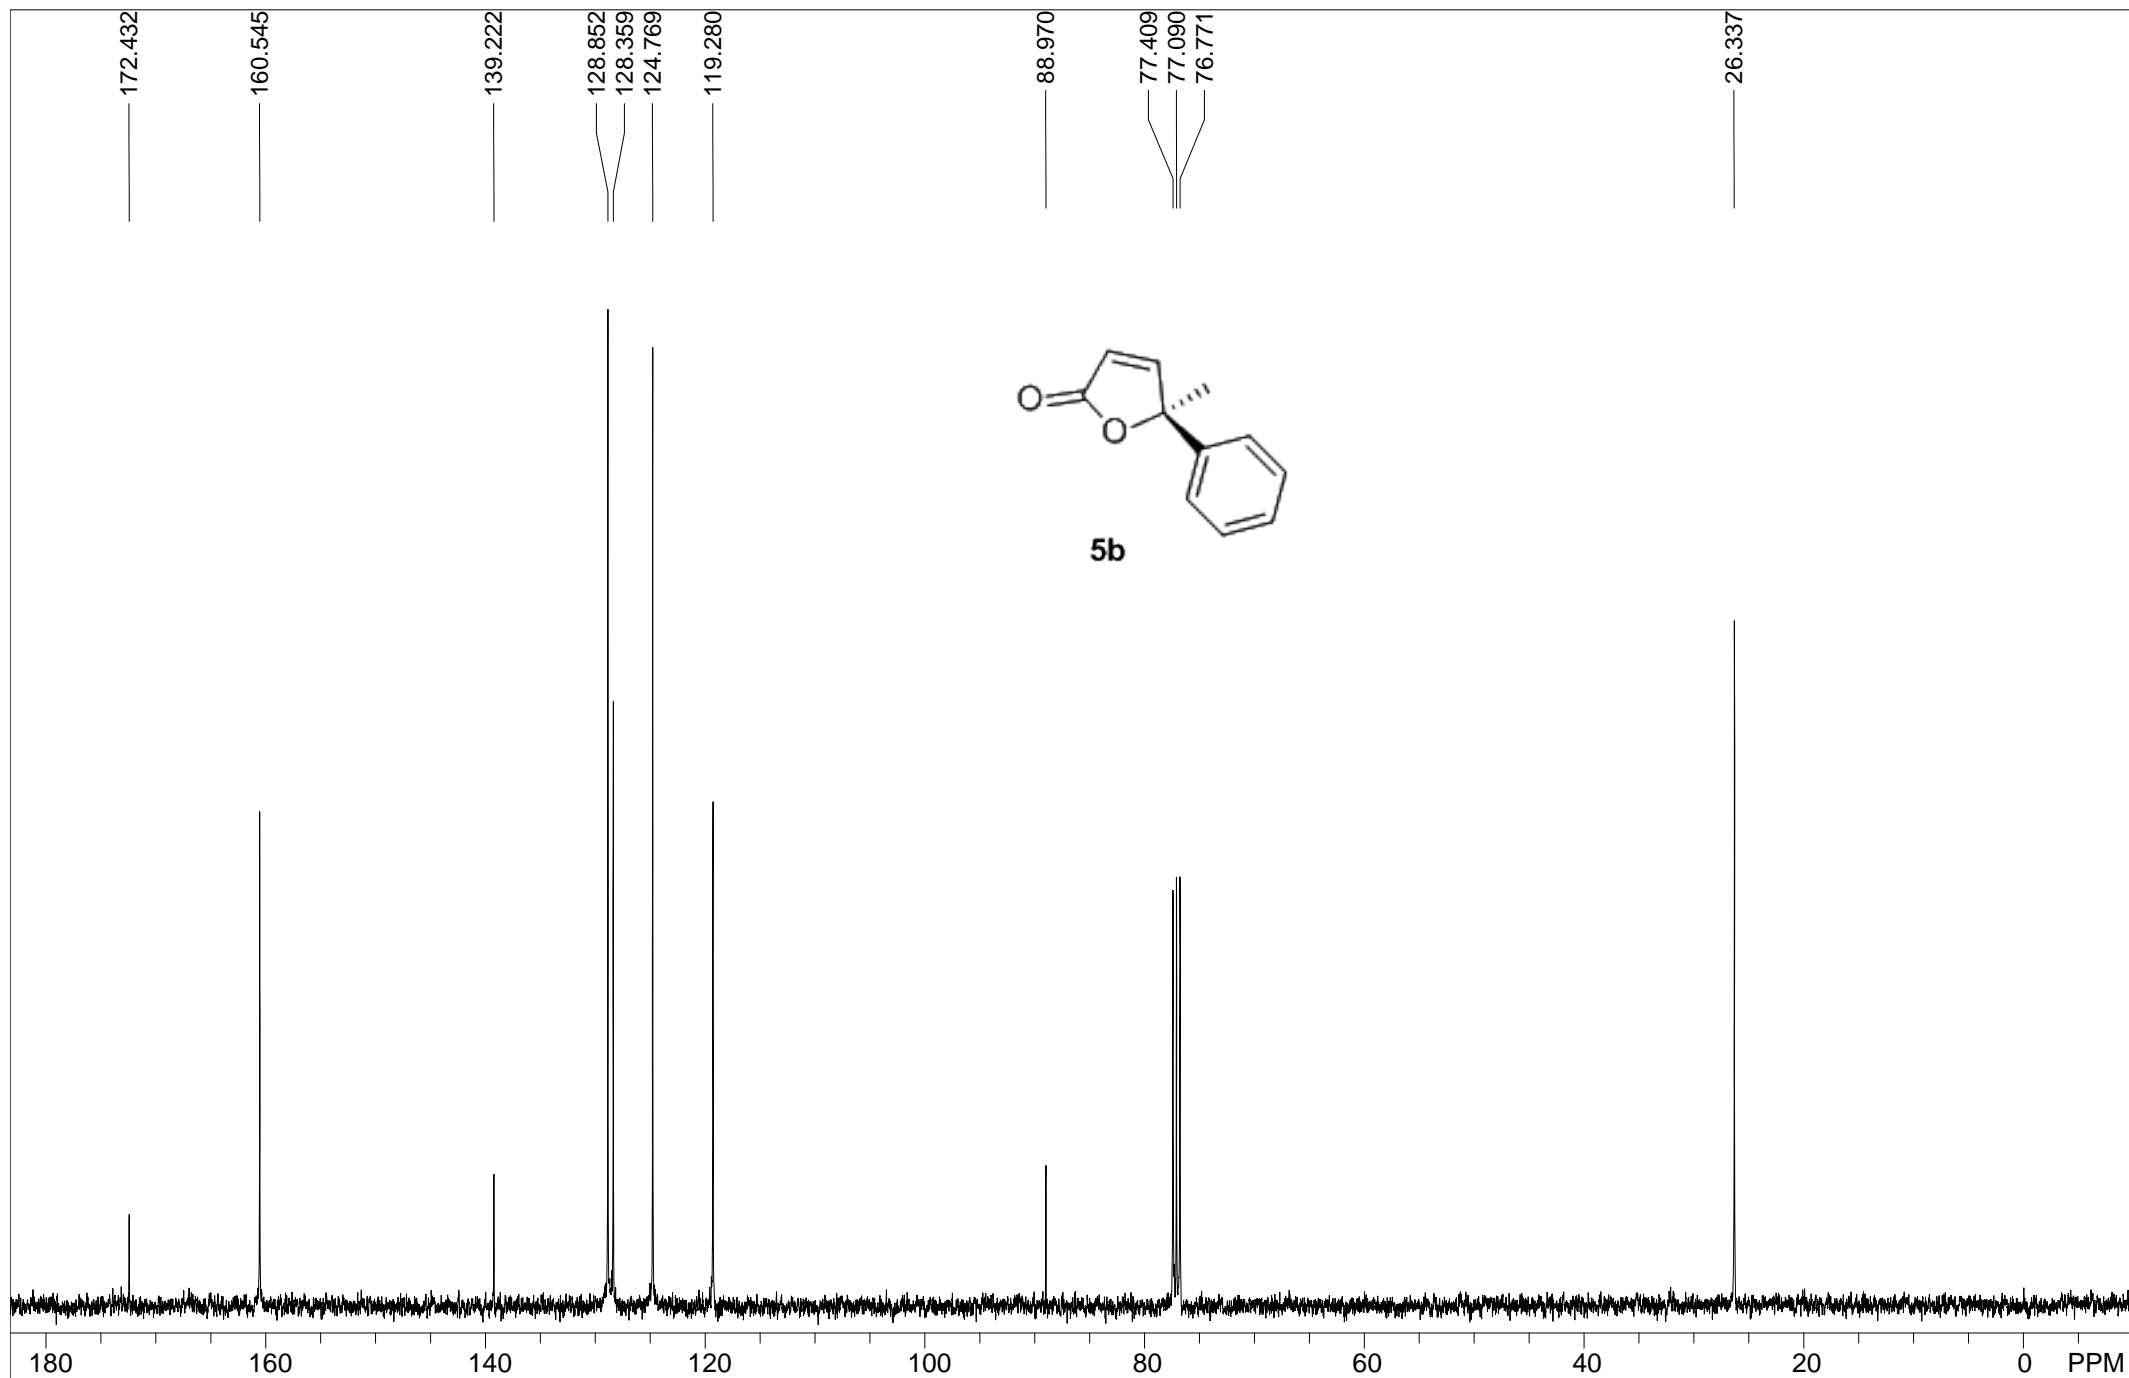

new experiment

USER: -- DATE: Jan 19 2015

|             |             |             |  |              |         |                             |
|-------------|-------------|-------------|--|--------------|---------|-----------------------------|
| F1: 100.521 | F2: 399.722 | SW1: 25000  |  | OF1: 11056.1 |         | PTS1d: 32768 , 32768        |
| EX: s2pul   | PW: 4.9 us  | PD: 1.0 sec |  | NA: 80       | LB: 2.0 | Nuts - \$5-90-01-CNMR-2.fid |



=====  
Acq. Operator :  
Sample Operator :  
Acq. Instrument : SFC Location : Vial 51  
Injection Date : 1/19/2015 2:16:55 PM Inj Volume : 5.000 µl  
Acq. Method : C:\CHEM32\1\METHODS\AGILENT\_SFC6.M  
Last changed : 1/19/2015 2:09:51 PM by  
(modified after loading)  
Analysis Method : C:\CHEM32\1\METHODS\AGILENT\_SFC6.M  
Last changed : 1/19/2015 3:35:48 PM by  
(modified after loading)  
Additional Info : Peak(s) manually integrated

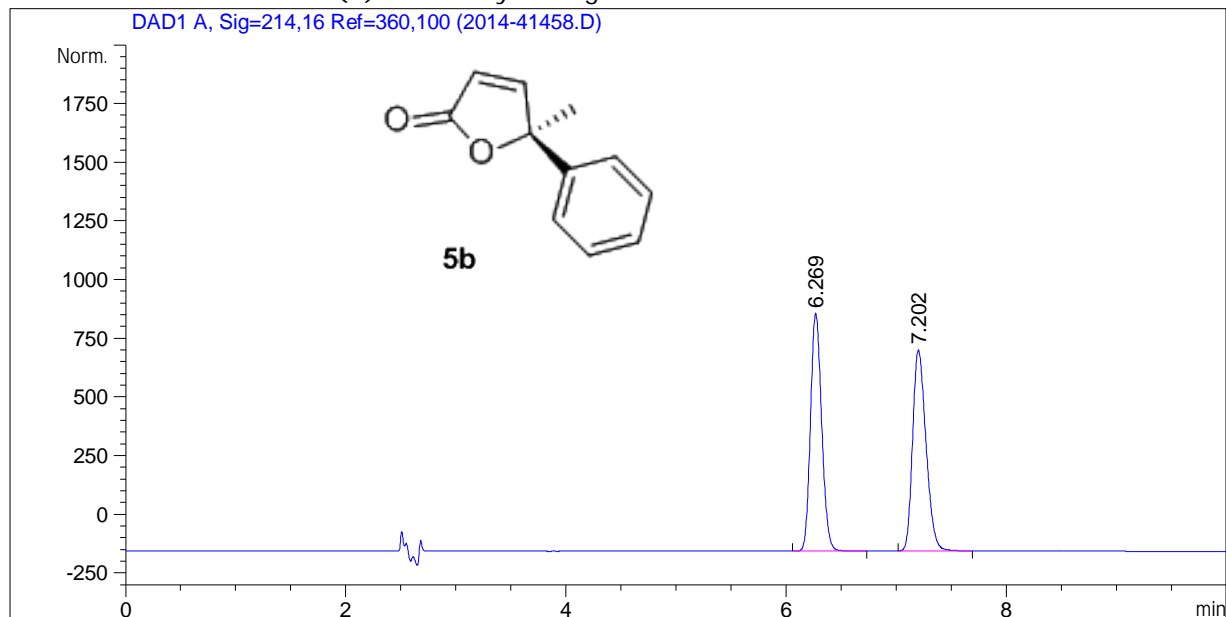

=====  
Area Percent Report  
=====

Sorted By : Signal  
Multiplier : 1.0000  
Dilution : 1.0000  
Do not use Multiplier & Dilution Factor with ISTDs

Signal 1: DAD1 A, Sig=214,16 Ref=360,100

| Peak # | RetTime [min] | Type | Width [min] | Area [mAU*s] | Height [mAU] | Area %  |
|--------|---------------|------|-------------|--------------|--------------|---------|
| 1      | 6.269         | BB   | 0.1106      | 4817.13818   | 680.27386    | 49.7266 |
| 2      | 7.202         | VB   | 0.1319      | 4870.11279   | 574.23053    | 50.2734 |

Totals : 9687.25098 1254.50439

=====  
\*\*\* End of Report \*\*\*

Sample Name: 5-90-01

```

=====
Acq. Operator   :
Sample Operator :
Acq. Instrument : SFC                               Location : Vial 52
Injection Date  : 1/19/2015 2:33:01 PM
                                           Inj Volume : 5.000 µl
Acq. Method     : C:\CHEM32\1\METHODS\AGILENT_SFC6.M
Last changed    : 1/19/2015 2:09:51 PM by
                  (modified after loading)
Analysis Method : C:\CHEM32\1\METHODS\AGILENT_SFC6.M
Last changed    : 1/19/2015 4:00:53 PM by
                  (modified after loading)
Additional Info : Peak(s) manually integrated
  
```

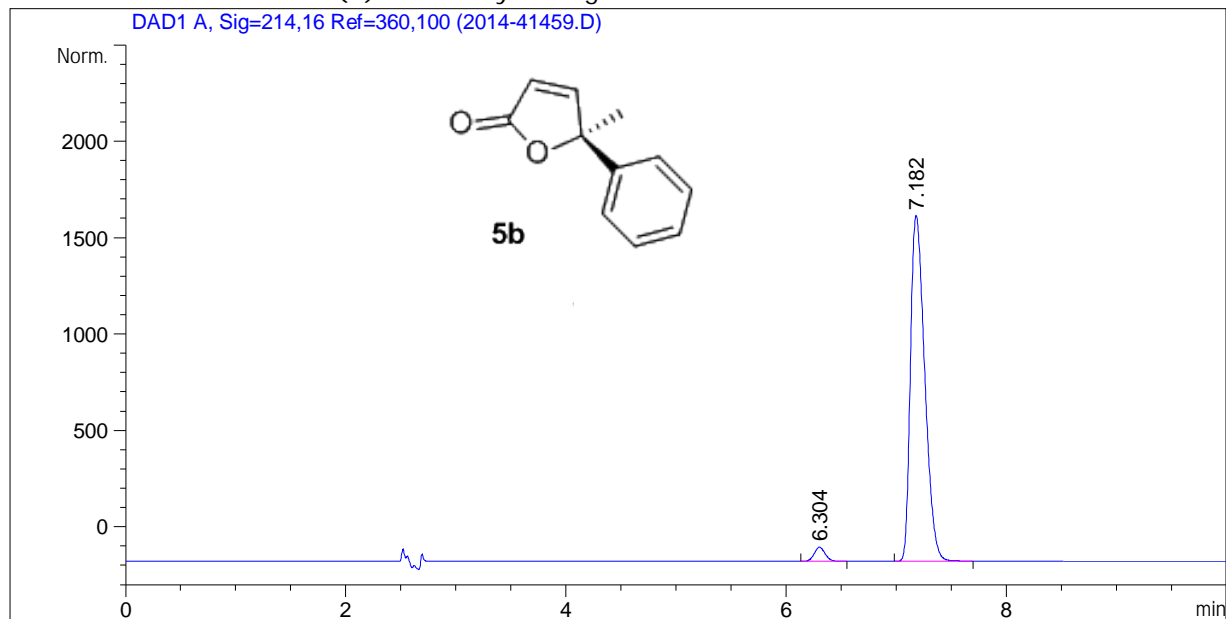

```

=====
                          Area Percent Report
=====
  
```

```

Sorted By      :      Signal
Multiplier     :      1.0000
Dilution       :      1.0000
Do not use Multiplier & Dilution Factor with ISTDs
  
```

Signal 1: DAD1 A, Sig=214,16 Ref=360,100

| Peak # | RetTime [min] | Type | Width [min] | Area [mAU*s] | Height [mAU] | Area %  |
|--------|---------------|------|-------------|--------------|--------------|---------|
| 1      | 6.304         | BB   | 0.1077      | 402.85880    | 58.21651     | 3.0450  |
| 2      | 7.182         | BB   | 0.1399      | 1.28273e4    | 1426.82312   | 96.9550 |

```
Totals :                      1.32302e4  1485.03963
```

```

=====
*** End of Report ***
  
```
